# Supplementary material for: Single-Cell Analyses of a Novel Mouse Urothelial Carcinoma Model Reveal a Role of Tumor-Associated Macrophages in Response to Anti-PD-1 Therapy
Source: MDPI journal article supplement (doi:10.3390/cancers14102511), 2022-05-19
Supplement: s1 [file s1]

## Supplementary Materials

# Single-Cell Analyses of a Novel Mouse Urothelial Carcinoma Model Reveal a Role of Tumor-Associated Macrophages in Response to Anti-PD-1 Therapy

Dongbo Xu <sup>1</sup>, Li Wang <sup>1</sup>, Kyle Wieczorek <sup>1</sup>, Yali Zhang <sup>2</sup>, Zinian Wang <sup>3</sup>, Jianmin Wang <sup>2</sup>, Bo Xu <sup>4</sup>, Prashant K Singh <sup>5</sup>, Yanqing Wang <sup>6</sup>, Xiaojing Zhang <sup>6</sup>, Yue Wu <sup>1</sup>, Gary J. Smith <sup>1</sup>, Kristopher Attwood <sup>2</sup>, Yuesheng Zhang <sup>6</sup>, David W. Goodrich <sup>6</sup>, Qiang Li <sup>1, 6, \*</sup>

<sup>1</sup> Department of Urology, Roswell Park Comprehensive Cancer Center, Buffalo, NY 14203, USA; Dongbo.Xu@RoswellPark.org (D.X.); Li.Wang@RoswellPark.org (L.W.); Kyle.Wieczorek@RoswellPark.org (K.W.); Yue.Wu@RoswellPark.org (Y.W.); Gary.Smith@RoswellPark.org (G.J.S.)

<sup>2</sup> Department of Biostatistics & Bioinformatics, Roswell Park Comprehensive Cancer Center, Buffalo, NY 14203, USA; Yali.Zhang@RoswellPark.org (Y.Z.); Jianmin.Wang@RoswellPark.org (J.W.); Kristopher.Attwood@RoswellPark.org (K.A.)

<sup>3</sup> Departments of Cancer Prevention and Control, Roswell Park Comprehensive Cancer Center, Buffalo, NY 14203, USA; Zinian.Wang@RoswellPark.org

<sup>4</sup> Departments of Pathology, Roswell Park Comprehensive Cancer Center, Buffalo, NY 14203, USA; Bo.Xu@RoswellPark.org

<sup>5</sup> Departments of Cancer Genetics & Genomics, Roswell Park Comprehensive Cancer Center, Buffalo, NY 14203, USA; Prashant.Singh@RoswellPark.org

<sup>6</sup> Department of Pharmacology & Therapeutics, Roswell Park Comprehensive Cancer Center, Buffalo, NY 14203, USA; Yanqing.Wang@RoswellPark.org (Y.W.); Xiaojing.Zhang@RoswellPark.org (X.Z.); Yuesheng.Zhang@RoswellPark.org (Y.Z.); David.Goodrich@RoswellPark.org (D.W.G.)

\* Correspondence: Qiang.Li@RoswellPark.org; Tel.: +1-716-845-3389; Fax: +1-716-845-3300

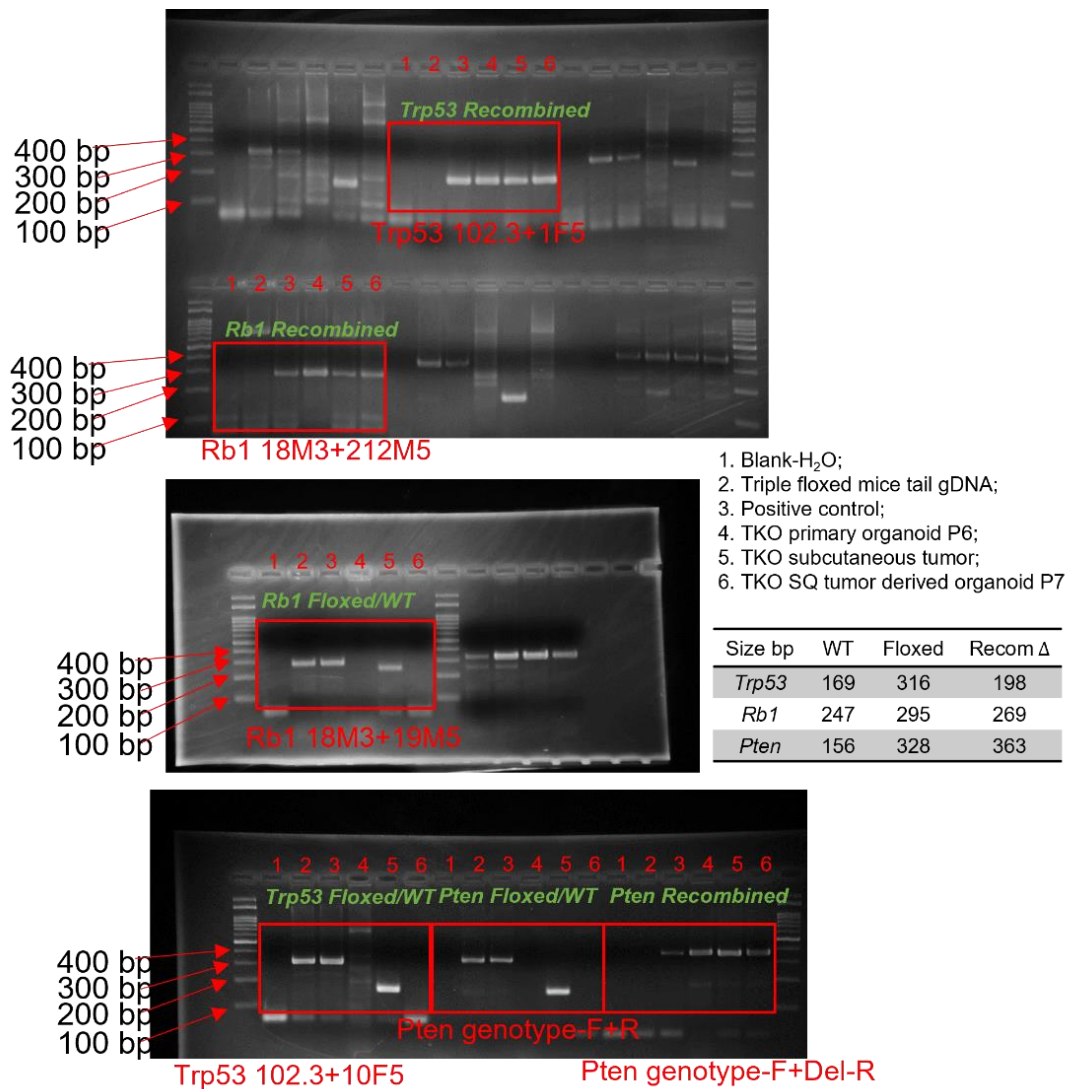

**Supplemental Figure S1.** The original PCR results using DNA gel electrophoresis. Gels were stained with ethidium bromide. The expected size of PCR bands (WT, Floxed, and Recombination alleles) were listed in the table. Sequences of primers in red fonts were listed in Supplemental Table S2.

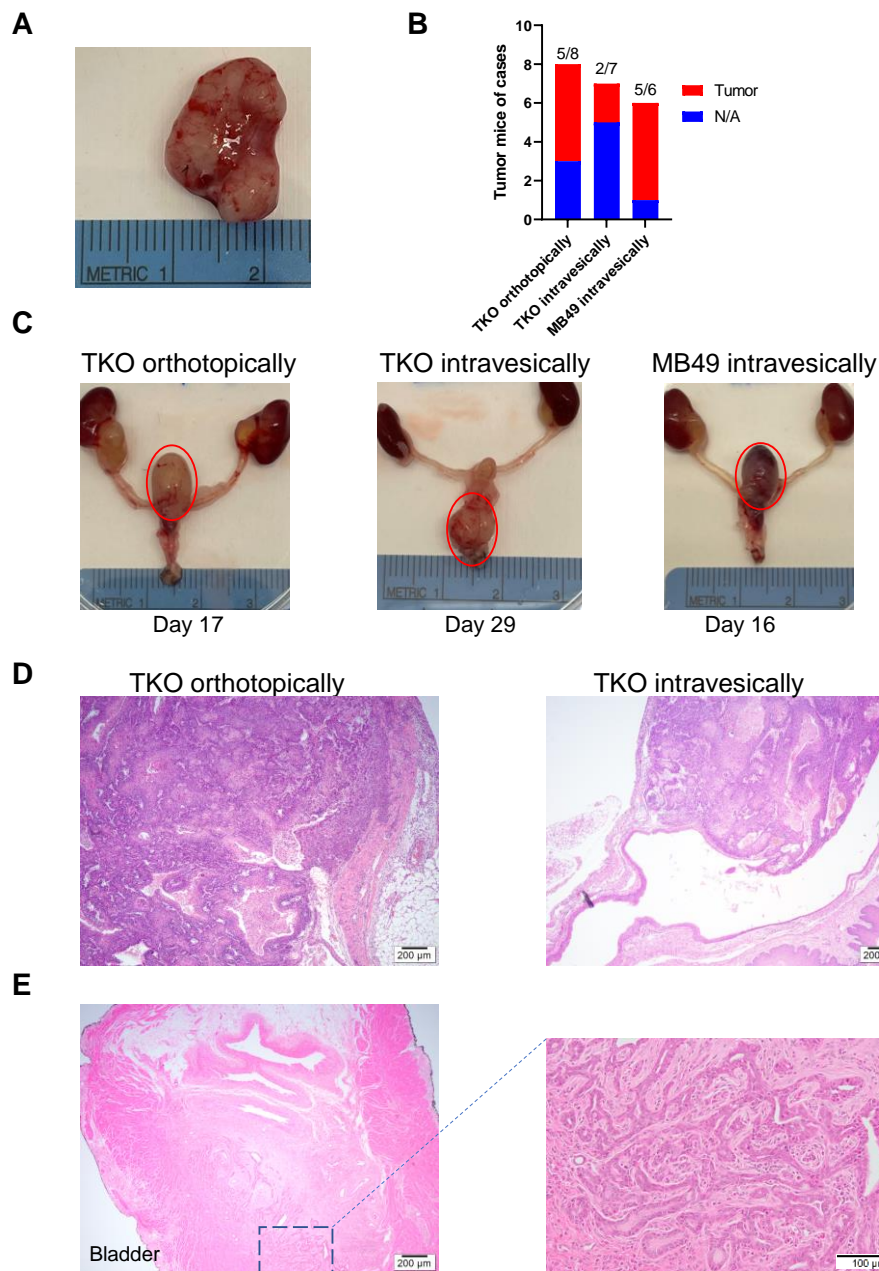

**Supplemental Figure S2.** The tumor formation of TKO cells by subcutaneous, orthotopic and intravesical injections in C57 BL/6J mice. **(A)** A gross TKO subcutaneous tumor on day 14 was shown after subcutaneous injection of 2 million TKO cell suspensions. **(B)** Tumors take rates of 2 million TKO cell suspension injection orthotopically and intravesically. **(C)** Representative gross pictures of a TKO orthotopic tumor, a TKO intravesical tumor, and a MB49 intravesical tumor. Orthotopic injection was performed by bladder wall injection with Hamilton microliter syringe, whereas intravesical injection by a 24G catheter delivery. **(D)** H&E staining of TKO orthotopic tumor and TKO intravesical tumor. **(E)** A TKO orthotopic tumor showed muscle-invasive disease.



**A**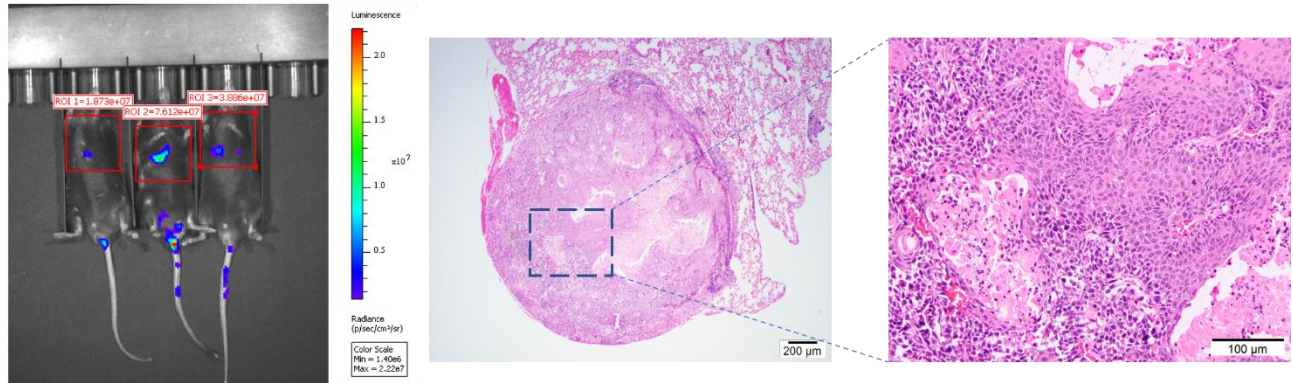**B**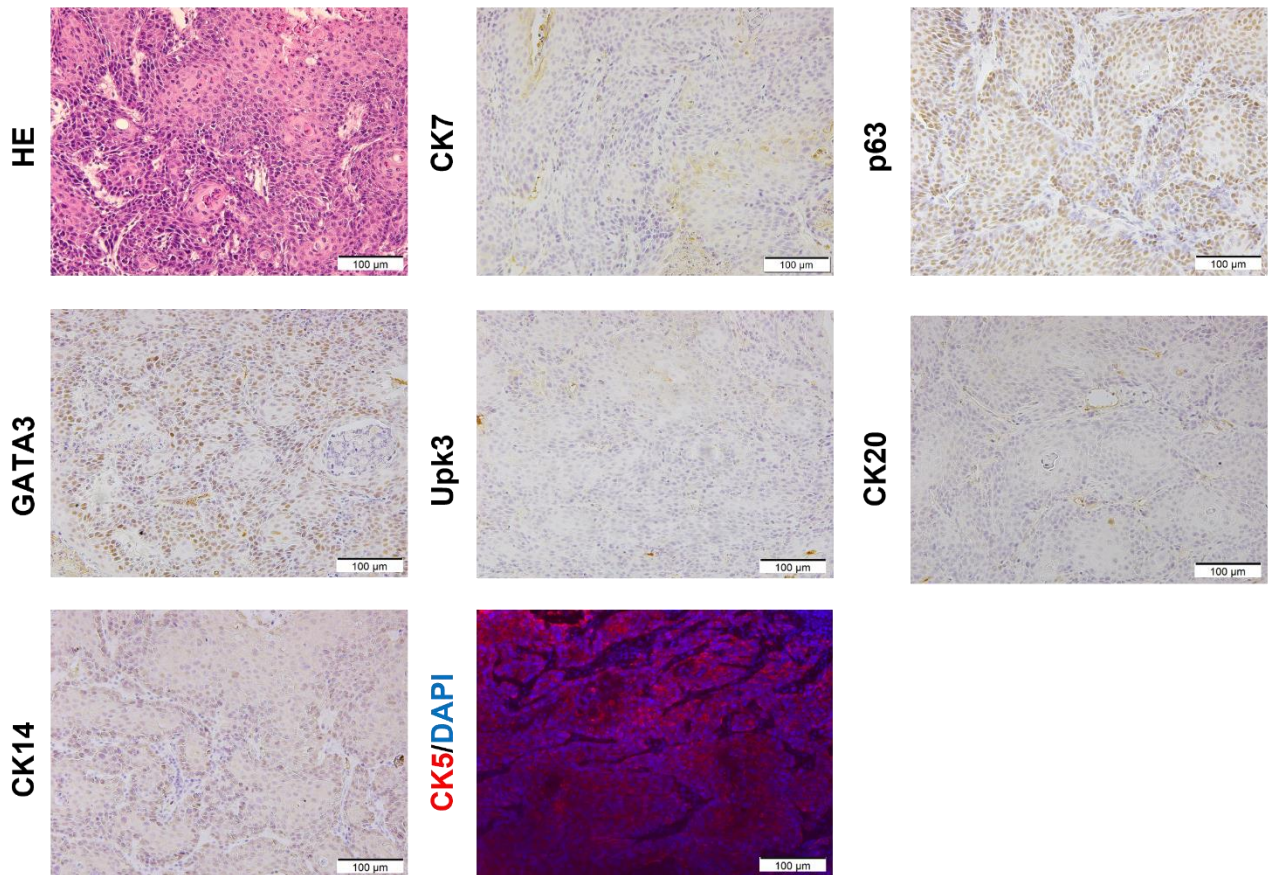

**Supplemental Figure S3.** The tumor formation of the TKO cells by tail vein injections and bladder orthotopic injections (into the bladder wall) in C57 BL/6J mice. **(A)** The TKO cells were labeled by *pFUGW-Pol2-ffLuc2-eGFP* (Addgene: Plasmid #71394). 1 million TKO cells with luciferase tag were injected into mouse tail vein of C57 BL/6J mice. Luminescence was detected on day 29 after injection in all (3/3) mice. H&E staining of lung tumor nodule at the endpoint of day 29. **(B)** H&E and IHC staining of indicated markers in the TKO orthotopic bladder tumors.

**A**

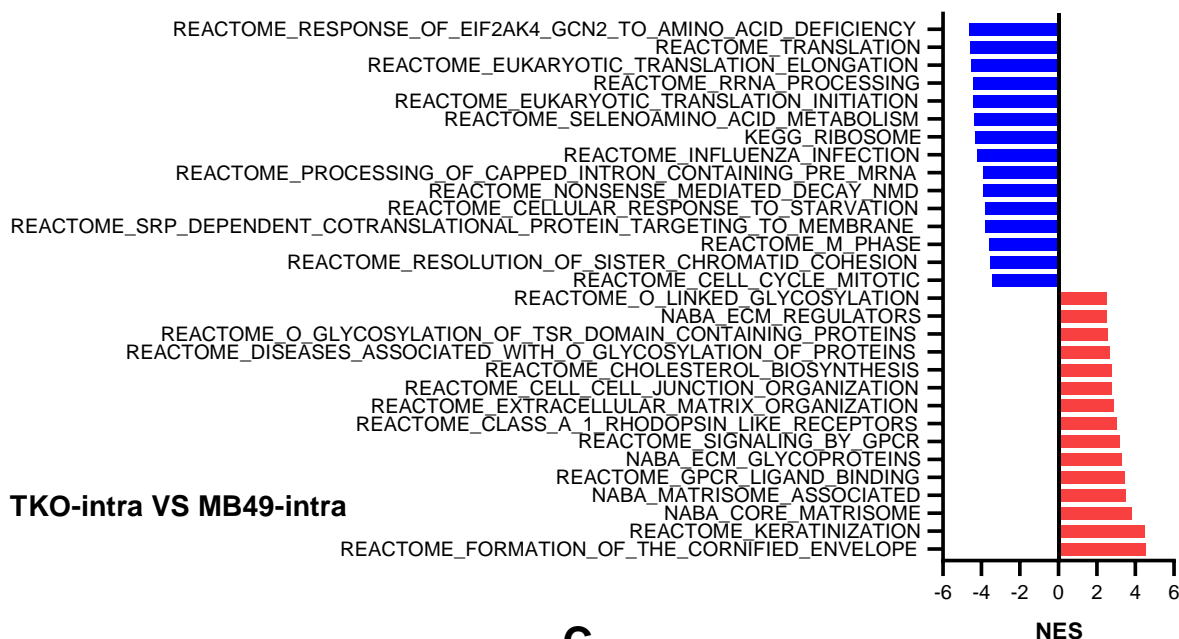

**B**

**TKO-intra VS MB49-inta**

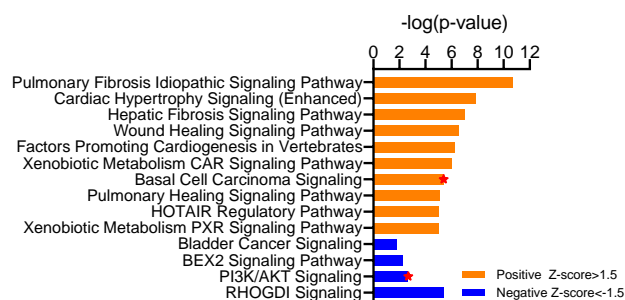

**C**

**TKO-intra VS Normal female WT**

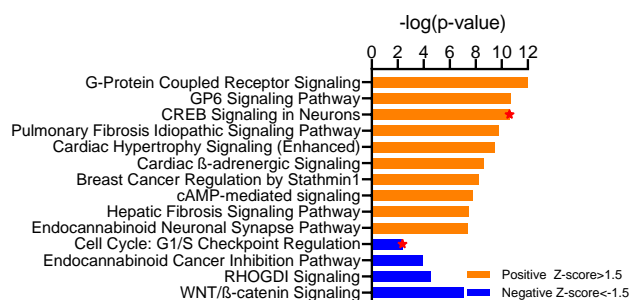

**Supplemental Figure S4.** GSEA analysis and IPA analysis of TKO intravesical tumors. **(A)** GSEA analysis comparing TKO-intra tumors and MB49-intra tumors. Positive normalized enrichment scores (NES) in red color indicated up-regulation in TKO-intra, whereas negative NES score in blue color indicated down-regulation in TKO-intra tumor. **(B)** Top significantly affected (Z score > 1.5 or < -1.5) canonical pathways based on IPA analysis comparing TKO-intra and MB49-intra tumors samples. Yellow color indicates activation, while blue color indicates inhibition. **(C)** Canonical pathways analysis by IPA comparing TKO-intra and normal female wild-type (WT) urothelial cells.

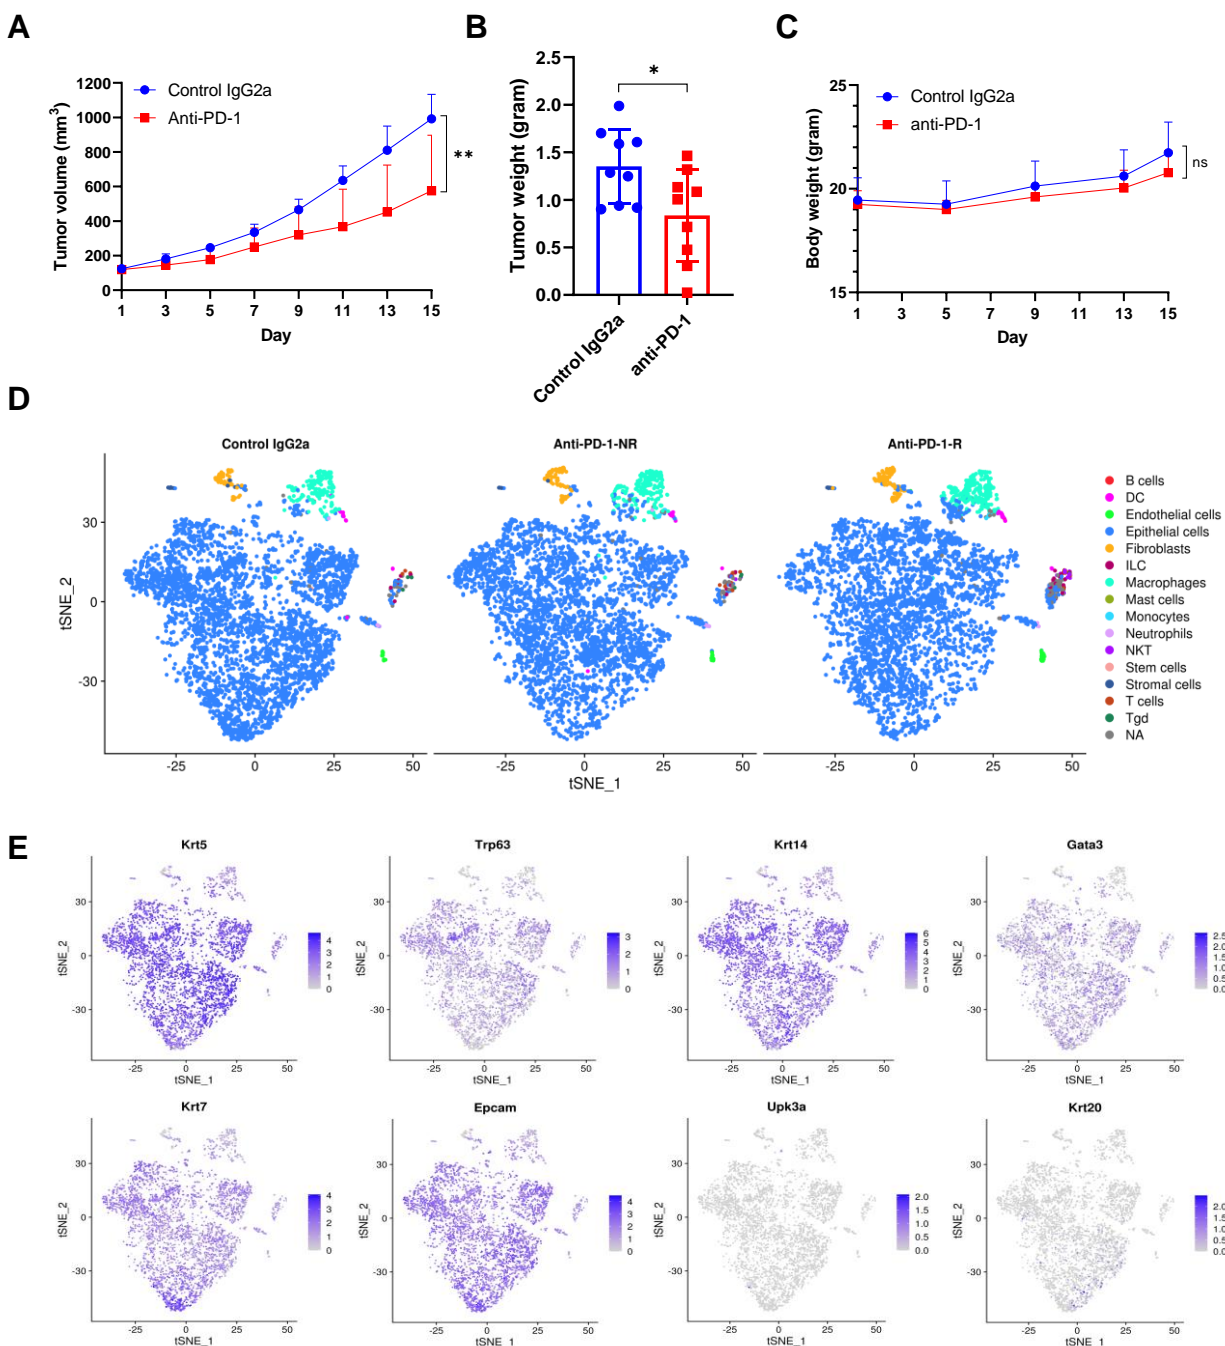

**Supplemental Figure S5.** Anti-PD-1 treatment of TKO subcutaneous tumors in C57 BL/6J mice and single cell analysis. **(A)** Mean tumor volume changes in C57 mice bearing TKO tumors treated with anti-PD-1 (n = 9, red) or a control IgG2a (n = 9, blue). **(B)** Mean tumor weights of TKO tumors treated with anti-PD-1 (n = 9, red) or a control IgG2a (n = 9, blue). **(C)** Mean body weight changes in C57 mice treated with anti-PD-1 and control IgG2a. **(D)** t-SNE clustering analyses of all cells in xenograft tumors from control IgG2a treatment (n = 2, 4762), anti-PD-1 non-responders (n = 2, 4459) and anti-PD-1 responders (n = 2, 4861). **(E)** Feature single gene plots for visualizing urothelial biomarkers (Krt5, Trp63, Krt14, GATA3, Krt7, EpCAM, Upk3a and Krt20) genes expression in Control IgG2a tumors. Single gene expression pattern was confirmed the IHC staining results. *p*-value, Welch's *t*-test.



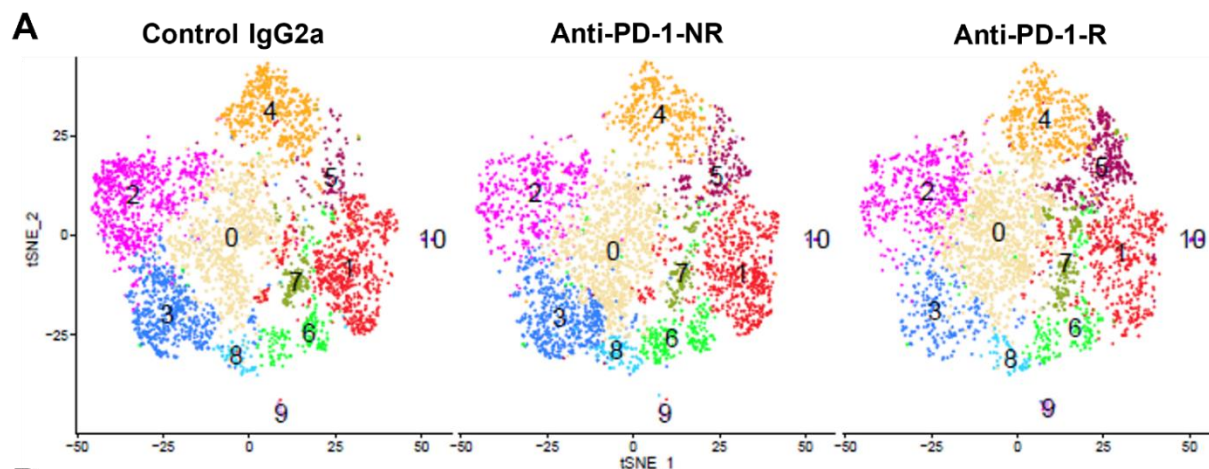

**B**

**Cell counts and percentages of identified clusters in EpCAM highly expressed tumor cells**

| Cluster | Control IgG2a<br>Cell count | Anti-PD-1-NR<br>Cell count | Anti-PD-1-R<br>Cell count | Control IgG2a %<br>in tumor cell | Anti-PD-1-NR %<br>in tumor cell | Anti-PD-1-R %<br>in tumor cell |
|---------|-----------------------------|----------------------------|---------------------------|----------------------------------|---------------------------------|--------------------------------|
| 0       | 783                         | 945                        | 1110                      | 18.07                            | 24.40                           | 28.53                          |
| 1       | 810                         | 722                        | 535                       | 18.69                            | 18.64                           | 13.75                          |
| 2       | 905                         | 491                        | 557                       | 20.89                            | 12.68                           | 14.32                          |
| 3*      | 665                         | 573                        | 232                       | 15.35                            | 14.79                           | 5.96                           |
| 4       | 590                         | 371                        | 429                       | 13.62                            | 9.58                            | 11.03                          |
| 5*      | 106                         | 233                        | 488                       | 2.45                             | 6.02                            | 12.54                          |
| 6       | 212                         | 278                        | 211                       | 4.89                             | 7.18                            | 5.42                           |
| 7       | 156                         | 133                        | 196                       | 3.60                             | 3.43                            | 5.04                           |
| 8       | 73                          | 108                        | 67                        | 1.68                             | 2.79                            | 1.72                           |
| 9       | 16                          | 8                          | 48                        | 0.37                             | 0.21                            | 1.23                           |
| 10      | 17                          | 11                         | 18                        | 0.39                             | 0.28                            | 0.46                           |

\*cluster 3 and 5 changed significantly across 3 samples.

**Supplementary Figure S6.** Re-analyzing EpCAM highly expressed tumor cells. (A) t-SNE clustering of re-analyzing EpCAM highly expressed tumor cells in the TKO tumor treated with IgG2a, anti-PD-1 (non-responders), and anti-PD-1 (responders). (B) Cell counts and percentages of identified clusters with EpCAM highly expression. Cluster 3 significantly decreased and cluster 5 increased after an-PD-1 treatment (\*).

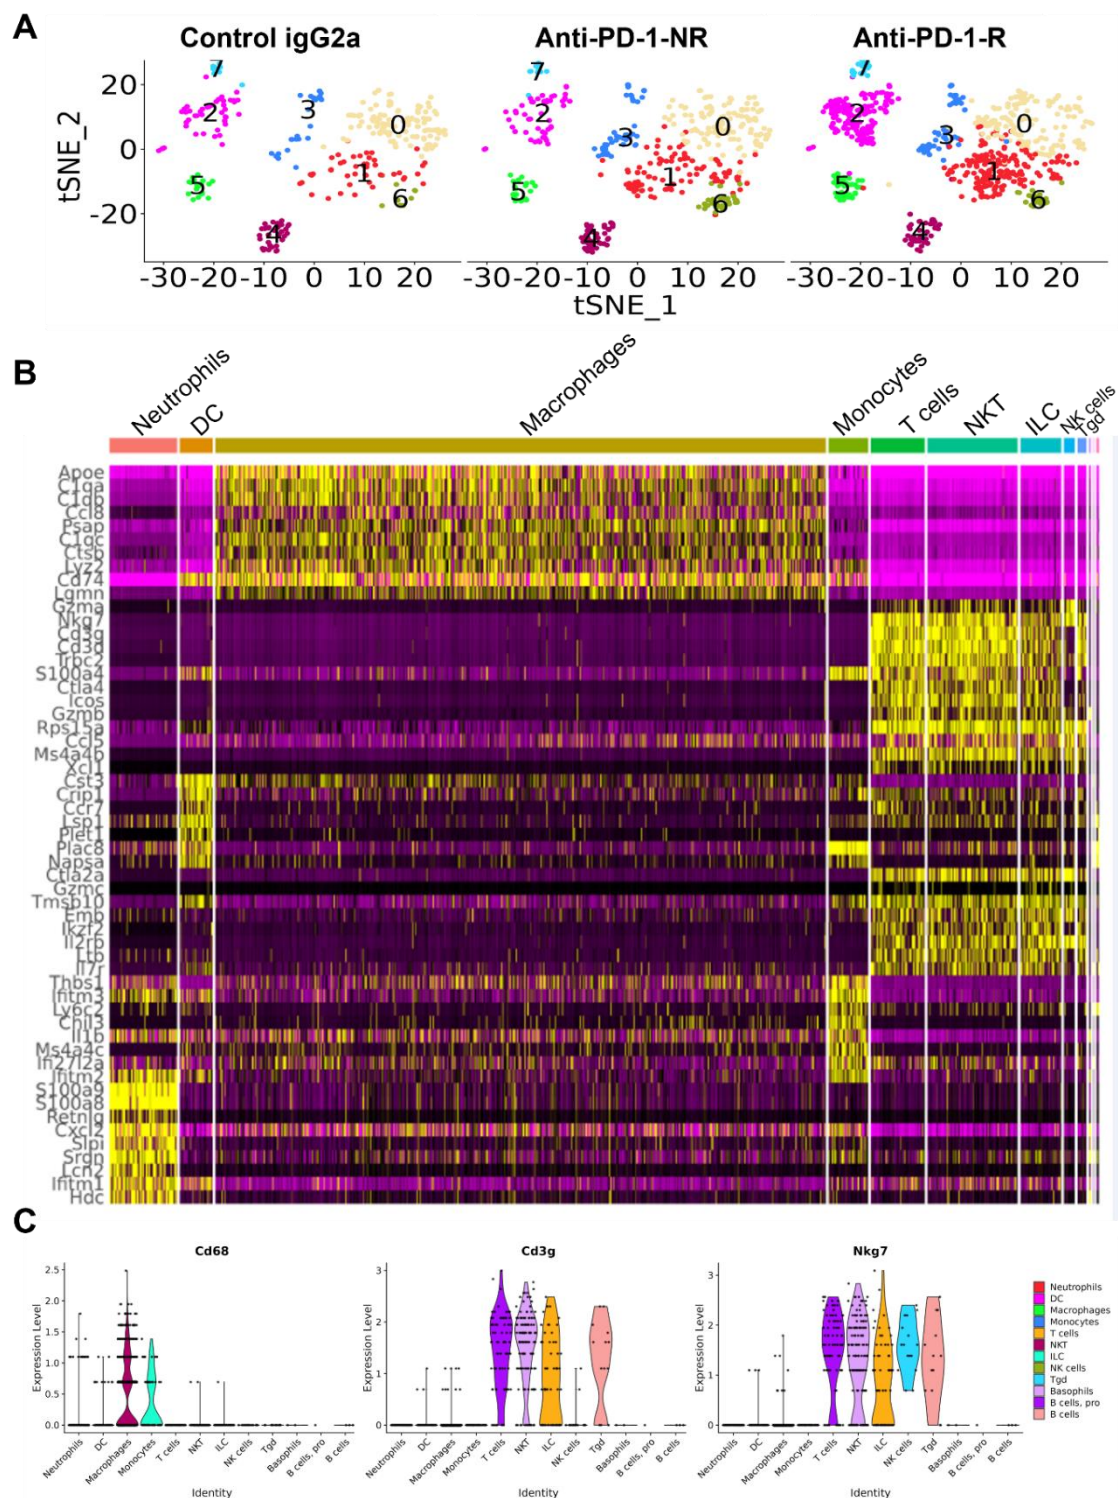

**Supplemental Figure S7.** The identification of immune cells in the TKO tumors. **(A)** t-SNE clustering of immune cells with high CD45 expression. Eight clusters of immune cells were identified in tumors. **(B)** Clustering heatmap of immune cell types in the TKO tumors across the top 10 most differentially expressed genes. **(C)** Violin plots of representative immune cell markers in macrophage (Cd68), T cells (Cd3g), and NKT cells (Nkg7).



**A** Responder.vs.Non\_Responder in Tumor subset

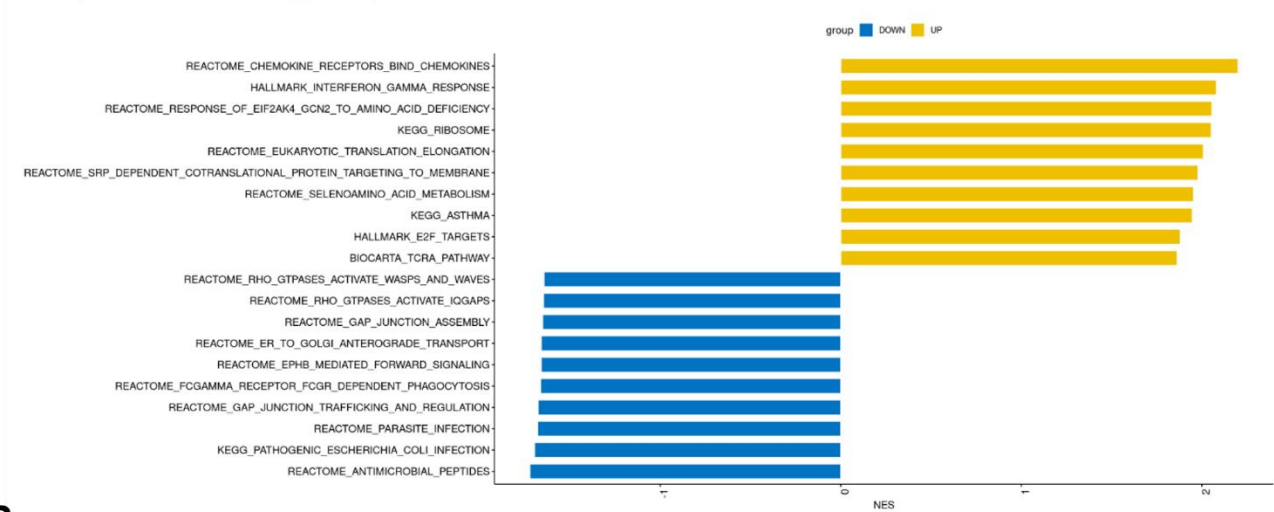

**B** Responder.vs.Non\_Responder in T cells

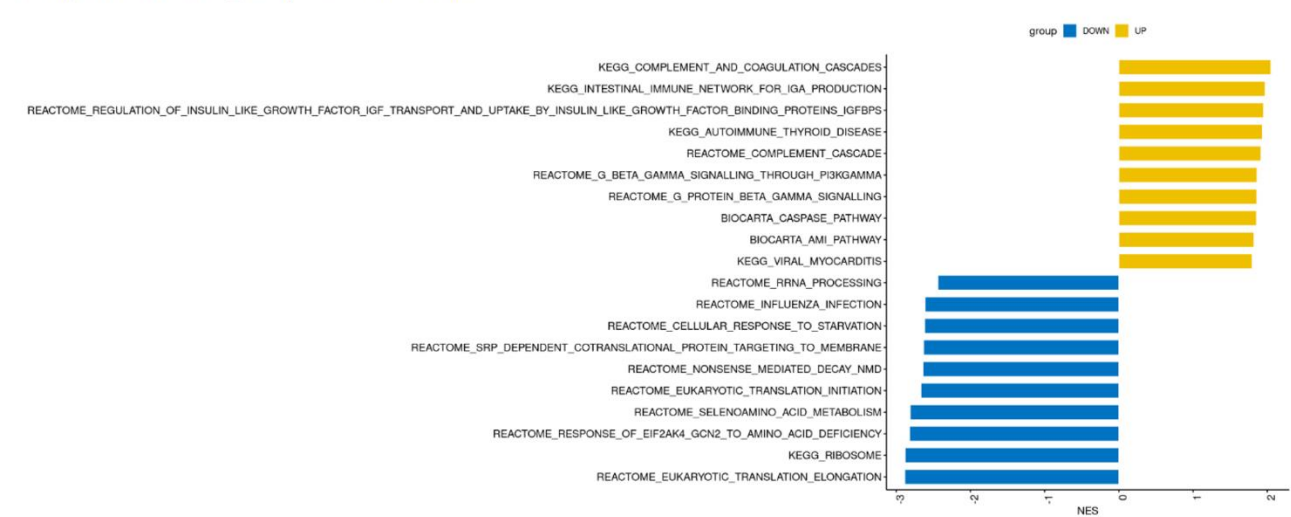

**C** Responder.vs.Non\_Responder in Macrophages

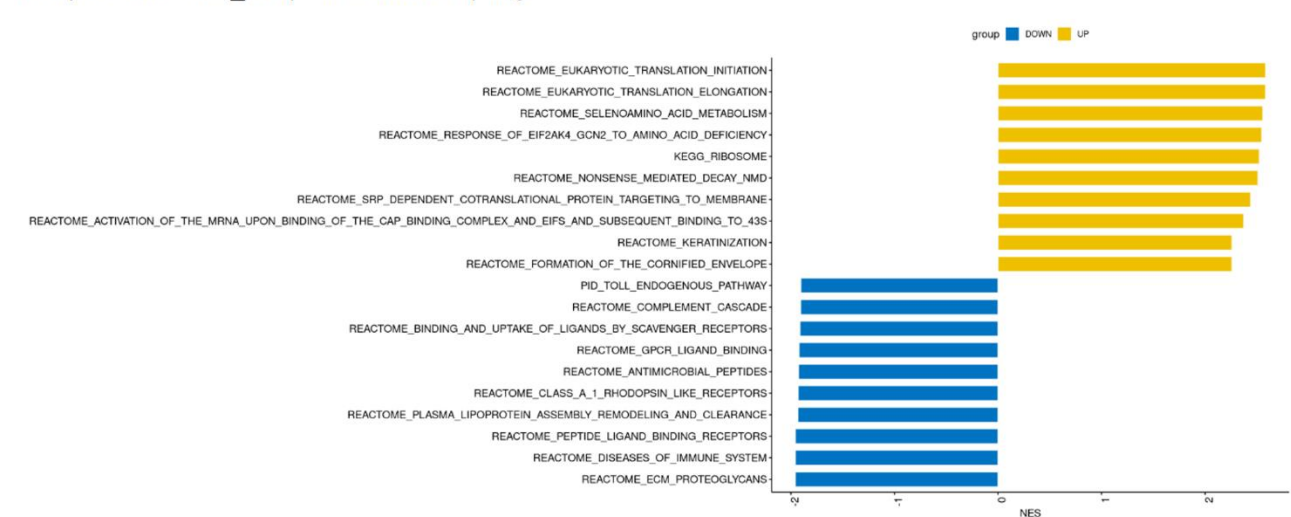

**Supplemental Figure S8.** The Gene Set Enrichment Analysis of tumor cells and immune cells in responders and non-responders. The significant pathways ( $p_{adj} < 0.05$ ) were ranked by NES (Normalized Enrichment Scores). Positive NES score in yellow color indicated up-regulation in responders, whereas negative NES score in blue color indicated down-regulation in responders. **(A)** Top significantly affected pathways of comparing tumor cells in responders and tumor cells in non-responders. Note chemokine receptor and IFN-gamma response related genes are upregulated in tumor cells responders compared to tumor cells in non-responders. **(B)** Top significantly affected pathways of comparing T cells in responders and T cells in non-responders. **(C)** Top significantly affected pathways of comparing macrophages in responders and macrophages in non-responders.

**Supplemental Table S1.** The primers used in this study for genotyping.

| Primer          | Sequence 5' to 3'         |
|-----------------|---------------------------|
| Trp53 10F5      | GTTAAGGGGTATGAGGGACAAGGTA |
| Trp53 102.3     | CCATGAGACAGGGTCTTGCTATTGT |
| Trp53 1F5       | GTGCCCTCCGTCCTTTTTCGCAATC |
| Rb1 18M3        | GGAATTCCGGCGTGTGCCATCAATG |
| Rb1 19EM5       | AGCTCTCAAGAGCTCAGACTCATGG |
| Rb1 212M5       | CGAAAGGAAAGTCAGGGACATTGGG |
| Pten genotype-F | CAAGCACTCTGCGAACTGAG      |
| Pten genotype-R | AAGTTTTTGAAGGCAAGATGC     |
| Pten Del-R      | GCTTGATATCGAATTCCTGCAGC   |

**Supplemental Table S2.** The antibodies used in this study.

| Antibody                               | Company                              | Catalog    | Applications       |
|----------------------------------------|--------------------------------------|------------|--------------------|
| Monoclonal mouse anti-CK20             | DAKO                                 | M7019      | IHC 1:100/IF 1:100 |
| Monoclonal mouse anti-CK7              | Santa Cruz Biotechnology             | SC-23876   | IHC 1:50/IF 1:50   |
| Monoclonal mouse anti-p63              | Abcam                                | ab735      | IHC 1:100/IF 1:50  |
| Monoclonal mouse anti-Upk3             | Fitzgerald                           | 10R-U103A  | IHC 1:50           |
| Monoclonal rat anti-CK8                | Developmental Studies Hybridoma Bank | TROMA-I-s  | IF 1:100           |
| Polyclonal chicken anti-CK5            | Biologend                            | 905901     | IF 1:500           |
| Monoclonal mouse anti-GATA3            | Santa Cruz Biotechnology             | SC-268     | IHC 1:200          |
| Monoclonal mouse anti-CK14             | Invitrogen                           | MA5-11599  | IHC 1:150          |
| Monoclonal rat anti-CD4                | Invitrogen                           | 14-9766-82 | IHC 1:250          |
| Monoclonal rabbit anti-CD8             | Cell Signaling Technology            | 98941S     | IHC 1:400          |
| Monoclonal rabbit anti-PD-1            | Cell Signaling Technology            | D7D5W      | IHC 1:200          |
| Monoclonal rat anti-F4/80              | Biologend                            | 123101     | IHC 1:600          |
| Goat anti-Rat IgG, Alexa Fluor 488     | Invitrogen                           | A-11006    | IF 1:250           |
| Goat anti-Chicken IgG, Alexa Fluor 594 | Invitrogen                           | A-11042    | IF 1:1000          |
| Goat anti-Mouse IgG, Alexa Fluor 488   | Invitrogen                           | A-11001    | IF 1:250           |
| Goat anti-Mouse IgG, Alexa Fluor 594   | Invitrogen                           | A-11005    | IF 1:1000          |



**Supplemental Table S3.** The cell counts and percentages of identified cell types in all cells.

| Cell type         | Control IgG2a<br>Cell count | Anti-PD-1-NR<br>Cell count | Anti-PD-1-R<br>Cell count | Control IgG2a %<br>in total cell | Anti-PD-1-NR %<br>in total cell | Anti-PD-1-R %<br>in total cell |
|-------------------|-----------------------------|----------------------------|---------------------------|----------------------------------|---------------------------------|--------------------------------|
| B cells           | 0                           | 0                          | 2                         | 0.00                             | 0.00                            | 0.04                           |
| DC                | 16                          | 17                         | 25                        | 0.34                             | 0.38                            | 0.51                           |
| Endothelial cells | 20                          | 16                         | 39                        | 0.42                             | 0.36                            | 0.80                           |
| Epithelial cells  | 4398                        | 3990                       | 4147                      | 92.36                            | 89.48                           | 85.31                          |
| Fibroblasts       | 75                          | 97                         | 140                       | 1.57                             | 2.18                            | 2.88                           |
| ILC               | 7                           | 7                          | 39                        | 0.15                             | 0.16                            | 0.80                           |
| Macrophages       | 164                         | 236                        | 285                       | 3.44                             | 5.29                            | 5.86                           |
| Mast cells        | 0                           | 0                          | 1                         | 0.00                             | 0.00                            | 0.02                           |
| Monocytes         | 7                           | 11                         | 11                        | 0.15                             | 0.25                            | 0.23                           |
| Neutrophils       | 5                           | 15                         | 3                         | 0.10                             | 0.34                            | 0.06                           |
| NKT               | 2                           | 2                          | 16                        | 0.04                             | 0.04                            | 0.33                           |
| Stem cells        | 1                           | 0                          | 0                         | 0.02                             | 0.00                            | 0.00                           |
| Stromal cells     | 20                          | 8                          | 20                        | 0.42                             | 0.18                            | 0.41                           |
| T cells           | 4                           | 9                          | 21                        | 0.08                             | 0.20                            | 0.43                           |
| Tgd               | 3                           | 4                          | 5                         | 0.06                             | 0.09                            | 0.10                           |
| NA                | 40                          | 47                         | 107                       | 0.84                             | 1.05                            | 2.20                           |
