# Supplementary material for: Single-Cell Analyses of a Novel Mouse Urothelial Carcinoma Model Reveal a Role of Tumor-Associated Macrophages in Response to Anti-PD-1 Therapy
Source: Cancers (Basel). 2022 May 19;14(10):2511. doi: 10.3390/cancers14102511 (PMC9139541; doi:10.3390/cancers14102511)
Supplement: Supplementary file 1 [file cancers-14-02511-s001.zip › Supplementary.xlsx]

## Sheet: TKO-intra VS MB49-intra IPA-CP
TKO-intra VS MB49-intra IPA canonical pathways
Ingenuity Canonical Pathways	-log(p-value)	Ratio	z-score	Molecules
Axonal Guidance Signaling	17	0.215	#NUM!	ACE2,ADAM12,ADAM28,ADAMTS1,ADAMTS12,ADAMTS14,ADAMTS16,ADAMTS17,ADAMTS3,ADAMTS5,BDNF,BMP2,BMP3,BMP6,DPYSL2,ECE2,EFNA3,EFNA4,EFNB1,EPHA1,EPHA3,EPHA7,EPHB2,EPHB3,FES,FZD1,FZD2,FZD8,GLI3,GLIS2,GNA11,GNA15,GNAI1,GNB4,GNG11,HHIP,ITGA10,ITGA11,ITGA7,ITGAE,ITGB6,ITGB7,KALRN,L1CAM,LIMK2,MMP11,MMP15,MMP17,MMP3,MMP7,MRAS,MYL7,MYL9,NFATC1,NFATC2,NGFR,NRP2,NTF4,NTN1,NTNG1,NTRK3,PAK3,PAK6,PAPPA,PDGFB,PGF,PIK3R…
Role of Macrophages, Fibroblasts and Endothelial Cells in Rheumatoid Arthritis	8.57	0.196	#NUM!	APC2,C5,CALML5,CAMK2B,CCND1,CEBPA,DKK2,DKK3,F2RL1,FOS,FZD1,FZD2,FZD8,ICAM1,Ighg2b,IGKC,IL17RB,IL18R1,IL1A,IL1RL2,IL1RN,IL33,IL6,MAP2K6,MMP3,MRAS,NFATC1,NFATC2,NGFR,PDGFB,PGF,PIK3R1,PIK3R3,PLCB1,PLCB4,PLCH1,PLCH2,PLCL1,PLCL2,PPP3CC,PRKCG,PRKCH,PRKCI,PRKCZ,PRKD1,PRSS3,SFRP1,SFRP2,Tcf7,TCF7L1,TNF,TNFRSF11B,TNFSF13B,TRAF1,TRAF3,VCAM1,WIF1,WNT10A,WNT11,WNT3A,WNT4,WNT5A,WNT6,WNT7A
Hepatic Fibrosis / Hepatic Stellate Cell Activation	8.01	0.227	#NUM!	A2M,ACTA2,BAMBI,CCN2,COL10A1,COL11A1,COL12A1,COL13A1,Col17a1,COL18A1,COL1A1,COL1A2,COL23A1,COL24A1,COL27A1,COL4A5,COL4A6,COL5A1,COL5A2,COL8A2,ECE1,EDNRB,FGFR2,ICAM1,IGFBP3,IGFBP4,IGFBP5,IL1A,IL1RL2,IL6,LEPR,MYH14,MYL7,MYL9,MYO18B,MYO5C,NGFR,PDGFB,PGF,REL,TIMP2,TNF,TNFRSF11B,VCAM1
Role of Osteoblasts, Osteoclasts and Chondrocytes in Rheumatoid Arthritis	7.38	0.21	#NUM!	ADAMTS5,ALPL,APC2,BMP2,BMP3,BMP6,BMPR1B,CALML5,COL1A1,CTSK,DKK2,DKK3,FOS,FZD1,FZD2,FZD8,IL18R1,IL1A,IL1RL2,IL1RN,IL33,IL6,MAP2K6,MAPK12,MMP3,Naip1 (includes others),NFATC1,NFATC2,NGFR,PIK3R1,PIK3R3,PPP3CC,SFRP1,SFRP2,SMAD6,Tcf7,TCF7L1,TNF,TNFRSF11B,WIF1,WNT10A,WNT11,WNT3A,WNT4,WNT5A,WNT6,WNT7A
Xenobiotic Metabolism Signaling	6.93	0.19	#NUM!	ALDH1A3,ALDH2,ALDH3A1,ALDH5A1,CAMK1,CAMK2B,CHST1,CHST11,CHST15,CHST3,CYP1B1,CYP3A5,GRIP1,GSTA5,GSTM5,GSTO1,HS3ST1,HS3ST3A1,HS3ST3B1,HS3ST6,HS6ST2,IL1A,IL6,MAP2K6,MAP3K6,MAP3K9,MAPK12,MAPK13,MGST1,MRAS,NDST3,NQO1,NQO2,PIK3R1,PIK3R3,PPARGC1A,PPP2R1B,PPP2R2C,PPP2R5B,PRKCG,PRKCH,PRKCI,PRKCZ,PRKD1,REL,RXRA,SULT4A1,TNF,UGT1A1,UGT1A3,UGT1A4,UGT1A6,Ugt1a7c,UGT8,UST
Agranulocyte Adhesion and Diapedesis	5.86	0.196	#NUM!	2610528A11Rik,ACKR3,ACTA2,ACTG2,AOC3,C5,CCL24,CD34,CLDN1,CLDN3,CLDN4,CLDN6,CLDN7,CLDN8,CLDN9,Cxcl11,CXCL14,CXCL6,Cxcl9,GNAI1,HRH1,ICAM1,IL1A,IL1RN,IL33,ITGB7,MMP11,MMP15,MMP17,MMP3,MMP7,MSN,MYH14,MYL7,MYL9,MYO18B,MYO5C,Podxl,PODXL2,Ppbp,TNF,VCAM1
Molecular Mechanisms of Cancer	5.63	0.159	#NUM!	ADCY3,APC2,ARHGEF16,ARHGEF17,ARHGEF19,ARHGEF4,ARHGEF9,BBC3,BMP2,BMP3,BMP6,BMPR1B,CAMK2B,CCND1,CDH1,CDK14,CDKN2A,CDKN2B,E2F2,E2F6,FOS,FZD1,FZD2,FZD8,GNA11,GNA15,GNAI1,GNB4,GNG11,HDAC11,ITGA10,ITGA11,ITGA7,ITGAE,ITGB6,ITGB7,MAP2K6,MAPK12,MAPK13,MDM2,MRAS,Naip1 (includes others),PAK3,PAK6,PIK3R1,PIK3R3,PLCB1,PLCB4,PRKCG,PRKCH,PRKCI,PRKCZ,PRKD1,RAC3,RAPGEF3,RB1,RBPJ,REL,RHOU,RHOV,RND1,RND3,SMAD6,TP53…
Human Embryonic Stem Cell Pluripotency	5.29	0.205	#NUM!	APC2,BDNF,BMP2,BMP3,BMP6,BMPR1B,FGFR2,FZD1,FZD2,FZD8,GNA11,GNA15,GNAI1,GNB4,GNG11,MRAS,NTF4,NTRK3,PDGFB,PIK3R1,PIK3R3,S1PR5,SMAD6,SOX2,SPHK1,Tcf7,TCF7L1,WNT10A,WNT11,WNT3A,WNT4,WNT5A,WNT6,WNT7A
Tight Junction Signaling	4.61	0.191	#NUM!	ACTA2,ACTG2,CEBPA,CLDN1,CLDN3,CLDN4,CLDN6,CLDN7,CLDN8,CLDN9,FOS,MPDZ,MYH14,MYL7,MYL9,MYO18B,MYO5C,NAPB,NECTIN1,NECTIN3,NGFR,OCLN,PATJ,PPP2R1B,PPP2R2C,PPP2R5B,PRKCI,PRKCZ,REL,SNAP25,TIAM1,TJP3,TNF,TNFRSF11B
Granulocyte Adhesion and Diapedesis	4.43	0.185	#NUM!	2610528A11Rik,ACKR3,C5,CCL24,CLDN1,CLDN3,CLDN4,CLDN6,CLDN7,CLDN8,CLDN9,Cxcl11,CXCL14,CXCL6,Cxcl9,GNAI1,HRH1,ICAM1,IL1A,IL1RL2,IL1RN,IL33,MMP11,MMP15,MMP17,MMP3,MMP7,MSN,NGFR,Ppbp,SDC2,SDC3,TNF,TNFRSF11B,VCAM1
Sertoli Cell-Sertoli Cell Junction Signaling	4.35	0.18	#NUM!	A2M,ACTA2,ACTG2,CDH1,CLDN1,CLDN3,CLDN4,CLDN6,CLDN7,CLDN8,CLDN9,EPN3,ITGA10,ITGA11,ITGA7,ITGAE,ITGB6,ITGB7,JUP,MAP3K6,MAP3K9,MAPK12,MAPK13,MRAS,NECTIN1,NECTIN3,NOS1,OCLN,PRKG1,PRKG2,SPTBN2,TGFBR3,TJP3,TNF,TUBA3E,TUBB3,TUBB4A
Circadian Rhythm Signaling	4.15	0.165	#NUM!	ADCY3,ADRB1,BDNF,CACNA1G,CACNA1I,CACNA2D1,CACNA2D4,CACNB2,CACNG4,CAMK2B,FBXL21P,GNA11,GNA15,GNAI1,GNB4,GNG11,GRIA3,GRIN1,HLF,MAP2K6,MDM2,MRAS,NGFR,NOS1,NPR2,PLCB1,PLCB4,PLCH1,PLCH2,PLCL1,PLCL2,PRKAA2,PRKCG,PRKCH,PRKCI,PRKCZ,PRKD1,PRKG1,PRKG2,PTGDS,RORA,RORC,SOX15,VIPR2
Atherosclerosis Signaling	3.96	0.198	#NUM!	ALOX12,ALOX12B,Alox12e,ALOX15,COL10A1,COL18A1,COL1A1,COL1A2,F3,ICAM1,IL1A,IL1RN,IL33,IL6,LCAT,MMP3,PDGFB,PLA2G12A,PLA2G3,PLA2G4A,PLA2G4E,PLA2G4F,PLA2G5,REL,TNF,VCAM1
Cellular Effects of Sildenafil (Viagra)	3.79	0.188	#NUM!	ACTA2,ACTG2,ADCY3,CACNA2D1,CACNA2D4,CACNB2,CACNG4,CALML5,KCNH2,KCNN4,MYH14,MYL7,MYL9,MYO18B,MYO5C,NPR2,PDE3B,PDE4A,PLCB1,PLCB4,PLCH1,PLCH2,PLCL1,PLCL2,PRKG1,PRKG2,SLC4A11,SLC4A5
Gap Junction Signaling	3.33	0.167	#NUM!	ACTA2,ACTG2,ADCY3,ADRB1,CAV1,GJA1,GJB2,GJB6,GNAI1,GRIA3,LPAR1,MRAS,NPR2,PIK3R1,PIK3R3,PLCB1,PLCB4,PLCH1,PLCH2,PLCL1,PLCL2,PPP3CC,PRKCG,PRKCH,PRKCI,PRKCZ,PRKD1,PRKG1,PRKG2,SOX15,TUBA3E,TUBB3,TUBB4A
Virus Entry via Endocytic Pathways	3.01	0.192	#NUM!	ACTA2,ACTG2,AP1M2,CAV1,CXADR,DNM1,FLNC,HLA-A,HLA-E,ITGB6,ITGB7,MRAS,PIK3R1,PIK3R3,PRKCG,PRKCH,PRKCI,PRKCZ,PRKD1,RAC3
Glucocorticoid Receptor Signaling	2.73	0.127	#NUM!	A2M,AR,CAV1,CEBPA,DNAH10,ESR1,FKBP5,FOS,GJA1,HLA-A,HLA-E,HSPA1A/HSPA1B,HSPA2,ICAM1,IFNE,IFNLR1,IL12RB1,IL13RA1,IL13RA2,IL17RB,IL17RE,IL18R1,IL1A,IL1RL2,IL1RN,IL20RA,IL22RA1,IL2RG,IL31RA,IL6,KRT13,KRT14,KRT15,KRT16,KRT17,KRT18,KRT19,KRT23,KRT4,KRT5,KRT6B,KRT7,KRT78,KRT79,KRT8,MAPK12,MAPK13,MMP3,MRAS,NDUFA4,NDUFA4L2,NFATC1,NFATC2,PC,PCK2,PGR,PIK3R1,PIK3R3,PLA2G12A,PLA2G3,PLA2G4A,PLA2G4E,PLA2G4F,PLA…
Regulation of the Epithelial-Mesenchymal Transition Pathway	2.53	0.154	#NUM!	BCL9,CDH1,CLDN3,ESRP2,FGF11,FGF19,FGFR2,FZD1,FZD2,FZD8,JAG2,LOX,MAP2K6,MRAS,NOTCH3,PARD6B,PARD6G,PIK3R1,PIK3R3,RBPJ,REL,Tcf7,TCF7L1,WNT10A,WNT11,WNT3A,WNT4,WNT5A,WNT6,WNT7A
Hepatic Cholestasis	2.38	0.152	#NUM!	ADCY3,ATP8B1,CYP3A5,CYP7B1,Eda,ESR1,FGF19,HSD3B7,IL1A,IL1RL2,IL1RN,IL33,IL6,MAPK12,NGFR,NR1H4,PPARA,PRKCG,PRKCH,PRKCI,PRKCZ,PRKD1,REL,RXRA,SLCO3A1,TNF,TNFRSF11B,TNFSF10,TNFSF13B
MSP-RON Signaling Pathway	2.28	0.207	#NUM!	ACTA2,ACTG2,KLK11,KLK13,KLK14,KLKB1,MST1R,PIK3R1,PIK3R3,PRKCZ,RPS6KA2,TNF
Germ Cell-Sertoli Cell Junction Signaling	2.2	0.152	#NUM!	A2M,ACTA2,ACTG2,CDH1,EPN3,JUP,LIMK2,MAP2K6,MAP3K6,MAP3K9,MAPK12,MRAS,NECTIN3,PAK3,PAK6,PIK3R1,PIK3R3,RAC3,RHOU,RHOV,RND1,RND3,TNF,TUBA3E,TUBB3,TUBB4A
Protein Citrullination	2.19	0.6	#NUM!	PADI1,PADI3,PADI4
Semaphorin Signaling in Neurons	2.04	0.194	#NUM!	DPYSL2,DPYSL3,FES,LIMK2,PAK3,PAK6,PLXNB1,RAC3,RHOU,RHOV,RND1,RND3
FXR/RXR Activation	2.01	0.159	#NUM!	C3,FETUB,FGF19,FOXA1,FOXA3,G6PC3,IL1A,IL1RN,IL33,LCAT,MAPK12,NR1H4,PCK2,PPARA,PPARG,PPARGC1A,RXRA,SERPINF1,TNF,VLDLR
Caveolar-mediated Endocytosis Signaling	1.77	0.173	#NUM!	ACTA2,ACTG2,CAV1,DYRK3,FLNC,HLA-A,HLA-E,ITGA10,ITGA11,ITGA7,ITGAE,ITGB6,ITGB7
GABA Receptor Signaling	1.77	0.15	#NUM!	ADCY3,ALDH5A1,CACNA1G,CACNA1I,CACNA2D1,CACNA2D4,CACNB2,CACNG4,DNM1,GABRP,GAD2,GNA11,GNA15,GNAI1,GNB4,GNG11,KCNH2,KCNN4,MRAS,UBD
RAR Activation	1.74	0.137	#NUM!	ADCY3,Akr1c12/Akr1c13,AKR1C3,ALDH1A3,CRABP2,DHRS3,DHRS9,FOS,IGFBP3,MAPK12,MAPK13,PIK3R1,PIK3R3,PPARGC1A,PRKCG,PRKCH,PRKCI,PRKCZ,PRKD1,RBP1,RDH12,REL,RXRA,SDR9C7,SMAD6,SMARCA2,SORBS3,ZBTB16
Ceramide Biosynthesis	1.7	0.429	#NUM!	DEGS2,SPTLC3,SPTSSB
Mechanisms of Viral Exit from Host Cells	1.54	0.195	#NUM!	ACTA2,ACTG2,PRKCG,PRKCH,PRKCI,PRKCZ,PRKD1,SH3GL3
PXR/RXR Activation	1.51	0.169	#NUM!	Aldh1a7,CYP3A5,IL6,PAPSS2,PCK2,PPARA,PPARGC1A,RXRA,SCD,TNF,UGT1A1
FAK Signaling	1.45	0.145	#NUM!	ACTA2,ACTG2,CAPN11,CAPN2,CAPN5,CAPN6,ITGA10,ITGA11,ITGA7,ITGAE,ITGB6,ITGB7,MRAS,PAK3,PAK6,PIK3R1,PIK3R3
IL-12 Signaling and Production in Macrophages	1.41	0.14	#NUM!	ALOX12,ALOX15,FOS,IL12RB1,IL23R,MAPK12,MAPK13,MST1R,PIK3R1,PIK3R3,PPARG,PRKCG,PRKCH,PRKCI,PRKCZ,PRKD1,REL,RXRA,TNF
TR/RXR Activation	1.41	0.155	#NUM!	ADRB1,AKR1C3,ENO1,MDM2,ME1,PDE3B,PIK3R1,PIK3R3,PPARGC1A,RAB3B,RXRA,SLC16A3,THRB
G Protein Signaling Mediated by Tubby	1.37	0.182	#NUM!	GNA11,GNA15,GNAI1,GNB4,GNG11,MRAS,PLCB1,PLCB4
Spermine and Spermidine Degradation I	1.36	0.5	#NUM!	SAT1,SAT2
Phenylethylamine Degradation I	1.36	0.5	#NUM!	ALDH2,AOC3
Extrinsic Prothrombin Activation Pathway	1.29	0.25	#NUM!	F3,PROS1,TFPI,THBD
IL-17A Signaling in Fibroblasts	1.28	0.184	#NUM!	FOS,IL17RB,IL6,LCN2,MAPK12,MAPK13,REL
Ephrin A Signaling	1.23	0.17	#NUM!	EFNA3,EFNA4,EPHA1,EPHA3,EPHA7,NGFR,PIK3R1,PIK3R3
IL-10 Signaling	1.23	0.153	#NUM!	FOS,IL1A,IL1RL2,IL1RN,IL33,IL6,MAP2K6,MAPK12,MAPK13,REL,TNF
nNOS Signaling in Skeletal Muscle Cells	1.18	0.167	#NUM!	CACNA1G,CACNA1I,CACNA2D1,CACNA2D4,CACNB2,CACNG4,CALML5,NOS1
Role of MAPK Signaling in the Pathogenesis of Influenza	1.18	0.146	#NUM!	LCAT,MAP2K6,MAPK12,MAPK13,MRAS,PLA2G12A,PLA2G3,PLA2G4A,PLA2G4E,PLA2G4F,PLA2G5,TNF
Trans, trans-farnesyl Diphosphate Biosynthesis	1.16	0.4	#NUM!	FDPS,IDI1
Glutamate Degradation III (via 4-aminobutyrate)	1.16	0.4	#NUM!	ALDH5A1,GAD2
Ketogenesis	1.15	0.273	#NUM!	ACAT2,BDH1,HMGCLL1
Glutamate Receptor Signaling	1.13	0.152	#NUM!	CALML5,GNB4,GNG11,GRIA3,GRIK5,GRIN1,GRIP1,SLC1A1,SLC1A4,SLC1A7
Isoleucine Degradation I	1.13	0.222	#NUM!	ACAT2,BCAT1,ECHDC3,EHHADH
Glutamate Removal from Folates	1.04	1	#NUM!	GGH
Methylglyoxal Degradation VI	1.04	1	#NUM!	LDHD
Asparagine Biosynthesis I	1.04	1	#NUM!	ASNS
Sulfite Oxidation IV	1.04	1	#NUM!	SUOX
Chondroitin and Dermatan Biosynthesis	1.02	0.333	#NUM!	CHSY3,CSGALNACT1
Tryptophan Degradation to 2-amino-3-carboxymuconate Semialdehyde	1.02	0.333	#NUM!	AFMID,KYNU
Role of Tissue Factor in Cancer	0.987	0.129	#NUM!	CCN2,F2RL1,F3,GNA11,GNA15,LIMK2,MAPK12,MAPK13,MRAS,PIK3R1,PIK3R3,PLAUR,PLCB1,RPS6KA2,TP53
Chronic Myeloid Leukemia Signaling	0.979	0.131	#NUM!	CBLC,CCND1,CDKN2A,E2F2,E2F6,HDAC11,MDM2,MECOM,MRAS,PIK3R1,PIK3R3,RB1,REL,TP53
Adipogenesis pathway	0.979	0.126	#NUM!	BMP2,BMPR1B,CEBPA,DDIT3,EBF1,FGFR2,FZD1,FZD2,FZD8,HDAC11,PPARG,RB1,RBP1,SLC2A4,TNF,TP53,WNT5A
NAD biosynthesis II (from tryptophan)	0.971	0.231	#NUM!	AFMID,KYNU,NMNAT2
Oleate Biosynthesis II (Animals)	0.971	0.231	#NUM!	FADS1,FADS2,SCD
Androgen Biosynthesis	0.932	0.19	#NUM!	AKR1C3,Gsta4,GSTA5,HSD3B7
NAD Salvage Pathway III	0.896	0.286	#NUM!	NMNAT2,NMRK1
Mevalonate Pathway I	0.893	0.214	#NUM!	ACAT2,IDI1,MVD
Mineralocorticoid Biosynthesis	0.893	0.214	#NUM!	Gsta4,GSTA5,HSD3B7
Role of IL-17A in Arthritis	0.848	0.14	#NUM!	CXCL6,IL17RB,MAP2K6,MAPK12,MAPK13,PIK3R1,PIK3R3,REL
Glucocorticoid Biosynthesis	0.824	0.2	#NUM!	Gsta4,GSTA5,HSD3B7
Vitamin-C Transport	0.821	0.174	#NUM!	GJB2,GSTO1,LRRC8E,SLC2A4
TNFR2 Signaling	0.796	0.156	#NUM!	FOS,Naip1 (includes others),REL,TNF,TRAF1
Superoxide Radicals Degradation	0.796	0.25	#NUM!	GPX7,NQO1
Asparagine Degradation I	0.762	0.5	#NUM!	ASRGL1
Spermine Biosynthesis	0.762	0.5	#NUM!	AMD1
Choline Degradation I	0.762	0.5	#NUM!	CHDH
L-cysteine Degradation III	0.762	0.5	#NUM!	GOT1
Spermidine Biosynthesis I	0.762	0.5	#NUM!	AMD1
Sulfate Activation for Sulfonation	0.762	0.5	#NUM!	PAPSS2
Glycine Degradation (Creatine Biosynthesis)	0.762	0.5	#NUM!	GATM
Putrescine Biosynthesis III	0.762	0.5	#NUM!	ODC1
Glutamate Dependent Acid Resistance	0.762	0.5	#NUM!	GAD2
Leucine Degradation I	0.712	0.222	#NUM!	BCAT1,HMGCLL1
Iron homeostasis signaling pathway	0.712	0.115	#NUM!	ATP6V0E2,ATP6V1C2,BMP2,BMP3,BMP6,BMPR1B,CP,CYBRD1,EPAS1,ERFE,GDF15,HEPH,IL6,PDGFB,SLC25A37,SLC39A14
Transcriptional Regulatory Network in Embryonic Stem Cells	0.666	0.13	#NUM!	CDYL,FOXC1,ISL1,L1CAM,OTX1,SOX2,TCF7L1
Bile Acid Biosynthesis, Neutral Pathway	0.656	0.167	#NUM!	Akr1c12/Akr1c13,AKR1C3,HSD3B7
Clathrin-mediated Endocytosis Signaling	0.654	0.109	#NUM!	ACTA2,ACTG2,AP1M2,DNM1,DNM3,EPHB2,FGF11,FGF19,ITGB6,ITGB7,MDM2,MYO1E,MYO6,PDGFB,PGF,PIK3R1,PIK3R3,PPP3CC,SH3GL3,STON2,UBD
NAD Salvage Pathway II	0.646	0.148	#NUM!	ENPP5,NMNAT2,NMRK1,NT5E
Embryonic Stem Cell Differentiation into Cardiac Lineages	0.642	0.2	#NUM!	ISL1,SOX2
Prostanoid Biosynthesis	0.642	0.2	#NUM!	CYP2S1,PTGDS
Calcium Transport I	0.642	0.2	#NUM!	ATP2B4,ATP2C2
Ketolysis	0.642	0.2	#NUM!	ACAT2,BDH1
Role of OCT4 in Mammalian Embryonic Stem Cell Pluripotency	0.627	0.13	#NUM!	FOXA1,IGF2BP1,JARID2,RB1,SOX2,TP53
γ-linolenate Biosynthesis II (Animals)	0.609	0.158	#NUM!	FADS1,FADS2,SLC27A1
Purine Nucleotides Degradation II (Aerobic)	0.609	0.158	#NUM!	ADA,GDA,NT5E
L-carnitine Biosynthesis	0.606	0.333	#NUM!	BBOX1
Uracil Degradation II (Reductive)	0.606	0.333	#NUM!	DPYD
1,25-dihydroxyvitamin D3 Biosynthesis	0.606	0.333	#NUM!	CYP2R1
Glutathione Biosynthesis	0.606	0.333	#NUM!	GCLM
Ascorbate Recycling (Cytosolic)	0.606	0.333	#NUM!	GSTO1
Thymine Degradation	0.606	0.333	#NUM!	DPYD
Anandamide Degradation	0.606	0.333	#NUM!	FAAH
Glutamate Degradation II	0.606	0.333	#NUM!	GOT1
Tyrosine Biosynthesis IV	0.606	0.333	#NUM!	PCBD1
4-aminobutyrate Degradation I	0.606	0.333	#NUM!	ALDH5A1
L-serine Degradation	0.606	0.333	#NUM!	SDSL
Aspartate Biosynthesis	0.606	0.333	#NUM!	GOT1
Docosahexaenoic Acid (DHA) Signaling	0.585	0.132	#NUM!	ALOX15,PIK3R1,PIK3R3,PNPLA2,SERPINF1
Remodeling of Epithelial Adherens Junctions	0.562	0.118	#NUM!	ACTA2,ACTG2,CDH1,DNM1,DNM3,TUBA3E,TUBB3,TUBB4A
Valine Degradation I	0.527	0.143	#NUM!	BCAT1,ECHDC3,EHHADH
Hematopoiesis from Multipotent Stem Cells	0.526	0.167	#NUM!	KITLG,THPO
Th1 and Th2 Activation Pathway	0.524	0.105	#NUM!	ACVR1B,GATA3,HLA-A,ICAM1,IL12RB1,IL17RB,IL18R1,IL2RG,IL33,IL6,JAG2,MAP2K6,NFATC1,NFATC2,NOTCH3,PIK3R1,PIK3R3,TGFBR3
Prostate Cancer Signaling	0.499	0.107	#NUM!	AR,CCND1,E2F2,E2F6,HDAC11,MDM2,MRAS,PIK3R1,PIK3R3,RB1,REL,TP53
Retinoate Biosynthesis II	0.499	0.25	#NUM!	RBP1
Arginine Degradation I (Arginase Pathway)	0.499	0.25	#NUM!	ARG1
L-cysteine Degradation I	0.499	0.25	#NUM!	GOT1
Phenylalanine Degradation I (Aerobic)	0.499	0.25	#NUM!	PCBD1
Acetate Conversion to Acetyl-CoA	0.499	0.25	#NUM!	ACSS1
Fatty Acid β-oxidation III (Unsaturated, Odd Number)	0.499	0.25	#NUM!	EHHADH
Guanosine Nucleotides Degradation III	0.478	0.154	#NUM!	GDA,NT5E
Cardiomyocyte Differentiation via BMP Receptors	0.458	0.13	#NUM!	BMP2,BMPR1B,SMAD6
Differential Regulation of Cytokine Production in Intestinal Epithelial Cells by IL-17A and IL-17F	0.458	0.13	#NUM!	IL1A,LCN2,TNF
Role of IL-17A in Psoriasis	0.435	0.143	#NUM!	CXCL6,IL17RB
Acyl-CoA Hydrolysis	0.435	0.143	#NUM!	ACOT2,ACOT4
Phenylalanine Degradation IV (Mammalian, via Side Chain)	0.435	0.143	#NUM!	ALDH2,GOT1
4-1BB Signaling in T Lymphocytes	0.428	0.118	#NUM!	MAPK12,MAPK13,REL,TRAF1
Inhibition of Angiogenesis by TSP1	0.428	0.118	#NUM!	MAPK12,MAPK13,SDC2,TP53
IL-22 Signaling	0.427	0.125	#NUM!	IL22RA1,MAPK12,MAPK13
Arsenate Detoxification I (Glutaredoxin)	0.421	0.2	#NUM!	GSTO1
Creatine-phosphate Biosynthesis	0.421	0.2	#NUM!	CKMT1A/CKMT1B
Tetrahydrofolate Salvage from 5,10-methenyltetrahydrofolate	0.421	0.2	#NUM!	MTHFD2
CMP-N-acetylneuraminate Biosynthesis I (Eukaryotes)	0.421	0.2	#NUM!	GNE
Myo-inositol Biosynthesis	0.421	0.2	#NUM!	ISYNA1
Citrulline-Nitric Oxide Cycle	0.421	0.2	#NUM!	NOS1
Role of IL-17F in Allergic Inflammatory Airway Diseases	0.41	0.111	#NUM!	CXCL6,IL17RB,IL6,REL,RPS6KA2
CSDE1 Signaling Pathway	0.399	0.107	#NUM!	AGO4,FOS,PIWIL2,PIWIL4,TNC,VIM
Role of JAK family kinases in IL-6-type Cytokine Signaling	0.399	0.12	#NUM!	IL6,MAPK12,MAPK13
CDP-diacylglycerol Biosynthesis I	0.399	0.12	#NUM!	CDS1,LPCAT1,MBOAT2
Superpathway of Citrulline Metabolism	0.397	0.133	#NUM!	ARG1,NOS1
Choline Biosynthesis III	0.397	0.133	#NUM!	GPLD1,PLD5
iNOS Signaling	0.371	0.106	#NUM!	CALML5,FOS,MAPK12,MAPK13,REL
Cancer Drug Resistance By Drug Efflux	0.364	0.103	#NUM!	FOXG1,MDM2,MRAS,PIK3R1,PIK3R3,TP53
Adenosine Nucleotides Degradation II	0.363	0.125	#NUM!	ADA,NT5E
Parkinson's Signaling	0.363	0.125	#NUM!	MAPK12,MAPK13
Urea Cycle	0.362	0.167	#NUM!	ARG1
Serotonin and Melatonin Biosynthesis	0.362	0.167	#NUM!	TPH1
Arginine Degradation VI (Arginase 2 Pathway)	0.362	0.167	#NUM!	ARG1
Glycerol Degradation I	0.362	0.167	#NUM!	GK5
Zymosterol Biosynthesis	0.362	0.167	#NUM!	NSDHL
NAD Biosynthesis III	0.362	0.167	#NUM!	NMNAT2
Aspartate Degradation II	0.362	0.167	#NUM!	GOT1
GDP-mannose Biosynthesis	0.362	0.167	#NUM!	GMPPB
TWEAK Signaling	0.361	0.108	#NUM!	Naip1 (includes others),REL,TRAF1,TRAF3
Phosphatidylglycerol Biosynthesis II (Non-plastidic)	0.348	0.111	#NUM!	CDS1,LPCAT1,MBOAT2
Glycolysis I	0.348	0.111	#NUM!	ALDOC,ENO1,ENO3
1D-myo-inositol Hexakisphosphate Biosynthesis II (Mammalian)	0.333	0.118	#NUM!	INPP5J,ITPKB
D-myo-inositol (1,3,4)-trisphosphate Biosynthesis	0.333	0.118	#NUM!	INPP5J,ITPKB
IL-4 Signaling	0.326	0.0968	#NUM!	HLA-A,IL13RA1,IL2RG,INPP5J,MRAS,NFATC1,NFATC2,PIK3R1,PIK3R3
NAD Biosynthesis from 2-amino-3-carboxymuconate Semialdehyde	0.313	0.143	#NUM!	NMNAT2
Phosphatidylcholine Biosynthesis I	0.313	0.143	#NUM!	CHKA
Adenine and Adenosine Salvage III	0.313	0.143	#NUM!	ADA
Differential Regulation of Cytokine Production in Macrophages and T Helper Cells by IL-17A and IL-17F	0.305	0.111	#NUM!	IL6,TNF
Sonic Hedgehog Signaling	0.304	0.103	#NUM!	GLI3,GLIS2,HHIP
Airway Pathology in Chronic Obstructive Pulmonary Disease	0.292	0.0932	#NUM!	Eda,FGF11,FGF19,IL1A,IL33,IL6,LCN2,PTGDS,TNF,TNFSF10,TNFSF13B
Mitochondrial L-carnitine Shuttle Pathway	0.28	0.105	#NUM!	CPT1C,SLC27A1
DNA damage-induced 14-3-3σ Signaling	0.28	0.105	#NUM!	SFN,TP53
Inositol Pyrophosphates Biosynthesis	0.273	0.125	#NUM!	IP6K3
Purine Ribonucleosides Degradation to Ribose-1-phosphate	0.273	0.125	#NUM!	ADA
Sphingomyelin Metabolism	0.273	0.125	#NUM!	SMPD3
Role of Cytokines in Mediating Communication between Immune Cells	0.26	0.0926	#NUM!	IL1A,IL1RN,IL33,IL6,TNF
GADD45 Signaling	0.257	0.1	#NUM!	CCND1,TP53
Oncostatin M Signaling	0.255	0.093	#NUM!	EPAS1,MMP3,MRAS,TIMP3
Phosphatidylethanolamine Biosynthesis II	0.24	0.111	#NUM!	CHKA
Citrulline Biosynthesis	0.24	0.111	#NUM!	ARG1
Folate Transformations I	0.24	0.111	#NUM!	MTHFD2
Endoplasmic Reticulum Stress Pathway	0.237	0.0952	#NUM!	ATF6,DDIT3
Superpathway of D-myo-inositol (1,4,5)-trisphosphate Metabolism	0.218	0.0909	#NUM!	INPP5J,ITPKB
Glycine Betaine Degradation	0.212	0.1	#NUM!	SDSL
Sucrose Degradation V (Mammalian)	0.188	0.0909	#NUM!	ALDOC
Purine Nucleotides De Novo Biosynthesis II	0.188	0.0909	#NUM!	ADSS1
Mitochondrial Dysfunction	0	0.0468	#NUM!	BACE2,COX6A2,CPT1C,GPX7,LRRK2,MAPK12,NDUFA4,NDUFA4L2
Role of RIG1-like Receptors in Antiviral Innate Immunity	0	0.0435	#NUM!	REL,TRAF3
Cytotoxic T Lymphocyte-mediated Apoptosis of Target Cells	0	0.00471	#NUM!	HLA-A,HLA-E
CTLA4 Signaling in Cytotoxic T Lymphocytes	0	0.0188	#NUM!	AP1M2,HLA-A,HLA-E,PIK3R1,PIK3R3,PPP2R1B,PPP2R2C,PPP2R5B,PTPN22
Airway Inflammation in Asthma	0	0.0303	#NUM!	IL33
T Helper Cell Differentiation	0	0.0234	#NUM!	GATA3,HLA-A,IL12RB1,IL18R1,IL23R,IL2RG,IL6,NGFR,RORC,TNF,TNFRSF11B
Lipid Antigen Presentation by CD1	0	0.0024	#NUM!	CD1D
Mitotic Roles of Polo-Like Kinase	0	0.0455	#NUM!	PPP2R1B,PPP2R2C,PPP2R5B
Maturity Onset Diabetes of Young (MODY) Signaling	0	0.0641	#NUM!	CACNA2D1,CACNA2D4,CACNB2,CACNG4,PDX1
DNA Methylation and Transcriptional Repression Signaling	0	0.0286	#NUM!	DNMT3B
Primary Immunodeficiency Signaling	0	0.0714	#NUM!	ADA,Ighg2b,IGKC,IL2RG
Allograft Rejection Signaling	0	0.0103	#NUM!	HLA-A,HLA-E,Ighg2b,IGKC,TNF
Autoimmune Thyroid Disease Signaling	0	0.00881	#NUM!	HLA-A,HLA-E,Ighg2b,IGKC
Graft-versus-Host Disease Signaling	0	0.0157	#NUM!	HLA-A,HLA-E,IL1A,IL1RN,IL33,IL6,TNF
Communication between Innate and Adaptive Immune Cells	0	0.0118	#NUM!	HLA-A,HLA-E,Ighg2b,Ighg2c,IGKC,IL1A,IL1RN,IL33,IL6,TNF,TNFSF13B
Systemic Lupus Erythematosus Signaling	0	0.0273	#NUM!	C5,FOS,HLA-A,HLA-E,Ighg2b,IGKC,IL1A,IL1RN,IL33,IL6,MRAS,NFATC1,NFATC2,PIK3R1,PIK3R3,TNF,TNFSF13B
Hereditary Breast Cancer Signaling	0	0.0704	#NUM!	CCND1,HDAC11,MRAS,PIK3R1,PIK3R3,RB1,SFN,SMARCA2,TP53,UBD
Altered T Cell and B Cell Signaling in Rheumatoid Arthritis	0	0.0203	#NUM!	HLA-A,Ighg2b,IL1A,IL1RN,IL33,IL6,REL,TNF,TNFSF13B,TRAF3
B Cell Development	0	0.0682	#NUM!	HLA-A,Ighg2b,IGKC
Role of Lipids/Lipid Rafts in the Pathogenesis of Influenza	0	0.087	#NUM!	FDPS,IFNE
Antiproliferative Role of TOB in T Cell Signaling	0	0.00469	#NUM!	RB1,TOB1
OX40 Signaling Pathway	0	0.0104	#NUM!	HLA-A,HLA-E,MAPK12,REL,TRAF3
Tumoricidal Function of Hepatic Natural Killer Cells	0	0.0417	#NUM!	ICAM1
Cell Cycle Control of Chromosomal Replication	0	0.0179	#NUM!	CDK14
Assembly of RNA Polymerase II Complex	0	0.02	#NUM!	TAF9B
Role of JAK1, JAK2 and TYK2 in Interferon Signaling	0	0.0385	#NUM!	REL
Role of JAK1 and JAK3 in γc Cytokine Signaling	0	0.0725	#NUM!	FES,IL2RG,MRAS,PIK3R1,PIK3R3
Hematopoiesis from Pluripotent Stem Cells	0	0.0113	#NUM!	Ighg2b,IGKC,IL1A,IL6,KITLG
Fatty Acid Activation	0	0.0667	#NUM!	SLC27A1
Chondroitin Sulfate Degradation (Metazoa)	0	0.0625	#NUM!	ARSB
Ubiquinol-10 Biosynthesis (Eukaryotic)	0	0.0333	#NUM!	CYP7B1
Cholesterol Biosynthesis I	0	0.0769	#NUM!	NSDHL
Urate Biosynthesis/Inosine 5'-phosphate Degradation	0	0.0714	#NUM!	NT5E
TCA Cycle II (Eukaryotic)	0	0.0435	#NUM!	OGDHL
D-myo-inositol (1,4,5)-trisphosphate Degradation	0	0.0625	#NUM!	INPP5J
Colanic Acid Building Blocks Biosynthesis	0	0.0714	#NUM!	GMPPB
Cholesterol Biosynthesis II (via 24,25-dihydrolanosterol)	0	0.0769	#NUM!	NSDHL
Methylglyoxal Degradation III	0	0.069	#NUM!	Akr1c12/Akr1c13,AKR1C3
Cholesterol Biosynthesis III (via Desmosterol)	0	0.0769	#NUM!	NSDHL
Stearate Biosynthesis I (Animals)	0	0.0635	#NUM!	ACOT2,ACOT4,Akr1c12/Akr1c13,SLC27A1
Pregnenolone Biosynthesis	0	0.037	#NUM!	CYP7B1
Fatty Acid β-oxidation I	0	0.0833	#NUM!	ECHDC3,EHHADH,SLC27A1
Superpathway of Methionine Degradation	0	0.0526	#NUM!	GOT1,SUOX
Oxidative Phosphorylation	0	0.018	#NUM!	COX6A2,NDUFA4
BER (Base Excision Repair) Pathway	0	0.0682	#NUM!	CDKN2A,MAP2K6,TP53
Interferon Signaling	0	0.0556	#NUM!	IFIT1,ISG15
Protein Ubiquitination Pathway	0	0.04	#NUM!	CRYAB,DNAJC22,DNAJC28,HLA-A,HLA-E,HSPA1A/HSPA1B,HSPA2,MDM2,UBD,USP11,USP53
Antigen Presentation Pathway	0	0.0513	#NUM!	HLA-A,HLA-E
Serotonin Receptor Signaling	0	0.0889	#NUM!	ADCY3,PCBD1,SLC6A4,TPH1
Phototransduction Pathway	0	0.037	#NUM!	NPR2,SAG
Dopamine Receptor Signaling	0	0.0759	#NUM!	ADCY3,PCBD1,PPP1R14C,PPP2R1B,PPP2R2C,PPP2R5B
Phagosome Maturation	0	0.0881	#NUM!	ATP6V0E2,ATP6V1C2,CTSE,CTSK,HLA-A,HLA-E,NAPB,NOS1,NOX4,RAC3,SNAP25,TUBA3E,TUBB3,TUBB4A
Inflammasome pathway	0	0.05	#NUM!	PYCARD
NER (Nucleotide Excision Repair, Enhanced Pathway)	0	0.00971	#NUM!	POLK
FAT10 Signaling Pathway	0	0.0357	#NUM!	TNF,UBD
PFKFB4 Signaling Pathway	0	0.0435	#NUM!	MAP2K6,TP53
Breast Cancer Regulation by Stathmin1	3.27	0.132	5.128	ACKR3,ADGRB1,ADGRF1,ADGRF4,ADGRG2,ADGRG6,ADGRG7,ADGRL3,ADORA2B,ADRB1,ARHGEF16,ARHGEF17,ARHGEF19,ARHGEF4,ARHGEF9,AVPR1A,BMP6,CAMK1,CAMK2B,CCND1,CELSR1,CELSR2,E2F2,E2F6,EDNRB,F2RL1,FZD1,FZD2,FZD8,GNB4,GNG11,GPR132,GPR137B,GPR146,GPR160,GPR161,GPR176,GPR27,GPR63,GPR84,GPR87,GPRC5C,HRH1,LGR4,LPAR1,LTB4R,MRAS,NPBWR1,NPY1R,P2RY1,PDGFB,PGF,PIK3R1,PIK3R3,PLCB1,PLCB4,PPP1R14C,PPP2R1B,PPP2R2C,PPP2R5B,PRKCG…
CREB Signaling in Neurons	3.82	0.136	4.756	ACKR3,ADCY3,ADGRB1,ADGRF1,ADGRF4,ADGRG2,ADGRG6,ADGRG7,ADGRL3,ADORA2B,ADRB1,AVPR1A,BMP6,BMPR1B,CACNA1G,CACNA1I,CACNA2D1,CACNA2D4,CACNB2,CACNG4,CALML5,CAMK2B,CELSR1,CELSR2,EDNRB,F2RL1,FGFR2,FZD1,FZD2,FZD8,GNA11,GNA15,GNAI1,GNB4,GNG11,GPR132,GPR137B,GPR146,GPR160,GPR161,GPR176,GPR27,GPR63,GPR84,GPR87,GPRC5C,GRIA3,GRIK5,GRIN1,HRH1,LGR4,LPAR1,LTB4R,MRAS,NGFR,NPBWR1,NPY1R,NTRK3,P2RY1,PDGFB,PIK3R1,PIK3R…
Phagosome Formation	4.11	0.135	4.17	ACKR3,ADGRB1,ADGRF1,ADGRF4,ADGRG2,ADGRG6,ADGRG7,ADGRL3,ADORA2B,ADRB1,AP1M2,AVPR1A,C3,CELSR1,CELSR2,COLEC12,EDNRB,ELMO3,F2RL1,FCAMR,FZD1,FZD2,FZD8,GPLD1,GPR132,GPR137B,GPR146,GPR160,GPR161,GPR176,GPR27,GPR63,GPR84,GPR87,GPRC5C,HRH1,Ighg2b,IGKC,ITGA10,ITGA11,ITGA7,ITGAE,ITGB6,ITGB7,LCAT,LGR4,LIMK2,LPAR1,LTB4R,MAP2K6,MAPK12,MRAS,MRC1,MRC2,MYH14,MYL7,MYL9,MYO18B,MYO5C,NPBWR1,NPY1R,P2RY1,PAK3,PAK6,PIK…
Gustation Pathway	1.54	0.133	4.041	ADCY3,ASIC1,CACNA1G,CACNA1I,CACNA2D1,CACNA2D4,CACNB2,CACNG4,ENTPD2,GABRP,KCNH2,KCNN4,LIPH,LIPK,LIPM,LIPN,LRRC8E,P2RX5,P2RY1,PDE3B,SCN4B,SCN7A,SCN8A,SCNN1A,SCNN1B,SLC2A4,SLC5A1
GP6 Signaling Pathway	4.19	0.205	3.922	CALML5,COL10A1,COL11A1,COL12A1,COL13A1,Col17a1,COL18A1,COL1A1,COL1A2,COL23A1,COL24A1,COL27A1,COL4A5,COL4A6,COL5A1,COL5A2,COL8A2,LAMB3,LAMC2,PIK3R1,PIK3R3,PRKCG,PRKCH,PRKCI,PRKCZ,PRKD1
Pulmonary Fibrosis Idiopathic Signaling Pathway	10.7	0.212	3.881	ACTA2,ACTG2,ACVR1B,ADAMTS1,AREG,AXL,BBC3,CAV1,CCN2,CCND1,CDH1,COL10A1,COL11A1,COL12A1,COL13A1,Col17a1,COL18A1,COL1A1,COL1A2,COL23A1,COL24A1,COL27A1,COL4A5,COL4A6,COL5A1,COL5A2,COL8A2,EPHB3,FGFR2,FOS,FOXG1,FZD1,FZD2,FZD8,HES1,IL13RA1,IL6,ITGB6,JARID2,LPAR1,MAP2K6,MAPK12,MAPK13,MMP11,MMP15,MMP17,MMP3,MMP7,MRAS,NOTCH3,NOX4,PDGFB,PIK3R1,PIK3R3,RBPJ,REL,RPS6KA2,Tcf7,TCF7L1,TGFBR3,TP53,VIM,WNT10A,WNT11…
Cardiac Hypertrophy Signaling (Enhanced)	7.87	0.166	3.862	ACVR1B,ADCY3,ADRB1,ATF6,CACNA2D1,CACNA2D4,CACNB2,CACNG4,CALML5,CAMK2B,Eda,EDNRB,FGF11,FGF19,FGFR2,FZD1,FZD2,FZD8,GDE1,GDPD1,GNA11,GNA15,GNAI1,GNB4,GNG11,HDAC11,IFNLR1,IL12RB1,IL13RA1,IL13RA2,IL17RB,IL17RE,IL18R1,IL1A,IL1RL2,IL20RA,IL22RA1,IL2RG,IL31RA,IL33,IL6,ITGA10,ITGA11,ITGA7,ITGAE,ITGB6,ITGB7,MAP2K6,MAP3K6,MAP3K9,MAPK12,MAPK13,MPPED2,MRAS,NFATC1,NFATC2,NGFR,PDE3B,PDE4A,PDE7A,PDE9A,PIK3R1,PIK…
G-Protein Coupled Receptor Signaling	3.69	0.131	3.753	ACKR3,ADCY3,ADGRB1,ADGRF1,ADGRF4,ADGRG2,ADGRG6,ADGRG7,ADGRL3,ADORA2B,ADRB1,AVPR1A,CALML5,CAMK2B,CARD10,CCND1,CELSR1,CELSR2,DUSP9,EDNRB,EYA2,F2RL1,FOS,FOXG1,FZD1,FZD2,FZD8,GDE1,GDPD1,GNA11,GNA15,GNAI1,GNB4,GNG11,GPR132,GPR137B,GPR146,GPR160,GPR161,GPR176,GPR27,GPR63,GPR84,GPR87,GPRC5C,HCN2,HRH1,KCNH2,KCNN4,LGR4,LPAR1,LTB4R,MAP2K6,MAP3K6,MAP3K9,MAPK12,MAPK13,MEGF6,MPPED2,MRAS,MYL7,MYL9,NFATC1,NFATC…
Wound Healing Signaling Pathway	6.59	0.194	3.286	ACTA2,ACVR1B,Cma2/Mcpt9,COL10A1,COL11A1,COL12A1,COL13A1,Col17a1,COL18A1,COL1A1,COL1A2,COL23A1,COL24A1,COL27A1,COL4A5,COL4A6,COL5A1,COL5A2,COL8A2,Eda,FGFR2,FOS,IL1A,IL1RL2,IL1RN,IL33,IL6,KRT16,KRT17,KRT6B,LAMB3,LAMC2,MAP2K6,MAPK12,Mcpt1,Mcpt2,Mcpt8,MRAS,MST1R,NGFR,PDGFB,PGF,TGFBR3,TNF,TNFRSF11B,TNFSF10,TNFSF13B,TRPA1,VIM
Oxytocin Signaling Pathway	4.92	0.172	3.175	ATP2B4,CACNA2D1,CACNA2D4,CACNB2,CACNG4,CALML5,FOS,GJA1,GNA11,GNAI1,GNB4,GNG11,IL6,MAPK12,MAPK13,MRAS,MYH14,MYL7,MYL9,MYO18B,MYO5C,NFATC1,NPR2,PIK3R1,PIK3R3,PLA2G12A,PLA2G3,PLA2G4A,PLA2G4E,PLA2G4F,PLA2G5,PLCB1,PLCB4,PNPLA2,PPARA,PPARG,PPP3CC,PRKAA2,PRKCG,PRKCH,PRKCI,PRKCZ,PRKD1,PRKG1,PRKG2,PTGFR,REL,SOX15
Role of Hypercytokinemia/hyperchemokinemia in the Pathogenesis of Influenza	0.599	0.116	3.162	AREG,IFNLR1,IL1A,IL1RN,IL33,IL6,ISG15,OAS2,PYCARD,TNF
GPCR-Mediated Nutrient Sensing in Enteroendocrine Cells	3.45	0.195	3.128	ADCY3,CACNA1G,CACNA1I,CACNA2D1,CACNA2D4,CACNB2,CACNG4,CCK,GNA11,GNA15,GNAI1,GNG11,PLCB1,PLCB4,PLCH1,PLCH2,PLCL1,PLCL2,PRKCG,PRKCH,PRKCI,PRKCZ,PRKD1
Signaling by Rho Family GTPases	4.72	0.172	2.921	ACTA2,ACTG2,ARHGEF16,ARHGEF17,ARHGEF19,ARHGEF4,ARHGEF9,CDH1,CDH11,CDH3,DES,FOS,GNA11,GNA15,GNAI1,GNB4,GNG11,ITGA10,ITGA11,ITGA7,ITGAE,ITGB6,ITGB7,LIMK2,MAP3K9,MAPK12,MRAS,MSN,MYL7,MYL9,NOX4,PAK3,PAK6,PIK3R1,PIK3R3,PIP4K2A,PRKCI,PRKCZ,RAC3,REL,RHOU,RHOV,RND1,RND3,VIM,WASF1
Insulin Secretion Signaling Pathway	1.9	0.133	2.921	ADCY3,AGO4,ASIC1,CACNA1G,CACNA1I,CACNA2D1,CACNA2D4,CACNB2,CACNG4,CAMK2B,CCK,GNA11,GNA15,KCNA4,MAPK12,MAPK13,NAPB,PC,PDX1,PIK3R1,PIK3R3,PLCB1,PLCB4,PLCH1,PLCH2,PLCL1,PLCL2,PRKCG,PRKCH,PRKCI,PRKCZ,PRKD1,SCNN1A,SCNN1B,SLC2A4,SNAP25
Xenobiotic Metabolism General Signaling Pathway	4.11	0.196	2.887	GSTA5,GSTM5,GSTO1,MAP2K6,MAP3K6,MAP3K9,MAPK12,MAPK13,MGST1,MRAS,NQO1,NQO2,NR1H4,PIK3R1,PIK3R3,PPARA,PRKCG,PRKCH,PRKCI,PRKCZ,PRKD1,RXRA,UGT1A1,UGT1A3,UGT1A4,UGT1A6,Ugt1a7c,UGT8
Dermatan Sulfate Biosynthesis	3.63	0.25	2.84	CHST1,CHST11,CHST15,CHST3,CHSY3,CSGALNACT1,DSE,HS3ST1,HS3ST3A1,HS3ST3B1,HS3ST6,HS6ST2,NDST3,SULT4A1,UST
Androgen Signaling	1.49	0.136	2.84	AR,CACNA1G,CACNA1I,CACNA2D1,CACNA2D4,CACNB2,CACNG4,CALML5,CCND1,GNA11,GNA15,GNAI1,GNB4,GNG11,MRAS,PRKCG,PRKCH,PRKCI,PRKCZ,PRKD1,REL,TAF9B,TGFB1I1
Xenobiotic Metabolism PXR Signaling Pathway	5	0.192	2.795	ALDH1A3,ALDH2,ALDH3A1,ALDH5A1,CAMK2B,CHST1,CHST11,CHST15,CHST3,CYP3A5,GRIP1,GSTA5,GSTM5,GSTO1,HS3ST1,HS3ST3A1,HS3ST3B1,HS3ST6,HS6ST2,MGST1,NDST3,PPARGC1A,PPP1R14C,PRKCG,PRKCH,PRKCI,PRKCZ,PRKD1,RXRA,SULT4A1,UGT1A1,UGT1A3,UGT1A4,UGT1A6,Ugt1a7c,UGT8,UST
Hepatic Fibrosis Signaling Pathway	7.02	0.172	2.782	ACTA2,ACVR1B,APC2,BAMBI,CACNA2D1,CACNA2D4,CACNB2,CACNG4,CALML5,CCN2,CCND1,COL10A1,COL18A1,COL1A1,COL1A2,FOS,FZD1,FZD2,FZD8,GLI3,GLIS2,GNAI1,ICAM1,IL1A,IL1RL2,IL1RN,IL33,ITGA10,ITGA11,ITGA7,ITGAE,ITGB6,ITGB7,LEPR,MAP2K6,MAPK12,MAPK13,MRAS,MYL7,MYL9,NGFR,NOX4,PDCD4,PDGFB,PGF,PIK3R1,PIK3R3,PPARG,PRKCG,PRKCH,PRKCI,PRKCZ,PRKD1,RAC3,REL,RHOU,RHOV,RND1,RND3,Tcf7,TCF7L1,TGFBR3,TNF,TNFRSF11B,VCAM1,WNT10A,…
Colorectal Cancer Metastasis Signaling	3.09	0.151	2.744	ADCY3,CCND1,CDH1,FOS,FZD1,FZD2,FZD8,GNA11,GNA15,GNAI1,GNB4,GNG11,IL6,MAPK12,MMP11,MMP15,MMP17,MMP3,MMP7,MRAS,PGF,PIK3R1,PIK3R3,PTGER4,RAC3,REL,RHOU,RHOV,RND1,RND3,Tcf7,TCF7L1,TNF,TP53,WNT10A,WNT11,WNT3A,WNT4,WNT5A,WNT6,WNT7A
Fcγ Receptor-mediated Phagocytosis in Macrophages and Monocytes	0.842	0.128	2.714	ACTA2,ACTG2,GPLD1,PIK3R1,PIK3R3,PLD5,PRKCG,PRKCH,PRKCI,PRKCZ,PRKD1,RAC3
Adrenomedullin signaling pathway	3.29	0.166	2.694	ADCY3,C3,CALML5,FOS,GNA11,GNA15,IL1A,IL1RN,IL33,KCNH2,KCNN4,MAP2K6,MAPK12,MAPK13,MRAS,NPR2,PIK3R1,PIK3R3,PLCB1,PLCB4,PLCH1,PLCH2,PLCL1,PLCL2,PPARG,PRKG1,PRKG2,RAMP3,REL,RXRA,SOX15,TFAP2C,TNF
Dendritic Cell Maturation	0	0.0542	2.694	CD1D,COL10A1,COL18A1,COL1A1,COL1A2,DDR2,FSCN1,HLA-A,HLA-E,ICAM1,Ighg2b,IGKC,IL1A,IL1RL2,IL1RN,IL33,IL6,LEPR,MAPK12,MAPK13,NGFR,PIK3R1,PIK3R3,PLCB1,PLCB4,PLCH1,PLCH2,PLCL1,PLCL2,REL,TNF,TNFRSF11B
Chondroitin Sulfate Biosynthesis (Late Stages)	4	0.28	2.673	CHST1,CHST11,CHST15,CHST3,CHSY3,CSGALNACT1,HS3ST1,HS3ST3A1,HS3ST3B1,HS3ST6,HS6ST2,NDST3,SULT4A1,UST
Chondroitin Sulfate Biosynthesis	3.26	0.241	2.673	CHST1,CHST11,CHST15,CHST3,CHSY3,CSGALNACT1,HS3ST1,HS3ST3A1,HS3ST3B1,HS3ST6,HS6ST2,NDST3,SULT4A1,UST
Mouse Embryonic Stem Cell Pluripotency	1.31	0.144	2.673	APC2,FZD1,FZD2,FZD8,LIFR,MAPK12,MAPK13,MRAS,PIK3R1,PIK3R3,SOX2,Tcf7,TCF7L1,TP53,WNT3A
IL-6 Signaling	1.39	0.141	2.668	A2M,COL1A1,FOS,IL1A,IL1RL2,IL1RN,IL33,IL6,MAP2K6,MAPK12,MAPK13,MRAS,NGFR,PIK3R1,PIK3R3,REL,TNF,TNFRSF11B
G Beta Gamma Signaling	1.36	0.14	2.668	CACNA1G,CACNA1I,CACNA2D1,CACNA2D4,CACNB2,CACNG4,CAV1,GNA11,GNA15,GNAI1,GNB4,GNG11,MRAS,PRKCG,PRKCH,PRKCI,PRKCZ,PRKD1
Synaptic Long Term Depression	4.89	0.19	2.667	CACNA1G,CACNA1I,CACNA2D1,CACNA2D4,CACNB2,CACNG4,GNA11,GNA15,GNAI1,GRIA3,LCAT,MRAS,NOS1,NPR2,PLA2G12A,PLA2G3,PLA2G4A,PLA2G4E,PLA2G4F,PLA2G5,PLCB1,PLCB4,PLCH1,PLCH2,PLCL1,PLCL2,PPP2R1B,PPP2R2C,PPP2R5B,PRKCG,PRKCH,PRKCI,PRKCZ,PRKD1,PRKG1,PRKG2,SOX15
Estrogen Receptor Signaling	1.78	0.123	2.655	ADCY3,CACNA2D1,CACNA2D4,CACNB2,CACNG4,CAV1,CCND1,ESR1,ESR2,FBXO32,FOS,FOXA1,FOXG1,GNA11,GNA15,GNAI1,GNB4,GNG11,HES1,LEPR,LIMK2,MMP11,MMP15,MMP17,MMP3,MMP7,MRAS,MYL7,MYL9,NDUFA4,NDUFA4L2,PGF,PGR,PIK3R1,PIK3R3,PLCB1,PLCB4,PLCH1,PLCH2,PLCL1,PLCL2,PPARGC1A,PRKAA2,PRKCG,PRKCH,PRKCI,PRKCZ,PRKD1,REL,TP53
Factors Promoting Cardiogenesis in Vertebrates	6.27	0.225	2.611	ACVR1B,APC2,BMP2,BMP3,BMP6,BMPR1B,CAMK2B,CCND1,FZD1,FZD2,FZD8,MAPK12,NOX4,PLCB1,PLCB4,PLCH1,PLCH2,PLCL1,PLCL2,PRKCG,PRKCH,PRKCI,PRKCZ,PRKD1,Tcf7,TCF7L1,TGFBR3,WNT10A,WNT11,WNT3A,WNT4,WNT5A,WNT6,WNT7A
Leukocyte Extravasation Signaling	3.21	0.166	2.6	ACTA2,ACTG2,ARHGAP6,CLDN1,CLDN3,CLDN4,CLDN6,CLDN7,CLDN8,CLDN9,EDIL3,GNAI1,ICAM1,MAPK12,MAPK13,MMP11,MMP15,MMP17,MMP3,MMP7,MSN,PIK3R1,PIK3R3,PRKCG,PRKCH,PRKCI,PRKCZ,PRKD1,RAPGEF3,TIMP2,TIMP3,VCAM1
cAMP-mediated signaling	0.947	0.116	2.6	ADCY3,ADORA2B,ADRB1,AKAP6,CALML5,CAMK1,CAMK2B,DUSP9,GDE1,GDPD1,GNAI1,LPAR1,LTB4R,MPPED2,NPY1R,PDE3B,PDE4A,PDE7A,PDE9A,PKIA,PPP3CC,PTGER4,PTH1R,RAPGEF3,SMPDL3A,VIPR1,VIPR2
White Adipose Tissue Browning Pathway	2.26	0.162	2.558	ADCY3,BDNF,CACNA1G,CACNA1I,CACNA2D1,CACNA2D4,CACNB2,CACNG4,FGFR2,LDHD,MAPK12,MAPK13,PPARA,PPARG,PPARGC1A,PRDM16,PRKAA2,PRKG1,PRKG2,RXRA,THRB,VGF
Cholecystokinin/Gastrin-mediated Signaling	2.64	0.176	2.524	CCK,FOS,IL1A,IL1RN,IL33,MAP2K6,MAPK12,MRAS,PLCB1,PLCB4,PRKCG,PRKCH,PRKCI,PRKCZ,PRKD1,RAC3,RHOU,RHOV,RND1,RND3,TNF
Neuroprotective Role of THOP1 in Alzheimer's Disease	2.96	0.183	2.5	C1R,ECE1,ECE2,HGFAC,HLA-A,HLA-E,HTRA1,KLK11,PRSS12,PRSS16,PRSS22,PRSS27,PRSS3,Prss32,PRSS8,ST14,TMPRSS11A,Tmprss11b,TMPRSS11D,TMPRSS11E,TMPRSS2,TMPRSS4
Dermatan Sulfate Biosynthesis (Late Stages)	3.69	0.277	2.496	CHST1,CHST11,CHST15,CHST3,DSE,HS3ST1,HS3ST3A1,HS3ST3B1,HS3ST6,HS6ST2,NDST3,SULT4A1,UST
MSP-RON Signaling In Macrophages Pathway	0.757	0.12	2.496	ARG1,FOS,KLK11,KLK13,KLK14,KLKB1,MRAS,MST1R,PIK3R1,PIK3R3,PRKCZ,REL,ST14,TNF
HOTAIR Regulatory Pathway	5.04	0.202	2.475	AGO4,AR,CDH1,COL1A1,COL1A2,DNMT3B,ESR1,ESR2,FOXA1,HOXD10,ICAM1,JARID2,MDM2,MMP11,MMP15,MMP17,MMP3,MMP7,PIK3R1,PIK3R3,RBM38,REL,Tcf7,TCF7L1,VIM,WIF1,WNT10A,WNT11,WNT3A,WNT4,WNT5A,WNT6,WNT7A
Endothelin-1 Signaling	4.66	0.188	2.475	ADCY3,CASP14,ECE1,ECE2,EDNRB,FOS,GNA11,GNA15,GNAI1,GPLD1,LCAT,MAPK12,MAPK13,MRAS,NOS1,NPR2,PIK3R1,PIK3R3,PLA2G12A,PLA2G3,PLA2G4A,PLA2G4E,PLA2G4F,PLA2G5,PLCB1,PLCB4,PLCH1,PLCH2,PLCL1,PLCL2,PLD5,PRKCG,PRKCH,PRKCI,PRKCZ,PRKD1
Role of NFAT in Cardiac Hypertrophy	2.75	0.153	2.475	ADCY3,CACNA1G,CACNA1I,CACNA2D1,CACNA2D4,CACNB2,CACNG4,CALML5,CAMK1,CAMK2B,GNAI1,GNB4,GNG11,HDAC11,IL6,MAP2K6,MAPK12,MAPK13,MRAS,PIK3R1,PIK3R3,PLCB1,PLCB4,PLCH1,PLCH2,PLCL1,PLCL2,PPP3CC,PRKCG,PRKCH,PRKCI,PRKCZ,PRKD1,SLC8A1
Opioid Signaling Pathway	1.92	0.133	2.475	ADCY3,CACNA1G,CACNA1I,CACNA2D1,CACNA2D4,CACNB2,CACNG4,CALML5,CAMK1,CAMK2B,FOS,GNA11,GNA15,GNAI1,GNB4,GNG11,GRIN1,MAP2K6,MAPK12,MRAS,NOS1,NPBWR1,PLCB1,PPP3CC,PRKCG,PRKCH,PRKCI,PRKCZ,PRKD1,RAC3,RGS11,RGS17,RGS20,RGS5,RPS6KA2,SCN7A,TCF7L1
HER-2 Signaling in Breast Cancer	0.742	0.11	2.449	AREG,CCND1,COX6A2,ELF3,ERBB3,FOS,IL1A,ITGB6,ITGB7,MDM2,MRAS,MTCL1,PARD6B,PARD6G,PGR,PIK3R1,PIK3R3,PRKCG,PRKCH,PRKCI,PRKCZ,PRKD1,RB1,REL,TP53
Xenobiotic Metabolism CAR Signaling Pathway	5.99	0.205	2.402	ALDH1A3,ALDH2,ALDH3A1,ALDH5A1,CHST1,CHST11,CHST15,CHST3,CYP3A5,GRIP1,GSTA5,GSTM5,GSTO1,HS3ST1,HS3ST3A1,HS3ST3B1,HS3ST6,HS6ST2,MAP2K6,MGST1,NDST3,PPARGC1A,PPP2R1B,PPP2R2C,PPP2R5B,PRKCG,PRKCH,PRKCI,PRKCZ,PRKD1,RXRA,SULT4A1,UGT1A1,UGT1A3,UGT1A4,UGT1A6,Ugt1a7c,UGT8,UST
IL-8 Signaling	2.56	0.152	2.353	ANGPT1,CCND1,CDH1,FOS,GNA11,GNA15,GNAI1,GNB4,GNG11,GPLD1,ICAM1,LIMK2,MAPK12,MRAS,MYL7,MYL9,NOX4,PGF,PIK3R1,PIK3R3,PLD5,PRKCG,PRKCH,PRKCI,PRKCZ,PRKD1,RAC3,RHOU,RHOV,RND1,RND3,VCAM1
Ephrin B Signaling	1.23	0.153	2.333	EFNB1,EPHB2,EPHB3,GNA11,GNA15,GNAI1,GNB4,GNG11,KALRN,MRAS,RAC3
Growth Hormone Signaling	1.97	0.183	2.309	A2M,CEBPA,FOS,IGFBP3,PIK3R1,PIK3R3,PRKCG,PRKCH,PRKCI,PRKCZ,PRKD1,RPS6KA2,SLC2A4
Role of Pattern Recognition Receptors in Recognition of Bacteria and Viruses	0.939	0.122	2.309	C3,C5,Eda,IL1A,IL33,IL6,MAPK12,OAS2,PIK3R1,PIK3R3,PRKCG,PRKCH,PRKCI,PRKCZ,PRKD1,REL,TNF,TNFSF10,TNFSF13B
RHOA Signaling	0.631	0.113	2.309	ACTA2,ACTG2,ARHGAP6,EPHA1,LIMK2,LPAR1,MSN,MYL7,MYL9,NRP2,PIP4K2A,PLEKHG5,RND3,WASF1
Gαq Signaling	3.17	0.171	2.294	AVPR1A,CALML5,GNA11,GNA15,GNAI1,GNB4,GNG11,GPLD1,HRH1,MRAS,NFATC1,NFATC2,PIK3R1,PIK3R3,PLCB1,PLCB4,PLD5,PPP3CC,PRKCG,PRKCH,PRKCI,PRKCZ,PRKD1,RAC3,REL,RHOU,RHOV,RND1,RND3
Endocannabinoid Neuronal Synapse Pathway	3.05	0.174	2.294	ADCY3,CACNA1G,CACNA1I,CACNA2D1,CACNA2D4,CACNB2,CACNG4,DAGLA,DNAH10,FAAH,GNA11,GNA15,GNAI1,GNB4,GNG11,GRIA3,GRIN1,MAPK12,MAPK13,PLCB1,PLCB4,PLCH1,PLCH2,PLCL1,PLCL2,PPP3CC
Cardiac Hypertrophy Signaling	1.92	0.135	2.268	ADCY3,ADRB1,CACNA2D1,CACNA2D4,CACNB2,CACNG4,CALML5,GNA11,GNA15,GNAI1,GNB4,GNG11,IL6,MAP2K6,MAP3K6,MAP3K9,MAPK12,MAPK13,MRAS,MYL7,MYL9,PIK3R1,PIK3R3,PLCB1,PLCB4,PLCH1,PLCH2,PLCL1,PLCL2,PPP3CC,RAC3,RHOU,RHOV,RND1,RND3
Neuroinflammation Signaling Pathway	1.2	0.117	2.263	ACVR1B,BACE2,BDNF,FOS,FZD1,GABRP,GAD2,GRIN1,HLA-A,HLA-E,ICAM1,IL34,IL6,MAPK12,MAPK13,MMP3,Naip1 (includes others),NFATC1,NFATC2,NOX4,PIK3R1,PIK3R3,PLA2G12A,PLA2G3,PLA2G4A,PLA2G4E,PLA2G4F,PLA2G5,PPP3CC,PRKCG,PYCARD,RAC3,REL,TGFBR3,TNF,TRAF3,VCAM1
D-myo-inositol (1,4,5)-Trisphosphate Biosynthesis	1.09	0.192	2.236	PIP4K2A,PLCB1,PLCB4,PLCH1,PLCH2
Superpathway of Cholesterol Biosynthesis	0.928	0.172	2.236	ACAT2,FDPS,IDI1,MVD,NSDHL
Melatonin Signaling	4.24	0.25	2.183	CALML5,CAMK2B,GNAI1,MAP2K6,PLCB1,PLCB4,PLCH1,PLCH2,PLCL1,PLCL2,PRKCG,PRKCH,PRKCI,PRKCZ,PRKD1,RORA,RORC,SLC2A4
fMLP Signaling in Neutrophils	2.46	0.168	2.183	CALML5,GNA11,GNA15,GNAI1,GNB4,GNG11,MRAS,NFATC1,NFATC2,NOX4,PIK3R1,PIK3R3,PLCB1,PLCB4,PPP3CC,PRKCG,PRKCH,PRKCI,PRKCZ,PRKD1,RAC3,REL
Aldosterone Signaling in Epithelial Cells	1.62	0.14	2.183	ASIC1,CRYAB,DNAJC22,DNAJC28,HSPA1A/HSPA1B,HSPA2,KCNMA1,PIK3R1,PIK3R3,PIP4K2A,PLCB1,PLCB4,PLCH1,PLCH2,PLCL1,PLCL2,PRKCG,PRKCH,PRKCI,PRKCZ,PRKD1,SCNN1A,SCNN1B
Basal Cell Carcinoma Signaling	5.39	0.278	2.138	APC2,BMP2,BMP3,BMP6,FZD1,FZD2,FZD8,GLI3,GLIS2,HHIP,Tcf7,TCF7L1,TP53,WNT10A,WNT11,WNT3A,WNT4,WNT5A,WNT6,WNT7A
PCP (Planar Cell Polarity) Pathway	3.63	0.25	2.138	CELSR1,CTHRC1,EFNB1,FZD1,FZD2,FZD8,LGR4,MAPK12,WNT10A,WNT11,WNT3A,WNT4,WNT5A,WNT6,WNT7A
Nitric Oxide Signaling in the Cardiovascular System	1.97	0.16	2.138	ADRB1,CACNA2D1,CACNA2D4,CACNB2,CACNG4,CALML5,CAV1,NPR2,PDE3B,PGF,PIK3R1,PIK3R3,PRKCG,PRKCH,PRKCI,PRKCZ,PRKD1,PRKG1,PRKG2
Role of NFAT in Regulation of the Immune Response	0	0.0306	2.138	CALML5,FOS,GNA11,GNA15,GNAI1,GNB4,GNG11,HLA-A,Ighg2b,MRAS,NFATC1,NFATC2,PIK3R1,PIK3R3,PLCB1,PLCB4,PPP3CC,REL
Apelin Cardiomyocyte Signaling Pathway	4.2	0.222	2.132	APLN,GNA11,GNAI1,MAPK12,MAPK13,MYL7,MYL9,PIK3R1,PIK3R3,PLCB1,PLCB4,PLCH1,PLCH2,PLCL1,PLCL2,PRKCG,PRKCH,PRKCI,PRKCZ,PRKD1,SLC8A1,SLC9A2
GNRH Signaling	3.01	0.163	2.132	ADCY3,CACNA1G,CACNA1I,CACNA2D1,CACNA2D4,CACNB2,CACNG4,CALML5,CAMK2B,FOS,GNA11,GNA15,GNAI1,GNB4,GNG11,MAP2K6,MAP3K6,MAP3K9,MAPK12,MAPK13,MRAS,PAK3,PAK6,PLCB1,PLCB4,PRKCG,PRKCH,PRKCI,PRKCZ,PRKD1,REL
Huntington's Disease Signaling	0.967	0.114	2.132	BDNF,CAPN11,CAPN2,CAPN5,CAPN6,CASP14,CPLX2,DNM1,DNM3,GNA11,GNA15,GNB4,GNG11,HAP1,HDAC11,HSPA1A/HSPA1B,HSPA2,NAPB,PIK3R1,PIK3R3,PLCB1,PLCB4,PRKCG,PRKCH,PRKCI,PRKCZ,PRKD1,SH3GL3,SNAP25,TAF9B,TP53,UBD
Relaxin Signaling	1.63	0.142	2.121	ADCY3,FOS,GDE1,GDPD1,GNA11,GNA15,GNAI1,GNB4,GNG11,MPPED2,MRAS,NPR2,PDE3B,PDE4A,PDE7A,PDE9A,PIK3R1,PIK3R3,PRKCZ,REL,SMPDL3A,SOX15
Thyroid Hormone Metabolism II (via Conjugation and/or Degradation)	1.6	0.2	2.121	CSGALNACT1,LARGE2,Sult1a1,UGT1A1,UGT1A3,UGT1A4,UGT1A6,Ugt1a7c
Phospholipase C Signaling	0	0.0679	2.121	ADCY3,ARHGEF16,ARHGEF17,ARHGEF19,ARHGEF4,ARHGEF9,CALML5,GNB4,GNG11,GPLD1,HDAC11,Ighg2b,IGKC,ITGA10,ITGA11,ITGA7,ITGAE,ITGB6,ITGB7,MRAS,MYL7,MYL9,NFATC1,NFATC2,PLA2G12A,PLA2G3,PLA2G4A,PLA2G4E,PLA2G4F,PLA2G5,PLCB1,PLCB4,PLD5,PPP3CC,PRKCG,PRKCH,PRKCI,PRKCZ,PRKD1,RAC3,RAPGEF3,REL,RHOU,RHOV,RND1,RND3
Role of WNT/GSK-3β Signaling in the Pathogenesis of Influenza	2	0.179	2.111	APC2,FZD1,FZD2,FZD8,IFNE,Tcf7,TCF7L1,WNT10A,WNT11,WNT3A,WNT4,WNT5A,WNT6,WNT7A
Xenobiotic Metabolism AHR Signaling Pathway	4.09	0.23	2.065	ALDH1A3,ALDH2,ALDH3A1,ALDH5A1,CYP1B1,GSTA5,GSTM5,GSTO1,IL1A,IL6,MGST1,NQO1,NQO2,REL,TNF,UGT1A1,UGT1A3,UGT1A4,UGT1A6,Ugt1a7c
P2Y Purigenic Receptor Signaling Pathway	2.14	0.16	2.065	ADCY3,FOS,GNAI1,GNB4,GNG11,MRAS,P2RY1,PIK3R1,PIK3R3,PLCB1,PLCB4,PLCH1,PLCH2,PLCL1,PLCL2,PRKCG,PRKCH,PRKCI,PRKCZ,PRKD1,REL
Senescence Pathway	2.12	0.135	2	ACVR1B,CACNA2D1,CACNA2D4,CACNB2,CACNG4,CALML5,CAPN11,CAPN2,CAPN5,CAPN6,CBX7,CCND1,CDKN2A,CDKN2B,CGAS,E2F2,E2F6,ELF3,IL1A,IL6,MAP2K6,MAPK12,MDM2,MRAS,NFATC1,NFATC2,PHF19,PIK3R1,PIK3R3,PPP2R1B,PPP2R2C,PPP2R5B,PPP3CC,PRKCZ,RB1,Saa3,SMAD6,TGFBR3,TP53,ZFP36L1
Notch Signaling	1.28	0.184	2	CNTN1,DTX4,HES1,JAG2,MFNG,NOTCH3,RBPJ
Superpathway of Geranylgeranyldiphosphate Biosynthesis I (via Mevalonate)	1.13	0.222	2	ACAT2,FDPS,IDI1,MVD
Histidine Degradation VI	0.609	0.143	2	AMDHD1,CYP7B1,HAL,UROC1
Role of PI3K/AKT Signaling in the Pathogenesis of Influenza	0.251	0.0909	2	GNAI1,IFNE,PIK3R1,PIK3R3,PLAC8,REL
Triacylglycerol Biosynthesis	0	0.08	2	DGAT2,LPCAT1,LPIN3,MBOAT2
Apelin Endothelial Signaling Pathway	3.06	0.177	1.964	ADCY3,ANGPT1,APLN,CALML5,FOS,GNA11,GNA15,GNAI1,GNB4,GNG11,ICAM1,MAPK12,MRAS,PIK3R1,PIK3R3,PLCB1,PLCB4,PRKAA2,PRKCG,PRKCH,PRKCI,PRKCZ,PRKD1,REL,VCAM1
CXCR4 Signaling	2.88	0.166	1.964	ADCY3,ELMO3,FOS,GNA11,GNA15,GNAI1,GNB4,GNG11,MAPK12,MRAS,MYL7,MYL9,PAK3,PAK6,PIK3R1,PIK3R3,PLCB1,PLCB4,PRKCG,PRKCH,PRKCI,PRKCZ,PRKD1,RAC3,RHOU,RHOV,RND1,RND3
Actin Cytoskeleton Signaling	1.84	0.135	1.964	ACTA2,ACTG2,APC2,ARHGAP24,ARHGEF4,FGD1,FGD3,FGF11,FGF19,IQGAP2,ITGA10,ITGA11,ITGA7,ITGAE,ITGB6,ITGB7,LIMK2,MRAS,MSN,MYH14,MYL7,MYL9,MYO18B,MYO5C,PAK3,PAK6,PDGFB,PIK3R1,PIK3R3,RAC3,TIAM1,TIAM2,WASF1
ILK Signaling	3.66	0.172	1.961	ACTA2,ACTG2,BMP2,CCND1,CDH1,DSP,FLNC,FOS,ITGB6,ITGB7,KRT18,MAP2K6,MAPK12,MYH14,MYL7,MYL9,MYO18B,MYO5C,PARVB,PGF,PIK3R1,PIK3R3,PPP2R1B,PPP2R2C,PPP2R5B,RAC3,REL,RHOU,RHOV,RND1,RND3,TGFB1I1,TNF,VIM
PAK Signaling	2	0.161	1.941	EPHA3,EPHB3,ITGA10,ITGA11,ITGA7,ITGAE,ITGB6,ITGB7,LIMK2,MAPK12,MRAS,MYL7,MYL9,PAK3,PAK6,PDGFB,PIK3R1,PIK3R3,TNF
Synaptogenesis Signaling Pathway	1.94	0.131	1.897	ADCY3,BDNF,CACNA2D1,CALML5,CAMK2B,CDH1,CDH11,CDH3,CNTNAP1,CPLX2,CPLX4,EFNA3,EFNA4,EFNB1,EPHA1,EPHA3,EPHA7,EPHB2,EPHB3,GRIA3,GRIN1,KALRN,MAP1B,MRAS,NAPB,NECTIN1,NECTIN3,PIK3R1,PIK3R3,SNAP25,SYT13,SYT16,SYT17,SYT6,SYT7,THBS2,THBS4,TIAM1,UNC13A,VLDLR,WASF1
Th2 Pathway	0.441	0.102	1.897	ACVR1B,GATA3,HLA-A,ICAM1,IL12RB1,IL17RB,IL2RG,IL33,JAG2,NFATC2,NOTCH3,PIK3R1,PIK3R3,TGFBR3
Glioblastoma Multiforme Signaling	4.59	0.193	1.89	APC2,CCND1,CDKN2A,E2F2,E2F6,FZD1,FZD2,FZD8,MDM2,MRAS,PDGFB,PIK3R1,PIK3R3,PLCB1,PLCB4,PLCH1,PLCH2,PLCL1,PLCL2,RAC3,RB1,RHOU,RHOV,RND1,RND3,TP53,WNT10A,WNT11,WNT3A,WNT4,WNT5A,WNT6,WNT7A
Toll-like Receptor Signaling	1.64	0.167	1.89	FOS,IL1A,IL1RN,IL33,MAP2K6,MAPK12,MAPK13,PPARA,REL,SIGIRR,TNF,TRAF1,UBD
Retinoate Biosynthesis I	1.48	0.19	1.89	Akr1c12/Akr1c13,AKR1C3,ALDH1A3,DHRS3,DHRS9,RBP1,RDH12,SDR9C7
tRNA Splicing	1.27	0.174	1.89	GDE1,GDPD1,MPPED2,PDE3B,PDE4A,PDE7A,PDE9A,SMPDL3A
Apelin Pancreas Signaling Pathway	1.27	0.174	1.89	APLN,DDIT3,MAPK12,PDE3B,PIK3R1,PIK3R3,PRKAA2,REL
Regulation Of The Epithelial Mesenchymal Transition By Growth Factors Pathway	1.59	0.135	1.877	CDH1,CLDN3,ESRP2,FGF11,FGF19,FGFR2,FOS,IL6,MAP2K6,MAPK12,MAPK13,MEST,MRAS,NGFR,OCLN,PARD6B,PARD6G,PDGFB,PIK3R1,PIK3R3,REL,TNF,TNFRSF11B,TNFSF10,TNFSF13B,VIM
Ephrin Receptor Signaling	2.9	0.159	1.807	ANGPT1,DOK1,EFNA3,EFNA4,EFNB1,EPHA1,EPHA3,EPHA7,EPHB2,EPHB3,GNA11,GNA15,GNAI1,GNB4,GNG11,GRIN1,ITGA10,ITGA11,ITGA7,ITGAE,ITGB6,ITGB7,KALRN,LIMK2,MRAS,PAK3,PAK6,PDGFB,PGF,PTPN13,RAC3,SDC2
Netrin Signaling	2.75	0.208	1.807	CACNA1G,CACNA1I,CACNA2D1,CACNA2D4,CACNB2,CACNG4,ENAH,NFATC1,NFATC2,NTN1,PPP3CC,PRKG1,RAC3,UNC5A,UNC5C
D-myo-inositol-5-phosphate Metabolism	0.625	0.108	1.807	ALPL,CILP,DUSP9,EYA4,G6PC3,PIP4K2A,PLCB1,PLCB4,PLCH1,PLCH2,PPFIA3,PPFIBP2,PPP1R14C,PPP2R1B,PPP2R2C,PPP2R5B,PPP3CC,PTPN13,PTPN22,PTPRF,PTPRN
NAD Signaling Pathway	0.401	0.0993	1.807	BMP6,GJA1,LDHD,NMNAT2,NMRK1,NT5E,PARP3,PDGFB,PIK3R1,PIK3R3,PPARGC1A,PRKAA2,SLC29A1,SLC29A4,TP53
Superpathway of Inositol Phosphate Compounds	0.783	0.111	1.789	ALPL,CILP,DUSP9,EYA4,G6PC3,INPP5J,IP6K3,ITPKB,PIK3R1,PIK3R3,PIP4K2A,PLCB1,PLCB4,PLCH1,PLCH2,PPFIA3,PPFIBP2,PPP1R14C,PPP2R1B,PPP2R2C,PPP2R5B,PPP3CC,PTPN13,PTPN22,PTPRF,PTPRN
IL-17 Signaling	0.597	0.107	1.789	Eda,FOS,IL17RB,IL17RE,IL1A,IL33,IL6,LCN2,MAP2K6,MAPK12,MAPK13,MMP3,MRAS,PGF,PIK3R1,PIK3R3,TNF,TNFRSF11B,TNFSF10,TNFSF13B
NF-κB Signaling	0	0.0351	1.789	BMP2,BMPR1B,CARD10,FGFR2,IL1A,IL1RN,IL33,MAP2K6,MRAS,NGFR,NTRK3,PIK3R1,PIK3R3,PRKCZ,SIGIRR,TGFBR3,TNF,TNFRSF11B,TNFSF13B,TRAF3
RAC Signaling	2.5	0.167	1.732	ANK1,IQGAP2,ITGA10,ITGA11,ITGA7,ITGAE,ITGB6,ITGB7,LIMK2,MRAS,NOX4,PAK3,PAK6,PIK3R1,PIK3R3,PIP4K2A,PRKCI,PRKCZ,RAC3,REL,SH3RF1,TIAM1,WASF1
WNT/Ca+ pathway	2.35	0.203	1.732	FZD1,FZD2,FZD8,NFATC1,NFATC2,PLCB1,PLCB4,PLCH1,PLCH2,PLCL1,PLCL2,REL,WNT5A
Nicotine Degradation III	2.28	0.207	1.732	AOX1,CSGALNACT1,CYP1B1,CYP2S1,CYP2U1,CYP3A5,LARGE2,UGT1A1,UGT1A3,UGT1A4,UGT1A6,Ugt1a7c
Regulation of Actin-based Motility by Rho	2.08	0.164	1.732	ACTA2,ACTG2,ITGA10,ITGA11,ITGA7,ITGAE,ITGB6,ITGB7,MYL7,MYL9,PAK3,PAK6,PIP4K2A,RAC3,RHOU,RHOV,RND1,RND3,WASF1
Melatonin Degradation I	2.04	0.194	1.732	CSGALNACT1,CYP1B1,CYP2S1,CYP2U1,CYP3A5,LARGE2,Sult1a1,UGT1A1,UGT1A3,UGT1A4,UGT1A6,Ugt1a7c
Nicotine Degradation II	1.83	0.182	1.732	AOX1,CSGALNACT1,CYP1B1,CYP2S1,CYP2U1,CYP3A5,LARGE2,UGT1A1,UGT1A3,UGT1A4,UGT1A6,Ugt1a7c
Superpathway of Melatonin Degradation	1.78	0.179	1.732	CSGALNACT1,CYP1B1,CYP2S1,CYP2U1,CYP3A5,LARGE2,Sult1a1,UGT1A1,UGT1A3,UGT1A4,UGT1A6,Ugt1a7c
LPS-stimulated MAPK Signaling	1.37	0.153	1.732	FOS,MAP2K6,MAPK12,MAPK13,MRAS,PIK3R1,PIK3R3,PRKCG,PRKCH,PRKCI,PRKCZ,PRKD1,REL
Insulin Receptor Signaling	0.293	0.0929	1.732	ASIC1,INPP5J,MRAS,PDE3B,PIK3R1,PIK3R3,PPP1R14C,PRKCI,PRKCZ,PTPRF,SCNN1A,SCNN1B,SLC2A4
HMGB1 Signaling	1.79	0.144	1.698	Eda,FOS,ICAM1,IL1A,IL33,IL6,MAP2K6,MAPK12,MAPK13,MRAS,NGFR,PIK3R1,PIK3R3,RAC3,REL,RHOU,RHOV,RND1,RND3,TNF,TNFRSF11B,TNFSF10,TNFSF13B,VCAM1
T Cell Receptor Signaling	0	0.0309	1.698	CALML5,FOS,HLA-A,HLA-E,ICAM1,MAP2K6,MAPK12,MAPK13,MRAS,NFATC1,NFATC2,PIK3R1,PIK3R3,PPP3CC,PTPN22,REL,Tcf7,TCF7L1,TNF
Intrinsic Prothrombin Activation Pathway	2.44	0.238	1.667	COL10A1,COL18A1,COL1A1,COL1A2,KLK11,KLK13,KLK14,KLKB1,PROS1,THBD
CD40 Signaling	1.1	0.149	1.667	FOS,ICAM1,MAP2K6,MAPK12,MAPK13,PIK3R1,PIK3R3,REL,TRAF1,TRAF3
α-Adrenergic Signaling	0.955	0.13	1.667	ADCY3,CALML5,GNA11,GNA15,GNAI1,GNB4,GNG11,MRAS,PRKCG,PRKCH,PRKCI,PRKCZ,PRKD1,SLC8A1
Prolactin Signaling	0.599	0.116	1.667	FOS,KCNMA1,MRAS,PIK3R1,PIK3R3,PRKCG,PRKCH,PRKCI,PRKCZ,PRKD1
Th1 Pathway	0.367	0.0984	1.667	GATA3,HLA-A,ICAM1,IL12RB1,IL18R1,IL6,MAP2K6,NFATC1,NFATC2,NOTCH3,PIK3R1,PIK3R3
Role of NANOG in Mammalian Embryonic Stem Cell Pluripotency	2.96	0.183	1.633	APC2,BMP2,BMP3,BMP6,BMPR1B,FZD1,FZD2,FZD8,LIFR,MRAS,PIK3R1,PIK3R3,SOX2,TCF7L1,TP53,WNT10A,WNT11,WNT3A,WNT4,WNT5A,WNT6,WNT7A
IL-23 Signaling Pathway	1.27	0.174	1.633	IL12RB1,IL23R,PIK3R1,PIK3R3,REL,RORA,RORC,TNF
IGF-1 Signaling	1.06	0.135	1.633	CCN2,FOS,IGFBP2,IGFBP3,IGFBP4,IGFBP5,IGFBP6,IGFBP7,MRAS,PIK3R1,PIK3R3,PRKCI,PRKCZ,SFN
IL-17A Signaling in Airway Cells	0.583	0.119	1.633	CXCL6,IL17RB,IL6,MAPK12,MAPK13,PIK3R1,PIK3R3,REL
SPINK1 General Cancer Pathway	0	0.087	1.633	IL6,MRAS,Mt3,PIK3R1,PIK3R3,PRSS3
Pulmonary Healing Signaling Pathway	5.07	0.191	1.622	ACKR3,BMPR1B,CCND1,CDH1,FGFR2,FZD1,FZD2,FZD8,MAPK12,MAPK13,MMP11,MMP15,MMP17,MMP3,MMP7,MRAS,NFATC1,NGFR,NOTCH3,PGF,PRKAA2,PRKCG,PRKCH,PRKCI,PRKCZ,PRKD1,RBPJ,Tcf7,TCF7L1,TNF,TNFRSF11B,WNT10A,WNT11,WNT3A,WNT4,WNT5A,WNT6,WNT7A
Fc Epsilon RI Signaling	2.33	0.169	1.606	INPP5J,MAP2K6,MAPK12,MAPK13,MRAS,PIK3R1,PIK3R3,PLA2G12A,PLA2G3,PLA2G4A,PLA2G4E,PLA2G4F,PLA2G5,PRKCG,PRKCH,PRKCI,PRKCZ,PRKD1,RAC3,TNF
Renin-Angiotensin Signaling	1.07	0.131	1.604	ADCY3,FOS,MAPK12,MAPK13,MRAS,PAK3,PAK6,PIK3R1,PIK3R3,PRKCG,PRKCH,PRKCI,PRKCZ,PRKD1,REL,TNF
Integrin Signaling	1.98	0.141	1.569	ACTA2,ACTG2,CAPN11,CAPN2,CAPN5,CAPN6,CAV1,ITGA10,ITGA11,ITGA7,ITGAE,ITGB6,ITGB7,MRAS,MYL7,MYL9,PAK3,PAK6,PARVB,PDGFB,PIK3R1,PIK3R3,RAC3,RHOU,RHOV,RND1,RND3,TSPAN1,TSPAN4,TSPAN7
Neurovascular Coupling Signaling Pathway	2.39	0.147	1.567	ADORA2B,CACNA1G,CACNA1I,CACNA2D1,CACNA2D4,CACNB2,CACNG4,CALML5,DAGLA,ENTPD2,GABRP,GJA1,GRIA3,GRIN1,KCNJ15,KCNMA1,KCNN4,LCAT,NOS1,NPR2,P2RY1,PLA2G12A,PLA2G3,PLA2G4A,PLA2G4E,PLA2G4F,PLA2G5,PLCB1,PLCB4,PRKG1,PRKG2,PTGER4,SOX15
MSP-RON Signaling In Cancer Cells Pathway	2.18	0.159	1.528	ACTA2,CCND1,ELF3,FOS,HGFAC,KLK11,KLK13,KLK14,KLKB1,MRAS,MST1R,PGF,PIK3R1,PIK3R3,PLAUR,REL,RPS6KA2,SFN,ST14,Tcf7,TCF7L1,VIM
Systemic Lupus Erythematosus In B Cell Signaling Pathway	0	0.0443	1.512	CALML5,CCND1,CD5,Eda,FOS,FOXG1,Ighg2b,Ighg2c,IGKC,IL1A,IL33,IL6,INPP5J,ISG15,MRAS,NFATC1,NFATC2,PIK3R1,PIK3R3,PPP3CC,PRKCG,PRKCH,PRKCI,PRKCZ,PRKD1,RAC3,REL,TNF,TNFSF10,TNFSF13B,TRAF1,TRAF3
UVB-Induced MAPK Signaling	2.21	0.212	1.508	FOS,MAPK12,MAPK13,PIK3R1,PIK3R3,PRKCG,PRKCH,PRKCI,PRKCZ,PRKD1,TP53
CCR5 Signaling in Macrophages	0	0.0421	1.508	CACNA1G,CACNA1I,CACNA2D1,CACNA2D4,CACNB2,CACNG4,CALML5,FOS,GNA11,GNA15,GNAI1,GNB4,GNG11,MAPK12,MAPK13,MRAS,PRKCG,PRKCH,PRKCI,PRKCZ,PRKD1
CDC42 Signaling	0	0.0365	1.508	APC2,FGD1,FGD3,FOS,HLA-A,HLA-E,IQGAP2,ITGA10,ITGA11,ITGA7,ITGAE,ITGB6,ITGB7,LIMK2,MAPK12,MAPK13,MYL7,MYL9,PAK3,PRKCI,PRKCZ
ERBB Signaling	1.99	0.17	1.5	AREG,ERBB3,FOS,MAP2K6,MAPK12,MAPK13,MRAS,PAK3,PAK6,PIK3R1,PIK3R3,PRKCG,PRKCH,PRKCI,PRKCZ,PRKD1
Tumor Microenvironment Pathway	3.46	0.173	1.461	ARG1,CCND1,COL1A1,COL1A2,CSPG4,FGF11,FGF19,FOS,FOXG1,HLA-A,HLA-E,ICAM1,IDO2,IL6,LEPR,MMP11,MMP15,MMP17,MMP3,MMP7,MRAS,PDGFB,PGF,PIK3R1,PIK3R3,REL,SLC1A4,SLC2A4,TIAM1,TNC,TNF
Dopamine-DARPP32 Feedback in cAMP Signaling	2.43	0.155	1.46	ADCY3,CACNA2D1,CACNA2D4,CACNB2,CACNG4,CALML5,GNAI1,GRIN1,KCNJ15,NOS1,PLCB1,PLCB4,PLCH1,PLCH2,PLCL1,PLCL2,PPP1R14C,PPP2R1B,PPP2R2C,PPP2R5B,PPP3CC,PRKCG,PRKCH,PRKCI,PRKCZ,PRKD1,PRKG1,PRKG2
Regulation Of The Epithelial Mesenchymal Transition In Development Pathway	4.6	0.241	1.414	BCL9,CDH1,FZD1,FZD2,FZD8,GLI3,GLIS2,JAG2,LOX,RBPJ,REL,S100A4,Tcf7,TCF7L1,WNT10A,WNT11,WNT3A,WNT4,WNT5A,WNT6,WNT7A
eNOS Signaling	1.76	0.145	1.414	ADCY3,AQP1,AQP3,AQP4,AQP5,CALML5,CAV1,CHRNB1,ESR1,ESR2,HSPA1A/HSPA1B,HSPA2,LPAR1,PGF,PIK3R1,PIK3R3,PRKAA2,PRKCG,PRKCH,PRKCI,PRKCZ,PRKD1,PRKG1
Calcium Signaling	1.45	0.13	1.414	ACTA2,ATP2B4,CACNA1G,CACNA1I,CACNA2D1,CACNA2D4,CACNB2,CACNG4,CALML5,CAMK1,CAMK2B,CHRNB1,GRIA3,GRIN1,HDAC11,MYH14,MYL7,MYL9,MYO18B,MYO5C,NFATC1,NFATC2,PNCK,PPP3CC,SLC8A1,TP63,Tpm2,TRPC1
Macropinocytosis Signaling	1.39	0.158	1.414	ITGB6,ITGB7,MRAS,MRC1,PDGFB,PIK3R1,PIK3R3,PRKCG,PRKCH,PRKCI,PRKCZ,PRKD1
TREM1 Signaling	0.58	0.117	1.414	ICAM1,IL6,LAT2,Naip1 (includes others),NLRP10,NLRP4,REL,SIGIRR,TNF
ERBB4 Signaling	0.562	0.118	1.414	MRAS,PIK3R1,PIK3R3,PRKCG,PRKCH,PRKCI,PRKCZ,PRKD1
NF-κB Activation by Viruses	0.561	0.115	1.414	MRAS,PIK3R1,PIK3R3,PRKCG,PRKCH,PRKCI,PRKCZ,PRKD1,REL
TEC Kinase Signaling	0	0.0587	1.414	ACTA2,ACTG2,FOS,GNA11,GNA15,GNAI1,GNB4,GNG11,ITGA10,ITGA11,ITGA7,ITGAE,ITGB6,ITGB7,MAPK12,MRAS,PAK3,PAK6,PIK3R1,PIK3R3,PRKCG,PRKCH,PRKCI,PRKCZ,PRKD1,RAC3,REL,RHOU,RHOV,RND1,RND3,TNF,TNFRSF10A,TNFSF10
Sperm Motility	6.04	0.188	1.4	AXL,CACNA1G,CACNA1I,CALML5,DDR2,DYRK3,EPHA1,EPHA3,EPHB2,EPHB3,ERBB3,FES,FGFR2,GNA11,GNA15,GNAI1,GNB4,GNG11,LCAT,LMTK3,MAP2K6,MRAS,MST1R,NTRK3,PDE4A,PEAK1,PLA2G12A,PLA2G3,PLA2G4A,PLA2G4E,PLA2G4F,PLA2G5,PLCB1,PLCB4,PLCH1,PLCH2,PLCL1,PLCL2,PRKCG,PRKCH,PRKCI,PRKCZ,PRKD1,PRKG1,PRKG2,PTK7,TNK1,ZAN
Semaphorin Neuronal Repulsive Signaling Pathway	4.9	0.205	1.4	CSPG4,DPYSL2,DPYSL3,FES,ITGA10,ITGA11,ITGA7,ITGAE,ITGB6,ITGB7,LIMK2,MAP2K6,MYL7,MYL9,NRP2,PAK3,PAK6,PDE4A,Pde4d,PIK3R1,PIK3R3,PLXNB1,PRKG1,PRKG2,RND1,SEMA3E,SEMA5A,SEMA6A,SEMA6C,TP53,VCAN
Aryl Hydrocarbon Receptor Signaling	2.63	0.164	1.387	ALDH1A3,ALDH2,ALDH3A1,ALDH5A1,CCND1,CDKN2A,CYP1B1,CYP3A5,ESR1,ESR2,FOS,GSTA5,GSTM5,GSTO1,IL1A,IL6,MDM2,MGST1,NQO1,NQO2,RB1,REL,RXRA,TNF,TP53,TP73
3-phosphoinositide Biosynthesis	0.303	0.0927	1.387	ALPL,CILP,DUSP9,EYA4,G6PC3,PIK3R1,PIK3R3,PIP4K2A,PPFIA3,PPFIBP2,PPP1R14C,PPP2R1B,PPP2R2C,PPP2R5B,PPP3CC,PTPN13,PTPN22,PTPRF,PTPRN
Thrombin Signaling	3.74	0.17	1.347	ADCY3,ARHGEF16,ARHGEF4,ARHGEF9,CAMK1,CAMK2B,GATA3,GNA11,GNA15,GNAI1,GNB4,GNG11,MAPK12,MAPK13,MRAS,MYL7,MYL9,PIK3R1,PIK3R3,PLCB1,PLCB4,PLCH1,PLCH2,PLCL1,PLCL2,PRKCG,PRKCH,PRKCI,PRKCZ,PRKD1,RAC3,REL,RHOU,RHOV,RND1,RND3
14-3-3-mediated Signaling	2.99	0.181	1.342	FOS,MAPK12,MRAS,PIK3R1,PIK3R3,PLCB1,PLCB4,PLCH1,PLCH2,PLCL1,PLCL2,PRKCG,PRKCH,PRKCI,PRKCZ,PRKD1,SFN,TNF,TP73,TUBA3E,TUBB3,TUBB4A,VIM
IL-15 Production	2.46	0.171	1.342	AXL,DDR2,DYRK3,EPHA1,EPHA3,EPHB2,EPHB3,ERBB3,FES,FGFR2,IL6,LMTK3,MAP2K6,MST1R,NTRK3,PEAK1,PRKCI,PRKCZ,PTK7,REL,TNK1
p70S6K Signaling	2.42	0.167	1.342	F2RL1,GNAI1,Ighg2b,IL2RG,MRAS,PIK3R1,PIK3R3,PLCB1,PLCB4,PLCH1,PLCH2,PLCL1,PLCL2,PPP2R1B,PPP2R2C,PPP2R5B,PRKCG,PRKCH,PRKCI,PRKCZ,PRKD1,SFN
Glutathione Redox Reactions I	1.97	0.25	1.342	GPX2,GPX3,GPX7,Gsta4,GSTA5,Gstt1,MGST1
The Visual Cycle	1.36	0.227	1.342	AKR1C3,DHRS3,DHRS9,RBP1,RDH12
Pyrimidine Ribonucleotides Interconversion	0.682	0.143	1.342	AK1,AK4,AK5,ENTPD2,NME4
Pyrimidine Ribonucleotides De Novo Biosynthesis	0.616	0.135	1.342	AK1,AK4,AK5,ENTPD2,NME4
Complement System	0.616	0.135	1.342	C1R,C1S,C3,C5,SERPING1
EGF Signaling	0.246	0.0909	1.342	FOS,MAPK12,MAPK13,PIK3R1,PIK3R3
Heparan Sulfate Biosynthesis (Late Stages)	3.21	0.215	1.291	Ces2b,Ces2f,CHST1,CHST11,CHST15,CHST3,EXTL1,GLCE,HS3ST1,HS3ST3A1,HS3ST3B1,HS3ST6,HS6ST2,NDST3,PLA1A,SULT4A1,UST
Heparan Sulfate Biosynthesis	2.77	0.198	1.291	Ces2b,Ces2f,CHST1,CHST11,CHST15,CHST3,EXTL1,GLCE,HS3ST1,HS3ST3A1,HS3ST3B1,HS3ST6,HS6ST2,NDST3,PLA1A,SULT4A1,UST
Cardiac β-adrenergic Signaling	2.25	0.152	1.291	ADCY3,ADRB1,AKAP6,CACNA2D1,CACNA2D4,CACNB2,CACNG4,GDE1,GDPD1,GNA11,GNA15,GNAI1,GNB4,GNG11,MPPED2,MRAS,PDE3B,PDE4A,PDE7A,PDE9A,PKIA,PPP1R14C,PPP2R1B,PPP2R2C,PPP2R5B,SLC8A1,SMPDL3A
p38 MAPK Signaling	1.42	0.144	1.291	DDIT3,IL1A,IL1RL2,IL1RN,IL33,MAP2K6,MAPK12,MAPK13,PLA2G12A,PLA2G3,PLA2G4A,PLA2G4E,PLA2G4F,PLA2G5,RPS6KA2,TNF,TP53
Neuropathic Pain Signaling In Dorsal Horn Neurons	4.06	0.218	1.279	BDNF,CAMK1,CAMK2B,FOS,GRIA3,GRIN1,KCNH2,KCNN4,PIK3R1,PIK3R3,PLCB1,PLCB4,PLCH1,PLCH2,PLCL1,PLCL2,PRKCG,PRKCH,PRKCI,PRKCZ,PRKD1,TACR1
Thrombopoietin Signaling	1.25	0.159	1.265	FOS,MRAS,PIK3R1,PIK3R3,PRKCG,PRKCH,PRKCI,PRKCZ,PRKD1,THPO
Neuregulin Signaling	1.19	0.137	1.265	AREG,ERBB3,ITGA10,ITGA11,ITGA7,ITGAE,ITGB6,ITGB7,MRAS,PIK3R1,PIK3R3,PRKCG,PRKCH,PRKCI,PRKCZ,PRKD1
IL-3 Signaling	0.75	0.127	1.265	FOS,MRAS,PIK3R1,PIK3R3,PPP3CC,PRKCG,PRKCH,PRKCI,PRKCZ,PRKD1
Gαs Signaling	0.648	0.114	1.265	ADCY3,ADORA2B,ADRB1,GNA11,GNA15,GNAI1,GNB4,GNG11,MRAS,PTGER4,PTH1R,RAPGEF3,VIPR1,VIPR2
Calcium-induced T Lymphocyte Apoptosis	0	0.0217	1.265	CALML5,CAPN2,HLA-A,NFATC2,PPP3CC,PRKCG,PRKCH,PRKCI,PRKCZ,PRKD1
NUR77 Signaling in T Lymphocytes	0	0.0234	1.265	CALML5,HLA-A,HLA-E,NFATC1,PPP3CC,PRKCG,PRKCH,PRKCI,PRKCZ,PRKD1,RXRA,TNFSF10
Osteoarthritis Pathway	4.49	0.175	1.257	ADAMTS5,ALPL,BMP2,CASP14,COL10A1,DDR2,ELF3,EPAS1,FZD1,FZD2,FZD8,GLI3,GLIS2,GREM1,HES1,HTRA1,IL1RL2,ITGA10,ITGA11,ITGA7,ITGAE,ITGB6,ITGB7,MMP3,PGF,PPARG,PPARGC1A,PRKAA2,PTH1R,PTHLH,RARRES2,RBPJ,REL,SLC39A8,SMAD6,SPHK1,Tcf7,TCF7L1,TIMP3,TNF,WNT3A
Production of Nitric Oxide and Reactive Oxygen Species in Macrophages	1.85	0.141	1.225	FOS,HOXA10,MAP3K6,MAP3K9,MAPK12,MAPK13,NGFR,PIK3R1,PIK3R3,PPARA,PPP1R14C,PPP2R1B,PPP2R2C,PPP2R5B,PRKCG,PRKCH,PRKCI,PRKCZ,PRKD1,RAC3,REL,RHOU,RHOV,RND1,RND3,TNF,TNFRSF11B
Acute Phase Response Signaling	2.03	0.146	1.213	A2M,C1R,C1S,C3,C5,CP,CRABP2,FOS,IL1A,IL1RN,IL33,IL6,KLKB1,MAP2K6,MAPK12,MAPK13,MRAS,NGFR,PIK3R1,PIK3R3,RBP1,REL,Saa3,SERPINF1,SERPING1,TNF,TNFRSF11B
Glioma Signaling	2.76	0.177	1.155	CALML5,CAMK1,CAMK2B,CCND1,CDKN2A,CDKN2B,E2F2,E2F6,HDAC11,IDH1,MDM2,MRAS,PDGFB,PIK3R1,PIK3R3,PRKCG,PRKCH,PRKCI,PRKCZ,PRKD1,RB1,TP53
Role of MAPK Signaling in Inhibiting the Pathogenesis of Influenza	1.35	0.156	1.155	IL6,LCAT,MAP2K6,MAPK12,MAPK13,PLA2G12A,PLA2G3,PLA2G4A,PLA2G4E,PLA2G4F,PLA2G5,TNF
Salvage Pathways of Pyrimidine Ribonucleotides	0.752	0.122	1.155	AK1,AK4,AK5,DMPK,LIMK2,MAP2K6,MAP3K6,MAP3K9,NME4,PAK3,PRKAA2,PRKCH
Glutathione-mediated Detoxification	1.34	0.189	1.134	GGH,Gsta4,GSTA5,GSTM5,GSTO1,Gstt1,MGST1
Gαi Signaling	0	0.0786	1.134	ADCY3,CAV1,GNA11,GNA15,GNAI1,GNB4,GNG11,LPAR1,LTB4R,MRAS,NPY1R
VEGF Signaling	0	0.0707	1.134	ACTA2,ACTG2,MRAS,PGF,PIK3R1,PIK3R3,SFN
CCR3 Signaling in Eosinophils	4.57	0.207	1.091	CALML5,CCL24,GNA11,GNA15,GNAI1,GNB4,GNG11,LIMK2,MAPK12,MAPK13,MRAS,PAK3,PAK6,PIK3R1,PIK3R3,PLA2G12A,PLA2G3,PLA2G4A,PLA2G4E,PLA2G4F,PLA2G5,PLCB1,PLCB4,PRKCG,PRKCH,PRKCI,PRKCZ,PRKD1
Synaptic Long Term Potentiation	2.21	0.163	1.091	CALML5,CAMK2B,GNA11,GNA15,GRIA3,GRIN1,MRAS,PLCB1,PLCB4,PLCH1,PLCH2,PLCL1,PLCL2,PPP1R14C,PPP3CC,PRKCG,PRKCH,PRKCI,PRKCZ,PRKD1,RAPGEF3
Epithelial Adherens Junction Signaling	1.33	0.134	1.091	ACVR1B,ARHGEF17,CDH1,LIMK2,MRAS,MYL7,NECTIN1,NECTIN3,NOTCH3,PAK3,PAK6,PPP2R1B,PPP2R2C,PPP2R5B,PRKAA2,SFN,Tcf7,TCF7L1,TGFBR3,TIAM1,WASF1
Serotonin Degradation	2.81	0.211	1.069	ADHFE1,ALDH1A3,Aldh1a7,ALDH2,ALDH3A1,Aldh3b2,CSGALNACT1,DHRS9,LARGE2,Sult1a1,UGT1A1,UGT1A3,UGT1A4,UGT1A6,Ugt1a7c
NRF2-mediated Oxidative Stress Response	1.4	0.127	1.069	ACTA2,ACTG2,AOX1,CBR1,Cyp2j9,CYP2R1,CYP2S1,CYP2U1,CYP3A5,EPHX1,FKBP5,FOS,FOSL1,GCLM,GPX2,GSTA5,GSTM5,GSTO1,MAP2K6,MGST1,MRAS,NQO1,NQO2,PIK3R1,PIK3R3,PRKCG,PRKCH,PRKCI,PRKCZ,PRKD1
nNOS Signaling in Neurons	3.69	0.277	1	CALML5,CAPN11,CAPN2,CAPN5,CAPN6,GRIN1,NOS1,PPP3CC,PRKCG,PRKCH,PRKCI,PRKCZ,PRKD1
VEGF Family Ligand-Receptor Interactions	2.89	0.202	1	FOS,MRAS,NRP2,PGF,PIK3R1,PIK3R3,PLA2G12A,PLA2G3,PLA2G4A,PLA2G4E,PLA2G4F,PLA2G5,PRKCG,PRKCH,PRKCI,PRKCZ,PRKD1
Histidine Degradation III	2.45	0.5	1	AMDHD1,HAL,MTHFD2,UROC1
γ-glutamyl Cycle	1.61	0.308	1	CHAC1,GCLM,GGT1,GGT6
Glutaryl-CoA Degradation	1.44	0.238	1	ACAT2,CDYL,CYP2S1,EHHADH,L3HYPDH
Paxillin Signaling	1.2	0.139	1	ACTA2,ACTG2,ITGA10,ITGA11,ITGA7,ITGAE,ITGB6,ITGB7,MAPK12,MAPK13,MRAS,PAK3,PAK6,PIK3R1,PIK3R3
Leptin Signaling in Obesity	1.09	0.145	1	ADCY3,LEPR,PDE3B,PIK3R1,PIK3R3,PLCB1,PLCB4,PLCH1,PLCH2,PLCL1,PLCL2
IL-17A Signaling in Gastric Cells	1.09	0.192	1	FOS,IL17RB,MAPK12,MAPK13,TNF
IL-9 Signaling	1.03	0.171	1	CISH,IL2RG,PIK3R1,PIK3R3,REL,TNF
AMPK Signaling	0.963	0.116	1	ADRB1,AK1,AK4,AK5,CCND1,CHRNB1,CPT1C,FOXG1,GNA11,GNA15,GNAI1,GNB4,GNG11,MAPK12,MAPK13,MRAS,PCK2,PIK3R1,PIK3R3,PPARGC1A,PPM1E,PPP2R1B,PPP2R2C,PPP2R5B,PRKAA2,RAB27A,SLC2A4,SMARCA2
Pyrimidine Deoxyribonucleotides De Novo Biosynthesis I	0.821	0.174	1	AK1,AK4,AK5,NME4
Gluconeogenesis I	0.686	0.154	1	ALDOC,ENO1,ENO3,ME1
SAPK/JNK Signaling	0	0.0199	1	GNB4,GNG11,MAP3K9,MAPK12,MRAS,NFATC1,PIK3R1,PIK3R3,RAC3,TP53
Cell Cycle: G2/M DNA Damage Checkpoint Regulation	0	0.08	1	CDKN2A,MDM2,SFN,TP53
Hypoxia Signaling in the Cardiovascular System	0	0.0541	1	MDM2,NQO1,SLC2A4,TP53
BAG2 Signaling Pathway	0	0.0595	1	HSPA1A/HSPA1B,HSPA2,MDM2,REL,TP53
Systemic Lupus Erythematosus In T Cell Signaling Pathway	0	0.0391	1	CASP14,ESR1,FOS,GNAI1,HLA-A,HLA-E,IL6,LEPR,MAP2K6,MRAS,MSN,NFATC2,NOS1,PIK3R1,PIK3R3,PPP2R1B,PPP2R2C,PPP2R5B,PPP3CC,RAC3,RHOU,RHOV,RND1,RND3,RORC
Kinetochore Metaphase Signaling Pathway	0	0.045	1	BOD1,DNAH10,PPP1R14C,PPP2R5B,STAG3
STAT3 Pathway	3.35	0.185	0.943	BMP6,BMPR1B,CISH,FGFR2,IFNLR1,IL12RB1,IL13RA1,IL13RA2,IL17RB,IL17RE,IL18R1,IL1A,IL1RL2,IL20RA,IL22RA1,IL2RG,IL31RA,MAP3K9,MAPK12,MAPK13,MRAS,NGFR,NTRK3,PDGFB,TGFBR3
Sphingosine-1-phosphate Signaling	2.25	0.167	0.943	ADCY3,CASP14,GNAI1,PDGFB,PIK3R1,PIK3R3,PLCB1,PLCB4,PLCH1,PLCH2,PLCL1,PLCL2,RAC3,RHOU,RHOV,RND1,RND3,S1PR5,SMPD3,SPHK1
mTOR Signaling	0.544	0.104	0.943	GPLD1,MRAS,PGF,PIK3R1,PIK3R3,PLD5,PPP2R1B,PPP2R2C,PPP2R5B,PRKAA2,PRKCG,PRKCH,PRKCI,PRKCZ,PRKD1,PRR5,RAC3,RHOU,RHOV,RND1,RND3,RPS6KA2
RANK Signaling in Osteoclasts	1.17	0.143	0.905	CALML5,FOS,MAP2K6,MAP3K6,MAP3K9,MAPK12,MAPK13,NFATC1,NFATC2,PIK3R1,PIK3R3,PPP3CC,REL
Endocannabinoid Developing Neuron Pathway	0.333	0.096	0.905	ADCY3,CCND1,GNAI1,GNB4,GNG11,MAP2K6,MAPK12,MAPK13,MRAS,PIK3R1,PIK3R3,RAC3
PI3K Signaling in B Lymphocytes	2	0.154	0.894	ATF5,ATF6,C3,CALML5,CAMK2B,CARD10,FOS,Ighg2b,MRAS,NFATC1,NFATC2,PIK3R1,PLCB1,PLCB4,PLCH1,PLCH2,PLCL1,PLCL2,PPP3CC,PRKCI,PRKCZ,REL
Putrescine Degradation III	2.6	0.318	0.816	ALDH1A3,Aldh1a7,ALDH2,ALDH3A1,Aldh3b2,SAT1,SAT2
Ethanol Degradation IV	2.36	0.292	0.816	ACSS1,ALDH1A3,Aldh1a7,ALDH2,ALDH3A1,Aldh3b2,GPX7
Tryptophan Degradation III (Eukaryotic)	1.97	0.25	0.816	ACAT2,AFMID,CDYL,CYP2S1,EHHADH,KYNU,L3HYPDH
IL-1 Signaling	1.03	0.135	0.816	ADCY3,FOS,GNA11,GNA15,GNAI1,GNB4,GNG11,IL1A,MAP2K6,MAPK12,MAPK13,MRAS,REL
Retinol Biosynthesis	0.627	0.13	0.816	AKR1C3,DHRS3,DHRS9,PNPLA2,RBP1,RDH12
Antiproliferative Role of Somatostatin Receptor 2	0.58	0.117	0.816	GNB4,GNG11,MRAS,NOS1,NPR2,PIK3R1,PIK3R3,SOX15,SSTR2
Renal Cell Carcinoma Signaling	0.521	0.113	0.816	EGLN3,FOS,MRAS,PAK3,PAK6,PDGFB,PIK3R1,PIK3R3,UBD
Type I Diabetes Mellitus Signaling	0	0.0216	0.816	GAD2,HLA-A,HLA-E,MAP2K6,MAPK12,MAPK13,NGFR,PTPRN,REL,TNF,TNFRSF11B
Estrogen-Dependent Breast Cancer Signaling	0	0.0886	0.816	CCND1,ESR1,FOS,MRAS,PIK3R1,PIK3R3,REL
JAK/STAT Signaling	0	0.0854	0.816	CISH,FOS,IL6,MRAS,PIK3R1,PIK3R3,REL
Phospholipases	3.59	0.239	0.775	GPLD1,LCAT,PLA1A,PLA2G12A,PLA2G3,PLA2G4A,PLA2G4E,PLA2G4F,PLA2G5,PLCB1,PLCB4,PLCH1,PLCH2,PLCL1,PLCL2,PLD5
Ceramide Signaling	2.55	0.189	0.775	CERK,FOS,KSR1,MRAS,NGFR,PIK3R1,PIK3R3,PPP2R1B,PPP2R2C,PPP2R5B,PRKCZ,REL,S1PR5,SMPD3,SPHK1,TNF,TNFRSF11B
HGF Signaling	2.42	0.167	0.775	CCND1,CDKN2A,ELF3,FOS,IL6,ITGA10,ITGA11,ITGA7,ITGAE,ITGB6,ITGB7,MAP3K6,MAP3K9,MAPK12,MRAS,PIK3R1,PIK3R3,PRKCG,PRKCH,PRKCI,PRKCZ,PRKD1
Type II Diabetes Mellitus Signaling	2.24	0.157	0.775	CACNA1G,CACNA1I,CACNA2D1,CACNA2D4,CACNB2,CACNG4,MAPK12,NGFR,PDX1,PIK3R1,PIK3R3,PPARG,PRKAA2,PRKCG,PRKCH,PRKCI,PRKCZ,PRKD1,REL,SLC27A1,SLC2A4,SMPD3,TNF,TNFRSF11B
Ferroptosis Signaling Pathway	0.664	0.114	0.775	ALOX12,ALOX12B,Alox12e,ALOX15,CHAC1,MRAS,NOX4,PRKAA2,RB1,SAT1,SLC1A5,SLC39A14,SLC39A8,TFAP2C,TP53
B Cell Receptor Signaling	0	0.0334	0.775	CALML5,CAMK2B,CARD10,EBF1,Ighg2b,Ighg2c,IGKC,INPP5J,MAP2K6,MAP3K6,MAP3K9,MAPK12,MAPK13,MRAS,NFATC1,NFATC2,PAX5,PIK3R1,PIK3R3,PPP3CC,REL
Eicosanoid Signaling	4.6	0.265	0.707	AKR1C3,ALOX12,ALOX12B,ALOX15,DPEP2,GGT1,LCAT,LTB4R,LTC4S,PLA2G12A,PLA2G3,PLA2G4A,PLA2G4E,PLA2G4F,PLA2G5,PTGDS,PTGER4,PTGFR
HIF1α Signaling	2.95	0.159	0.707	BMP6,CAMK1,CAMK2B,EGLN3,HSPA1A/HSPA1B,HSPA2,IL6,MAP2K6,MDM2,MMP11,MMP15,MMP17,MMP3,MMP7,MRAS,NOX4,PDGFB,PGF,PIK3R1,PIK3R3,PPP3CC,PRKCG,PRKCH,PRKCI,PRKCZ,PRKD1,RAC3,RORC,SAT1,SAT2,SLC2A4,TP53,VIM
Small Cell Lung Cancer Signaling	1.29	0.146	0.707	CCND1,CDKN2B,E2F2,E2F6,HDAC11,NOS1,PIK3R1,PIK3R3,RB1,REL,RXRA,TP53,TRAF1,TRAF3
MYC Mediated Apoptosis Signaling	1.1	0.16	0.707	ADRB1,BBC3,CDKN2A,MDM2,NGFR,TNF,TNFRSF11B,TP53
Pyridoxal 5'-phosphate Salvage Pathway	0.606	0.121	0.707	DMPK,LIMK2,MAP2K6,MAP3K6,MAP3K9,PAK3,PRKAA2,PRKCH
Neurotrophin/TRK Signaling	0.6	0.118	0.707	BDNF,FOS,MAP2K6,MRAS,NGFR,NTF4,NTRK3,PIK3R1,PIK3R3
FGF Signaling	0.303	0.0952	0.707	FGF11,FGF19,FGFR2,MAP2K6,MAPK12,MAPK13,PIK3R1,PIK3R3
PDGF Signaling	0.279	0.093	0.707	CAV1,FOS,INPP5J,MRAS,PDGFB,PIK3R1,PIK3R3,SPHK1
CD28 Signaling in T Helper Cells	0	0.0193	0.707	CALML5,FOS,HLA-A,MAPK12,NFATC1,NFATC2,PIK3R1,PIK3R3,PPP3CC,REL
Coronavirus Pathogenesis Pathway	0.319	0.0936	0.688	ACE2,AR,CCND1,DDIT3,E2F2,E2F6,FOS,HDAC11,IL6,MAPK12,MAPK13,OAS2,PYCARD,RB1,REL,RIPK3,TMPRSS2,TP53,TRAF3
VDR/RXR Activation	3.76	0.231	0.632	CEBPA,COL13A1,CST6,HES1,HOXA10,IGFBP3,IGFBP5,IGFBP6,MXD1,PRKCG,PRKCH,PRKCI,PRKCZ,PRKD1,RXRA,SEMA3B,SERPINB1,THBD
FAT10 Cancer Signaling Pathway	2.34	0.22	0.632	ACKR3,ACVR1B,HOXB9,IL6,NGFR,REL,TGFBR3,TNF,TNFRSF11B,TP53,UBD
UVA-Induced MAPK Signaling	1.82	0.163	0.632	FOS,MAPK12,MAPK13,MRAS,PARP3,PIK3R1,PIK3R3,PLCB1,PLCB4,PLCH1,PLCH2,PLCL1,PLCL2,RPS6KA2,SMPD3,TP53
BMP signaling pathway	1.03	0.138	0.632	BMP2,BMP3,BMP6,BMPR1B,CHRD,GREM1,MAPK12,MAPK13,MRAS,REL,SMAD6,SOSTDC1
Role of PKR in Interferon Induction and Antiviral Response	0.959	0.125	0.632	COLEC12,FOS,HSPA1A/HSPA1B,HSPA2,MAP2K6,MAPK12,MAPK13,NLRP10,NLRP4,PDGFB,PYCARD,REL,SCARA3,SCARA5,TNF,TP53,TRAF3
TGF-β Signaling	0.597	0.115	0.632	ACVR1B,BMP2,BMPR1B,FOS,INHA,MAP2K6,MAPK12,MAPK13,MRAS,PMEPA1,SMAD6
EIF2 Signaling	0	0.058	0.632	ACTA2,ACTG2,AGO4,ATF5,CCND1,DDIT3,MRAS,NOX4,PIK3R1,PIK3R3,PPP1R15A,RPL32,TRIB3
D-myo-inositol (1,4,5,6)-Tetrakisphosphate Biosynthesis	0	0.0894	0.632	ALPL,CILP,DUSP9,EYA4,G6PC3,PPFIA3,PPFIBP2,PPP1R14C,PPP2R1B,PPP2R2C,PPP2R5B,PPP3CC,PTPN13,PTPN22,PTPRF,PTPRN
D-myo-inositol (3,4,5,6)-tetrakisphosphate Biosynthesis	0	0.0894	0.632	ALPL,CILP,DUSP9,EYA4,G6PC3,PPFIA3,PPFIBP2,PPP1R14C,PPP2R1B,PPP2R2C,PPP2R5B,PPP3CC,PTPN13,PTPN22,PTPRF,PTPRN
ERK/MAPK Signaling	2.46	0.15	0.6	DUSP9,ELF3,ESR1,FOS,ITGA10,ITGA11,ITGA7,ITGAE,ITGB6,ITGB7,KSR1,MRAS,NFATC1,PAK3,PAK6,PIK3R1,PIK3R3,PLA2G12A,PLA2G3,PLA2G4A,PLA2G4E,PLA2G4F,PLA2G5,PPARG,PPP1R14C,PPP2R1B,PPP2R2C,PPP2R5B,PRKCG,PRKCI,RAC3,RAPGEF3
Chemokine Signaling	1.25	0.15	0.577	CALML5,CAMK1,CAMK2B,CCL24,FOS,GNAI1,LIMK2,MAPK12,MAPK13,MRAS,PLCB1,PLCB4
PPARα/RXRα Activation	0.77	0.113	0.577	ACVR1B,ADCY3,CHD5,GNA11,GNA15,IL1RL2,IL6,MAP2K6,MRAS,PLCB1,PLCB4,PLCH1,PLCH2,PLCL1,PLCL2,PPARA,PPARGC1A,PRKAA2,REL,RXRA,SLC27A1,TGFBR3
PKCθ Signaling in T Lymphocytes	0	0.0341	0.577	CACNA1G,CACNA1I,CACNA2D1,CACNA2D4,CACNB2,CACNG4,CAMK2B,FOS,HLA-A,MAP3K6,MAP3K9,MRAS,NFATC1,NFATC2,PIK3R1,PIK3R3,PPP3CC,RAC3,REL
Apelin Adipocyte Signaling Pathway	2.5	0.187	0.535	ADCY3,APLN,GNA11,GNAI1,GPX2,GPX3,GPX7,Gsta4,GSTA5,Gstt1,MAPK12,MAPK13,MGST1,NOX4,PPARGC1A,PRKAA2,RAC3
Reelin Signaling in Neurons	0.971	0.127	0.535	APBB1,ARHGEF16,ARHGEF4,ARHGEF9,CAMK2B,DNAH10,GRIN1,MAP1B,MAP2K6,MAP3K9,MAPK12,NECTIN3,PIK3R1,PIK3R3,VLDLR,WASF1
Fatty Acid α-oxidation	2.04	0.286	0.447	ALDH1A3,Aldh1a7,ALDH2,ALDH3A1,Aldh3b2,ALOX12B
Oxidative Ethanol Degradation III	1.55	0.179	0.447	ACSS1,ALDH1A3,Aldh1a7,ALDH2,ALDH3A1,Aldh3b2,Cyp2j9,CYP2R1,CYP2S1,CYP2U1
FcγRIIB Signaling in B Lymphocytes	1.09	0.141	0.447	CACNA1G,CACNA1I,CACNA2D1,CACNA2D4,CACNB2,CACNG4,DOK1,Ighg2b,MAPK12,MRAS,PIK3R1,PIK3R3
Non-Small Cell Lung Cancer Signaling	0.635	0.117	0.447	CCND1,CDKN2A,E2F2,E2F6,HDAC11,MRAS,PIK3R1,PIK3R3,RB1,RXRA,TP53
TNFR1 Signaling	0.478	0.115	0.447	FOS,Naip1 (includes others),PAK3,PAK6,REL,TNF
Estrogen Biosynthesis	0.41	0.111	0.447	AKR1C3,CYP1B1,CYP2S1,CYP2U1,CYP3A5
CD27 Signaling in Lymphocytes	0.381	0.105	0.447	FOS,MAP2K6,MAP3K6,MAP3K9,MAPK12,REL
Activation of IRF by Cytosolic Pattern Recognition Receptors	0.263	0.0923	0.447	IL6,ISG15,MAPK12,REL,TNF,TRAF3
Lymphotoxin β Receptor Signaling	0.246	0.0909	0.447	PIK3R1,PIK3R3,TRAF1,TRAF3,VCAM1
CNTF Signaling	0	0.0877	0.447	LIFR,MRAS,PIK3R1,PIK3R3,RPS6KA2
IL-2 Signaling	0	0.082	0.447	FOS,IL2RG,MRAS,PIK3R1,PIK3R3
Natural Killer Cell Signaling	1.64	0.136	0.392	COL10A1,COL18A1,COL1A1,COL1A2,HLA-A,HLA-E,HSPA1A/HSPA1B,HSPA2,IL12RB1,IL18R1,Klra7 (includes others),LIMK2,MAP3K6,MAP3K9,MAPK12,MAPK13,MICB,MRAS,NFATC1,NFATC2,PAK3,PAK6,PIK3R1,PIK3R3,RAC3,REL,TNFSF10
April Mediated Signaling	1.48	0.19	0.378	FOS,MAPK12,MAPK13,NFATC1,NFATC2,REL,TRAF1,TRAF3
Melanoma Signaling	1.46	0.18	0.378	CCND1,CDH1,CDKN2A,MDM2,MRAS,PIK3R1,PIK3R3,RB1,TP53
Coagulation System	1.45	0.2	0.378	A2M,F3,KLKB1,PLAUR,PROS1,TFPI,THBD
IL-15 Signaling	0	0.0208	0.378	Ighg2b,Ighg2c,IGKC,IL2RG,MAPK12,MAPK13,MRAS,PIK3R1,PIK3R3,RAC3,REL
Regulation of eIF4 and p70S6K Signaling	0	0.0894	0.378	AGO4,ITGA10,ITGA11,ITGA7,ITGAE,ITGB6,ITGB7,MAPK12,MAPK13,MRAS,PIK3R1,PIK3R3,PPP2R1B,PPP2R2C,PPP2R5B,PRKCZ
Unfolded protein response	0	0.0778	0.378	ATF6,CEBPA,DDIT3,HSPA1A/HSPA1B,HSPA2,PPARG,PPP1R15A
Death Receptor Signaling	0	0.0833	0.378	ACTA2,ACTG2,Naip1 (includes others),PARP3,REL,TNF,TNFRSF10A,TNFSF10
MIF Regulation of Innate Immunity	2.28	0.227	0.333	FOS,MAPK12,PLA2G12A,PLA2G3,PLA2G4A,PLA2G4E,PLA2G4F,PLA2G5,REL,TP53
Glioma Invasiveness Signaling	1.19	0.151	0.333	MRAS,PIK3R1,PIK3R3,PLAUR,RAC3,RHOU,RHOV,RND1,RND3,TIMP2,TIMP3
Cell Cycle: G1/S Checkpoint Regulation	0.793	0.132	0.333	CCND1,CDKN2A,CDKN2B,E2F2,E2F6,HDAC11,MDM2,RB1,TP53
Agrin Interactions at Neuromuscular Junction	0.74	0.129	0.333	ACTA2,ACTG2,AGRN,ERBB3,MAPK12,MRAS,PAK3,PAK6,RAC3
Telomerase Signaling	0.421	0.103	0.333	ELF3,HDAC11,IL2RG,MRAS,PIK3R1,PIK3R3,PPP2R1B,PPP2R2C,PPP2R5B,RB1,TP53
ICOS-ICOSL Signaling in T Helper Cells	0	0.0197	0.333	CALML5,CAMK2B,HLA-A,IL2RG,NFATC1,NFATC2,PIK3R1,PIK3R3,PPP3CC,REL
Regulation of IL-2 Expression in Activated and Anergic T Lymphocytes	0	0.0195	0.333	CALML5,FOS,MAPK12,MRAS,NFATC1,NFATC2,PPP3CC,REL,TOB1
PD-1, PD-L1 cancer immunotherapy pathway	0	0.0849	0.333	HLA-A,HLA-E,IL2RG,NGFR,PDCD4,PIK3R1,PIK3R3,TNF,TNFRSF11B
Protein Kinase A Signaling	2.12	0.128	0.309	ADCY3,AKAP6,CALML5,CAMK2B,DUSP9,EYA1,EYA2,FLNC,GDE1,GDPD1,GLI3,GNAI1,GNB4,GNG11,MPPED2,MYL7,MYL9,NFATC1,NFATC2,NGFR,NTN1,PDE3B,PDE4A,PDE7A,PDE9A,PLCB1,PLCB4,PLCH1,PLCH2,PLCL1,PLCL2,PPP1R14C,PPP3CC,PRKCG,PRKCH,PRKCI,PRKCZ,PRKD1,PTPN13,PTPN22,Ptprd,PTPRF,PTPRN,PTPRR,PTPRU,PTPRZ1,REL,SFN,SMPDL3A,Tcf7,TCF7L1,TNS2
UVC-Induced MAPK Signaling	2.27	0.216	0.302	FOS,MAPK12,MAPK13,MRAS,PRKCG,PRKCH,PRKCI,PRKCZ,PRKD1,SMPD3,TP53
IL-7 Signaling Pathway	1.32	0.154	0.302	CCND1,EBF1,FOXG1,Ighg2b,Ighg2c,IL2RG,MAPK12,MAPK13,NFATC1,PAX5,PIK3R1,PIK3R3
Gα12/13 Signaling	0	0.0902	0.302	CDH1,CDH11,CDH3,F2RL1,LPAR1,MAPK12,MRAS,MYL7,MYL9,PIK3R1,PIK3R3,REL
PEDF Signaling	1.73	0.167	0.277	ARHGAP22,BDNF,DOCK3,MAPK12,MAPK13,MRAS,PIK3R1,PIK3R3,PNPLA2,PPARG,REL,SERPINF1,TCF7L1,TP53
Amyotrophic Lateral Sclerosis Signaling	1.52	0.148	0.277	CACNA2D1,CACNA2D4,CACNB2,CACNG4,CAPN11,CAPN2,CAPN5,CAPN6,GRIA3,GRIK5,GRIN1,Naip1 (includes others),NOS1,PGF,PIK3R1,PIK3R3,TP53
Pyroptosis Signaling Pathway	1.11	0.14	0.277	GSDME,IL1A,KCNQ1OT1,MAPK12,MAPK13,NGFR,NLRP10,NLRP4,PTGER4,PYCARD,TNF,TNFRSF11B,TRAF3
Role of MAPK Signaling in Promoting the Pathogenesis of Influenza	0.648	0.115	0.277	ATP6V0E2,ATP6V1C2,LCAT,MAP2K6,MAPK12,MAPK13,MRAS,PLA2G12A,PLA2G3,PLA2G4A,PLA2G4E,PLA2G4F,PLA2G5
Dilated Cardiomyopathy Signaling Pathway	2.75	0.169	0.243	ACTA2,ACTG2,ADCY3,ADRB1,CACNA1G,CACNA1I,CACNA2D1,CACNA2D4,CACNB2,CACNG4,CAMK1,CAMK2B,CNN1,DES,DSC2,DSG2,MAPK12,MAPK13,MYH14,MYL7,MYL9,MYO18B,MYO5C,RBM20,SGCD
Corticotropin Releasing Hormone Signaling	1.81	0.148	0.229	ADCY3,BDNF,CACNA1G,CACNA1I,CACNA2D1,CACNA2D4,CACNB2,CACNG4,CALML5,FOS,GLI3,GNAI1,MAPK12,MAPK13,NOS1,NPR2,PRKCG,PRKCH,PRKCI,PRKCZ,PRKD1,SOX15
Inhibition of Matrix Metalloproteases	4.63	0.333	0	A2M,ADAM12,MMP11,MMP15,MMP17,MMP3,MMP7,RECK,SDC2,TFPI2,THBS2,TIMP2,TIMP3
LPS/IL-1 Mediated Inhibition of RXR Function	3.68	0.161	0	ACOX2,ALDH1A3,ALDH2,ALDH3A1,ALDH5A1,CHST1,CHST11,CHST15,CHST3,CPT1C,Cyp2j9,CYP2R1,CYP2S1,CYP2U1,CYP3A5,FABP5,GSTA5,GSTM5,GSTO1,HS3ST1,HS3ST3A1,HS3ST3B1,HS3ST6,HS6ST2,IL1A,IL1RL2,IL1RN,IL33,MGST1,NDST3,NGFR,NR1H4,PAPSS2,PPARA,PPARGC1A,RXRA,SLC27A1,SULT4A1,TNF,TNFRSF11B,UST
Ovarian Cancer Signaling	2.36	0.158	0	CCND1,CDKN2A,E2F2,E2F6,FZD1,FZD2,FZD8,GJA1,HDAC11,MMP7,MRAS,PGF,PIK3R1,PIK3R3,RB1,Tcf7,TCF7L1,TP53,WNT10A,WNT11,WNT3A,WNT4,WNT5A,WNT6,WNT7A
Cell Cycle Regulation by BTG Family Proteins	2.31	0.243	0	BTG2,CCND1,E2F2,E2F6,HOXB9,PPP2R1B,PPP2R2C,PPP2R5B,RB1
Polyamine Regulation in Colon Cancer	2.28	0.207	0	ALOX15,ARG1,EIF5A2,FOS,MAP2K6,MXD1,ODC1,PPARG,SAT1,SAT2,TP53,TRPC1
Apelin Cardiac Fibroblast Signaling Pathway	1.84	0.261	0	ACE2,APLN,CCN2,IL6,PRKAA2,SPHK1
Estrogen-mediated S-phase Entry	1.58	0.231	0	CCND1,E2F2,E2F6,ESR1,ESR2,RB1
Histamine Degradation	1.44	0.238	0	ALDH1A3,Aldh1a7,ALDH2,ALDH3A1,Aldh3b2
MIF-mediated Glucocorticoid Regulation	1.39	0.194	0	PLA2G12A,PLA2G3,PLA2G4A,PLA2G4E,PLA2G4F,PLA2G5,REL
Leukotriene Biosynthesis	1.39	0.267	0	DPEP2,GGT1,GGT6,LTC4S
Thyroid Cancer Signaling	1.28	0.152	0	BDNF,CCND1,CDH1,FOS,MRAS,NTF4,NTRK3,PIK3R1,PIK3R3,Tcf7,TCF7L1,TP53
Acute Myeloid Leukemia Signaling	1.17	0.143	0	CCND1,CEBPA,FLT3,IDH1,JUP,KITLG,MAP2K6,MRAS,PIK3R1,PIK3R3,REL,Tcf7,TCF7L1
Amyloid Processing	1.06	0.157	0	BACE2,CAPN11,CAPN2,CAPN5,CAPN6,MAPK12,MAPK13,MARK1
Tryptophan Degradation X (Mammalian, via Tryptamine)	1.03	0.185	0	ALDH1A3,Aldh1a7,ALDH2,ALDH3A1,Aldh3b2
Pancreatic Adenocarcinoma Signaling	0.971	0.127	0	CCND1,CDKN2A,CDKN2B,E2F2,E2F6,GPLD1,HDAC11,MAPK12,MDM2,PGF,PIK3R1,PIK3R3,PLD5,RB1,REL,TP53
Erythropoietin Signaling Pathway	0.907	0.119	0	CCND1,Eda,FOS,IL1A,IL33,IL6,MDM2,MRAS,PIK3R1,PIK3R3,PRKCG,PRKCH,PRKCI,PRKCZ,PRKD1,RAC3,REL,TNF,TNFSF10,TNFSF13B,TP53
GDNF Family Ligand-Receptor Interactions	0.827	0.132	0	DOK1,DOK6,DOK7,FOS,GFRA1,GFRA4,MAPK12,MRAS,PIK3R1,PIK3R3
Bupropion Degradation	0.728	0.16	0	CYP1B1,CYP2S1,CYP2U1,CYP3A5
Autophagy	0.532	0.103	0	ATG9B,BMP6,CALML5,DAPK2,DDIT3,DRAM1,FOS,MAPK12,NGFR,PDGFB,PIK3R1,PIK3R3,PPP2R1B,PPP2R2C,PPP2R5B,PPP3CC,PRKAA2,SLC1A5,TNF,TNFRSF11B,TP53,TRAF3
Acetone Degradation I (to Methylglyoxal)	0.529	0.125	0	Akr1c12/Akr1c13,CYP1B1,CYP2S1,CYP2U1,CYP3A5
Role of CHK Proteins in Cell Cycle Checkpoint Control	0.381	0.105	0	E2F2,E2F6,PPP2R1B,PPP2R2C,PPP2R5B,TP53
Retinoic acid Mediated Apoptosis Signaling	0.332	0.1	0	CRABP2,IFNE,PARP3,RXRA,TNFRSF10A,TNFSF10
3-phosphoinositide Degradation	0.328	0.0942	0	ALPL,CILP,DUSP9,EYA4,G6PC3,INPP4B,INPP5J,PPFIA3,PPFIBP2,PPP1R14C,PPP2R1B,PPP2R2C,PPP2R5B,PPP3CC,PTPN13,PTPN22,PTPRF,PTPRN
Angiopoietin Signaling	0.255	0.0909	0	ANGPT1,MRAS,PAK3,PAK6,PIK3R1,PIK3R3,REL
Melanocyte Development and Pigmentation Signaling	0	0.0625	0	ADCY3,KITLG,MRAS,PIK3R1,PIK3R3,RPS6KA2
ATM Signaling	0	0.0825	0	MAPK12,MAPK13,MDM2,PPP2R1B,PPP2R2C,PPP2R5B,TP53,TP73
Apoptosis Signaling	0	0.0865	0	CAPN11,CAPN2,CAPN5,CAPN6,MRAS,Naip1 (includes others),REL,TNF,TP53
Th17 Activation Pathway	0	0.0186	0	IL12RB1,IL23R,IL6,NFATC1,NFATC2,PTGER4,REL,RORA,RORC
T Cell Exhaustion Signaling Pathway	0	0.03	0	ACVR1B,FOS,HLA-A,HLA-E,IL12RB1,IL6,MAPK12,MRAS,NFATC1,NFATC2,PIK3R1,PIK3R3,PPP2R1B,PPP2R2C,PPP2R5B,PRDM1,TGFBR3
Endocannabinoid Cancer Inhibition Pathway	0.78	0.117	-0.243	ADCY3,CASP14,CCND1,CDH1,DDIT3,GNAI1,MAP2K6,NOS1,PGF,PIK3R1,PIK3R3,PRKAA2,SMPD3,Tcf7,TCF7L1,TRIB3,VIM
p53 Signaling	2.53	0.184	-0.258	ADGRB1,BBC3,CCND1,CDKN2A,DRAM1,MDM2,PERP,PIK3R1,PIK3R3,RB1,SERPINB5,SFN,TNFRSF10A,TP53,TP53INP1,TP63,TP73,TRIM29
Inhibition of ARE-Mediated mRNA Degradation Pathway	0	0.0807	-0.277	AGO4,MAPK12,MAPK13,NGFR,PPP2R1B,PPP2R2C,PPP2R5B,SFN,TNF,TNFRSF11B,TNFSF10,TNFSF13B,ZFP36L1
PTEN Signaling	1.28	0.133	-0.302	BMPR1B,CCND1,FGFR2,FOXG1,INPP5J,ITGA10,ITGA11,ITGA7,ITGAE,ITGB6,ITGB7,MRAS,NGFR,NTRK3,PIK3R1,PIK3R3,PRKCZ,RAC3,REL,TGFBR3
Sumoylation Pathway	0.854	0.126	-0.302	AR,ARHGDIG,CDH1,CEBPA,FOS,MAPK12,MDM2,RAC3,RHOU,RHOV,RND1,RND3,TP53
CDK5 Signaling	0.631	0.114	-0.302	ADCY3,BDNF,CABLES1,LAMB3,LAMC2,MAPK12,MAPK13,MRAS,NGFR,PPP1R14C,PPP2R1B,PPP2R2C,PPP2R5B
Ethanol Degradation II	2.01	0.235	-0.378	ACSS1,ADHFE1,ALDH1A3,Aldh1a7,ALDH2,ALDH3A1,Aldh3b2,DHRS9
B Cell Activating Factor Signaling	1.87	0.209	-0.378	FOS,MAPK12,MAPK13,NFATC1,NFATC2,REL,TNFSF13B,TRAF1,TRAF3
Regulation of Cellular Mechanics by Calpain Protease	1.24	0.146	-0.378	CAPN11,CAPN2,CAPN5,CAPN6,CCND1,ITGA10,ITGA11,ITGA7,ITGAE,ITGB6,ITGB7,MRAS,RB1
Crosstalk between Dendritic Cells and Natural Killer Cells	0.917	0.132	-0.378	ACTA2,ACTG2,CAMK2B,FSCN1,HLA-A,HLA-E,IL2RG,IL6,MICB,REL,TNF,TNFSF10
FLT3 Signaling in Hematopoietic Progenitor Cells	0	0.0875	-0.378	FLT3,MAPK12,MAPK13,MRAS,PIK3R1,PIK3R3,RPS6KA2
Apelin Muscle Signaling Pathway	2	0.208	-0.447	APLN,GNA11,GNA15,GNAI1,GNB4,GNG11,MRAS,PPARGC1A,PRKAA2,SLC2A4
Dopamine Degradation	1.19	0.188	-0.447	ALDH1A3,Aldh1a7,ALDH2,ALDH3A1,Aldh3b2,Sult1a1
Actin Nucleation by ARP-WASP Complex	1.11	0.14	-0.447	ITGA10,ITGA11,ITGA7,ITGAE,ITGB6,ITGB7,MRAS,RAC3,RHOU,RHOV,RND1,RND3,WASF1
Endometrial Cancer Signaling	0.521	0.117	-0.447	APC2,CCND1,CDH1,MRAS,PIK3R1,PIK3R3,TP53
ERB2-ERBB3 Signaling	0	0.0769	-0.447	CCND1,ERBB3,MRAS,PIK3R1,PIK3R3
WNT/β-catenin Signaling	9.68	0.254	-0.48	ACVR1B,APC2,BCL9,CCND1,CDH1,CDH3,CDKN2A,DKK2,DKK3,FRAT1,FZD1,FZD2,FZD8,GJA1,MDM2,MMP7,PPP2R1B,PPP2R2C,PPP2R5B,SFRP1,SFRP2,SOX11,SOX12,SOX13,SOX15,SOX2,SOX21,SOX4,SOX5,SOX6,SOX7,Tcf7,TCF7L1,TGFBR3,TP53,UBD,WIF1,WNT10A,WNT11,WNT3A,WNT4,WNT5A,WNT6,WNT7A
LXR/RXR Activation	1.28	0.138	-0.535	C3,IL1A,IL1RL2,IL1RN,IL33,IL6,LCAT,MYLIP,NGFR,NR1H4,REL,RXRA,SCD,SERPINF1,TNF,TNFRSF11B,UGT1A3
Necroptosis Signaling Pathway	1.83	0.146	-0.626	AXL,CAMK2B,CAPN11,CAPN2,CAPN5,CAPN6,MDM2,NGFR,PLA2G12A,PLA2G3,PLA2G4A,PLA2G4E,PLA2G4F,PLA2G5,PPP3CC,PYCARD,RB1,RIPK3,TNF,TNFRSF10A,TNFRSF11B,TNFSF10,TP53
Cyclins and Cell Cycle Regulation	0.86	0.131	-0.632	CCND1,CDKN2A,CDKN2B,E2F2,E2F6,HDAC11,PPP2R1B,PPP2R2C,PPP2R5B,RB1,TP53
Apelin Liver Signaling Pathway	2.8	0.308	-0.707	APLN,COL10A1,COL18A1,COL1A1,COL1A2,EDN2,MAPK12,TNF
Role of p14/p19ARF in Tumor Suppression	1.37	0.207	-0.816	CDKN2A,MDM2,PIK3R1,PIK3R3,RB1,TP53
Noradrenaline and Adrenaline Degradation	1.34	0.189	-0.816	ADHFE1,ALDH1A3,Aldh1a7,ALDH2,ALDH3A1,Aldh3b2,DHRS9
GM-CSF Signaling	0.344	0.1	-0.816	CAMK2B,CCND1,CISH,MRAS,PIK3R1,PIK3R3,PPP3CC
ERK5 Signaling	0	0.0833	-0.816	FOS,FOSL1,MRAS,RPS6KA2,SFN,WNK1
GPCR-Mediated Integration of Enteroendocrine Signaling Exemplified by an L Cell	1.77	0.173	-0.832	ADCY3,ADRB1,CCK,GNA11,GNA15,GNAI1,PLCB1,PLCB4,PLCH1,PLCH2,PLCL1,PLCL2,VIPR1
NGF Signaling	0.415	0.102	-0.905	MAP3K6,MAP3K9,MAPK12,MRAS,NGFR,PIK3R1,PIK3R3,PRKCZ,REL,RPS6KA2,SMPD3,TP53
Role of BRCA1 in DNA Damage Response	0	0.0625	-1	E2F2,E2F6,RB1,SMARCA2,TP53
PPAR Signaling	1.22	0.14	-1.069	FOS,IL1A,IL1RL2,IL1RN,IL33,MRAS,NGFR,PDGFB,PPARA,PPARG,PPARGC1A,REL,RXRA,TNF,TNFRSF11B
Coronavirus Replication Pathway	0.963	0.156	-1.134	ACE2,Ifitm1,Ifitm6,TMPRSS2,TUBA3E,TUBB3,TUBB4A
Antioxidant Action of Vitamin C	2.98	0.188	-1.213	GPLD1,GSTO1,LCAT,MAPK12,MAPK13,PLA2G12A,PLA2G3,PLA2G4A,PLA2G4E,PLA2G4F,PLA2G5,PLCB1,PLCB4,PLCH1,PLCH2,PLCL1,PLCL2,PLD5,REL,SLC2A4,TNF
Induction of Apoptosis by HIV1	0.879	0.138	-1.414	BBC3,MAPK12,Naip1 (includes others),NGFR,REL,TNF,TNFRSF11B,TP53,TRAF1
BEX2 Signaling Pathway	2.24	0.185	-1.604	BBC3,CCND1,ITGB6,LGALS1,MAP2,MAPK12,NGFR,PGF,PLXNC1,PPP2R1B,PPP2R2C,PPP2R5B,REL,Tcf7,TCF7L1
Sirtuin Signaling Pathway	0	0.0753	-1.606	ATG16L2,ATG9B,CDH1,CPT1C,EPAS1,LDHD,MAPK12,NDUFA4,NDUFA4L2,NQO1,NR1H4,PCK2,PPARA,PPARG,PPARGC1A,PRKAA2,REL,SCNN1A,TNF,TP53,TP73,TUBA3E
HIPPO signaling	0.618	0.118	-1.89	DLG3,FAT4,PATJ,PPP1R14C,PPP2R1B,PPP2R2C,PPP2R5B,SFN,TEAD2,TEAD3
Bladder Cancer Signaling	1.77	0.155	-2	CCND1,CDH1,CDKN2A,E2F2,E2F6,FGF11,FGF19,HDAC11,MDM2,MMP11,MMP15,MMP17,MMP3,MMP7,MRAS,PGF,RB1,TP53
PI3K/AKT Signaling	2.68	0.156	-2.111	CCND1,GDF15,IFNLR1,IL12RB1,IL13RA1,IL13RA2,IL17RB,IL17RE,IL18R1,IL1RL2,IL20RA,IL22RA1,IL2RG,IL31RA,INPP5J,ITGA10,ITGA11,ITGA7,ITGAE,ITGB6,ITGB7,MDM2,MRAS,PIK3R1,PIK3R3,PPP2R1B,PPP2R2C,PPP2R5B,REL,SFN,TP53
Triacylglycerol Degradation	0.59	0.123	-2.236	Ces2b,Ces2f,DAGLA,FAAH,NDST3,PLA1A,PNPLA2
SPINK1 Pancreatic Cancer Pathway	1.04	0.15	-2.333	CPA4,CPA6,CPD,F2RL1,KLK11,KLK13,KLK14,KLKB1,PRSS3
RHOGDI Signaling	5.4	0.191	-2.353	ACTA2,ACTG2,ARHGAP6,ARHGDIG,ARHGEF16,ARHGEF17,ARHGEF19,ARHGEF4,ARHGEF9,CDH1,CDH11,CDH3,ESR1,ESR2,GNA11,GNA15,GNAI1,GNB4,GNG11,GRIP1,ITGA10,ITGA11,ITGA7,ITGAE,ITGB6,ITGB7,LIMK2,MRAS,MSN,MYH14,MYL7,MYL9,PAK3,PAK6,PIP4K2A,RAC3,RHOU,RHOV,RND1,RND3,WASF1

## Sheet: TKO-intra VS MB49-intra IPA-UR
TKO-intra VS MB49-intra IPA upstream regulator
Upstream Regulator	Expr Log Ratio	Molecule Type	Predicted Activation State	Activation z-score	Flags	p-value of overlap	Target Molecules in Dataset	Mechanistic Network
beta-estradiol		chemical - endogenous mammalian	Activated	3.307		1.23e-41	A2M,ACKR3,ACOX2,ACSM3,ACTA2,ADA,ADAMTS1,ADAMTS5,ADCY3,ADGRG2,ADRB1,AGRN,ALCAM,ALDH2,ALOX15,ANGPT1,ANK1,ANKS1B,Anp32a,ANTXR1,APBB1,APCDD1,AQP1,AQP5,AR,ARC,AREG,ARG1,ARL4A,ARSA,ARSB,ART3,ATF5,ATP1B1,AVPR1A,B3GNT7,BACE2,BAMBI,BBC3,BCAT1,BDNF,BGN,BIN1,BMP2,BMPR1B,BTG2,C3,C8orf44-SGK3/SGK3,CA12,CACNA1G,CACNG4,CAP2,CAPN2,CAV1,CCDC80,CCN2,CCN5,CCND1,CDH1,CDH11,Cdkn1c,CDKN2B,CEBPA,CELF2,CISH,CLCA2,CLDN1,…	1042 (23)
TGFB1	-0.08	growth factor	Activated	3.831		6.38e-40	2610318N02Rik,9530018H14Rik,ACSM3,ACSS1,ACTA2,ACTG2,ADAM12,ADAMTS12,ADAMTS3,ADGRB1,ADGRG2,ADORA2B,AIF1L,AK1,ALDH2,ALDH5A1,ALOX12,ALOX15,AMD1,ANGPT1,ANKRD1,APLN,AQP1,ARC,AREG,ARG1,ARHGAP22,ARHGAP24,ARHGEF19,ARL4A,ASNS,ASPN,AUTS2,AXL,BAMBI,BBC3,BCAT1,BCL9,BDH1,BDNF,BGN,BIN1,BMP2,BMP6,C1R,C1S,C3,C5,CALML3,CAND2,CASP14,CAV1,CAVIN2,CBR3,CCN2,CCN5,CCND1,CD34,CDH1,CDH11,CDHR1,CDHR2,Cdkn1c,CDKN2A,CDKN2B,…	1089 (22)
TNF	3.729	cytokine	Activated	2.528		1.39e-28	A2M,Abcb1b,ABTB2,ACKR3,ACTA2,ADAMTS5,ADGRB1,ADGRG6,ADORA2B,ADRB1,ALCAM,ALDH1A3,Aldh1a7,ALDH2,ALDH3A1,AMPD3,ANGPT1,AOC3,APLN,AQP1,AQP3,AQP5,AR,ARC,ARG1,ARHGAP22,ARHGEF10L,ARHGEF17,ARHGEF4,ARSI,ATP2B4,AVPR1A,BAMBI,BBC3,BBOX1,BDNF,BGN,BMP2,BMP6,BTG2,BTG3,C3,C5,CA12,CASP14,CAV1,CAVIN3,CBR3,CCDC80,CCK,CCL24,CCN2,CCN5,CCND1,CD34,CD5,CDH1,CDH11,CDH3,CDKN2A,CEBPA,CH25H,CHST11,CHSY3,CIB2,CISH,CLDN1,CLDN4,…	862 (17)
progesterone		chemical - endogenous mammalian		0.93		5.05e-23	ACTA2,ADAMTS1,AKR1C3,ALOX15,ALPL,AMD1,AMPD3,AQP1,AR,AREG,ARL4A,ART3,ATP1B1,BCAT1,BDNF,BHLHA15,BMP2,C3,CA12,CAV1,CCN5,CCND1,CD1D,CDH1,CDH11,Cdkn1c,CDKN2A,CDKN2B,CKMT1A/CKMT1B,CLDN3,CLDN4,COL12A1,Col17a1,CP,CRYAB,CXCL6,CYP1B1,CYP3A5,DDIT3,ECE2,ENPP2,EPAS1,ERBB3,ESR1,ESR2,F2RL1,F3,FAAH,FGFR2,FKBP5,FOS,FOSL1,FOXC1,FUT9,GJA1,GJB2,GREB1,GRIA3,Gstt1,HGFAC,HLA-A,HOPX,HOXA10,HOXA11,HSPA2,ICAM1,IGFBP2,IGFB…	928 (24)
TP63	9.046	transcription regulator	Activated	2.575		8.95e-23	ACTA2,ADA,ADAMTS1,AEN,ALDH1A3,ALOX12,AREG,ARG1,AXL,BBC3,BC064078,CAVIN2,CCN2,CCND1,CDH1,CDH3,CDKN2A,CDKN2B,CEACAM1,CEBPA,CLDN3,COL5A1,CSTA,DDAH1,DKK3,DLX1,DOK1,EDN2,EFNA4,ERBB3,F3,FBN1,FDPS,FGFR2,Flg,FLRT1,FOS,FOSL1,FOSL2,FSD1L,GLB1L2,GNAI1,GPX2,GREM1,GRHL2,GRHL3,HAS3,HES1,HTRA1,IGFBP2,IGFBP3,IGFBP6,IGFBP7,IL6,ITGA7,Ivl,JAG2,KCNG1,KCNK1,KRT14,KRT5,KRT6B,KRT7,L1CAM,LAMB3,LAMC2,LIMK2,LORICRIN,MDM2,…	696 (18)
AGT		growth factor	Activated	3.487		1.52e-22	A3GALT2,ACAT2,ACE2,ACTA2,ADAM12,ADAMTS5,ADAMTSL2,ADORA2B,ALDH1A3,Aldh1a7,ALOX12,ALOX15,ANGPT1,ANGPTL2,Anp32a,APLN,ARG1,ARHGEF9,ARID3A,ATP1B1,BDNF,BGN,BMP2,BMP6,C3,CACNA2D1,Calcb,CAV1,CCBE1,CCDC80,CCN2,CCN5,CCND1,CD109,CDKN2A,CILP,CNN1,COL10A1,COL12A1,COL18A1,COL1A1,COL1A2,COL4A6,COL5A1,COL5A2,CP,CPXM1,CRABP2,Crb3,CRLF1,CSPG4,CSRP2,CTHRC1,CTSK,CXADR,DISP1,DKK3,DOK1,E2F2,ECE1,EDARADD,EDNRB,EHF,ESR1…	844 (19)
diethylstilbestrol		chemical drug	Activated	2.669		1.53e-22	ALDH1A3,ALPL,AQP3,AQP4,AR,AREG,BCAT1,C3,CCN2,CCND1,CLSTN2,COL1A1,CPXM1,CRABP2,CTSK,CXCL14,CXCL6,CYP3A5,DLG3,DNMT3B,DPT,DPYSL2,Elf5,ESR1,ESR2,F3,FBLN1,FDPS,FGFBP1,FMOD,FOS,GABRP,GGT1,GJB2,GREB1,GREM1,HLA-A,HOXA10,HOXA11,IGFBP2,IGFBP3,IGFBP6,INHA,ITGAE,JCHAIN,Krt10,KRT13,KRT15,KRT5,LGALS1,LRRK2,LTF,LUM,MDM2,MFAP2,MFAP4,MGP,Muc1,Muc4,NDRG2,OLFML2A,OSBP2,PADI4,PARD6G,PCOLCE,PDGFB,PGLYRP1,PGR,PIGR,PRD…	790 (20)
GLI1	-1.124	transcription regulator		-0.423		2.87e-21	ACTA2,AHNAK2,AKR1C3,ALDH3A1,ANKRD22,AQP5,ARC,ARL4C,ATP6V1C2,ATP9A,BNC1,C1QTNF3,C5,CA12,CAV1,CCND1,Cd24a,CDH1,CDH11,CFAP300,CLMN,COL10A1,COL1A1,CST6,DIRAS2,EIF5A2,ELAVL2,EMB,ENPP5,EPB41L4B,FAM110C,FAM43A,FHL1,FLT3,FOS,FOXQ1,GDA,GPA33,GREM2,GRIA3,HENMT1,HEPH,HES1,HHIP,HPGD,IGFBP6,IGFBP7,IL33,IL6,IQGAP2,ITGB6,ITPKB,JAG2,JUP,KITLG,KLF12,KLK11,KRT15,KRT19,LAMB3,LGALS1,LRRC1,LZTS1,MALL,MEST,MMP11,MST1R…	635 (12)
SOX2	9.152	transcription regulator	Activated	3.621		7.31e-21	ABTB2,ACKR3,AFAP1L2,ANGPT1,APCDD1,AQP4,ASPRV1,BMP6,CCN2,CCN5,CCND1,CDH1,CDKN2A,CHRD,CHST15,CHST3,CLDN7,CNFN,COL1A1,CRABP2,CST6,CXCL14,DKK3,DLX1,DNMT3B,DPPA4,DSP,ELF3,Elf5,EPB41L2,EPCAM,EVPL,FA2H,Flg,FOS,GAL3ST1,GATA3,GJA1,GLI3,GREB1,GRHL3,Hmga2,HOPX,IL6,INAVA,IRF6,IRX3,ISL1,JARID2,KHDC3L,KITLG,KLK14,KRT14,KRT17,KRT18,KRT19,KRT7,LLGL2,LORICRIN,LPAR1,LRP4,Meis1,MFSD2A,NIPAL4,NOTCH3,NTF4,OTX1,OVOL1,…	679 (17)
dexamethasone		chemical drug		-0.567		1.62e-20	Abcb1b,ACKR3,ACTA2,ACTG2,ADAM12,ADAM28,ADAMTS1,ADGRF4,ADHFE1,AKAP6,AKR1C3,ALCAM,ALDH2,ALOX15,ALPL,AMIGO2,AMPD3,ANGPT1,ANKRD1,AOC3,APLN,AQP1,AQP5,AREG,ARHGAP24,ARHGEF19,ARL4C,ASNS,ASPN,ATF7IP2,ATOH8,ATP10B,ATP1A3,ATP1B1,ATP2B4,ATP9A,BBC3,BDNF,BGN,BMP2,BNIPL,BTG2,C3,C5,CAV1,CAVIN2,CBR1,Cbr2,CBR3,CCK,CCN2,CCND1,CD34,CDH1,CDH11,Cdkn1c,CDKN2A,CDKN2B,CDYL,CEACAM1,CEBPA,CELF2,CHIT1,CILP,CISH,Clca3a1/Clc…	881 (19)
ESR2	-2.964	ligand-dependent nuclear receptor		-0.291		3.01e-20	Abcb1b,ACKR3,ADAMTS1,ADAMTS5,ANGPTL2,ANK1,AQP3,AR,AREG,ARL4A,ATF5,BAMBI,BBC3,BCAT1,BIN1,BMP2,BTG2,C3,C8orf44-SGK3/SGK3,CA12,CAPN2,CASP14,CAV1,CCN2,CCN5,CCND1,CD34,CDH1,CHST15,CLDN1,CLDN4,CNN1,COL11A1,COL13A1,COL1A1,COL1A2,CRLF1,CTHRC1,DDAH1,DNAH11,DPYSL3,ELAVL2,EMB,EMP3,ENPP2,ENPP3,EPHA3,ESR1,ESR2,EYA4,F2RL1,FAM110C,FBLN1,FBLN2,FBLN5,FBN1,FDPS,FGF19,FHL1,FMOD,FOS,FOSL2,FOXA1,FOXQ1,FSCN1,FSTL1,FZD…	968 (20)
CG		complex	Activated	2.672		8.36e-19	Abcb1b,ACTA2,ADAMTS1,AKR1C3,Aldh1a7,ANGPTL2,APCDD1,APLN,AR,AREG,ARHGAP22,BAMBI,BCAT1,BDNF,BMP2,BMP6,BMPR1B,BTG2,BTG3,C1R,C1S,CCND1,CD34,CDH1,CEBPA,CEP170,CNN1,COL11A1,CRYAB,CYP1B1,CYP2R1,CYP7B1,DNAH11,DPT,EDN2,ELAVL2,EMB,ENPP2,ENPP3,EPAS1,EPHA3,EPHA7,ESR2,F2RL1,FABP5,FAM110C,FAT4,FHL1,FOS,FOSL1,FOSL2,FZD1,GAS1,GASK1B,GJA1,GJB2,GNA15,GREM1,GREM2,HAS2,HLA-A,HLA-E,HPGD,ICAM1,IGFBP2,IGFBP3,IGFBP4,IL1…	974 (22)
KRAS	-0.76	enzyme		-1.759		1.52e-17	ADCY3,ADGRL3,AEN,AGRN,ALDOC,AMPD3,AOX1,AQP5,AREG,ARG1,ATF5,ATF6,ATP1B1,AXL,B4GALT5,BCL2L14,BDH1,BGN,BNC1,CAMK1,CAV1,CAVIN2,CCDC80,CCN2,CCND1,CDH1,CDH3,CDKN2A,CDKN2B,CEACAM1,CELSR2,CHST3,COL1A1,CRYAB,CTNND2,CXADR,CXCL14,CXCL6,DDAH1,DDIT3,DPYSL2,DSE,ENO1,EPCAM,F2RL1,F3,FBLN2,FBN1,FES,FKBP11,FOS,FOSL1,FRAT1,FSTL1,FUT10,FXYD3,GALNT1,GALNT11,GALNT18,GALNT3,GAS1,GBA,GCLM,GGT1,GJA1,GXYLT2,HES1,Hmga2,HOP…	757 (19)
mifepristone		chemical drug		-0.366		2.51e-17	Alox12e,ALOX15,ALPL,AQP1,AR,AREG,ARG1,BCAT1,C3,CAV1,CBR1,Cbr2,CCN2,CCND1,Cd24a,Cdkn1c,CEACAM1,CISH,CKMT1A/CKMT1B,CLDN3,CLDN7,COL18A1,COL5A2,CYP3A5,DKK3,EDNRB,EHF,EPCAM,EPHB3,F3,FBLN2,FKBP5,FOS,FOXA1,GJA1,HAS2,HOXA10,HOXA11,HPGD,ICAM1,IGFBP3,IL13RA2,IL6,JUP,KRT6B,LAMB3,LAMC2,LOX,LSR,LTF,MDM2,MMP3,Muc1,NOX4,NPY1R,NQO2,OGN,PC,PGLYRP1,PGR,PLA2G4A,POSTN,PRKG2,PTN,RAMP3,ROBO1,Saa3,SERPING1,SFRP1,SFRP2,…	940 (21)
tretinoin		chemical - endogenous mammalian		1.689		4.45e-17	A2M,ABCA12,ADA,ADAMTS5,ALDH1A3,ALDH3A1,ALOX12B,ALPL,APCDD1,APLN,AQP1,AR,AREG,ARG1,ASNS,ATOH8,B3GALT5,BAMBI,BMP2,BMP6,BMPR1B,BTG2,C1S,C3,CALML3,CAPN2,CASZ1,CAVIN3,CBR1,CCK,CCL24,CCN2,CCND1,CD1D,CD34,CDH1,CDKN2A,CDKN2B,CEACAM1,CEBPA,CERS3,CHKA,CHL1,CHN2,Clca3a1/Clca3a2,CLDN1,COL1A1,COL1A2,COL4A5,COTL1,CP,CRABP2,CTSK,CXCL6,CYP2R1,CYP2S1,CYP2U1,CYP4F22,DAPK2,DDIT3,DES,DHRS3,DHRS9,DKK3,DNMT3B,DPYSL3,D…	854 (17)
TWIST1	1.181	transcription regulator		-0.379		1.2e-16	ACTA2,ADAMTS1,ALCAM,AR,AXL,C3,CCK,CDH1,CDKN2A,CELSR1,CLDN4,COL1A1,DDR2,DKK3,DNM1,DPYSL3,EMP3,ENPP3,EPCAM,ESR1,FAT4,FBN2,FGFR2,FIBIN,FMOD,FOS,FOSL1,HOXD10,IGFBP4,IGFBP5,IL6,KCNN4,MRC2,NCAM1,NT5E,OSGIN1,PCDH18,PCOLCE,PDZD2,PRKD1,PROM1,PRRX2,PTPRU,PTPRZ1,S100A4,SDC3,SEMA5A,SLC29A1,SPHK1,THBS2,TIMP3,TNF,TP53,VCAN,VIM	754 (24)
ERBB2	1.319	kinase		0.628		2.26e-16	ACTA2,ADAM12,ADAMTS16,ADAMTS5,ADGRL3,Aldh1a7,ALDOC,ALOX15,ANGPTL2,AR,AREG,BTG2,CAVIN2,CAVIN3,CCDC80,CCN2,CCN5,CCND1,CD34,CDCP1,CDH1,CDH11,CDH3,CDKN2A,CDKN2B,CELSR2,CHDH,CHST3,CLDN3,CLDN4,CLDN7,CNTD1,COL18A1,COL1A1,COL5A1,COL5A2,CPD,CRIP1,Cxcl9,DDIT3,DOK1,DPT,DSE,DSG2,E2F2,EDN2,EHF,EHHADH,ELF3,Elf5,EMP3,EPCAM,EPHB2,ERBB3,ESR1,ESR2,F3,FBLN2,FOS,FOXA1,FSCN1,FSTL1,FUT10,FXYD3,GALNT11,GALNT18,GALNT3,G…	721 (16)
SMARCA4	0.316	transcription regulator	Activated	2.401	bias	3.37e-16	A2M,ACE2,ACTA2,ALDH1A3,ALDH2,ANGPTL2,ANTXR2,AREG,ARHGAP30,ARL4C,ASNS,ATP2B4,BAMBI,BIN1,CCN2,CCND1,CDH1,CDH11,CDKN2A,CDKN2B,CEACAM1,CNTN1,COL1A1,COTL1,CP,DES,DHRS9,EBF1,EFNB1,EHF,EMP3,ENO3,EPHA1,EPHB2,ESPNL,EVA1A,F3,FADS3,FAM167A,FGFBP1,FGFR2,FKBP5,FOS,FOSL2,GCHFR,GJB5,GSTO1,HENMT1,HEPH,HHIP,HLA-E,HPGD,HS3ST1,ICAM1,IFIT1,IGFBP4,IGFBP5,IGFBP7,IL1A,IL6,IRAG2,IRF6,ITGA7,KLF8,KRT15,KRT18,LAMC2,LGALS1,…	796 (24)
GATA4		transcription regulator		-0.457		4.03e-16	ACE2,ACTG2,ANKRD1,ARRDC2,ASPRV1,CA12,CCBE1,CCK,CCN2,CDKN2B,CLDN1,CLSTN2,CNFN,COL1A1,COL1A2,COX6A2,CRABP2,CTHRC1,CXCL6,DES,Elf5,EPDR1,EPHX1,ESPN,EVPL,Flg,FOS,GAS1,GATA3,GJA1,GRHL3,HES1,IGFBP5,IGFBP6,IL6,INHA,IRF6,KLK14,KRT14,KRT17,KRT7,LCN2,LORICRIN,MYL7,NFATC2,Nppb,NTF4,OGN,Orm1 (includes others),OVOL1,PGBD5,POSTN,PRDM1,PTGDS,S100A4,Serpina3g (includes others),SLC25A29,SLC8A1,SPRR1A,Sprr1b,Sprr2d…	487 (12)
lipopolysaccharide		chemical drug	Activated	3.688		4.51e-16	Abcb1b,ACE2,ACKR3,ACTA2,ADA,ADAMTS5,ADORA2B,AFF3,AK4,ALCAM,ALDH2,ALDH3A1,ALDOC,ALOX12,ALOX15,AMPD3,ANGPTL2,ANKRD1,ANKRD22,Apol7e (includes others),AQP1,AQP3,AQP4,AQP5,AR,ARC,AREG,ARG1,ARL4A,ARL4C,ARVCF,AVPR1A,AXL,B4GALT5,BAMBI,BCL9,BDNF,BGN,BMP2,BRDT,C1R,C3,C5,CALML5,CAPN2,CAV1,CCL24,CCN2,CCND1,CD1D,Cd24a,CDH1,CDH11,CEACAM1,CEBPA,CEP85,CGAS,CH25H,CHST3,CISH,CLDN1,CLIC3,COL12A1,COL1A1,COL1A2,COL4A…	843 (15)
CTNNB1	1.275	transcription regulator	Activated	3.366		5.4e-16	ACAP1,ACAT2,ACTA2,ADGRG2,AGRN,ALCAM,ALDH1A3,AOC3,APCDD1,AQP4,AQP5,AR,ARL4A,BAMBI,BBC3,BCL9,BDNF,BGN,BMP2,CACNA1G,CCN2,CCND1,CD34,CDH1,CDH11,Cdkn1c,CDKN2A,CDKN2B,CEACAM1,CEBPA,CELSR1,COL1A1,COL27A1,COL4A5,COL4A6,CRABP2,CRIP1,CTHRC1,CTNND2,Cxcl11,CXCL14,CXCL6,Cxcl9,CYP1B1,CYP7B1,DDIT3,DES,DGAT2,DIXDC1,DKK2,DOK1,EDAR,EDIL3,ENO3,ENPP2,EPCAM,EPHB2,EPHB3,ERBB3,ESR2,EYA2,FBLN2,FCAMR,FGFBP1,FOS,FOSL1,FOX…	910 (21)
FOS	2.308	transcription regulator		-1.443		5.52e-16	A2M,ADAM12,AKR1C3,ALDH1A3,APLN,AQP3,ARID3A,BCL9,BDNF,C3,C5,CAPN2,CASZ1,CCN2,CCND1,CDH1,CDH11,CELF2,COL18A1,COL1A1,COL8A2,CRABP2,CSTA,Cxcl9,DAPK2,Defb1,DSG3,EMB,ENAH,ENO1,EPAS1,F3,FBN1,FETUB,FLRT2,FOS,FOSL1,FOXA1,FOXC1,FSTL1,GAS1,GBA,GJA1,GJB6,GREB1,GSTA5,HAS2,HOOK1,HPGD,HTATIP2,ICAM1,IGFBP5,IGFBP6,IL1A,IL6,KCNN4,KIRREL3,KITLG,KRT13,KRT15,KRT8,LAMB3,LOX,Ly6m,MDM2,MGAT4A,MGST1,MMP3,MMP7,MPZL2,MSLN,…	743 (15)
estrogen receptor		group		0.827		6.04e-16	ACSS1,AXL,BDNF,C3,CA12,CAV1,CCN2,CCND1,CD5,CDH1,CDH11,CDH3,CLDN3,CLDN4,COL12A1,COL13A1,COL4A5,COL4A6,COL5A1,DSC2,DSP,ERBB3,FGFR2,FLNC,FOS,GATA3,GREB1,GSTA5,HSPA1A/HSPA1B,ICAM1,IL1A,IL6,JUP,KRT15,KRT18,KRT19,KRT7,KRT8,LAMC2,LTF,MAP1B,MAPK12,MGP,MMP15,MMP17,MSN,MUC15,NOTCH3,NT5E,OCLN,PCDH18,PCDH7,PCDHB14,PGLYRP2,PGR,PLAUR,PPARG,SAT1,SMAD6,TGFBR3,TIMP2,TIMP3,TJP3,TMEFF1,TNC,TP53,TSC22D3,UGT8,VIM,WNT…	897 (18)
TGFBR2	0.026	kinase		-1.758		9.86e-16	ACTA2,ADAMTS5,ADORA2B,ALOX12,ALOX15,AR,AREG,BACE2,BCAT1,BDNF,BGN,BMP6,CCDC184,CCN2,CCND1,CDH1,CDHR1,CDKN2A,CDKN2B,COL1A1,COL1A2,COL4A6,CRISPLD2,CRYAB,CXCL6,DGAT2,DSG2,EPAS1,EPOP,FKBP5,FMOD,FOXA1,GATM,GIPC2,GJA1,GJB2,GJB6,GPLD1,HPGD,ICAM1,IKZF2,IL1A,IL6,ITGAE,JUP,KCNH1,KRT18,KRT19,KRT7,KRT8,LGALS7/LGALS7B,LTB4R,LY6D,LY6G6C,MFSD2A,MMP3,MRC1,MXD1,ODC1,PDGFB,PDPN,PPARG,PRSS22,PTGDS,PTH1R,PTHLH,QSOX1,…	821 (19)
ESR1	2.262	ligand-dependent nuclear receptor	Activated	3.087		1.57e-15	ACKR3,ACTA2,ACVR1B,ADA,ADAMTS5,ADGRG6,AFMID,AK1,ALCAM,ANGPTL2,AQP1,AQP3,AR,AREG,ARHGEF9,ARL4D,ATF5,ATP1B1,BCAT1,BDNF,BIN1,BMP2,C3,C5,CA12,CAMK1,CAMK2B,CAP2,CAPN2,CAV1,CBLC,CCN5,CCND1,CDH1,Cdkn1c,CDKN2A,CDKN2B,CEBPA,CELSR2,CISH,CLDN1,CLDN4,CLDN8,Clec2d (includes others),CLIC3,CNN1,COL13A1,COL5A2,COTL1,CP,CRABP2,CXADR,CYP1B1,CYP7B1,DCDC2,DMP1,DSC2,DSG2,DTNA,DUSP9,EIF5A2,EML1,ENAH,ENO1,ENPP2,EPCAM,E…	1002 (21)
CEBPA	4.584	transcription regulator		-0.957		1.67e-15	A2M,Abcb1b,AKR1C3,APCDD1,APLN,AQP5,ARG1,ARL4C,ASNS,ASPRV1,BIN1,BTG2,C3,CCND1,CDH1,CEBPA,CNFN,COL10A1,COL1A1,COL1A2,CRABP2,CTSK,CYP3A5,DGAT2,EBF1,Elf5,EPHA7,EPHX1,EVPL,FHL1,Flg,FOS,FZD1,GAS1,GGH,GJA1,GLIPR1,GPR84,GRHL3,HAS2,HPGD,ICAM1,IGFBP3,IGFBP4,IL1RN,IL6,IRF6,ISG15,KLK14,KRT14,KRT17,KRT7,LCN2,LEPR,LGALS1,LORICRIN,LTF,NFATC1,NFATC2,NR1H4,NTF4,OAS2,Orm1 (includes others),OVOL1,PAX5,PLOD2,PPARA,P…	791 (18)
EZH2	-0.01	transcription regulator		-0.553		2.13e-15	ACKR3,ADRB1,ALPL,BCL11A,BCL11B,BMP2,BMPR1B,C3,CA6,CACNG4,CCND1,CDH1,CDKN2A,CDKN2B,CEBPA,CHRNB1,COL1A1,COL1A2,COL5A1,CPA6,CPD,CRISPLD2,CYP1B1,DAB2IP,DMP1,EPAS1,EPDR1,EPHA1,FBLN1,FBN1,FGF11,FKBP5,Flg,FLT3,FOXA1,FOXF2,FZD1,GATA3,GDF15,GRIK5,HDGFL3,Hmga2,HOXA10,HOXA11,HOXD10,ICAM1,IGFBP3,IL18R1,IL6,KCNK1,KITLG,KRT6B,KYAT1,LAMB3,LAMC2,LCN2,LORICRIN,LYPD6B,MAL2,Mirg,MMP7,MPZL2,NGFR,NKD2,NOX4,PDGFB,PDX1…	792 (23)
KLF4	-0.229	transcription regulator	Activated	6.036		4.99e-15	ACTA2,ADAMTS1,ALCAM,ALPL,ANGPT1,APCDD1,ARG1,ASPRV1,BCL11B,CCND1,CD34,CDH1,CDKN2B,CEBPA,CHST15,CLDN7,CNFN,COL1A1,CRABP2,CST6,DSP,Elf5,EPCAM,EVPL,EYA1,Flg,GJB2,GPA33,GREB1,GRHL3,HES1,IL6,IRF6,IRX3,KHDC3L,KLK14,KRT13,KRT14,KRT17,KRT19,KRT7,LORICRIN,MRC1,Nppb,NTF4,ODC1,OVOL1,PCDH18,PLAUR,PPARA,PRDM1,PRKG1,PROM1,RPTN,S100A14,SERPINB2,SOX2,SPHK1,SPRR1A,Sprr1b,Sprr2d,Sprr2e,Sprr2f,Sprr2g,Sprr2h,Sprr2i,S…	761 (18)
HRAS	0.82	enzyme		-0.104		5.53e-15	A2M,ALDH1A3,ALDH3A1,ANKRD1,ANTXR1,AREG,ASNS,ATP1A3,BTG2,CACNG4,CAPN2,CAV1,Cbr2,CCDC80,CCN2,CCND1,CDH1,CDH3,CDKN2A,CDKN2B,CHST11,CISH,CNN1,COL18A1,COL1A1,COL1A2,COL5A2,CRABP2,Crip2,Crisp1/Crisp3,CSRP2,CSTA,DDIT3,DIXDC1,DLX1,DNMT3B,DOK1,DUSP9,EIF5A2,EPHX1,FAM167A,FBLN2,FGFBP1,FHL1,FLRT2,FOS,FOSL1,FOSL2,FSTL1,FZD1,FZD2,GJA1,GJB2,GPX3,HAS2,HES1,HOXA11,HOXB9,HTRA1,ICAM1,Ifi202b,IGFBP4,IGFBP5,IGKC,IL13…	653 (16)
EGF	-1.112	growth factor		1.527		6.1e-15	ACOT2,ADA,ADAMTS1,ALCAM,ALOX12,ALOX15,ANGPT1,AQP3,AR,ARC,AREG,B4GALT5,BBC3,BTG2,CAV1,CAVIN2,CCN2,CCND1,CD34,CDH1,CDH11,CDKN2A,CISH,CLDN3,CLDN7,CLDN8,COL1A1,COL1A2,CRABP2,CSPG4,CXCL14,CXCL6,DDIT3,DES,DNMT3B,ELF3,ENAH,EPAS1,EPCAM,EPGN,ESR1,ESR2,F3,FAM83G,FOS,FOSL1,FOSL2,FSTL1,GAL3ST1,GAS1,GDF15,GJA1,Gsta4,HAS2,HAS3,HES1,HOXD10,HPGD,ICAM1,IDH1,IDI1,IGFBP2,IGFBP3,IGFBP4,IGFBP5,IL6,ISL1,JAG2,KRT15,KRT…	972 (18)
WNT3A	7.671	cytokine	Activated	3.403		7.26e-15	ACTA2,ADAMTS14,ADGRF1,ALDH1A3,ALPL,ANGPT1,AQP3,ATF6,ATP1B1,BBC3,BDNF,BGN,BMP2,CACNA1G,CCDC80,CCN2,CCN5,CCND1,CEBPA,COL1A1,COLEC12,CPT1C,Cxcl9,DKK2,EFNB1,EPAS1,ERBB3,FMOD,Fndc1,FOXQ1,FZD1,FZD2,GAS1,GPA33,HAS2,HAS3,HHIP,IGF2BP1,IGFBP5,IKZF2,IL1A,IL6,IRX3,KITLG,LCN2,LGALS12,LRRC17,Meis1,MMD,NCAM1,NDUFA4,NGFR,OGN,PMEPA1,PMP22,PPARG,PRDM1,PTH1R,RFLNB,RHOU,SERPINB1,SFRP2,SLC7A2,SOX4,SSTR2,TBX3,Tcf7,TFC…	729 (24)
decitabine		chemical drug	Activated	3.161		7.31e-15	ADAMTS1,ADGRB1,ADGRL2,AGRN,ANKRD1,AR,B3GALT5,BCAT1,BCL11A,BDNF,BIN1,BMP6,BTG3,CAMSAP3,CAP2,CASZ1,CAV1,CCN2,CCND1,CDH1,CDH11,CDH3,CDKN2A,CDKN2B,CHD5,CNTN1,COL1A1,COL1A2,CRABP2,CYP1B1,CYP3A5,DDR2,DHRS3,DKK2,DNM3,DNMT3B,DSG2,EFNA3,EFNA4,EFNB1,EHF,ELOVL4,EPHA3,EPHB3,ESR1,ESR2,FBN2,FES,FLNC,FOXA1,FOXC1,FOXF2,GDF15,GFRA1,GLI3,GLRB,HDGFL3,HLA-E,HOXA10,HOXB9,HPGD,HSPA1A/HSPA1B,IGF2BP1,IGF2BP2,IGFBP2,IGFB…	788 (18)
trichostatin A		chemical drug		1.701		1.41e-14	ADAMTS1,ADAMTS5,ADGRL2,AGRN,ALPL,ANGPT1,ANKRD1,AR,ARC,ARG1,ARL6IP1,ATG9B,BBC3,BCAT1,BCL11A,BDNF,BMP2,C8orf44-SGK3/SGK3,CA12,CA6,CAMSAP3,CAP2,CCND1,CD1D,CD34,CDH1,CDKN2A,CDKN2B,CEBPA,CISH,CLDN1,CNTN1,COL1A2,COLEC12,CPD,CRABP2,CXADR,CYP3A5,DDR2,DHRS3,DKK2,DNM1,DNM3,DNMT3B,DSG2,EFNA3,EFNA4,EFNB1,ELF3,ENPP2,EPHA3,EPHB3,ESR1,ESR2,F3,FBLN1,FES,FOS,FOSL2,FOXA1,FOXC1,FOXF2,GATA3,GLI3,GREB1,GRHL2,GRIN1,HD…	835 (22)
IL1B	0.301	cytokine	Activated	2.843		1.44e-14	A2M,ACTA2,ADAM12,ADAMTS1,ADAMTS3,ADAMTS5,ADORA2B,ALOX15,ALPL,AMPD3,ANGPT1,ANGPTL2,ANTXR1,AQP4,ARC,ARG1,ATF5,AVPR1A,BAMBI,BBC3,BGN,BMP2,BTG2,C1R,C3,C5,CCL24,CCN2,CCND1,Cd24a,CDH1,Cdkn1c,CEBPA,CHST6,CISH,CLDN1,COL10A1,COL1A1,CP,CRYAB,Cxcl11,CXCL6,Cxcl9,CYP1B1,CYP3A5,CYP7B1,DDIT3,E2F2,EDNRB,EGLN3,EHF,ELF3,ENPP2,EPAS1,ESR1,F2RL1,F3,FABP5,FGFR2,FKBP5,FOS,FOSL1,FZD1,GAD2,GATA3,GCHFR,GDF15,GGT1,GJA1,GNA…	683 (11)
OSM	-0.664	cytokine	Activated	2.786		2.72e-14	A2M,ACOT2,ACTA2,ADAMTS1,ADAMTS3,ADAMTS5,ADGRG6,AKR1C3,AMPD3,ARG1,ARL4A,ARL4C,ASNS,ATP2B4,ATP9A,BAMBI,BBOX1,C1R,C1S,CA6,CADM4,CCL24,CCND1,CDH1,CDH3,CEBPA,CH25H,CISH,CLDN4,COL1A1,COL1A2,CRLF1,CST6,CXADR,CXCL6,CYP1B1,CYP3A5,DHRS3,DSC2,DSG3,DYRK3,EMP3,EPCAM,EPHA1,EPHB2,ERBB3,EVPL,F3,FETUB,FOS,FOSL1,FOXC1,GJB5,HLA-A,HSPA2,ICAM1,IGFBP3,IGFBP6,IL13RA1,IL33,IL6,ITPKB,KCNG1,KLK13,KRT16,KRT17,KRT19,LCN2,LI…	826 (19)
FGF2	1.768	growth factor		-0.226		4.42e-14	ACTA2,ADAMTS5,ADGRL2,ANGPT1,AQP1,AQP3,AR,ARC,AREG,BAMBI,BBC3,BDNF,BGN,BMP2,BTG2,CAV1,CCK,CCND1,CD34,CDH1,CDH11,COL1A1,COL1A2,CRABP2,CRYAB,CSPG4,CTSK,CXCL6,DDIT3,DES,DKK2,DMP1,DNMT3B,EDNRB,EGLN3,ENO1,ENPP2,EPAS1,EPCAM,F3,FBN1,FGFR2,FOS,FOSL1,GJA1,GREM1,GRIA3,GRIK5,HAS2,HES1,ICAM1,IFNE,IGFBP2,IGFBP3,IGFBP4,IGFBP5,IL6,ISL1,LOX,MDM2,Meis1,MGP,MMD,MMP3,MPZ,MSX1,NGFR,ODC1,PDGFB,PDX1,PGF,PLAUR,Podxl,PPA…	778 (17)
IFNG	0.187	cytokine	Activated	3.448		6.09e-14	A2M,ABTB2,ACE2,ACSS1,ACTA2,ADGRG2,ADORA2B,AGRN,AIF1L,ALDH1A3,ALOX12,ALOX15,ALPL,AQP1,ARC,AREG,ARG1,ASNS,ATP1B1,AUTS2,AVPR1A,BBC3,BDNF,BMP6,C1R,C3,CAV1,CCN2,CCND1,CD1D,Cd24a,CDH1,CDKN2A,CDKN2B,CEACAM1,CEBPA,CELSR1,CELSR2,CEP85,CGAS,CH25H,CHAC1,CHST11,CHST3,CISH,CKMT1A/CKMT1B,COL1A1,COL1A2,COL5A2,CP,CRLF1,CTSK,CXADR,Cxcl11,CXCL6,Cxcl9,DDIT3,DDR2,Defb1,DEPP1,DOK1,DUOX2,DUSP9,E2F2,ECE1,EDNRB,EGLN3,EH…	694 (12)
KMT2D	-0.009	transcription regulator		0.515	bias	2.08e-13	ACOT4,ADGRG2,BTG3,CCDC91,CDYL2,CRIP1,CSPG4,DSC2,DSC3,DSG3,Eda,ENO3,FBXL21P,FHL1,FOXQ1,GJB2,GK5,GKAP1,GPRC5C,GPX7,GRHL1,GRHL3,HOPX,IKZF2,IRF6,JAG2,KRT16,KRT17,KRT23,LAMB3,LORICRIN,LOXL1,MYOM3,NAALADL2,NEU3,NT5E,PCDH7,PPARG,PPP1R26,PRSS16,RAB38,REEP6,SIX4,SMAD6,SPRR1A,STBD1,TGM1,TMEM159,TMEM53,TUSC1,Zfp459,Zfp760,Zfp945,ZNF184,ZNF23,ZNF750	409 (7)
TAF4	0.203	transcription regulator		-1.154		2.59e-13	AR,AREG,BDNF,CCN2,CCND1,CDH1,CDH11,CDH3,CLDN1,DDIT3,E2F2,EHF,EPGN,Flg,FMOD,GAS1,GJB2,GREM1,HOPX,IL1RN,KRT16,KRT6B,LORICRIN,LRRC15,LUM,MAP3K6,MMP3,MXD1,PPARGC1A,PTN,SFRP2,SPRR1A,Sprr2i,Tchh,TGM1,THBS2
IL10RA	0.593	transmembrane receptor		1.261		3.38e-13	ACSM3,ADGRL2,ALDH2,ASPN,B3GNT7,B4GALNT3,BMP2,C3,CACHD1,CD1D,Cd24a,CD34,COL14A1,CSRP2,CTSE,Cxcl9,CYP2S1,DPT,DRAM1,EDNRB,EHF,FABP5,FADS3,FAM83B,FBN1,FERMT1,FHL1,FSTL1,GDA,GNE,GSDMC,Gsta4,GSTM5,HGFAC,HLA-A,HMCN1,HPGD,Ifi47,IL12RB1,IL1A,IL1RN,IL2RG,IL6,ITGB7,KITLG,LCN2,LGALS12,LTC4S,LUM,MECOM,NDRG2,OCLN,OGN,PCOLCE,PMP22,POSTN,PPARGC1A,REPS2,RIPK3,Saa3,SCIN,SELENBP1,Serpina3g (includes others),SERPINB…	498 (10)
PAX1		transcription regulator	Inhibited	-4.899	bias	4.3e-13	ASPRV1,CNFN,CRABP2,Elf5,EVPL,Flg,GRHL3,IRF6,KLK14,KRT14,KRT17,KRT7,LORICRIN,NTF4,OVOL1,PRDM1,SPRR1A,Sprr1b,Sprr2d,Sprr2e,Sprr2f,Sprr2h,Sprr2i,SPRR3
GRB2	0.196	other	Inhibited	-4.315		5.27e-13	ACTA2,ASPRV1,CNFN,CRABP2,Elf5,EVPL,Flg,GRHL3,IL6,IRF6,KLK14,KRT14,KRT17,KRT7,LORICRIN,NTF4,OVOL1,PRDM1,SPRR1A,Sprr1b,Sprr2d,Sprr2e,Sprr2f,Sprr2h,Sprr2i,SPRR3	573 (14)
GNA15	4.136	enzyme				5.93e-13	Abcb1b,ACKR3,ACTA2,ARG1,AVPR1A,BMP3,C3,CDS1,CP,CRYAB,DDIT3,FBLN5,FHL1,FOSL1,GDA,HES1,HLA-E,HSD3B7,IL1RN,IL6,MAP2,MGST1,MICOS10-NBL1/NBL1,NOX4,ODC1,PRKAA2,PRRX2,PRSS35,Pvr,RBP1,SELENBP1,SLC29A1,SLC6A4,SORBS2,TAGLN,THBD,TRIB3,VCAN,ZFP36L1	644 (18)
HOXA10	2.027	transcription regulator		-0.094		6.41e-13	ALPL,AQP1,ARL4A,Cdkn1c,CDKN2B,CSTA,DHRS9,ENPP2,FZD1,GJA1,Gstt1,HLF,HOXA11,IGFBP3,IGFBP5,Ighg2b,IRX3,KRT15,KRT18,KRT4,LCN2,LEPR,LTF,MAP1B,MAPK12,ME1,Meis1,MEIS2,MFNG,MICOS10-NBL1/NBL1,MSN,NCAM1,NDRG2,PBX3,PDPN,PIGR,PIK3R1,PROM1,PROS1,PTGER4,RBP1,SAT1,SCD,SLC27A1,STARD6,TGFBR3,THBD,TNFSF13B,TNXB,TP53,WNT4,ZNF22
ARID1A	0.728	transcription regulator		-0.029		7.99e-13	ACTA2,ALPL,C8orf44-SGK3/SGK3,CCN5,CDH1,CEACAM1,EPCAM,ERBB3,ESR1,FGFBP1,FOXA1,FZD1,FZD2,GATA3,GREB1,HES1,IGFBP3,IL1A,KRT14,KRT16,KRT17,KRT18,KRT19,KRT4,KRT5,KRT6B,KRT7,KRT8,LGR6,PGR,SOX2,TP63,VIM,WIF1,WNT4,WNT5A,WNT6	874 (23)
molybdenum disulfide		chemical reagent	Inhibited	-2.714		8.41e-13	ACTA2,ACTG2,AGRN,AKR1C3,APLP1,CDKN2B,CLIC3,CNN1,COL11A1,COL12A1,COL1A1,COL5A1,COL5A2,COL8A2,CRYAB,CTSK,DMPK,EXTL1,FBN1,FHL1,FSTL1,GPC4,GREM1,IFIT1,IGFBP5,ITGA11,ITGA7,JUP,KRT14,L1CAM,LIMCH1,LRRC17,MEGF6,MGST1,NQO1,NREP,PLA2G4A,PODN,SERPINB2,SORT1,STEAP1,SYNPO2,TFPI2,TMEM171
JUN	0.335	transcription regulator		1.114		9.94e-13	A2M,Abcb1b,ACAT2,ACTA2,ALOX12,ANGPTL2,ANKRD1,AR,ARG1,ASNS,AXL,BBC3,BCL9,BDNF,C3,C5,CAPN2,CAV1,CCN2,CCND1,CDH1,CDH11,CDKN2A,CHL1,Clca3a1/Clca3a2,COL1A1,COL1A2,COL24A1,Crip2,CSTA,Cxcl9,CYP1B1,DOCK9,EPAS1,F3,FBLN5,FLNC,FOS,FOSL1,FOXA1,FOXC1,GJA1,GOT1,GREB1,GSTA5,HES1,HPGD,ICAM1,IGFBP2,IGFBP3,IGFBP4,IGFBP6,IGFBP7,IL1A,IL6,KRT15,KRT16,LAMB3,LORICRIN,LPAR1,MDM2,MMP3,MMP7,MPZ,MVD,NCAM1,NFATC1,Nppb,NQO1,…	884 (21)
HNRNPA2B1	0.106	other				1.31e-12	ADGRG2,ADORA2B,ARSJ,CA12,CACNB2,CDH1,CLDN1,CP,CRIP1,DSE,EDAR,ERBB3,EYA4,FHL1,FSCN1,FZD8,GDF15,GJA1,IGFBP2,IL6,JUP,KRT4,LEPR,LPAR1,MEIS2,MEST,MMD,NTRK3,PAPPA,PCSK9,PHACTR2,PLCB4,PLOD2,PPARGC1A,PRSS3,SEMA3B,SETBP1,SLC1A1,SLC2A4,SLC6A14,SNAP25,SRPX,TFPI2,VCAN,WNT4	584 (10)
TP53	-2.629	transcription regulator		1.151		1.39e-12	A2M,Abcb1b,ACSS1,ACTA2,ADA,ADAM12,ADGRB1,ADORA2B,AEN,AK1,AK4,ALDH1A3,ALDOC,ALOX15,ANGPT1,ANK1,ANKRD1,ANTXR1,AQP3,AR,AREG,ARG1,ARHGEF4,ARL6IP1,ASNS,BBC3,BCAT1,BDNF,BTG2,CAMK2B,CARD10,CAV1,CCDC80,CCN2,CCN5,CCNB1IP1,CCND1,CDH1,CDH3,CDKN2A,CEBPA,CELSR1,CKMT1A/CKMT1B,CLCA2,CNN1,COL13A1,COL14A1,COL18A1,COL1A1,COL1A2,COL5A2,COX6A2,CP,CPT1C,CRACR2B,Crip2,CRYAB,CTSK,DDIT3,DHRS9,DKK3,DLX1,DNM1,DNMT3B,DOK1,…	806 (18)
TEAD4	-1.67	transcription regulator		1.491		1.56e-12	ACTA2,AK5,BBOX1,CCK,CCN2,CCND1,CD34,CEBPA,COL5A2,DES,DGAT2,Elf5,FGFR2,FIBIN,GATA3,IGFBP5,IL13RA2,IRF6,KAZN,KLF8,LIMCH1,LOXL1,MB,NOTCH3,NUAK1,OVOL1,PCDH18,PDGFRL,POSTN,PPARG,RB1,SAMD5,SDC2,SLC2A4,TAGLN,TFAP2C,TP63
MRTFB	0.921	transcription regulator	Activated	3.624		2.65e-12	ACTA2,ACTG2,ADAMTS1,AK5,ANKRD1,BBOX1,CAVIN2,CCN2,CNN1,COL5A2,CXCL6,DDAH1,DMKN,EYA2,FADS2,FHL1,FIBIN,GSTM5,HLA-A,HPGD,Ifitm1,IGFBP5,KAZN,LCN2,LIMCH1,LOXL1,LTF,MAP2,MAPK13,Mcpt8,MYL9,NREP,NUAK1,P2RY1,PCDH18,PDGFRL,PGLYRP1,POSTN,Ppbp,RAMP1,Saa3,SAMD5,SDC2,SERPINB10,SERPINB2,SLC6A4,SYNPO2,TAGLN,ZFHX4	401 (9)
KRT14	5.839	other				2.87e-12	ARHGEF9,CXCL14,DSC2,DSC3,DSG1,DSG3,GJA1,GJB2,GJB4,GJB6,KLK11,KLK13,KLK14,KRT15,KRT16,KRT17,KRT18,KRT5,KRT6B,KRT8,MMP7
tetradecanoylphorbol acetate		chemical drug		1.224		6.44e-12	2810032G03Rik,ADAM28,ADAMTS1,ADCY3,ALDH1A3,ALOX12,AMIGO2,ANGPT1,AQP4,ARC,AREG,ARG1,ARHGAP32,ATP1A3,ATP2B4,AXL,BDNF,BMP2,BMP6,BTG2,C3,C3orf52,C5,CAV1,CCN2,CCND1,CDH1,CDKN2A,CDKN2B,CEBPA,CERK,CH25H,CLDN1,CRCT1,CSTA,Cxcl11,CXCL6,DDIT3,DES,DSG1,DSG3,E230001N04Rik,ECE1,ESR1,ESR2,F3,FAAH,Fam13a,FAM83G,FBN1,FGFBP1,FKBP5,Flg,FOS,FOSL1,FOSL2,FUT9,FZD1,GABRP,GAL3ST1,GATA3,GDF15,GJA1,GPC2,GPR87,GRHL2,GSTA5,…	774 (17)
NFKBIA	0.423	transcription regulator		1.27		6.8e-12	A2M,Abcb1b,ACKR3,ADAMTS5,AMPD3,ANKRD1,AXL,B3GALT5,BCL11A,BMP2,BTG2,C3,CARD10,CCND1,CDH1,CDH3,Cdkn1c,CH25H,COL1A2,COL5A2,CP,CRYAB,CXCL6,CYP1B1,CYP7B1,DDIT3,ECSCR,ENPP2,F3,FOS,FOXF2,FSCN1,GPR176,GPX3,GRIN1,GSTM5,Gstt1,HES1,HLA-A,HOXA10,HOXB2,ICAM1,IGFBP6,IL1A,IL1RN,IL33,IL6,IRX3,ISG15,KCNH2,KCNN4,KRT18,KRT8,LCN2,LIFR,LRIG1,MDM2,MEX3A,MGP,MMP15,MMP3,NDRG2,NID1,NOTCH3,OGN,PCDH7,PIK3R1,PMEPA1,PTPN13,P…	720 (15)
AR	7.951	ligand-dependent nuclear receptor		-0.539		1.33e-11	AKR1C3,AMD1,ANKRD1,AQP3,AR,ARG1,ARMCX2,ATP1A3,AVPR1A,BASP1,C3,CAV1,CCL24,CCND1,Cd24a,CDH1,CDH11,CDK14,Cdkn1c,CDKN2A,CDKN2B,CHRNB1,CLDN3,COTL1,CPNE8,DAB2IP,DAPL1,DERL3,DES,DMPK,DSC2,DSG2,EDN2,EDNRB,EHD3,EMB,EPAS1,EPB41L4B,EPHX1,ERBB3,ESPN,ESR1,FABP5,FGFR2,FKBP5,FOXA1,FYB2,FZD2,GDF15,GJA1,HLA-A,HOPX,HS6ST2,ICAM1,IGFBP3,IGFBP5,IL17RE,IL1A,IL6,INHA,INPP4B,KCNH2,KITLG,KLKB1,KRT14,LGALS7/LGALS7B,LRIG1,…	743 (20)
PD98059		chemical - kinase inhibitor		-1.155		1.75e-11	ACAT2,ACTA2,AMD1,ANKRD1,AR,AREG,ATF6,BBC3,BDH1,BDNF,BGN,BMP2,C3,CAV1,CCK,CCN2,CCN5,CCND1,CDH1,CDH3,CDKN2A,CDKN2B,CEBPA,COL1A1,COL1A2,CTSK,CYP1B1,DDIT3,DES,DHRS3,DSG1,E2F2,ECE1,EDNRB,EMP3,ENO1,EPAS1,F3,FAM3B,FGFBP1,FKBP5,FOS,FOSL1,GJA1,GRIN1,HAS2,Hmga2,HPGD,ICAM1,IGF2BP2,IGFBP3,IL1A,IL1RN,IL6,KRT19,KRT8,LAD1,LIFR,MB,MDM2,MMD,MMP11,MMP3,MMP7,MXD1,NOS1,Nppb,NQO1,ODC1,PC,PDGFB,PGR,PIK3R1,PLA1A,PLA2G4…	678 (17)
thioacetamide		chemical toxicant		1.292	bias	1.98e-11	ACOT2,ACTA2,ADAMTS1,AKR1C3,Anp32a,ASNS,BGN,CAPN6,CCN2,Cd24a,CDCP1,CLDN4,COL1A1,COL1A2,CP,CSRP2,DKK3,EDNRB,EHD3,ELF3,EMP3,EPHX1,FBLN5,FBN1,FOS,FSTL1,FXYD6,GATM,GDE1,GNG11,GOT1,GPX2,GPX3,IGFBP3,IL13RA2,IL6,ITGA7,LAMC2,LCN2,LGALS1,LOX,ODC1,PCOLCE,PDGFB,PLA1A,PLCB4,PMP22,PROM1,Pvr,SCPEP1,SLC34A2,SOX2,SPRR1A,TAGLN,TIMP2,TMC5,TMEM45A,TNF,UGT1A6,VSNL1,WNT5A	873 (20)
dihydrotestosterone		chemical - endogenous mammalian		0.72		2.08e-11	ACKR3,ADAMTS1,ADTRP,ALDH1A3,AMD1,AQP1,AR,AREG,ARG1,ASAP2,BASP1,BGN,BMPR1B,BTG2,CCN2,CCND1,CDH1,CEBPA,COL5A2,CST6,ENO1,EPB41L4B,ESR1,ESR2,FBXO32,FKBP5,FOS,FOXQ1,GAS1,GJB2,GPX3,GREB1,HECTD2,HLA-A,HOXD13,HPGD,HSPA1A/HSPA1B,Ifi202b,IGFBP2,IGFBP3,IGFBP4,IGFBP5,IGFBP7,IL17RB,IL1A,IL6,IQGAP2,KALRN,KCNH2,KITLG,KRT14,KRT19,KRT5,LGALS1,LOX,MARK1,MDM2,ME1,MMP3,MMP7,NOS1,ODC1,PC,PDCD4,PDE9A,PMEPA1,POSTN,PPAR…	986 (20)
SOX7	5.716	transcription regulator	Inhibited	-4.707		3.45e-11	ASPRV1,CNFN,CRABP2,Elf5,EPHB2,EVPL,Flg,GRHL3,IRF6,KLK14,KRT14,KRT17,KRT7,LORICRIN,NTF4,OVOL1,PRDM1,SOX4,SPRR1A,Sprr1b,Sprr2d,Sprr2e,Sprr2f,Sprr2h,Sprr2i,SPRR3,VCAN
Hdac		group		-0.417		4.37e-11	ADAMTS1,ADGRL3,ARC,AREG,BDNF,BMP2,CCND1,CRABP2,DDIT3,DKK3,DNMT3B,EDNRB,EYA1,FBXO32,FOS,FOSL1,FOXA1,GATA3,HOXA11,HOXD11,HPGD,HTRA1,IGFBP3,IL6,IRX3,JUP,KCNH2,LRP4,MGAT5B,MXD1,NPNT,PGF,PPARGC1A,ROBO2,RORC,SFRP1,SFRP2,SLC8A1,SMPD3,TBX3,THBS4,TNF,TNFSF10,TP63,WIF1,WNT4	871 (26)
PSMB11		peptidase	Inhibited	-3.035	bias	5.29e-11	BMPR1B,CAV1,CCND1,CD5,CLDN3,CLDN4,CLDN7,CNTN2,COL1A1,COL1A2,COL27A1,COL4A6,COL5A1,CXCL6,Cxcl9,Gm5431,HSPA1A/HSPA1B,IL18R1,IL2RG,ITGB7,L1CAM,LIFR,MAPK12,MMP3,NCAM1,NID1,OCLN,OLFML2B,PARVB,Pmaip1,PRKCZ,PRSS16,Pvr,RARRES2,ROBO2,TNFSF10,TRAF1,VCAN	532 (7)
halofuginone		chemical drug		-1.782	bias	5.76e-11	Anp32a,BGN,CCN2,Cd24a,COL1A1,COL1A2,CP,CTHRC1,CTSK,DKK3,EDNRB,EHD3,EPHX1,FBLN5,FBN1,FSTL1,FXYD6,GATM,GDE1,GNG11,GOT1,GPX3,HES1,IGFBP3,IL13RA2,IL23R,IL33,ITGA7,LGALS1,LOX,MMP3,PCOLCE,PLCB4,PMP22,PROM1,SCPEP1,SLC39A8,TAGLN,TIMP2,TNF,VCAM1,VSNL1,WNT5A	600 (15)
AHR	0.669	ligand-dependent nuclear receptor		-0.307		5.79e-11	1810008I18Rik,A2M,ACKR3,ACTA2,ADAMTS5,AFMID,ALDH2,ALDH3A1,AREG,ASPN,ATOH8,B4GALT5,BTG2,CADM4,CAMK2N2,CBR1,CBR3,CCND1,CDH1,CDKN2A,CDKN2B,CEBPA,CERS3,COL11A1,COL12A1,COL13A1,COL14A1,COL1A1,COL1A2,COL27A1,COL5A1,COL5A2,Cxcl9,CYP1B1,CYP2S1,EBF1,EGLN3,ENO1,ESR1,FBLN2,FBLN5,FBN2,FGFR2,FOS,FOSL1,GAS1,GDF15,GOT1,GREM1,GSTA5,GSTM5,HECTD2,HES1,IDO2,IL34,IL6,ITGA7,LTC4S,MPZ,NFATC2,NID1,NOTCH3,NQO1,NT5E,OCLN…	831 (19)
ZEB1	-1.751	transcription regulator	Inhibited	-2.349		7.6e-11	Abcb1b,ANKRD1,CCN2,CDH1,CDKN2A,CDKN2B,COL1A1,COL1A2,CXADR,Dnm3os,DOCK9,ESRP1,ESRP2,GATA3,GRHL2,KRT18,KRT19,LAMC2,LOX,LPCAT1,MAL2,MAP1B,MPZL2,MRC1,NRP2,PTPRZ1,RAB25,RBM47,ST14,TP63,TP73,VIM	771 (21)
CHUK	-0.401	kinase		1.072	bias	1e-10	ACKR3,AMPD3,BMP2,C3,CCND1,CH25H,CLDN1,CLDN8,COL18A1,CP,CRLF1,Cxcl11,CXCL6,CYP7B1,ENAH,ENPP2,F3,FOS,FOXF2,Gstt1,HLA-A,ICAM1,IGFBP6,IL1A,IL1RN,IL6,ISG15,KCNH2,LCN2,LIFR,MFAP5,MGP,MMP3,MXD1,NID1,OGN,OVOL1,PCDH7,PLA2G4A,RB1,RBP1,Saa3,SERPINB2,SERPINB5,SFRP1,SMOC2,TIMP3,TNF,TNFRSF11B,TNFSF13B,TP53,TP63,VCAM1	588 (11)
ETV5	-1.319	transcription regulator		0.639		1.02e-10	AGRN,ALCAM,AQP5,CAV1,CAVIN2,CCND1,CDH1,CLDN1,CLDN3,CLDN4,CLDN7,DPYSL2,GALNT3,HOPX,ICAM1,KRT13,KRT16,KRT19,KRT23,KRT7,LCN2,Mcpt1,Mcpt2,MSN,PKP2,PKP3,PMP22,RAB27A,S100A14,SCD,SLC34A2,TIMP3,TJP3	331 (7)
CAV1	-3.807	transmembrane receptor		-0.376		1.16e-10	ADGRG2,ARG1,CAV1,CCND1,CDH1,CDKN2A,CLDN7,CLDN8,EDIL3,ESR1,FOS,FOXA1,GIPC2,ICAM1,IL6,Ivl,KRT18,KRT19,KRT4,KRT6B,KRT7,KRT8,MDM2,NFATC1,NQO1,OCLN,PLA2G4A,PROM1,SLC1A1,SLC7A2,SMAD6,SOX2,SPRR1A,ST6GALNAC4,TFPI,TGFB1I1,TMPRSS11A,TNC,TNF,TP53,VCAM1,VIM,WNT6	776 (19)
PGR	4.601	ligand-dependent nuclear receptor		1.821		1.2e-10	ADAMTS1,AK4,AKR1C3,ALDH1A3,Alox12e,ALOX15,AMD1,AR,AREG,ATP1B1,CA12,CAPN2,CCN5,CCND1,CEBPA,CLDN7,DPYSL2,EFNA3,EPAS1,EPHA1,ESR1,F2RL1,F3,FKBP5,FOS,FOXC1,GATA3,GOT1,GPR160,GREB1,GRIA3,HES1,HPGD,HSPA2,ICAM1,IFIT1,IGFBP5,ISG15,KCNG1,KCNK1,KRT18,KRT5,MFAP5,NET1,NQO2,OAS2,P4HA2,PAPSS2,PGR,PLCL2,POSTN,PPARG,PRKCH,PRKG2,PRRX1,SERPINB8,SLC39A8,SNAP25,SNPH,STEAP1,TBC1D8,TM4SF1,TNC,TNF,TSC22D3,VCAN,WNT4	1036 (21)
ADAM12	4.188	peptidase		-1.709		1.29e-10	C1QTNF3,CCL24,CCN2,COL11A1,COL4A5,COL5A2,DPT,FBLN7,FBN1,GDF15,GREM1,GZMH,IGFBP3,IGFBP5,IGFBP6,IL33,ITGA7,LAMB3,LOXL4,LUM,MFAP5,MGP,MMP3,OGN,PARM1,PPARG,S100A1,SFRP2	720 (12)
S100A9	0.11	other		0.885		1.3e-10	A2M,ACSS1,ADAMTS1,ADAMTS5,ALPL,APLN,AREG,BACE2,C1S,C3,CCN5,CCND1,CDH3,Cdkn1c,CHDH,COX6A2,CP,CXCL14,DYRK3,ENPP2,ENTPD2,EPB41L4B,EPCAM,FOSL1,GJB2,ICAM1,IL33,IL6,ISG15,KCNMA1,MMP17,MMP3,MMP7,NGFR,NR1H4,NTRK3,POSTN,PRSS12,ROBO2,SEMA3B,TNF,UGT1A6,UNC5A,VCAM1,VCAN,VGF	687 (19)
IL13		cytokine	Activated	2.585		1.56e-10	ACKR3,ADA,ADAM28,ADORA2B,ALOX15,ARG1,ASPN,BDNF,BPIFC,C3,CAPN2,CCL24,CCN2,CEBPA,CHN2,CISH,Clca3a1/Clca3a2,COL18A1,COL1A1,COL1A2,CP,CTSK,CXCL6,ENPP2,EPAS1,F3,FADS1,FADS2,FAM162A,FOXA3,FXYD3,FXYD4,GATA3,GPX3,GRIN1,HRH1,HS3ST1,HTRA1,ICAM1,IL13RA1,IL13RA2,IL17RB,IL1RN,IL31RA,IL6,KCNH2,KCNJ15,KITLG,KLK11,KRT16,MAP2K6,MMP3,MN1,MRC1,NFATC1,NID1,NTN1,PDLIM2,PLA2G4A,PLXNC1,POSTN,PPARG,PPARGC1A,PRSS8,PTH1R,…	704 (15)
VCAN	-4.388	other		1.033		1.57e-10	AGRN,AOC3,BDNF,C1R,C1S,C3,CD34,CDKN2A,CRISPLD2,CXCL6,ENPP2,F3,FABP5,FBLN5,GPC6,HAS2,HAS3,ICAM1,IFIT1,IGFBP4,IL1RN,IL6,LCN2,LOXL4,MAP1B,MDM2,MSLN,NOTCH3,OAS2,OGN,OLFML2B,PCSK5,RBP1,RBPJ,RXRA,SERPING1,SMOC1,SORT1,THBD,TNF,TP53,VCAM1,VCAN,WNT4,ZNF618	636 (19)
methylprednisolone		chemical drug		0.562		1.62e-10	A2M,ADGRL2,AK4,Akr1c12/Akr1c13,AKR1C3,ANGPTL2,Anp32a,ARG1,ARL4A,ARSB,ASNS,ATP1B1,BBC3,BDH1,BDNF,CAMK1,CCN2,CCND1,Cd24a,CDH1,CDH3,CLDN3,CLDN7,DAB2IP,DHRS9,DNPH1,DSC2,DSG1,DSG3,ECE1,EDNRB,ENPP2,EPHX1,F3,FAAH,FABP5,FBLN5,FBXO32,FOS,FOXA1,FSTL1,GATM,GCHFR,GCLM,GDA,GOT1,HAL,HSD3B7,HSPA1A/HSPA1B,IDH1,IGKC,IL1A,IL1RN,IL6,ITGA7,ITGAE,JUP,KCNAB2,KLK11,KLKB1,KRT15,KRT19,LAD1,LGR4,LOX,MDM2,ME1,MGP,MMP11,MYO…	739 (19)
SB203580		chemical drug	Inhibited	-2.717	bias	1.73e-10	ACOT2,ACTA2,ALPL,AQP1,AQP4,ARG1,ATF6,BBC3,BDNF,BMP2,C3,CCK,CCN2,CCND1,CD109,Cd24a,CDH1,CDKN2A,CEACAM1,COL1A1,COL1A2,CRYAB,CTSK,CYP1B1,DDIT3,DUOX2,EDNRB,EHF,ENO1,F3,FOS,FOXQ1,GJA1,GLIPR1,Gsta4,HAS2,HAS3,ICAM1,IFIT1,IGFBP3,IL12RB1,IL13RA2,IL1A,IL1RN,IL6,ISG15,KCTD1,KRT23,LIFR,LORICRIN,MAP2K6,MAPK12,MMP3,MXD1,NKD2,NOX4,NQO1,PALLD,PATJ,PDGFB,PLA1A,PLAUR,POSTN,PPARA,PPARG,PPARGC1A,PPP1R15A,PTGDS,PTHLH…	705 (12)
BMP7	0.81	growth factor	Activated	2.546		1.99e-10	ACTA2,BMP2,CD34,CDH1,CEBPA,COL10A1,COL1A1,COL1A2,COL5A2,DSC2,DSP,EDN2,EPCAM,ERBB3,ESR1,F3,GJA1,GNG11,GREM1,ICAM1,IGFBP3,IGFBP4,IGFBP5,IGFBP6,IL1RN,IL6,LTF,Meis1,MMP3,MSN,MST1R,NCAM1,OCLN,PIK3R1,PPARG,PPARGC1A,PRDM16,S100A4,SLC2A4,SMAD6,SOSTDC1,TAGLN,VCAN,VIM,WNT11,WNT3A,WNT5A	660 (23)
IGF1	0.351	growth factor		0.085		2.01e-10	A2M,ACTA2,ADA,ADORA2B,AQP4,AXL,BBC3,BDNF,BGN,BMP2,BTG2,CAP2,CAVIN2,CCDC80,CCN2,CCN5,CCND1,CDH1,CDKN2A,CISH,CNN1,COL14A1,COL1A1,COL1A2,COL5A2,CP,CRYAB,Csprs (includes others),CXCL6,CYP1B1,DDIT3,EDN2,EPAS1,ESR1,ESR2,F3,FBLN1,FBLN2,FBXO32,Fmnl1,FOS,FOXA1,FOXG1,GRIN1,HOPX,HTRA1,ICAM1,IGFBP2,IGFBP3,IGFBP4,IGFBP5,IGFBP6,IL1A,IL2RG,IL6,INHA,KCNF1,KIF1A,LCN2,LEPR,LGALS12,LOXL3,Mcpt8,MDM2,MMP3,MPZ,NCAM1,N…	975 (19)
tetrachlorodibenzodioxin		chemical toxicant		-0.046		3.22e-10	1810008I18Rik,ACOT2,ALCAM,ALDH1A3,ALDH3A1,ANGPT1,AQP3,AR,ARL6IP1,ASNS,ATOH8,BCAT1,BDNF,CAP2,CBR1,CBR3,CCK,CCN2,CCND1,CDH1,Cdkn1c,CDKN2A,COL13A1,COL18A1,COL4A5,CYP1B1,CYP2S1,DSC2,EBF1,EMP3,ERBB3,ESR1,F3,FOS,FXYD4,GALNT1,GNG11,GRIN1,GSTA5,HDAC11,HES1,HOXD10,HSPA1A/HSPA1B,HSPA2,IDH1,IL6,ITGA7,ITGB7,JCAD,KRT14,KRT19,KRT4,KRT7,LPAR1,LTC4S,MDFI,MICOS10-NBL1/NBL1,MMP15,NQO1,ODC1,PAX5,PERP,PGR,PLA2G12A,P…	810 (19)
OGA	-0.726	enzyme		-0.275		3.41e-10	ACSS1,ADAMTS17,ADAMTS5,ADGRG2,ADGRL2,AHNAK2,ALDOC,CAV1,CAVIN2,CCBE1,CCND1,Cd24a,CDH1,Cdkn1c,CDKN2B,CEACAM1,CEBPA,CELSR1,CH25H,CLDN1,CLDN7,CMTM8,CNN1,COL10A1,CXCL6,EFNB1,EPHB3,ERBB3,FBLN1,FDPS,FGFBP1,FOXG1,FSCN1,GALNT6,GAS1,GLI3,GNE,GTF2IRD1,HMGCLL1,HPGD,HSD3B7,IGFBP3,IGFBP4,IGFBP5,IGFBP7,IL20RA,IP6K3,ITGB7,ITPKB,LRIG1,LRP4,MDM2,NDUFA4,NSDHL,PIK3R1,PLA2G4A,PRKG1,PRKG2,PROM1,PTGDS,RAB27A,RB1,S100A3…	698 (18)
PAX7		transcription regulator		0.325	bias	3.51e-10	C1QTNF3,Cd24a,CDH11,CLDN3,CRLF1,DEPTOR,EMB,EYA4,F2RL1,GBX1,IL13RA1,KCNK2,Marcks,MEST,MSLN,MYO1D,NPNT,NQO1,OLFM1,PARM1,PKIA,PPARG,PRRX1,RNF128,SEMA3E,TOB1,TRIM54
S100A8	-0.327	other		0.265		3.64e-10	A2M,ACSS1,ADAMTS1,ADAMTS5,ALPL,APLN,AREG,C1S,CCN5,CCND1,CDH3,Cdkn1c,CHDH,COX6A2,CP,CXCL14,Cxcl9,DYRK3,ENPP2,ENTPD2,EPB41L4B,EPCAM,FOSL1,GJB2,ICAM1,IL1A,IL33,IL6,ISG15,KCNMA1,MMP17,MMP3,MMP7,NGFR,NR1H4,NTRK3,POSTN,PRSS12,ROBO2,Saa3,SEMA3B,TNF,UGT1A6,UNC5A,VCAM1,VCAN,VGF	562 (14)
tazemetostat		chemical drug		-0.669		3.75e-10	ADAMTS1,ANKRD1,AR,BCAT1,BCL11A,BDNF,CAMSAP3,CAP2,CCND1,CDH1,CNTN1,CRABP2,DDR2,DHRS3,DNM3,DSG2,EFNA3,EFNA4,EFNB1,EPHA3,EPHB3,ESR1,FES,FOXA1,FOXC1,GLI3,HDGFL3,HOXA10,HOXB9,IGF2BP1,IGF2BP2,IGSF9,ISL1,KIF5C,L1CAM,LGALS1,LOX,LRIG1,MAP2,MAPK12,METRN,MSI1,MSN,MYO1B,NCAM1,NFATC1,NPNT,NQO1,OLFM1,PAK3,PGR,PHF19,PLCB1,PPP2R5B,ROBO1,SDC2,SERPINI1,SLC43A1,SOX12,STEAP2,TIAM1,TNC,TP53,TUBB3,UNC13A,VCAN	406 (7)
IKBKB	0.028	kinase	Activated	2.494		3.97e-10	AMPD3,ANKRD1,AR,BMP2,C3,CCN2,CCND1,CDH1,CH25H,CLDN1,CP,CTSK,Cxcl11,CXCL6,Cxcl9,CYP1B1,CYP7B1,ENPP2,F3,FOS,FOXF2,FSCN1,Gstt1,HLA-A,ICAM1,IGFBP2,IGFBP6,IGFBP7,IL1A,IL1RN,IL6,ISG15,KRT18,KRT8,LCN2,LIFR,MDM2,MGP,MMP3,MYO1D,NID1,OGN,PCDH7,PLA2G4A,POSTN,PTPN13,RBP1,REL,S100A4,Saa3,SERPINB2,SFRP1,TIMP2,TIMP3,Tmsb4x (includes others),TNC,TNF,TNFRSF11B,TP53,TP63,Tpm2,TRPC1,VCAM1,VCAN	622 (13)
EP300	0.472	transcription regulator		1.536	bias	4.6e-10	ACTA2,ADAM12,ANGPT1,AQP5,AR,ARHGAP24,ARHGEF10L,ATF6,BBC3,CA12,CAMK2B,CCND1,CDKN2A,CDKN2B,CEBPA,CHKA,COL1A2,CRABP2,CRISPLD2,CTSE,DHRS3,EDARADD,EPHB2,EYA2,FOS,FOSL2,FRMD4B,GATA3,GFRA1,GREB1,HDAC11,IGFBP6,IL12RB1,IL17RE,IL18R1,IL23R,IL6,IRF6,ITGB7,JUP,KCNIP3,KCTD1,KRT14,KRT16,LAMC2,LORICRIN,MDM2,MMD,MMP11,MMP7,MSX1,NPAS2,NTN1,NTRK3,PDX1,PERP,PGR,PLA2G4A,PPARA,PPARGC1A,PPFIBP2,PPM1E,PTPRF,RAPGEF3,RB1…	837 (21)
GATA3	3.098	transcription regulator	Inhibited	-2.782		5.44e-10	Aldh1a7,ASPRV1,BCL11A,BCL11B,CCND1,CDH1,CEBPA,CNFN,CRABP2,CST6,Defb1,EBF1,Elf5,ELOVL4,ESR1,EVPL,Flg,FOS,FSCN1,GATA3,GREB1,GRHL3,ICAM1,IL17RB,IL6,IRF6,ITGAE,Ivl,KLK14,KRT14,KRT17,LORICRIN,LOX,MDM2,MMP11,OVOL1,PAX5,PPARA,PPARG,PTGER4,SPRR1A,Sprr1b,Sprr2d,Sprr2e,Sprr2f,Sprr2g,Sprr2h,Sprr2i,SPRR3,TBX3,Tcf7,TGM1,TNF,VCAM1,VIM,WNT11,ZBTB16	855 (25)
GW501516		chemical drug		0.754	bias	5.85e-10	CCND1,COL5A1,CXCL6,F3,GZMH,Ifi202b,IGFBP2,IGFBP3,IGFBP5,IGFBP6,IL1A,IL6,KLK11,KRT19,KRT4,LAMB3,LTF,Orm1 (includes others),PPARA,PPARGC1A,SCD,SERPINB2,SLC27A1,Sprr2d,Sprr2e,Sprr2f,Sprr2g,Sprr2h,Sprr2i,Sprr2j-ps,TP53,VLDLR,VNN1	768 (21)
forskolin		chemical toxicant		0.721		6.27e-10	ACTA2,ACTG2,ADAMTS1,ADAMTS16,ADGRL2,ALDH3A1,ALDOC,ALPL,AQP3,AQP5,ARC,AREG,ARL4C,ATP1B1,ATP9A,BAMBI,BDNF,BTG2,CACNA1I,CAP2,CARD10,CASP14,CCK,CCN2,CCND1,CDK14,CDKN2A,CDKN2B,CERK,CNN1,COL10A1,COL18A1,COL1A1,COL1A2,Crip2,CRISPLD2,CRYAB,CYP1B1,CYP3A5,DDIT3,DHRS3,DMP1,DUOX2,DUSP9,DYRK3,EGLN3,ERFE,ESR1,ESR2,FBLN5,FGFR2,FKBP5,FLNC,FOS,FOSL1,FOSL2,GFRA1,GJA1,GPRC5C,GRIP1,GSTM5,HAS2,HAS3,HHIP,HPGD,HSPA1A/H…	710 (19)
IL4		cytokine	Activated	2.575		6.86e-10	ACTA2,ADORA2B,ALDH2,ALDOC,ALOX12,ALOX15,ARC,AREG,ARG1,ARSB,ATP1A3,AUTS2,BACE2,BCAT1,BCL11A,BDNF,BIN1,C3,CCDC184,CCL24,CCND1,Cd24a,CD5,CELF2,CHST3,CISH,Cmah,COL18A1,COL1A1,COL1A2,CRIP1,CRISPLD2,CTSK,CXCL6,Cxcl9,DDAH1,DGAT2,DSG1,DUOX2,EHHADH,EPAS1,EPHX1,EPOP,F2RL1,F3,FAAH,FADS1,FAM118B,FAM162A,FKBP5,Flg,FLRT2,FOS,FOXA1,FSCN1,GATA3,GATM,GIPC2,GJA1,GNA15,GNB4,GPLD1,HOPX,HPGD,HRH1,HSH2D,HSPA1A/HSPA1B,…	780 (16)
mir-8		microRNA	Inhibited	-2.296	bias	7.69e-10	ACE2,ACTA2,ADAM12,ADAMTS1,BBC3,BCL2L15,BMP2,CCND1,CDH1,CLDN1,CLDN3,CLDN7,EPCAM,FAT2,FGFR2,FOXF2,IL6,ITGB6,KCNK1,KITLG,KRT19,LEPR,LOX,LSR,MAPK12,MSLN,MSN,OCLN,PAK6,PERP,PGR,PHLDA3,PLAG1,Pmaip1,PPP2R1B,PROM1,PTHLH,PTPN13,RNF128,SCMH1,SOX2,TIAM1,TIMP2,TNF,TOB1,TP53,TSPAN1,VIM	734 (24)
SP2509		chemical reagent		-0.39		8.83e-10	ADAMTS1,ANKRD1,AR,BCAT1,BCL11A,BDNF,CAMSAP3,CAP2,CCND1,CDH1,CNTN1,CRABP2,Cxcl9,DDR2,DHRS3,DNM3,DSG2,EFNA3,EFNA4,EFNB1,EPHA3,EPHB3,ESR1,FES,FOXA1,FOXC1,GLI3,HDGFL3,HOXA10,HOXB9,IGF2BP1,IGF2BP2,IGSF9,ISL1,KIF5C,L1CAM,LGALS1,LOX,MAP2,MAPK12,METRN,MSI1,MSN,MYO1B,NCAM1,NFATC1,NPNT,NQO1,OLFM1,PAK3,PGR,PHF19,PLCB1,PPP2R5B,ROBO1,SDC2,SERPINI1,SLC43A1,SOX12,STEAP2,TIAM1,TNC,TP53,TUBB3,UNC13A,VCAN
Akt		group		0.888		9.65e-10	A2M,ACTA2,ADCY3,ANGPT1,ANKRD1,AQP3,AR,B4GALT5,BBC3,BMP2,BTG2,CCN2,CCND1,CDH1,CELSR2,CHST3,CP,CPD,E2F2,EPAS1,ERBB3,ESR1,F3,FBXO32,FKBP5,FOS,FOSL1,GALNT11,GALNT18,GCNT4,GXYLT2,HES1,HPGD,IGFBP2,IL6,L1CAM,LAMB3,LAMC2,LCN2,MAP2,MDM2,MGAT4A,MSI1,MSLN,NET1,NFATC1,NOS1,NOX4,NRP2,NT5E,PDX1,PGR,PLA2G4A,PPARG,PPARGC1A,PRDM16,PTGER4,PTN,PTPRF,RB1,SCD,SLC2A4,SLC6A14,SLC8A1,SOX2,SOX4,ST6GALNAC2,THBS2,TNC,TNF,T…	791 (19)
F2R	0.788	G-protein coupled receptor		0.817		1.47e-09	ANGPT1,CCN2,CCND1,CDH1,CDH11,CLDN3,COL13A1,DSP,ECE1,ESR1,F3,FGFR2,FOS,GJA1,ICAM1,IGFBP7,IL6,KRT19,KRT8,LAMB3,PGR,PLAUR,S100A4,SERPINB5,TAGLN,TFPI,TFPI2,TGFB1I1,TJP3,TP53,VCAM1,VIM	865 (20)
TAZ	0.069	enzyme	Activated	2.068		1.5e-09	ACTA2,ADAMTS1,ADAMTS5,AHNAK2,ALDOC,ANKRD1,AOX1,ARG1,AXL,BASP1,BDNF,CAV1,CCN2,CCND1,CEP85,COL1A1,COL5A1,COL5A2,CYP1B1,ENPP2,F2RL1,FBLN2,HAL,IDH1,IFIT1,IGFBP4,IL6,KRT5,LOX,LUM,MFAP5,MRC1,PDE3B,PHACTR2,PLOD2,SAMD4A,SORBS2,ST6GALNAC5,TAGLN,TFPI2,TNF,VCAM1,VLDLR,WNT11	705 (21)
TGFB3	0.107	growth factor	Activated	2.317	bias	1.7e-09	ACTA2,ACTG2,ADAM12,ASPN,CCN2,CDH1,CDKN2A,CDKN2B,COL10A1,COL11A1,COL1A1,COL1A2,COL5A1,F2RL1,FOS,FOSL2,GATA3,GJA1,HTRA1,LTC4S,MGP,MMP3,OCLN,PALLD,PLAUR,PLOD2,PPARGC1A,PTHLH,SCD,SDC3,TAGLN,TGFBR3,TIMP3,TNC,TNFRSF11B	704 (18)
NRAS	-0.015	enzyme		-0.545		1.73e-09	AGRN,AK1,ANKRD1,ATF5,ATF6,CCND1,CD34,CDKN2A,CDKN2B,CEACAM1,COL1A2,CRABP2,Crip2,CTSE,DDIT3,EPAS1,EPHX1,FBLN2,FHL1,GJA1,HLA-A,HTRA1,Ifi202b,IFIT1,IL13RA1,IL1A,IL1RN,IL6,IRX3,ISG15,JCHAIN,LCN2,LGALS1,MEST,MGP,NCAM1,NQO1,PERP,PHLDA3,PKIA,Plscr2,RBM38,RBPMS,RPS6KA2,SESN3,SLC2A4,SLC66A3,Tgtp1/Tgtp2,UGT1A6,VNN1	585 (18)
EGFR	1.083	kinase		0.126		1.75e-09	ACTA2,ADGRL3,AMD1,AR,AREG,ARG1,B4GALT5,CAV1,CCN2,CCND1,CDCP1,CDH1,CDKN2A,CELSR2,CHKA,Cma2/Mcpt9,COL1A1,COL5A2,CRYAB,CTSK,CXCL14,DDIT3,DSC2,DSG2,E2F2,EPCAM,ERBB3,ESR1,ESR2,F2RL1,F3,FBLN2,FBN1,FKBP11,FOS,FOSL1,FOSL2,GALNT18,GJA1,GXYLT2,HAS2,ICAM1,IGFBP3,IGFBP4,IGFBP5,IL13RA2,IL33,IL6,IQGAP2,ITGB6,Ivl,KCNN4,KRT16,KRT17,LAMB3,LAMC2,LCN2,LGR6,MGAT4A,MMP3,MST1R,NT5E,NUP210,ODC1,PLA2G4A,PLAUR,POSTN,PRKC…	766 (20)
NOTCH1	1.726	transcription regulator		1.582		1.85e-09	ACTA2,ANGPT1,ANKRD1,AQP3,BMP2,CCN2,CCND1,CDH1,Cdkn1c,CEBPA,CHST1,CNN1,COL1A1,COL1A2,DES,EPAS1,ERBB3,Flg,FOS,FOSL1,GATA3,HES1,HEYL,ICAM1,IGFBP2,IGFBP3,IGFBP4,IL1A,IL6,Ivl,KRT14,KRT8,LORICRIN,LOX,Mcpt8,MMP3,MPZ,MYCL,NGFR,NOTCH3,PDGFB,PPARG,PTGDS,RB1,REL,RGS5,RHOU,RND3,RORC,S100A1,TAGLN,TGFBR3,TNF,TP53,TP63,TSPAN33,WASF1,WNT4,WNT5A	558 (13)
PTC-209		chemical reagent		-1.436		2.45e-09	CAP2,CCDC80,CDKN2A,COL1A1,COL1A2,COL5A2,CRYAB,FBLN1,FBLN2,HOPX,IGFBP5,IL6,LOXL3,Nppb,PKP2,PLOD2,POSTN,RND1,SORT1,TNFRSF11B
PTH		other	Activated	2.268		3.25e-09	ADAMTS1,ALOX15,ALPL,ANGPT1,AREG,BMP2,CCN2,CCN5,CCND1,COL1A1,COL1A2,DDIT3,DMP1,FOS,FOSL2,GALNT3,GJA1,IGFBP3,IGFBP5,IL33,IL6,MGP,NDRG2,ODC1,PALM,POSTN,PTH1R,PTHLH,RAMP3,Saa3,SFRP2,SLC2A4,SLC34A1,SLC43A2,SLC8A1,SORT1,ST14,TFPI2,THBS4,TNFRSF11B,WIF1,WNT3A,WNT4,WNT7A	654 (20)
PRKAA1	0.075	kinase		-1.601		3.33e-09	ACKR3,ACTA2,ARG1,CDH3,CYP3A5,DDAH1,DDIT3,EGLN3,EPHA3,FGFR2,FKBP5,GJB2,GRIA3,Gsta4,Ifi47,IGFBP4,IL13RA1,IL17RB,IL22RA1,IL6,KLHL29,MAP2,MGST1,NDRG2,NPEPL1,OCLN,PARP3,PCOLCE,PMEPA1,PPARGC1A,PRKAA2,PTPRN,PTPRR,RHOU,RND3,SERPINI1,SORL1,TNF,TP53,TTYH1,VCAM1,ZFP36L1,ZNF462	710 (21)
PDGF BB		complex		-0.647		3.96e-09	Abcb1b,ACAT2,ACKR3,ACTA2,AREG,AVPR1A,BMP3,BMP6,C3,CCN2,CCND1,CNN1,COL18A1,CP,CRYAB,CSRP2,DDIT3,EDNRB,F3,FBLN5,FHL1,FOS,FOSL1,FZD1,FZD2,GDA,GDF15,GJA1,GREM1,HES1,HLA-E,Hmga2,HSD3B7,IGFBP4,IL6,MAP2,MGST1,MICOS10-NBL1/NBL1,MMP3,NOS1,NOX4,Nppb,ODC1,PCOLCE,POSTN,PPARG,PPP1R15A,PRRX2,PRSS35,Pvr,RBP1,RND3,SAT1,SCD,SLC1A1,SLC29A1,SLC6A4,SPHK1,TAGLN,THBD,THPO,TNC,TOB1,TP53,TRIB3,VCAM1,VCAN,ZFP36L1	686 (20)
SNAI1	1.668	transcription regulator		-1.969		4.17e-09	ANKRD1,AXL,CCN2,CCND1,CDH1,CLCA2,CLDN1,CLDN3,CLDN4,CLDN7,COL1A1,COL1A2,CXADR,DDR2,DPYSL3,EPCAM,ESPN,ESRP1,FLNC,FOS,FOSL1,GDF15,HPGD,INHA,KRT17,KRT18,KRT8,L1CAM,MSI1,OCLN,PARVB,RAB25,SLC29A1,SMAD6,SOX2,TGFBR3,THBD,TP63,VILL,VIM,WASF1	881 (21)
DGCR8	-0.018	enzyme		0.768		4.98e-09	ACTA2,ADGRG6,BDNF,CCND1,CDH1,CNN1,ERBB3,FOS,GJA1,HES1,MPZ,NCAM1,NFATC1,NGFR,PDCD4,PMP22,Pou3f1,SMOC1,SOX2,TAGLN,TNC	655 (16)
GNAQ	0.959	enzyme		-0.019	bias	5.04e-09	ADAMTS1,AK4,ANKRD1,AREG,ARG1,AVPR1A,BMP2,BTG2,CCN2,CCND1,CNN1,CSPG4,EDN2,F2RL1,FOS,FOSL1,GNA11,HAS2,IL1RN,IL6,KCNK2,MGST1,NDRG2,Nppb,PGR,PLAUR,PLCB1,PRKG2,Rnf125,SELENBP1,SH3BP5,SLC8A1,SPHK1,TGM1,THBD,Ugt1a7c,VCAM1,ZFP36L1	718 (18)
IgG		complex		-1.495		5.05e-09	AREG,ARSB,ATP1B1,C3,C5,CDKN2B,CLDN4,COL1A1,CRABP2,Cxcl9,DDIT3,DSG3,DSP,ECSCR,EFNA3,EGLN3,FABP5,FGFBP1,FOSL2,HLA-E,ICAM1,IL1RN,IL2RG,IL6,ISG15,KLK11,KRT13,KRT15,KRT16,KRT18,LCN2,LGALS1,LGALS7/LGALS7B,LY9,Marcks,MXD1,Nppb,NT5E,PDE3B,PDPN,PLAUR,PMEPA1,PPARA,PPARG,PPARGC1A,PPP1R15A,PRSS8,PTGER4,RND3,SERPINB2,SERPINF1,SNN,SPINT1,ST14,TACSTD2,Tcf7,TIGIT,TNC,TNF,TNFRSF10A,TOB1,TRAF1,TRIM29,VCAM1,VGF	703 (13)
FOXA2		transcription regulator		1.483		5.47e-09	A2M,ACTA2,ACTG2,ALOX15,AQP1,C3,C5,CCL24,CCND1,CDH1,CEBPA,CHRD,CLDN4,CNN1,CTHRC1,EPCAM,EPHX1,FABP5,FOXA1,FOXA3,GFRA4,GPRC5C,HHIP,Hmga2,HPGD,IGFBP5,IL13RA2,IL33,IL6,ISL1,LTC4S,MAP1B,MTUS1,MYL9,NR1H4,PDX1,PPARA,PPARG,PPP1R14C,PROS1,PTGDS,RORA,RORC,Saa3,SCD,SLC2A4,SMOC1,TAGLN,TMPRSS2,TNF,Tpm2,UST,WNT5A,WNT7A	844 (25)
Histone h3		group		1.067	bias	5.87e-09	ACKR3,ACOT4,ADGRB1,ADRB1,ANK1,AQP5,ARHGEF17,BBC3,BDNF,BTG3,CACNA1G,CAV1,CCND1,CD1D,CDH1,CDK14,CDKN2A,CDKN2B,CEACAM1,CEBPA,COL1A2,COL4A6,CSPG4,CYP3A5,DAB2IP,DDIT3,EML5,ENO3,EPHB3,ESR1,FGFR2,FKBP5,Flg,FOS,FOXA1,GATA3,GCNT4,GKAP1,GRIK5,HES1,Hmga2,HOXA10,HOXA11,ICAM1,IGFBP2,IGFBP3,IGFBP4,IL1A,IL6,INHA,L1CAM,LORICRIN,LRRC55,MDM2,Meis1,MEIS2,MPZ,MTUS1,NHLRC1,OSGIN1,PADI3,PALLD,PAX5,PDGFB,PDX1,PGR,PIGZ,…	765 (18)
MM-589		chemical reagent		-1.691		7.06e-09	CAP2,CCDC80,COL1A1,COL1A2,COL5A2,CRYAB,FBLN1,FBLN2,HOPX,IGFBP5,IL6,LOXL3,Nppb,PKP2,PLOD2,POSTN,RND1,SORT1,TNFRSF11B
POU5F1		transcription regulator		0.459		7.32e-09	ACKR3,ALDOC,ANGPT1,APCDD1,ASPRV1,B3GNT7,BMP2,CASP14,CCND1,CDH1,CHST15,CLDN7,CNFN,CRABP2,CST6,DLX1,DNMT3B,DSP,Elf5,ENO1,EPCAM,EVPL,Flg,FOXA1,GATA3,GREB1,GRHL3,HOPX,IGF2BP1,IL6,IRF6,IRX3,ISL1,JARID2,KHDC3L,KLK14,KRT14,KRT17,KRT18,LORICRIN,LOXL1,Meis1,MSX1,NCAM1,OTX1,OVOL1,PCDH18,PDX1,PMEPA1,PPARA,PROM1,PYCARD,SOX2,SPRR1A,Sprr1b,Sprr2d,Sprr2e,Sprr2f,Sprr2g,Sprr2h,Sprr2i,SPRR3,TBX3,TEAD2,TFCP2L1,TGM1…	744 (17)
MRTFA	0.13	transcription regulator	Activated	2.625		7.78e-09	ACTA2,ACTG2,ANKRD1,CAVIN2,CCN2,CCN5,CDKN2A,CNN1,CXCL6,DDAH1,DMKN,DSG1,EYA2,FADS2,FHL1,FIBIN,FOS,GSTM5,HLA-A,HPGD,ICAM1,Ifitm1,LCN2,LTF,MAP2,MAPK13,Mcpt8,MYL9,Nppb,NREP,P2RY1,PGLYRP1,PGR,Ppbp,RAMP1,Saa3,SERPINB10,SERPINB2,SLC6A4,SYNPO2,TAGLN,TNC,Tpm2,VCAM1,ZFHX4	656 (16)
NKX2-1		transcription regulator		-0.78		7.78e-09	AQP1,AQP5,AREG,BDH1,BTG3,C5,CDKN2B,CEBPA,EDIL3,ENPP2,EPHB3,FOXF2,FOXQ1,FXYD3,GRHL2,Gsta4,HLA-A,Hmga2,IGFBP6,KITLG,LCN2,MREG,MTUS1,NECTIN3,PARD6B,PC,PDPN,PGLYRP1,Plscr2,PRRX2,QSOX1,Saa3,SCARA3,SCD,SCN7A,SLC34A2,SLC6A14,SOX2,Tcf7,TNC,TP63,TSPAN7,UGT8,WNT11,WNT4
MYC	-0.151	transcription regulator	Activated	3.29		9.01e-09	ACSS1,ADAMTS1,AFMID,ALCAM,AMD1,ANGPT1,APCDD1,AQP1,AR,ARG1,ARHGAP22,ARL6IP1,ASNS,ASPRV1,AXL,BBC3,BCAT1,BDNF,BIN1,CAPN2,CAV1,CCND1,CDH1,CDKN2A,CDKN2B,CEBPA,CHKA,CHRNB1,CHST15,CLDN1,CLDN7,CNFN,COL14A1,COL1A1,COL1A2,COL5A1,COL5A2,CPD,CRABP2,CRIP1,Crip2,Crisp1/Crisp3,CRYAB,CSPG4,CSRP2,CST6,DDIT3,DNMT3B,DNPH1,DSP,E2F2,EBF1,Elf5,ENO1,EPCAM,EPHB3,EVPL,F3,FABP5,FADS2,FBLN2,FBLN5,FBN1,FBN2,FBXO32,FKBP5,Flg…	939 (19)
EPAS1	2.621	transcription regulator	Activated	2.622	bias	9.03e-09	ALDOC,APLN,AREG,ARG1,AXL,BBC3,CA12,CAV1,CCN2,CCN5,CCND1,CDCP1,CEBPA,CHKA,CKMT1A/CKMT1B,CLDN1,COL10A1,CYBRD1,DDIT3,DGAT2,DPYD,EGLN3,ENO1,FBLN2,FHL1,FOS,GAL3ST1,GCHFR,GJA1,ICAM1,IGFBP3,IGFBP5,IL6,L1CAM,LOX,MB,NEU3,NT5E,P2RY1,PDGFB,PGF,PLOD2,PPARG,PTPRZ1,PVT1,SLC29A1,SLC2A4,SOX15,SOX2,SPHK1,TAF9B,TMEM45A,TNFRSF11B,TP53,VCAM1	734 (20)
cisplatin		chemical drug		1.55		9.99e-09	A2M,A3GALT2,Abcb1b,ACTA2,ADAMTS1,AHNAK2,ALDH1A3,ANK1,ANKRD1,AQP1,AQP3,ARHGEF10L,ASNS,ASRGL1,BBC3,BTG2,CAPN2,CAPN6,CAV1,CCN2,CCND1,CDCP1,CDH1,CDKN2A,CDKN2B,CEBPA,CENPS/CENPS-CORT,CHKA,CLDN4,CLIP4,CLSTN3,COL1A1,CP,CXCL14,DDIT3,DHRS3,DRAM1,ECE1,ELF3,EMP3,ERBB3,ESR1,F3,FADS3,FOS,FOSL1,GAS1,GDF15,GGT1,GKAP1,GPR87,GPX2,HAP1,HDGFL3,HEYL,ICAM1,IGFBP3,IL1A,IL6,IRAG2,ISYNA1,ITGA7,KCNK5,KLF12,KRT19,LAMB3,LA…	610 (14)
PRKAA2	5.798	kinase		-0.767		1.13e-08	ACTA2,CDH1,CEBPA,CYP3A5,DDAH1,DDIT3,FGFR2,GATA3,GRIA3,Gsta4,Ifi47,IGFBP4,IL13RA1,IL17RB,IL22RA1,IL6,KLHL29,MGST1,NDRG2,NOS1,NOX4,NPEPL1,PARP3,PCOLCE,PPARG,PPARGC1A,PRDM16,PTPRN,SERPINI1,SORL1,TNF,TP53,TTYH1,VIM,ZFP36L1,ZNF462	700 (22)
MAPK14	0.39	kinase		0.665		1.15e-08	ACTA2,ADCY3,ANKRD1,AREG,ATP2B4,BMP2,CCND1,CDH1,CDKN2A,COL10A1,COL1A1,CRYAB,Cxcl11,Cxcl9,Defb1,F3,FDPS,FGFBP1,FOS,FOSL2,GJA1,GREM1,HAS2,ICAM1,IL6,KITLG,MAP2K6,MMP3,NFATC1,NGFR,Nppb,PLA2G5,PLAUR,Pmaip1,PPARGC1A,SIGIRR,SLC8A1,SOX2,SPHK1,TAGLN,TIMP2,TNF,TP53,Tpm2,TRPA1,VCAM1,WIF1	776 (18)
IKBKG	-0.802	kinase	Activated	2.162	bias	1.15e-08	AMPD3,BBC3,BMP2,C3,CH25H,CLDN8,CP,CXCL6,CYP7B1,ENPP2,EPAS1,FOS,FOXF2,Gstt1,HLA-A,ICAM1,IGFBP6,IL1A,IL1RN,IL6,ISG15,KCNH2,LCN2,LIFR,MGP,NID1,Nppb,OGN,PCDH7,PPARA,PPARG,Saa3,SERPINB2,SFRP1,TNF,TNFSF10,TRPC1	597 (12)
levodopa		chemical - endogenous mammalian		-0.351		1.15e-08	ACTA2,AI987944 (includes others),ALPL,AMIGO2,APLP1,ARC,ARHGEF19,AXL,B3GALT5,BBC3,BICC1,CA12,CACNB2,CASZ1,CBR3,CCND1,Cdkn1c,CHAC1,CHST11,CIB2,Clec2d (includes others),CLIP4,CMTM8,COTL1,DCAKD,DGAT2,DIXDC1,DMKN,DOC2B,ECE1,EDNRB,FAAH,FAM114A1,FAM189A1,FAM81A,FBLN1,FBLN2,FDPS,FES,FKBP5,FOS,FOSL1,GKAP1,GNE,GRIN1,HACD4,HLA-A,HS6ST2,HTATIP2,IGFBP2,IGFBP5,KCNK1,Krt10,KYAT1,LAT2,LORICRIN,LRRC1,MEIS2,MFSD2A…	211 (5)
GATA2	1.741	transcription regulator		1.498		1.2e-08	ABCA13,AK1,ANGPT1,ANGPTL2,AR,C11orf97,CCDC68,CCND1,CD34,CEBPA,CEP126,Cma2/Mcpt9,Col17a1,CPT1C,CSTA,E2F2,EPHA3,FCHO1,FYB2,GABRP,GATA3,GDA,GFRA1,Gm3383 (includes others),GPX3,GRTP1,GUCA2A,HHEX,Hmga2,HOXA10,ICAM1,IGFBP7,IL6,INKA2,ITGAE,KRT13,LCN2,LTB4R,LTF,LYPD6B,Mcpt1,Mcpt2,Mcpt8,MCTP2,MGST1,MYO18B,PDE9A,PGR,PHLDA3,PPARG,Ppbp,PRSS3,SAMD5,SEL1L3,SERPINB10,SERPINB2,SOX2,SPNS3,SSTR2,Stfa1 (includes ot…	591 (13)
Y 27632		chemical drug		-0.017		1.3e-08	ACTA2,ADA,AXL,BBC3,BMP2,CCN2,CDH1,CDKN2A,CDKN2B,CEBPA,COL10A1,COL12A1,DPYSL2,FOS,HAS2,ICAM1,IL6,PERP,PPARG,SOX5,SOX6,TAGLN,TNF,TP53,VCAM1,VIM	607 (20)
DSCAM		other	Activated	3.176		1.33e-08	ATF5,CEBPA,CNTN1,CNTNAP1,EFNA3,EFNA4,KCNK6,L1CAM,MAP2,NEURL1B,NOS1,NOTCH3,NREP,PAX5,PDGFB,PLCB1,PLXNC1,PRKCH,RGMA,ROBO2,SEMA3E,SFRP1,SLC1A1,SLC29A4,TUBB3,TUBB4A,UNC5A,VGF,VIM
PTK2	-0.801	kinase	Activated	2.277		1.33e-08	ACTA2,CCND1,COL1A1,COL1A2,CSPG4,DSP,FOS,IL6,KRT14,KRT18,KRT8,Mcpt1,MMP7,Nppb,OCLN,PALLD,PCOLCE2,PRRX1,SERPINB1,TIMP3,TNC,TP53,VCAM1	612 (20)
SS18	0.592	transcription regulator		1.5	bias	1.39e-08	CACNA1G,CAMK2B,CRLF1,DUSP9,EPHB3,FAM43A,FGFR2,GPR137B,JAG2,MSX1,NFATC1,NGFR,PDGFB,RAB40B,SLC16A3,SLC34A2,SOX2	204 (5)
HLX	1.249	transcription regulator		0		1.42e-08	ANKRD1,AREG,BMP2,Cd24a,CD34,CDKN2A,CLDN1,CYP1B1,FER1L6,GDF15,HES1,ICAM1,KYNU,PAPPA,PRDM1,RB1	471 (7)
PRKCD	0.389	kinase		-0.007		1.56e-08	ARHGAP32,C3orf52,CCND1,CDKN2A,COL1A1,COL1A2,DDIT3,FBN1,FOS,FOSL1,FOSL2,FZD1,GDF15,GPR87,GRHL2,HRH1,ICAM1,IL1RN,IL2RG,IL6,JCAD,JCHAIN,LAMB3,LORICRIN,MPZ,MSI1,NAV2,ODC1,OSR2,PALMD,PDCD4,PPP1R15A,PROM1,SERPINB2,SETBP1,SMAD6,SOX2,SPHK1,TNF,TNFRSF11B,TP53,TRAF1,TRPC1,TTC9,VCAM1	701 (17)
cycloheximide		chemical reagent		1.224		1.75e-08	Abcb1b,ADRB1,AQP1,AQP4,AQP5,AR,AREG,ATP2B4,BDNF,BTG2,CAV1,CCK,CCN2,CCND1,COL1A1,COL1A2,COL5A1,Cxcl9,CYP3A5,ESR1,ESR2,FOS,FOSL2,GCLM,GJA1,GNAI1,GOT1,GREB1,ICAM1,IFIT1,IGFBP2,IGFBP4,IGFBP5,IGFBP6,IL1A,IL1RN,IL6,KSR2,LCN2,MMP11,MMP7,MXD1,Nppb,NQO1,OGN,PDGFB,PERP,PGR,PIGR,PLAUR,PPARG,PRDM1,PSCA,PTGDS,PTHLH,PTPN13,RXRA,SCD,SERPINB10,SERPINB2,SLC12A4,Tgtp1/Tgtp2,THBD,THRB,TNF,TNFRSF10A,TNFRSF11B,TNFSF1…	698 (15)
CBX7	-2.335	other		-0.645	bias	1.83e-08	ANKRD1,AREG,BMP2,CDH1,CDKN2A,CLDN1,CYP1B1,FER1L6,GDF15,KYNU,PAPPA,PRDM1
miR-199a-5p (and other miRNAs w/seed CCAGUGU)		mature microRNA	Inhibited	-3.04	bias	1.84e-08	ACTG2,BGN,C3,CASP14,CDH1,CELSR1,COL1A1,COL4A5,ISG15,KRT17,LAMC2,LCN2,MMP7,MYL9,NECTIN1,PADI4,PIGR,RND1,TAGLN,TGFB1I1,TGFBR3,TMPRSS2,WNT6,WNT7A,ZBTB16
GATA6	0.001	transcription regulator		-1.921		2.03e-08	ACTA2,ALOX15,AQP5,ARG1,ASPRV1,C1R,CAV1,CNFN,CRABP2,DPPA2,DPPA4,Elf5,ENGASE,EVPL,Fcna,Flg,FOXA1,FOXA3,GRHL3,HES1,IRF6,KLK14,KRT14,KRT17,KRT7,LORICRIN,MRC1,Nppb,NTF4,OVOL1,PPARG,PRDM1,Saa3,SCD,SORBS3,SOX2,SOX7,SPRR1A,Sprr1b,Sprr2d,Sprr2e,Sprr2f,Sprr2h,Sprr2i,SPRR3,TAGLN,TBX3,TNFSF10	413 (7)
BMP4	0.92	growth factor	Activated	3.584		2.1e-08	ACTA2,BMP2,CCND1,CDH1,CDKN2A,CEBPA,CNN1,DEPP1,ELF3,EPCAM,FGFR2,FOXN1,GABRP,GATA3,GJA1,GREM1,HES1,HOPX,HTRA1,IL6,INHA,ITGB6,KRT23,KRT7,L1CAM,MFAP5,MMP3,MSX1,MUC15,MXD1,NCAM1,NGFR,OVOL1,PGF,POSTN,PPARG,PRKCH,PRR5,SALL3,SMAD6,SOX2,SPINT1,TAGLN,TBX15,TBX3,TFAP2C,TNFRSF11B,TP53,TP63,VTCN1,WNT5A	936 (22)
PPARG	4.651	ligand-dependent nuclear receptor		0.433		2.55e-08	Abcb1b,ACTA2,ALOX12,AQP3,ARG1,ARL4D,BDH1,BIN1,C3,CAV1,CAVIN2,CCN2,CCND1,CDH1,Cdkn1c,CEBPA,CERS3,COL1A1,COL1A2,CPLX2,CRABP2,CXCL14,CXCL6,DGAT2,DHRS3,EDN2,EGLN3,EHHADH,EPAS1,EPHX1,FABP5,FDPS,FOSL1,FZD1,GDF15,HEBP1,HES1,HSD3B7,ICAM1,IDH1,IGFBP3,IGFBP5,IGFBP6,IGFBP7,IL33,IL6,KLK11,KRT18,KRT19,LAMB3,LY6D,MAP2,ME1,MGST1,MMP3,MRC1,MVD,MYH14,NOX4,OCLN,ODC1,PC,PCK2,PDE3B,PDX1,PLA2G3,PPARA,PPARG,PPARGC1A,P…	753 (20)
mir-223		microRNA		1.272		2.59e-08	ABCA13,ACTA2,ALCAM,AMPD3,ASPRV1,CCND1,CD34,Clec2d (includes others),EYA1,GASK1B,Glrp1,GSTM5,ICAM1,Ifitm6,IL1A,IL1RN,IL6,INPP5J,MCTP2,MREG,MYO1D,NDRG2,NQO1,PADI4,PDX1,PGAP1,POSTN,RAB38,RIPK3,Serpina3g (includes others),SERPINB2,SLC29A1,SLC2A4,SMOC1,SOX6,Stfa3,TOB1	738 (24)
SMO	1.238	G-protein coupled receptor		0.618		2.83e-08	ALCAM,BGN,CCND1,COL27A1,DIXDC1,EPCAM,FBLN2,FOXF2,FZD2,HHIP,KRT5,LUM,NCAM1,NFATC1,NRP2,OGN,PPARG,PRDM1,PRSS35,SOX2,SOX5,TNFRSF10A,TNIK,VCAM1,VCAN,WIF1,WNT6	608 (15)
EHMT1	0.356	transcription regulator		1.181	bias	2.92e-08	ALDH2,C3,CDH1,CILP,CP,EYA4,FRAT1,GRAMD4,GTF2IRD1,HES2,IL6,LCN2,MEGF9,MGST1,MSLN,Nppb,PKP2,RXRA,SAT1,SCARA5,SCMH1,SCNN1A,SDSL,SELENBP1,SLC4A11,SYNC,Tcam1,TDRKH,TJP3,TNF,TNS2,UNC13B
MAPK1	0.057	kinase		-0.443		3.05e-08	ADAM12,ANTXR2,AR,ARC,ARSB,ATP1B1,BCL11A,BDNF,C1S,CAPN2,CAV1,CCDC80,CCN2,CCND1,CDH1,CISH,CRABP2,CSTA,DEPTOR,DMP1,DNAH7,DSE,EGLN3,ENO3,EPCAM,ESR1,FAT2,FBXO32,FES,FLNC,FOS,FOSL2,GATA3,GRAMD1B,HLA-E,HOXA11,IFIT1,IGFBP6,IGFBP7,IL12RB1,IL1RN,IL6,ISG15,KRT17,LAD1,LGALS1,LOX,MAL2,MAPK13,NFATC1,NT5E,NUP210,OAS2,OLFML2A,PDGFB,PLA2G4A,PLA2G4F,PLA2G5,POSTN,PRKG1,PROS1,PRSS12,SCNN1A,Serpina3g (includes others…	779 (20)
indomethacin		chemical drug		0.408		3.06e-08	A2M,A3GALT2,ADAMTS1,ADAMTS5,ALOX15,ANGPT1,ASNS,BDNF,BTG2,CAPN2,CAPN6,CCND1,CD34,CDH1,CEBPA,CLDN1,CLDN4,CP,ELF3,EMP3,FOS,GBA,GDF15,GPX2,HAS2,IL17RB,IL1A,IL6,KRT8,LAMC2,LCN2,MRC1,NGFR,NOS1,OCLN,PGR,PLA1A,PLA2G4A,PLAUR,PPARA,PPARG,Ppbp,PROM1,PTGER4,Pvr,RXRA,SLC34A2,TACR1,TFPI2,TNF,TP73,VCAN,VIM	808 (18)
EFNA3	4.871	kinase		1.886		3.18e-08	ABCA12,CCN2,CRABP2,DSG1,EFNA3,FABP5,FOSL1,ITGB6,KRT13,KRT16,KRT18,KRT4,KRT7,NT5E,PKP1,PTHLH,SPRR3,TGM1
doxorubicin		chemical drug		1.439		3.2e-08	A2M,A3GALT2,ADAMTS1,ADORA2B,AR,AREG,ASB11,ASNS,BBC3,BTG2,CAPN6,CCN2,CCND1,CDCP1,CDK14,CDKN2A,CLDN4,CP,CXCL6,DDIT3,DES,DRAM1,E2F2,ELF3,EMP3,ESR1,F3,FBLN1,FOS,GDF15,GLIPR1,GPR132,GPX2,IGFBP4,IGFBP6,IGFBP7,IL6,KRT18,KRT5,KRT8,LAMC2,LCN2,MDM2,MICB,MRC1,MYO6,NCAM1,NOTCH3,NOX4,Nppb,NQO1,NT5E,NTN1,ODC1,OSGIN1,PANK1,PERP,PIK3R3,PLA1A,PLAUR,Pmaip1,PMEPA1,PRKAA2,PTGDS,Pvr,PVT1,SDC2,SERPINB5,SFN,SLC19A2,SLC…	681 (15)
Sos		group				3.3e-08	ADAM12,AKR1C3,ALDH1A3,APLN,AQP3,ARID3A,CASZ1,CRABP2,DAPK2,Defb1,DSG3,ENAH,FETUB,FLRT2,FOS,GBA,GJB6,HOOK1,IGFBP5,KCNN4,KRT13,Ly6m,MGST1,MMP3,MPZL2,MXD1,MYO5B,NET1,NSDHL,ODC1,PDPN,Pmaip1,PMEPA1,PTH1R,PTPRZ1,RAPGEF3,RBP1,RGMA,RIPK4,S100A3,SCD,SEMA3B,SEMA3E,SLURP1,SNN,STX11	211 (7)
laquinimod		chemical drug	Activated	2.257	bias	3.46e-08	AK4,Apol7e (includes others),CABLES1,CDH1,COL13A1,CYP1B1,DPEP2,EVA1A,FKBP5,IDO2,LAD1,LPAR1,LTC4S,Mcpt1,MGARP,MPZL2,OLFML2A,PALMD,PGF,PMP22,RIPK4,SCIN,SERPINB10,SERPINB2,SERPINB8,SPINT1,STBD1,TPH1,TTC9,UGT1A6,WNT4
4-hydroxytamoxifen		chemical drug		0.76		3.5e-08	ANGPTL2,AQP3,AREG,C3,CCN2,CCND1,CDH1,CDKN2A,CEBPA,CLDN4,CYP1B1,DDIT3,DUSP9,EDN2,EPHA1,ESR1,FOS,FOSL2,FOXA1,GSTA5,HEBP1,HOXD11,IGFBP3,IL6,KRT13,KRT19,LORICRIN,MICOS10-NBL1/NBL1,NOTCH3,PAK6,PGR,PPARGC1A,PPP1R15A,PRKCH,PTGER4,RB1,RND1,SLC39A8,SPHK1,THRB,TM4SF1,TNF,TP53	717 (18)
TEAD1	-1.595	transcription regulator		1.51	bias	3.53e-08	ACTA2,AK5,BBOX1,CCN2,CCND1,COL5A2,DES,FIBIN,IGFBP5,KAZN,LIMCH1,LOXL1,MB,MSLN,Nppb,NUAK1,PCDH18,PDGFRL,POSTN,RB1,SAMD5,SDC2,TAGLN,TP63	654 (17)
CBX5	-0.387	transcription regulator	Inhibited	-2.892	bias	3.88e-08	AKR1C3,ALDH3A1,ANKRD22,BCL11A,CEACAM1,CPA4,CYP1B1,FGFBP1,FOXA1,FOXQ1,GASK1B,GCHFR,GRHL3,HDGFL3,HENMT1,HOXA13,ITGA7,LAMB3,LCN2,MAL2,MMP7,MUC20,PODXL2,PPARG,PPFIBP2,RNF39,RORA,SELENBP1,TACSTD2,TM4SF1,TMEM30B,TP53,Zfp345 (includes others),ZNF616	36 (2)
BMP10		growth factor		1.605		4.25e-08	A2M,ALDH1A3,ALOX12,ANGPT1,APLN,AQP1,BDH1,Cdkn1c,COL12A1,COL1A1,COL1A2,FGFR2,FOS,GRHL1,HLA-A,HPGD,ICAM1,IGFBP7,LCN2,LEPR,MMP3,NCAM1,PTN,Serpina3g (includes others),SMAD6,TBX20,VCAM1,VCAN	420 (7)
SOX9	-0.979	transcription regulator		-0.644		4.35e-08	ADAMTS1,ADAMTS14,AR,CCN2,CELSR2,COL10A1,COL1A1,Elf5,FGFBP1,FOS,FZD2,GUCA2A,HES1,KRT15,MMP15,NFATC1,PHYHIP,PPARG,PTGDS,S100A3,S100A4,SDK2,SMPD3,SOSTDC1,SOX4,SOX5,THBS2,TIMP2,VNN1,WIF1,WNT11	755 (23)
valproic acid		chemical drug		0.735		4.47e-08	ACSS1,AKR1C3,ALOX12,AMPD3,ANTXR2,AR,ATF6,Atp10d,ATP2B4,BDNF,Bmyc,BRDT,BSPRY,C8orf44-SGK3/SGK3,CA12,CAP2,CAVIN2,CCND1,CDH1,CEBPA,CH25H,CHKA,CPT1C,CRLF1,CXADR,CYP1B1,Cyp2j9,CYP2R1,CYP2U1,CYP39A1,DDIT3,EHHADH,ESR1,FAM107A,FDPS,FOXC1,FSCN1,GCLM,GPX7,GREB1,GRHL2,HSD3B7,ICAM1,IDI1,IL1A,IL6,LIPN,LOXL3,Marcks,MICB,MVD,MYCL,NCAM1,NQO1,NSDHL,PAQR7,PDGFB,PDZK1IP1,Plscr2,PNPLA2,PPARA,PPARG,PPP2R2C,PRKCZ,PRKD…	967 (22)
CCN5	7.699	growth factor		0.221		4.52e-08	ACTA2,CCN2,CCND1,CDH1,CEBPA,CLDN1,DSP,ESR1,FOXA1,GATA3,IGFBP7,JUP,KRT18,KRT8,LAMB3,LAMC2,PPARG,SLC2A4,TGFBR3,VIM	709 (21)
SMARCA5	0.142	transcription regulator		-1.805		4.78e-08	1700048O20Rik,AEN,ATP2B4,CDH1,CELSR1,CRIP1,DYRK3,EPHB2,FKBP5,GFRA1,Gm4737,GRIA3,HES1,HLA-A,IGFBP4,IL17RB,MPZL2,OSGIN1,PADI4,PHLDA3,PLAC8,Pmaip1,RPS6KA2,SEMA4A,SERPINB1,SMOC1,SYNGR1,TDRD5,Tgtp1/Tgtp2,TUBB3,VWCE,ZMAT3,ZNF442,ZNF616
vancomycin		biologic drug		0		5.13e-08	A2M,A3GALT2,ACTA2,ADAMTS1,ADORA2B,ADRB1,AGMO,AK1,ALCAM,ASNS,BMP6,C3,CAPN6,CCND1,CDCP1,CLDN4,CP,DAGLA,ELF3,EMP3,EPB41L2,FOS,GARNL3,GFRA4,Gm3383 (includes others),GPX2,IGFBP5,IL6,LAMC2,LCN2,LGALS1,MRC1,MYO1B,NAV2,NOX4,NPNT,NUAK1,PLA1A,PTGDS,PTPRZ1,Pvr,SCD,SDC3,SLC34A2,SOX4,TMC7,TNF,VIM	809 (24)
Notch		group		0.786		5.63e-08	ACTA2,ADAM12,ANKRD1,CDH1,CDKN2B,CNN1,CRIP1,EPCAM,GATA3,GATM,GFRA1,HES1,HEYL,IDH1,IL13RA1,IL17RB,IL6,INPP5J,KCNK6,LRRK2,LTB4R,MEX3A,NET1,NFATC1,NOTCH3,PTPRF,REPIN1,SMAD6,SORL1,SOX2,SSTR2,SVIP,TAGLN,TGM1,TNF,TP63,ZNF704	750 (20)
SMAD3	-1.701	transcription regulator		1.804		5.69e-08	ACTA2,ADAM12,ALPL,ANKRD1,AREG,ARHGAP22,ARHGAP24,ARID3A,ASPN,BGN,BMP2,BMP6,C3,CCN2,CCND1,CDH1,CDH11,CDKN2A,CDKN2B,COL10A1,COL1A1,COL1A2,CRISPLD2,DDIT3,DEPTOR,DES,ESR1,ESR2,FBN2,FOS,FZD8,GATA3,HAS2,HHEX,IL6,INHA,LPAR1,LUM,MBOAT2,MXD1,NET1,Orm1 (includes others),PC,PCSK5,PDGFB,PMEPA1,PPARGC1A,PTHLH,SOX2,SPHK1,SSTR2,TAGLN,TBX3,THBS4,TIMP3,TNC,TNF,VIM	806 (20)
gefitinib		chemical drug		0.251		5.78e-08	ADAMTS1,ANO9,ARC,AREG,BTG2,C3,CCND1,CDH1,CELSR2,COL1A1,EPGN,FGFR2,FOSL1,FRAT1,FSCN1,GJA1,IGFBP5,KRT19,LIFR,LTF,MAP2K6,MMP11,MMP15,MMP3,Muc1,NOX4,NRP2,OIT3,PLAUR,PPARG,PRKCG,S100A14,Stfa1 (includes others),Sult1a1,TIMP2,TIMP3,TNF,TNFSF10,TP53INP1,TRAF1,VILL,VIM,Wfdc18	758 (21)
PPARGC1A	-5.774	transcription regulator	Inhibited	-2.154		5.8e-08	A2M,ADAMTS1,ADAMTS5,AK1,ASPN,BBC3,BDH1,C3,Cabp1,CCN2,COL1A2,CPXM1,CXCL14,CYP3A5,DPT,EPAS1,FBLN1,FBLN2,FBXO32,FDPS,FIBIN,FOS,GDF15,GFRA1,GPC6,IGFBP3,IGFBP5,IGFBP6,IGFBP7,IL1A,IL1RN,IL6,INHA,INPP5J,KCNK1,KYAT1,LIFR,LUM,MAL,MAP2K6,MB,ME1,MFAP5,MMP15,MSI1,Nppb,NR1H4,NSDHL,ODC1,OGN,PCK2,PCSK5,PDGFRL,PDPN,PIK3R1,PNPLA2,PODN,POSTN,PPARA,PPARGC1A,PRKAA2,PTN,RXRA,Saa3,SCD,SEMA6A,SLC2A4,SLC39A14,SOX2,TGFBR…	631 (16)
FGF1	-0.794	growth factor		-1.453		5.88e-08	CCN2,CCN5,CCND1,CDH1,CDH11,CPXM1,Fndc1,FOS,FZD1,FZD2,FZD8,GCLM,GSTM5,HAS2,Hmga2,ICAM1,IKZF2,IL6,LRRC17,NOTCH3,NQO1,ODC1,PMEPA1,POSTN,RFLNB,RHOU,SERPINB1,SLC7A2,SOX2,SSTR2,Tcf7,TIMP3,TNF,VCAM1	676 (19)
DMD	0.881	other		0.176		5.95e-08	ANKRD1,AQP4,BGN,BTG2,CACNA2D1,CAMK2B,CLIP4,Cmah,COL1A2,COL23A1,DES,EPB41L4B,FBXO32,GALNT17,GATM,GRHL1,GSDME,IP6K3,KCNMA1,KRT18,KY,MALL,MAP3K9,MAP7,Marcks,Mt3,NDRG2,NOS1,NQO2,PKD1L1,PLA2G4E,POSTN,PPARGC1A,PPP1R14C,RAP1GAP2,SCIN,SERPINB1,SGCB,SGSH,SLC2A4,SLC9A2,SORT1,SYNC,Tmsb4x (includes others),TRIM44,TTLL7,VIM,XK
calcitriol		chemical drug		0.169		5.99e-08	ACAT2,ADHFE1,AFAP1L2,ALPL,AR,AREG,ARG1,ATP2B4,BCAT1,C3,CCND1,CDH1,CEBPA,CENPS/CENPS-CORT,CISH,Clec2d (includes others),CLMN,CTSK,Cxcl11,CXCL6,Cxcl9,CYB5R1,DDAH1,EHF,EPHB2,ERBB3,ESR1,F2RL1,F3,FAM107A,FBN1,FBN2,FBXL2,FDPS,FOS,GATA3,HES1,HPGD,IDH1,IGFBP3,IGFBP5,IL1A,IL1RN,IL23R,IL6,ISG15,ISL1,ITGB7,KCNH1,KLK13,KRT23,KSR2,LCN2,LGALS1,LPAR1,LRRC17,LTF,MAL,MECOM,MRC1,NCAM1,NDUFA4,NFATC1,NME4,NOX4,OCLN,…	956 (19)
8-bromo-cAMP		chemical reagent	Activated	2.099	bias	6.41e-08	ADCY3,ALDH2,ARG1,ARSA,ARSB,AVPR1A,BBC3,BMP2,CAPN2,CAV1,CCN2,CCND1,CDKN2B,CEBPA,COL10A1,COL11A1,COL4A6,COL5A1,COL5A2,CTSK,CYP1B1,ENAH,ERBB3,ESR1,FLNC,FOS,FOSL1,FZD2,FZD8,GJA1,GNAI1,GPX3,HPGD,IL12RB1,IL6,INHA,IQGAP2,ITGA11,ITGA7,KITLG,KRT18,KRT8,LAMB3,LEPR,LIFR,LOX,MDM2,MMP7,MSX1,NOS1,NQO1,ODC1,P4HA2,P4HA3,PCK2,PDE3B,PDE4A,PDGFB,PDX1,PGR,PIK3R1,PIP4K2A,PLCB1,PPARG,PPARGC1A,PPP2R1B,PRICKLE2,PTGFR,SA…	965 (19)
STAT5A	-0.729	transcription regulator	Activated	2.697		6.46e-08	A2M,AKR1C3,ALDH3A1,ANKRD22,AR,BCL11A,CCND1,CDH1,CEACAM1,CEBPA,CISH,CPA4,CYP1B1,EGLN3,EPAS1,ESR1,ESR2,FGFBP1,FOS,FOSL2,FOXA1,FOXQ1,GASK1B,GCHFR,GRHL3,HDGFL3,HENMT1,HOXA13,ICAM1,Ifitm1,IL6,Klra7 (includes others),KRT5,KSR1,LAMB3,LCN2,MAL2,MDM2,MMP7,MUC20,PODXL2,PPARG,PPFIBP2,PRDM1,RNF39,RORA,S1PR5,SELENBP1,SETBP1,SLC34A2,TACSTD2,TM4SF1,TMEM30B,TNF,TP53,TRAF1,TRAF3,Wfdc18	760 (18)
1810019D21Rik	3.82	other		-0.655		6.88e-08	Abcb1b,ADAMTSL3,AK5,AREG,EFNA3,ESRP2,GPR87,IL13RA2,INKA2,KCNH2,Mcpt8,PADI1,PALMD,Ppbp,RAPGEF3,SLC4A11,THBD,TMEM44,UGT1A6,WNT7A,ZNF365
ZBTB16	-2.221	transcription regulator		-0.211		8e-08	Alox12e,BMP2,CCND1,Cd24a,CD34,COL1A1,CPT1C,CSGALNACT1,DHRS3,EMB,EYA2,F2RL1,GALNT6,GATA3,GATM,GOT1,HOXD10,HOXD11,HOXD13,HPGD,IDO2,IL12RB1,IL17RB,IL18R1,IL1A,IL23R,IL6,IRF6,ITGAE,LTB4R,ME1,NDST3,ODC1,PAX5,PDGFB,PIK3R1,PIK3R3,PLA2G5,PPARA,REL,RORA,RORC,SCD,SOX13,TNF,TSC22D1,TSC22D3,ZBTB16	837 (23)
LY294002		chemical drug	Inhibited	-4.374	bias	8.07e-08	ACKR3,ACSM3,ACTA2,ADAMTS1,AQP3,AR,ART3,BBC3,BDNF,BMP2,CCN2,CCND1,CDH1,CDKN2A,CDKN2B,CEBPA,CLDN4,COL10A1,COL1A1,COL1A2,CP,Cxcl11,CXCL6,Cxcl9,DDIT3,EDIL3,EPAS1,ERBB3,ESR1,F3,FLRT2,FOS,FOSL1,FOXC1,Fxyd2,GDF15,GJA1,GPR137B,Gsta4,HAS2,HES1,ICAM1,IDI1,IGFBP2,IGFBP3,IGFBP5,IL1A,IL1RN,IL6,INHA,INPP4B,JUP,LAMB3,LAMC2,LCN2,LOXL1,MAP2,MDM2,ME1,MEIS2,MPDZ,MXD1,MYEF2,NQO1,NTRK3,PIK3R1,POSTN,PPARG,PTN,PTPRU,Ra…	648 (15)
STAT3	0.796	transcription regulator	Activated	2.002		9.07e-08	A2M,ACTA2,ALDH1A3,ALOX15,AREG,ARG1,C5,CCN2,CCND1,CDH1,Cdkn1c,CDKN2A,CDKN2B,CEACAM1,CEBPA,COL1A1,COL1A2,COL5A1,CTSK,CXCL6,Cxcl9,DDIT3,DNMT3B,ENPP2,EPAS1,ESR1,ESR2,F3,FLT3,FOS,FOXA3,FSCN1,GATA3,GJA1,GLIPR1,HAS2,HLA-A,HOXA10,ICAM1,Ifi202b,IFIT1,IGFBP5,IKZF2,IL12RB1,IL13RA2,IL18R1,IL1A,IL1RN,IL23R,IL6,ISG15,ITGB6,KRT17,LAMB3,LCAT,LEPR,LGR4,LOX,LTF,MAP2,MMP3,MMP7,MRAS,Muc1,Mx1,NFATC1,NFATC2,NOTCH3,NOX…	741 (15)
HTT	0.274	transcription regulator		1.644		9.1e-08	ACAT2,ACOT2,ACTA2,ADAMTS5,AGRN,ALDOC,AMD1,Anp32a,AQP1,ATP1A3,ATP6V0E2,BASP1,BBC3,BCL11B,BDNF,BMP3,BTG3,C1QTNF3,C1R,CA12,CAMK2B,CAVIN3,CBR1,CCK,CCN2,CCND1,Cd24a,CDH11,CEBPA,CHKA,CLDN1,CLDN6,COL18A1,COX6A2,CPLX2,CRYAB,CSN3,DDIT3,DKK3,DLG3,DNM1,EBF1,EDNRB,EMP3,ENO3,ENPP2,EPB41L3,FDPS,FHL1,FOS,FOSL1,Fxyd2,FXYD6,GCLM,GPX3,GRIN1,GSTA5,HAP1,HOXB2,HOXB9,IGFBP5,JUP,KCNC3,KCNK2,LMTK3,LOX,LTF,MAP2,Marcks,ME…	762 (20)
prostaglandin E2		chemical - endogenous mammalian		-0.223		9.29e-08	ACTA2,ADAMTS1,ADORA2B,ALOX15,ANGPT1,AQP3,ARC,AREG,ARG1,B3GALT5,BMP2,CASP14,CCN2,CCND1,CDH1,Clec2d (includes others),COL1A1,CP,Crisp1/Crisp3,Cxcl9,ENPP3,F2RL1,FMOD,FOS,FOSL1,FOSL2,FSCN1,GJA1,HAS2,ICAM1,IGFBP4,IGFBP5,IGFBP7,IL12RB1,IL1A,IL1RN,IL23R,IL2RG,IL6,JAG2,LAD1,LOX,LYSMD2,MMP3,MRC1,MYCL,NT5E,NTF4,PDE4A,PGF,PLA2G4A,PPARG,PPP1R15A,PRDM1,PTGER4,RASGEF1B,RORC,SLC5A1,SPHK1,ST6GALNAC2,TGFBR3,Tgtp1…	824 (16)
carboplatin		chemical drug		0.366		9.32e-08	A2M,A3GALT2,ASNS,CAPN6,CDCP1,CLDN4,CP,ELF3,GPX2,HAS2,LAMC2,LCN2,MRC1,NT5E,PLA1A,Pvr,SLC34A2,SOX2,TP53,VIM	444 (7)
ROCK2	-1.669	kinase		1.792		9.62e-08	ACTA2,CEBPA,CNN1,DES,DSC2,DSG1,DSG3,DSP,FABP5,ICAM1,MSN,PPARG,PRDM1,PRKG1,RORC,SCEL,SPINK5,SPRR3,TAGLN,TOB1,VCAM1	540 (16)
epigallocatechin-gallate		chemical drug		-0.976		1.14e-07	ANGPT1,AQP4,AR,AXL,CASP14,CCN2,CCND1,CDH1,CDKN2A,CEBPA,COL18A1,CTSK,DAPK2,ESR1,F3,FGF19,FOS,FOSL1,FOSL2,GJA1,GJB2,HES1,ICAM1,Ifi202b,Ifi47,IL1A,IL6,ISG15,JUP,Mcpt1,MDM2,MMP3,NFATC1,NOS1,OCLN,PGR,PTN,REL,SFRP1,SLC2A4,SLC5A1,TACSTD2,TIMP2,TNF,TNFRSF10A,TNFSF10,TP53,TRAF1,VCAM1,VIM	681 (18)
EFNA5	-0.492	kinase		1.698		1.24e-07	ABCA12,BDNF,CCN2,CRABP2,DSG1,FABP5,FOSL1,ITGB6,KRT13,KRT16,KRT18,KRT4,KRT7,NOS1,NT5E,PGR,PKP1,PTHLH,TGM1	397 (7)
TEAD2	2.021	transcription regulator	Activated	3.153	bias	1.24e-07	AK5,BBOX1,CCN2,CCND1,COL5A2,FIBIN,IGFBP5,KAZN,LIMCH1,LOXL1,NUAK1,PCDH18,PDGFRL,POSTN,SAMD5,SDC2,TAGLN,TP53,TP63	363 (7)
budesonide		chemical drug	Inhibited	-2.504		1.32e-07	ALOX12,ALOX15,AREG,B4GALT5,BTG3,C1R,CAPN5,CDS1,CRYAB,CST6,CYP2S1,CYP3A5,DOCK3,DOCK9,DSC2,DSG1,FAM214A,GNA11,GNA15,GNAI1,GRHL1,IGFBP3,IL13RA1,IL1RL2,IL1RN,IL6,INPP4B,KRT7,LIMK2,LOX,MAP2K6,MEGF9,MXD1,MYO6,NPAS2,PADI1,PCSK5,PHACTR2,PRDM1,PRKCG,PRKD1,PSCA,PTN,RASGEF1B,RGS5,S100A14,SAMD5,SCNN1B,SLC16A9,SLURP1,SRGAP1,STK39,TFPI,TIAM1,TNF,TPRG1,TSC22D3,WNK1,WNT5A,ZNF365	541 (20)
Tgf beta		group	Activated	2.896		1.32e-07	ACTA2,ADAM12,AOC3,BAMBI,BASP1,BGN,CCN2,CCND1,CDH1,CDH11,CDKN2A,CDKN2B,CHST11,COL10A1,COL12A1,COL1A1,COL1A2,COL5A1,CTSK,FBLN2,FOS,FSCN1,FSTL1,GATA3,GREM1,HTATIP2,IGFBP3,IGFBP4,IGFBP5,Ighg2b,IL1A,IL1RN,IL6,KRT16,LCAT,LOX,MMP11,MMP15,MMP3,MMP7,MN1,MXD1,NOX4,PDGFB,PMEPA1,POSTN,PPARGC1A,PROM1,PTHLH,RORA,RORC,SMAD6,TAGLN,TIMP2,TIMP3,TNF,TNFRSF11B,TNFSF10,VCAM1,VIM	838 (18)
CDK19	-0.637	kinase		-1.723	bias	1.33e-07	ACVR1B,AEN,ALDOC,BTG2,CDH1,CDKN2A,DNMT3L,DRAM1,EPCAM,EPHX1,FADS2,IL1A,JAG2,MDM2,MVD,MXD1,OSGIN1,PHLDA3,Podxl,PPP1R15A,RB1,RXRA,SAT1,SFN,SOX15,SPHK1,TBX3,TFCP2L1,TRIB3,TSC22D1,ZFP36L1,ZMAT3
PELP1	0.037	other		-0.896		1.33e-07	ACTG2,ADA,AHNAK2,ASNS,AUTS2,BMP2,CCND1,CLIC3,COL12A1,DOCK11,EPDR1,FBN2,FOS,FOXQ1,GJB2,GREB1,IL13RA2,IL1A,KCNK2,KRT15,KYNU,LGALS7/LGALS7B,MAP1B,MRAS,MRC1,PLD5,PPARG,PPARGC1A,PRSS3,RBP1,SYT7,TAGLN	788 (25)
EFNA4	2.354	kinase		1.739		1.39e-07	ABCA12,CCN2,CRABP2,DSG1,FABP5,FOSL1,ITGB6,KRT13,KRT16,KRT18,KRT4,KRT7,NT5E,PKP1,PTHLH,SPRR3,TGM1
CREBBP	0.276	transcription regulator		1.486		1.4e-07	ADAM12,ANGPT1,AR,ARHGAP24,ARHGEF10L,ATF6,CAMK2B,CCND1,CDH1,CEBPA,COL1A2,CRISPLD2,Cxcl9,DHRS3,EDARADD,EHHADH,EYA2,FDPS,FOS,FOSL2,FRMD4B,GFRA1,GRIA3,GRIN1,HAS2,HDAC11,IL12RB1,IL17RE,IL18R1,IL23R,IL6,INHA,IRF6,ISG15,ITGB7,JUP,KCNIP3,KCTD1,KRT14,LORICRIN,MDM2,MMP11,MPZ,MSX1,NPAS2,NTN1,NTRK3,PDE3B,PGR,PPARGC1A,PPFIBP2,PPM1E,PTPRF,RAPGEF3,RB1,Rnf125,RNF39,SCN4B,SH3GL3,SLC43A1,SMOC1,SMPD3,TAGLN,TANC2,TB…	814 (23)
aldosterone		chemical - endogenous mammalian		1.297	bias	1.52e-07	ADAMTS1,APLN,AQP4,ATP1B1,BDNF,BMP2,CACNA1G,CCN2,CEBPA,COL1A1,COL1A2,EMB,FKBP5,FOS,FOSL1,FXYD4,HAS2,HHIP,ICAM1,IL6,IP6K3,KCNMA1,LCN2,LOX,NDRG2,NFATC2,Nppb,PGF,PLAUR,PPARG,PPARGC1A,PSCA,PTGDS,SCNN1A,TNF,TPRG1,TSC22D3,VCAM1,WNK1,WNK4,ZBTB16	646 (17)
ITGB1	-0.185	transmembrane receptor		-1.018		1.54e-07	ACTA2,ADAMTS12,ADAMTS5,BMPR1B,CDH1,CDKN2A,COL10A1,COL1A1,COL1A2,COL27A1,COL5A2,FBN2,FOS,GAS1,GDF6,HAS3,ICAM1,IL1RN,IL6,ITGA7,ITGB7,LOX,LOXL1,MMP15,PAPPA,PLAUR,ROBO1,RORC,SIDT1,TIMP2,TNF,TNXB,TP53,VIM,WNT5A	771 (20)
NFkB (complex)		complex	Activated	3.421	bias	1.55e-07	A2M,ACKR3,ADORA2B,ALDH1A3,ANKRD1,AQP1,AQP5,BAMBI,BBC3,BCL11A,BDNF,BMP2,C1R,C3,CARD10,CBR3,CCK,CCN2,CCND1,Cd24a,CDH1,COL18A1,COL1A2,Crisp1/Crisp3,CXCL6,Cxcl9,CYP3A5,DDIT3,EDNRB,EHF,ELF3,EPAS1,EPCAM,F2RL1,F3,FABP5,FOS,GAD2,GATA3,GDF15,GRIN1,HAS2,HGFAC,HLA-A,ICAM1,IFNE,IGFBP2,IGKC,IL13RA2,IL1A,IL1RN,IL6,ISG15,ISL1,ITPKB,KRT17,KRT19,KRT6B,KYNU,LCN2,LGALS7/LGALS7B,LTC4S,MDM2,MMP3,MST1R,MYBL1,NCAM1,NOS…	722 (13)
10E,12Z-octadecadienoic acid		chemical - endogenous mammalian		-0.765		1.59e-07	ACSM3,ADAM12,APLN,B3GNT7,CACNA1G,CACNG4,CAMK2B,CAV1,CBR3,CEBPA,D430019H16Rik,DDIT3,DGAT2,DGKH,EBF1,FADS1,GCNT4,GDF15,IGFBP3,IL1RN,IL6,LGALS12,ME1,PANK1,PNPLA2,PODN,PPARG,PPP1R15A,RORC,SCD,SLC2A4,SMTNL2,SOX6,SOX7,TNF,TRIB3,VNN1,Zfp185	652 (21)
ACVR1	-0.696	kinase		0	bias	1.63e-07	3110039M20Rik,ALPL,AUTS2,C1R,CSRP2,EDIL3,Fndc1,FSTL1,HHIP,ICAM1,IL33,MSX1,NTN1,OGN,PROS1,SRPX2,TRIM44,VCAM1	224 (7)
SP1	-0.135	transcription regulator	Activated	3.14	bias	1.7e-07	Abcb1b,ACSS1,ACTA2,ADA,ADAMTS1,ALOX12,ALPL,ANK1,AR,ASNS,B4GALT5,BACE2,BBC3,BDNF,CAV1,CCN2,CCND1,CDH1,CDKN2A,CDKN2B,CEACAM1,CEBPA,COL1A1,COL1A2,CRABP2,CRYAB,CYBRD1,CYP1B1,CYP7B1,DNM1,ESR1,F3,FBXL2,FES,FOS,FOSL1,FOXF2,GDF15,GJA1,GRIN1,HAS2,ICAM1,IGFBP3,IGFBP4,IL1A,KRT16,KRT18,KRT19,KRT4,LCAT,LORICRIN,LTB4R,Marcks,MMP11,MRC1,MST1R,MYBL1,NGFR,NOS1,NOX4,Nppb,NPTXR,NTF4,PADI1,PADI4,PDGFB,PGR,PLA2G4A,PL…	840 (22)
TEAD3	2.554	transcription regulator	Activated	2.578	bias	1.78e-07	ACTA2,AK5,BBOX1,CCN2,COL5A2,DES,FIBIN,IGFBP5,KAZN,LIMCH1,LOXL1,NUAK1,PCDH18,PDGFRL,POSTN,SAMD5,SDC2,TAGLN,TP63
INHA	6.05	growth factor		-0.718		1.91e-07	ACTA2,ACTG2,ADAMTS1,ADAMTSL2,AREG,CCN2,CNN1,COL1A2,COL4A5,COL4A6,CYP1B1,DNAH7,EPHX1,HAS2,IGFBP4,INHA,KITLG,KRT18,KRT19,KRT79,KRT8,LRP11,MYL9,Obsl1,PCDH7,PIK3R1,SMARCA1,TP53INP1,Tpm2	379 (7)
ADAMTS18		peptidase	Activated	3.217	bias	2.1e-07	CCN2,CDH3,CLDN4,CLDN8,Col17a1,COL4A6,FGFR2,GATA3,ITGB7,KRT14,LAMB3,LAMC2,MMP15,SDK2
NFKB2	-1.965	transcription regulator		1.677		2.12e-07	AR,BACE2,BMP2,C1QTNF3,CCDC141,CCND1,CD34,CRCT1,DPT,ENPP2,FOS,FOXG1,GAL3ST1,GDF6,Gstt1,IGFBP4,IGFBP5,IL34,KAZALD1,KRT7,LTC4S,MARCKSL1,Mcpt8,PLD5,Ppbp,PRR9,RAB3B,SEMA3E,Serpina3g (includes others),TNF,TRAF1,UGT1A6,UPK1B,VCAM1,WNT10A,ZFP36L1	623 (12)
CREB1	-0.139	transcription regulator		-0.405		2.15e-07	AK4,ANGPTL2,ARC,ARG1,ATF5,ATP2B4,BDNF,BPIFC,BTG2,Cabp1,CACNA2D1,CAPN5,CCK,CCND1,CDH11,CDK14,CEBPA,CH25H,CNN1,COL24A1,CPD,Crisp1/Crisp3,CSRP2,DKK2,EDIL3,FAM3B,FGF19,FGFR2,FOS,FRAT1,GAD2,GALNT1,GDA,GFRA1,GPR63,GRIA3,HAS2,HLA-A,HPGD,IDI1,Ifi202b,IGSF10,IL6,INHA,KYAT1,LAYN,LCN2,LORICRIN,MARCKSL1,MDGA1,Meis1,MEST,MFSD2A,MRC1,MVD,MYO1B,NDUFA4,NECTIN3,NEURL1B,NEXMIF,NOS1,NREP,NRP2,PDE3B,PLA2G4A,PLXNC1,P…	794 (21)
F2RL1	6.042	G-protein coupled receptor		1.937	bias	2.28e-07	ACTA2,ANGPTL2,AREG,BDNF,CAV1,CCN2,F2RL1,F3,FOS,FOXA1,IL1A,IL31RA,IL6,ITGA7,KITLG,LOXL4,NPY1R,NT5E,PAPPA,RAB27A,Serpina3g (includes others),SERPINB1,SERPINB2,SPRR1A,STK32A,TNF,TRPA1,VGF	623 (16)
CDKN2A	8.649	transcription regulator		-1.743		2.36e-07	A2M,ACTA2,AK1,AMD1,BBC3,BCL11A,BCL11B,BTG2,BTG3,C3,CCL24,CCN2,CCND1,CDKN2A,CDKN2B,COL1A1,CPA4,Cxcl11,CXCL14,CXCL6,Cxcl9,DES,E2F2,E2F6,EBF1,EHD3,FGF11,FLT3,FOS,FOXA1,GATA3,HDGFL3,Hmga2,HOXB9,IGFBP5,IL1A,IL2RG,IL6,KCNK1,KITLG,MDM2,MMP3,MRC1,NOX4,ODC1,P4HA2,PAX5,PBX3,PGF,PMEPA1,POLK,RAB27A,RB1,RORA,SOX2,TGFBR3,TNF,TOB1,TP53,TP53INP1,TP63,VIM,ZBTB16,ZMAT3	662 (17)
propylthiouracil		chemical drug		-1.391		2.43e-07	ADSS1,AKR1C3,ALDH1A3,Aldh1a7,AQP4,ART3,BCL11A,BCL11B,BDNF,BTG2,C1QTNF3,CDH1,CHKA,CNTN2,CRLF1,EMB,EMP3,EPHA3,FADS1,FADS2,GPC2,Ifitm1,KIF5C,KRT14,LGALS1,MAP2,MAP6,MMP11,MRC1,Orm1 (includes others),PCOLCE2,PHF21B,PKP2,PRDM16,PROM1,RBP1,RHBG,ROBO1,RUNDC3A,SERPINB1,Serpinb1b,SFRP2,SLC29A4,Stfa1 (includes others),TRIB3,TTYH1,VLDLR
PRDM1	3.381	transcription regulator		-1.848		2.51e-07	ACOX2,ADA,AFF3,ALPL,AQP3,ATP9A,BCL11A,BHLHA15,CASZ1,CD1D,CLDN1,CPA4,CRISPLD2,CXCL6,ESR1,EVA1A,FAM167A,FOS,FOSL1,FZD2,GPR84,Gsta4,GSTA5,HAL,HHEX,HLA-A,ICAM1,Ifi202b,IFIT1,IFNLR1,IL1A,IL6,ISL1,JCHAIN,LGALS1,LGALS7/LGALS7B,LIMK2,MALL,ME1,MYO18B,NFATC1,OAS2,PAX5,PCDH18,PLA2G4A,PLAC8,PRDM1,PRKCG,RAPGEF3,SCARA5,SERPINB4,SLC25A37,ST14,TIGIT,TNF,TNFSF10,TNFSF13B	826 (24)
STAT5B	-0.3	transcription regulator		-0.614		2.55e-07	A2M,ACOT4,AKR1C3,ANKRD1,ANKS1B,AR,CBR1,CCDC141,CCND1,CDH1,Cdkn1c,CISH,COX6A2,CYP39A1,CYP3A5,DDIT3,DGAT2,DIP2B,EBF1,ESR1,ESR2,FAM89A,FBLN1,FOS,FOSL2,GPX7,Gsta4,IL6,KRT19,KSR1,LMAN1L,MB,MDM2,ME1,MYL7,NOX4,NQO1,NRP2,NT5E,NUDT7,PAX5,PCSK5,PDZRN3,PROM1,PVT1,SCARA5,SCD,SLC34A2,SOX15,TMEM45B,TMEM98,TNF,TRAF1,TRAF3,VNN1,Wfdc18	862 (21)
RELA	-0.177	transcription regulator		1.985	bias	2.58e-07	A2M,Abcb1b,ACTA2,ADAMTS5,ALCAM,ANKRD1,AR,BBC3,BMP2,BTG2,C3,CAV1,CCN2,CCND1,CDH1,CDKN2A,COL1A1,COL1A2,CRYAB,CXCL6,DDIT3,DNMT3B,EHF,ELF3,EPAS1,EPCAM,F3,FOS,FSCN1,GDF15,HAS2,HES1,ICAM1,IGFBP2,IGKC,IKZF2,IL1A,IL1RN,IL6,INPP4B,ISG15,KRT15,KRT18,KRT8,LTC4S,LUM,MDM2,MMP3,MMP7,MST1R,Mx1,NFATC1,NFATC2,OAS2,PDGFB,Pmaip1,PPARG,PRDM1,PTGDS,PTGER4,RORC,Saa3,Serpina3g (includes others),SIX4,SLC2A4,SMOC2,SYTL1,…	658 (12)
NR3C1	-1.634	ligand-dependent nuclear receptor	Inhibited	-2.437		3.04e-07	A2M,ACTA2,AMIGO2,AQP1,AQP5,ATP1B1,BCL2L14,BDNF,BIN1,BMP2,C1R,CAPN2,CARD10,CAV1,CAVIN2,CBR1,CCN2,CCND1,CEBPA,COL1A1,COL1A2,COL5A1,CRABP2,CRYAB,Cxcl11,CXCL6,Cxcl9,CYP3A5,DAPK2,DGAT2,EDN2,EPB41L4B,F2RL1,F3,FKBP5,Flg,FOS,GAS1,GATA3,GCLM,GLIPR1,GPX3,GRIA3,GRIN1,ICAM1,IDH1,IL1A,IL33,IL6,IP6K3,ISG15,ITGB6,Ivl,KRT14,KRT15,KRT17,KRT5,LAD1,LCN2,LGALS12,LORICRIN,LOX,MAL,MDM2,MEST,MFSD2A,Mx1,NFATC1,NGFR,NLRP…	862 (14)
HOXC8		transcription regulator		-0.775		3.09e-07	ANKRD1,CDH11,CNN1,EMB,FZD2,GAS1,GREM2,HES2,KRT19,MSLN,NQO1,PMP22,SERPINF1,SLC16A3,TAGLN
Mek		group		0.956		3.26e-07	ADCY3,AXL,B4GALT5,CCN2,CCND1,CDCP1,CDH1,CDKN2A,CELSR2,COL1A2,CPD,CRYAB,DDR2,DNMT3B,DSE,EPAS1,EPCAM,EPHB2,ERBB3,ESR1,F3,FGFBP1,FOS,FOSL1,FUT10,GALNT18,GDA,GDF15,GXYLT2,HAS2,HRH1,ICAM1,Ifi47,IL6,ITGB6,L1CAM,LAMB3,LAMC2,MDM2,MSLN,MST1R,NOX4,NQO1,NT5E,NUP210,PPARGC1A,PTPRF,Pvr,RND3,SEMA4C,SEMA6A,SLC43A3,SLC6A14,SORL1,ST6GALNAC2,TACSTD2,TFAP2C,TNF,TP53,Tpm2,TSPAN1,TTYH3,UGT8,VIM	643 (17)
E. coli serotype 0127B8 lipopolysaccharide		chemical - endogenous non-mammalian	Activated	2.466		3.36e-07	ACSS1,ADGRG2,AIF1L,AQP1,BDNF,CAV1,CCN2,CELSR2,CHST11,Cxcl9,DDIT3,DOK1,EDNRB,F2RL1,FAM107A,FZD1,FZD2,GJA1,GJB2,GNB4,GPR146,HAS2,Ifi47,IL6,LAMC2,LCN2,LIFR,LOX,MMP3,NOTCH3,P2RY1,PCK2,PDGFB,SEMA4A,SLC16A9,TGFBR3,TNF,TNFRSF11B,TNFSF13B,UBD,VIPR1	694 (13)
PNPLA1	1.249	enzyme		-0.67		3.43e-07	ABCA12,CERS3,CYP4F22,ELOVL4,FABP5,Flg,GBA,Ivl,KRT6B,LORICRIN
P38 MAPK		group	Activated	2.601	bias	4.17e-07	ANGPT1,ANK1,AQP4,AQP5,BBC3,BDNF,BGN,BMP2,CAV1,CCK,CCN2,CCND1,CD1D,CDKN2A,CEBPA,CTSK,CXCL6,DDIT3,DES,DUOX2,EDNRB,F3,FBXO32,FOS,GJA1,HAS2,HTRA1,ICAM1,IGFBP5,IL1A,IL1RN,IL6,IRF6,IRX1,MAL,MMP3,NFATC1,NFATC2,NGFR,NOTCH3,NR1H4,OCLN,PDX1,PLA2G4A,PLAUR,POSTN,PPARG,PPARGC1A,PRDM1,RB1,RBP1,RND3,SATB2,SCNN1A,SDC2,SERPINB2,SERPINB5,SLC8A1,Tgtp1/Tgtp2,TIMP2,TIMP3,TNF,TNFSF10,TP53,VCAM1,VLDLR,WNT5A,ZMAT3	794 (17)
ERK		group		1.956		4.32e-07	ACTA2,ADGRG6,AREG,AXL,BGN,BTG2,BTG3,CAV1,CCK,CCN2,CCND1,CD1D,CDH1,CLDN4,COL1A1,CTSK,CXCL6,DNMT3B,DPYSL2,EPAS1,ESR1,FOS,FOSL1,FOSL2,GDF15,GOT1,GPRC5C,HAS3,ICAM1,IL23R,IL6,KRT18,KYNU,LCN2,MAL,MMP3,NOTCH3,ODC1,POSTN,PRDM1,RECK,RORC,SERPINB2,SFN,SORT1,SOX4,TNF,TP53,VCAN,ZFP36L1	729 (14)
BMP6	2.178	growth factor		1.318		4.43e-07	ACTA2,ADAMTS1,ADAMTS5,ADGRL2,AQP5,CAVIN2,CCN2,CYP1B1,CYP39A1,E2F2,EPHX1,FOSL1,FRMD4B,GNB4,Hmga2,IL1A,IL6,INHA,Meis1,MSX1,PCOLCE2,PMEPA1,PMP22,PRKD1,SCEL,SMARCA1,TAGLN,Tgtp1/Tgtp2	629 (18)
Alpha catenin		group	Inhibited	-3.3	bias	4.45e-07	ADAMTS1,ADAMTS12,ADAMTS5,AREG,BGN,C1QTNF3,CDH11,COL1A1,COL1A2,COL5A1,COL5A2,CXCL6,EPGN,EPHA3,FSTL1,IGFBP2,IGFBP4,IGFBP6,IGFBP7,IL2RG,IL6,KRT6B,LUM,MMP11,Saa3,STEAP2,THBS2,TNC,TNF,VCAM1,VIM	723 (19)
NEUROG1		transcription regulator		-1.528		4.53e-07	AMIGO2,C1S,C3,CAVIN2,DSP,EPAS1,GASK1B,GREM1,HAS2,IL6,LRIG1,MEST,MFAP4,P4HA2,PAPPA,S100A4,SERPINF1,SLC43A3,TACR1,TMTC2,TSPAN7
HDAC2	0.359	transcription regulator		-1.785		4.7e-07	ACTA2,BBC3,CAVIN2,CCND1,CD34,CDH1,CDKN2A,COL11A1,COL1A1,COL1A2,DPT,EPGN,ESR1,F3,FAM107A,IL1A,IL6,KRT15,LGR6,MDM2,MMP7,MPZ,NFATC1,PDGFB,RORC,SFRP1,SLC8A1,SOX11,Sprr2h,TAGLN,Tcam1,TDRKH,TNF,TNFRSF19,TNFSF10,TP53,TP63	784 (25)
enalapril		biologic drug		-0.987		4.75e-07	A2M,ACE2,ACTA2,ADAMTS1,ASNS,CAPN6,CCN2,CCN5,CDKN2A,CLDN4,COL1A1,CP,FBLN2,FBN1,GPX2,GPX3,LCN2,LOX,PDX1,PTH1R,PTHLH,S100A4,SLC34A2,TIMP2,VCAM1	825 (19)
medroxyprogesterone acetate		chemical drug	Activated	2.218		4.78e-07	ADAMTS1,ADCY3,ALDH2,ARSA,ARSB,AVPR1A,BBC3,BDNF,BTG2,CAPN2,CAV1,CCND1,CDKN2B,CEBPA,CLDN1,COL11A1,COL4A6,COL5A1,COL5A2,CTSK,DNMT3B,ENAH,ENPP2,ERBB3,ESR1,F3,FAM107A,FLNC,FMOD,FOSL1,FZD2,FZD8,GPX3,HTRA1,ICAM1,IGFBP7,IL1A,IL6,IQGAP2,ITGA11,ITGA7,KRT18,LAMB3,LEPR,LIFR,MDM2,MMP7,MPZL2,ODC1,P4HA2,P4HA3,PCK2,PDE3B,PDGFB,PGR,PIK3R1,PIP4K2A,PLCB1,PPARG,PPP2R1B,PRICKLE2,RARRES2,RHOV,ROBO1,SAT1,SCD,SESN3,SFRP…	938 (20)
PPP1R13L	1.16	transcription regulator		1.58		5.26e-07	BBC3,CLDN1,DSC3,DSP,GJA1,Ivl,JUP,LORICRIN,PERP,PKP1,TP63	263 (7)
HNF1B	1.409	transcription regulator		0.363		5.4e-07	B3GALT5,BGN,CCDC80,CDH1,CLDN1,CLDN7,COL5A1,COL5A2,FOXA3,FZD1,FZD2,HGFAC,IGFBP3,ITGB6,LUM,MMP7,MPZL2,NR1H4,OCLN,PCSK9,PDX1,PDZK1IP1,PLAUR,PMP22,S100A3,S100A4,SGK2,SLC29A1,SLC5A1,SOAT2,TACSTD2	333 (7)
mir-25		microRNA		-0.483	bias	5.87e-07	BBC3,E2F2,EDNRB,ESR2,IL6,KITLG,MDM2,MYLIP,NOX4,RGS5,TBX3,TNF,TOB1,TP53,TP63,TRAF3	636 (15)
HSPA9	-1.564	other		1.872		5.87e-07	CDH1,Cdkn1c,CLMN,CRABP2,HES1,HOXD10,KRT14,KRT18,KRT8,MDM2,MMP3,NAV2,PRDM16,TIMP2,TP53,VIM	736 (22)
SBDS	-1.026	other				6.03e-07	AKR1C3,CCN2,CHAC1,COL14A1,COL27A1,DDIT3,DERL3,DPYD,EPDR1,ERBB3,FA2H,FBXL16,FBXO32,FOS,HOXA13,IGFBP7,KIF1A,MYEF2,P2RX5,PAK3,PCDH7,PPP1R15A,PPP2R2C,TNC,TRIB3	244 (5)
SFN	5.068	other		1.863		6.2e-07	BTG2,CDH1,DSC2,DSG2,DSP,F3,FKBP5,JUP,KRT18,KRT8,NET1,PKP3,VIM	857 (15)
prostaglandin D2		chemical - endogenous mammalian		1.776		6.49e-07	ALOX15,CCND1,EDARADD,ENPP3,EPAS1,ESR2,HAS2,HAS3,HSPA1A/HSPA1B,IL1A,IL6,NFATC1,PLAUR,PPARG,PRDM1,PTGDS,RBPJ,RXRA,TNF,TNFRSF11B	746 (24)
FKBP10	-1.611	enzyme	Inhibited	-2.236	bias	6.49e-07	APLN,BGN,COL12A1,COL18A1,COL1A1,COL1A2,COL5A1,COL5A2,COL8A2,CRISPLD2,CRLF1,CSGALNACT1,EPHB2,MMP3,NOX4,PDPN,PLOD2,POSTN,Saa3,SPHK1
SNCA	-0.248	enzyme	Activated	2.157		6.51e-07	ARG1,ARHGEF4,BBC3,BCL11B,BDNF,CA12,CACNA2D4,CCBE1,CCDC80,CCK,CDHR1,CHAC1,CHL1,CTHRC1,DDIT3,DHRS3,DNM1,DOC2B,FAM107A,FAM81A,FBXO32,GDA,GPR137B,GRAMD1B,HES1,ICAM5,Ifi47,IL13RA1,IL6,ISG15,JPH2,KCNF1,KCNG1,KIF1A,LHFPL2,LRRK2,MAP1B,MARK1,MDM2,MEGF11,MMP3,MYO5B,NPTXR,NQO1,NRP2,NTN1,PDZRN3,PLAC8,PLAUR,PLXNC1,PRKCG,RCN3,RGMA,SCN7A,SERPINB1,SFN,SLC27A1,SMOC1,SP8,SRPX2,TACR1,TMEM117,TNF,TNFRSF19,TP53,TRIB3…	668 (16)
HDAC1	0.53	transcription regulator		-0.488		6.66e-07	ALCAM,AMPD3,AR,ARC,BAMBI,BBC3,BDNF,CAVIN2,CCND1,CD1D,CD34,CDH1,CDKN2A,CEACAM1,CEBPA,COL1A1,COL1A2,CTSK,DAB2IP,E2F2,EPGN,ESR1,FAM107A,FGFBP1,FOS,HES1,IL1A,IL6,KRT15,LCN2,LGR6,MDM2,Meis1,MPZ,NFATC1,PDGFB,PPARG,PPARGC1A,RECK,RORC,SERPINB2,SFRP1,SLC8A1,SOX11,SOX2,Sprr2h,TAGLN,Tcam1,TDRKH,TNF,TNFRSF19,TP53,TP73,TSC22D3,TUBB3	816 (20)
ACSL4	-0.332	enzyme		-0.809		6.77e-07	AR,AUTS2,CDKN2B,COL12A1,DOCK5,FERMT1,GDPD1,ICAM1,KRT18,NT5E,PGR,PPARG,PRKG1,RHOU,SAT1,SERPINF1,STK39,TFPI,THBD	598 (13)
SOX4	5.298	transcription regulator		1.759		6.82e-07	1700048O20Rik,2610035D17Rik,ADAMTS5,AIF1L,Akr1c12/Akr1c13,APBB1,B3GNT8,BBC3,CAPN2,CD1D,CGAS,CHAC1,Crisp1/Crisp3,EIF4E3,EMB,FHL1,FOS,Ifitm1,IGFBP4,IGKC,KYNU,LY6D,MAP7,MARCKSL1,MEX3A,MMP11,NCAM1,NREP,NUAK1,PARD6G,SEL1L3,SEMA3B,SEMA3E,SLC5A9,SNN,SORT1,STAG3,TDRKH,TIAM1,TMEM98,Tmsb4x (includes others),TNFRSF19,TPH1,VIM
bleomycin		biologic drug	Activated	3.188	bias	6.82e-07	ACKR3,ACTA2,ANGPT1,ARG1,C3,C5,CAMK2B,CCN2,CDH11,CEBPA,CHAC1,COL1A1,COL1A2,CTSE,CTSK,FOSL1,FZD1,ICAM1,IL13RA1,IL13RA2,IL1A,IL6,KITLG,LOX,LRRK2,MAP3K6,MRC1,MSN,NFATC2,PLA1A,PPARGC1A,S100A4,Saa3,SFRP1,SFRP2,SPHK1,THBS4,TIMP2,TIMP3,TNF,TNFRSF10A,TP53,TP63,WNT5A	862 (17)
FSH		complex		1.067		7.78e-07	ACTA2,ACTG2,ADAMTS1,ADAMTS16,ALPL,APLN,AQP3,AR,AREG,ARL4C,ATP9A,AXL,BCL11A,BDNF,BMPR1B,BTG2,CAP2,CARD10,CCN2,CCND1,CDK14,CH25H,COL18A1,DHRS3,DUSP9,DYRK3,ESR1,ESR2,FKBP5,FLNC,FOS,FOSL1,FOSL2,FOXG1,GDE1,GOT1,IGFBP3,IGFBP4,IL1RN,IL6,INHA,KITLG,KRT18,LGALS1,LOX,LYPD3,MICOS10-NBL1/NBL1,MN1,NPY1R,P4HA2,PGR,PLA1A,PLCL1,PPARA,PPP2R5B,PRKD1,PTPRF,PTPRN,RAB27A,RGS5,SLC2A4,SMAD6,SNAP25,SSTR2,TFPI2,TGFBR3,TI…	735 (20)
MIR17HG	-0.106	other		-1.732	bias	7.88e-07	ACTA2,ALPL,APCDD1,CCND1,CELSR1,COL5A1,DAB2IP,ECE1,FBN2,FRAS1,FZD1,FZD2,HOPX,LRP4,MDFI,PITX1,PTK7,PTPRU,RECK,RGMA,RGS5,SEMA3E,SMAD6,SMOC1,SORT1,SOX11,SOX4,TAGLN,TBX20,TBX3,WNT5A
17-alpha-ethinylestradiol		chemical drug	Activated	2.261		8.29e-07	Abcb1b,AQP3,ASNS,BCAT1,C3,CDH1,CXCL6,CYP7B1,DSC2,ESR2,F3,FBLN2,FOS,FXYD4,GDF15,Gsta4,ISYNA1,KRT14,KRT19,KRT4,KRT7,LCN2,LIFR,MDM2,MRC1,NR1H4,ODC1,PERP,PGR,PTGDS,SERPINB5,SFN,SLC34A2,TNF,VCAM1,WNT4	904 (20)
aspirin		chemical drug	Inhibited	-3.168		8.69e-07	Abcb1b,APLN,AR,BDNF,BMP6,CAV1,CCND1,CDKN2B,DDIT3,EDNRB,F2RL1,FBLN5,FBN1,GDF15,HPGD,ICAM1,IGFBP2,IGFBP3,IL1A,IL6,ITPKB,KITLG,LIFR,MMP11,NGFR,NOX4,OCLN,PLA2G4A,PMP22,POSTN,PPARA,RECK,SERPINB5,SOX4,SOX7,TNF,TNFSF10,TP53,VCAM1	915 (23)
HIF1A	1.428	transcription regulator	Activated	3.316		9.85e-07	ACTA2,ADAMTS1,ADORA2B,ALDOC,APLN,AQP4,ASNS,AXL,BGN,BMP2,CAV1,CAVIN2,CCN2,CCND1,CDCP1,CDH1,Cdkn1c,CDKN2A,CHKA,CLDN1,Cxcl9,CYP2S1,ECE1,EDNRB,EGLN3,ENO1,EPAS1,FAM162A,FHL1,FOS,FSCN1,FZD2,GCHFR,GJA1,GRIN1,HOXA13,ICAM1,IGFBP2,IGFBP3,IGFBP5,IL1A,IL23R,IL6,JUP,KITLG,KRT14,KRT18,KRT19,L1CAM,LGALS1,LIFR,LOX,LOXL1,MB,MMP7,MST1R,NDUFA4,NOX4,NT5E,P4HA2,PDGFB,PGF,PLAC8,PLAUR,PLOD2,PPARA,PPARG,PROM1,REL,RORC,S…	661 (12)
D-glucose		chemical - endogenous mammalian		1.53		1.02e-06	Abcb1b,ACE2,ACSS1,ACTA2,ACTG2,ADA,ALDOC,APLN,AQP1,ARG1,ART3,ASNS,ATF5,ATF6,ATP2B4,ATP8B1,BBC3,BCAT1,BMP2,C3,C8orf44-SGK3/SGK3,CAV1,CBR3,CCN2,CCND1,CEBPA,CNN1,COL1A1,COL1A2,COX6A2,CPD,DDIT3,DES,DIRAS2,DTNA,ELF3,ENO1,ENPP2,ERFE,EVA1A,FABP5,FAM3B,FBXO32,FOS,G6PC3,GAS1,GCNT4,GDF15,GJA1,GOT1,GPLD1,GREM1,GSDME,ICAM1,IDH1,IL6,KCNF1,KCNN4,KCNQ1OT1,KIF5C,LGALS1,MAP2K6,MMP17,MYL9,NOX4,NPNT,Nppb,NPY1R,NQO1,…	781 (17)
AGN194204		chemical drug	Activated	2.854		1.05e-06	ACAT2,ARL4C,CCN5,Cd24a,CD5,CEBPA,CHKA,COTL1,CRABP2,Crip2,CYP7B1,DKK2,EMP3,ENO3,F2RL1,FDPS,Fmnl1,FOXA3,GATA3,GJA1,GNAI1,IDI1,Ifi47,IL12RB1,IL33,IRAG2,ITGB7,LGALS1,LIFR,NSDHL,PARM1,PDCD4,PLAC8,PPARG,PPARGC1A,PROS1,PTPN22,RAMP3,SCD,SCIN,SYT13,Tgtp1/Tgtp2,TIGIT,TMPRSS11F,UNC13C,WNK4	642 (13)
raloxifene		chemical drug		-1.383		1.11e-06	AREG,BMP2,CCN5,CCND1,CXCL6,CYP1B1,ENPP2,EPHA1,ERBB3,ESR1,ESR2,GREB1,HES1,HSPA1A/HSPA1B,IGFBP4,IL6,INPP5J,IRF6,KRT7,KYNU,L1CAM,LUM,MB,MFAP5,MMD,MMP3,MPPED2,MYBL1,MYO1B,PAX5,PGR,SELENBP1,THBD,TIMP3,TM4SF1,TNF,TNFRSF11B,TTC9	812 (19)
IL6	2.366	cytokine	Activated	2.824		1.17e-06	A2M,ACTA2,ADAMTS1,ADAMTS5,ADGRB1,ADGRL2,ADORA2B,ANGPT1,AQP4,AREG,ARG1,ARL4C,BAMBI,BBC3,BDNF,BGN,BMP2,BMP6,BTG2,C3,CCK,CCL24,CCN2,CCND1,CDH1,CDKN2A,CDKN2B,CEACAM1,CEBPA,CIB2,CISH,COL1A1,CP,CRLF1,CRYAB,CTSK,CXCL6,Cxcl9,CYP1B1,CYP3A5,E2F2,EGLN3,ENPP2,ESR2,F3,FOS,FOSL1,FSCN1,GREM1,GRIN1,Gsta4,HLA-A,HPGD,ICAM1,Ifi202b,IFIT1,IGFBP3,IGFBP4,IGFBP5,IGFBP6,Ighg2b,IL1RN,IL23R,IL2RG,IL6,JCHAIN,KRT14,KRT18,KR…	772 (15)
NOTCH2	0.506	transcription regulator	Activated	2.222		1.31e-06	ACTA2,CDH1,CNN1,COL1A1,DES,EPAS1,EPCAM,HES1,IL1RL2,IL6,Ivl,RGS5,SDC2,TAGLN,TNF,TP53,TSPAN33	635 (17)
cigarette smoke		chemical toxicant	Activated	2.427		1.42e-06	Abcb1b,ACTA2,ALDH3A1,AOX1,AREG,ATF6,C3,CCN2,CCND1,CDKN2A,CYP1B1,CYP3A5,DDIT3,EPAS1,FABP5,FBXO32,Flg,FOS,FOSL1,GATA3,GCLM,GPX2,GPX3,GSTA5,GSTM5,Gstt1,HAS3,ICAM1,IL1A,IL6,KITLG,MAP2K6,MMP3,Muc1,NOX4,NQO1,OAS2,PDGFB,PGF,PPARA,PPARG,PRKCG,PRKCZ,RAPGEF3,REL,SLC1A4,Tmsb4x (includes others),TNF,TP53,UGT1A3,UGT1A6,WNT5A	778 (19)
arsenite		chemical toxicant		-1.757		1.48e-06	ADAM12,ADAMTS16,ALDH3A1,ASPN,CAV1,CCND1,CDH1,CDK14,CELF2,CYP1B1,DDIT3,DNMT3L,FOS,FZD1,GCLM,GSTM5,HAS2,HS6ST2,HSPA1A/HSPA1B,MDM2,NAPB,NQO1,PLCB1,PRKD1,PRKG1,SEMA5A,SGCD,TACR1,TP53	730 (19)
IL2		cytokine	Activated	2.542		1.51e-06	ACVR1B,ADCY3,ARC,AREG,ARHGAP32,ASNS,ATF5,AUTS2,BBC3,BCAT1,BMP2,C3,Calcb,CAPN5,CARD10,CCND1,CD5,CDH1,CEACAM1,CEBPA,CGAS,CHN2,CISH,CPD,Cxcl9,DAPK2,DOCK9,DSG2,ELMO3,ENO1,ENPP2,EPAS1,FADS2,FGFR2,FOS,GATA3,GDF15,Gm3383 (includes others),GPLD1,HHEX,HOPX,HSPA1A/HSPA1B,ICAM1,IDH1,IDI1,IGFBP4,IKZF2,IL12RB1,IL17RB,IL18R1,IL1A,IL1RN,IL23R,IL2RG,IL6,IRAG2,ISG15,ITGAE,ITGB7,KCNG1,KCNK1,L1CAM,LGALS12,LIFR,LSR,…	772 (18)
benzo(a)pyrene		chemical toxicant		-1.445		1.54e-06	ADAM12,ADAMTS16,ALDH3A1,ASPN,BBC3,BTG3,CDK14,CELF2,CYP1B1,DNMT3L,ELF3,EPHX1,FOS,FZD1,GCLM,GNA11,GNAI1,Gsta4,GSTA5,HAS2,HS6ST2,HSPA1A/HSPA1B,IGFBP6,LIMK2,MAP2K6,MDM2,ME1,Mx1,NAPB,NQO1,PLCB1,PRKCG,PRKD1,PRKG1,RGS5,Saa3,SELENBP1,SEMA5A,SGCD,SLC1A4,Sprr1b,TACR1,TP53,UGT1A6,ZMAT3	742 (18)
cyclosporin A		biologic drug		-1.656		1.54e-06	A2M,A3GALT2,ACTA2,ADORA2B,ASNS,AVPR1A,BCAT1,BDNF,BGN,BMP2,CAPN6,CAV1,CCN2,CCND1,CD1D,CDH1,CDH11,CLDN4,COL1A1,CP,CYP3A5,EDIL3,EDNRB,ELF3,EMP3,F3,FKBP5,Flg,FOS,GJA1,GPX2,ICAM1,IL1A,IL31RA,IL6,IQGAP2,ITGAE,ITGB6,ITGB7,KRT16,LAMC2,LCN2,LORICRIN,LYPD3,MICB,MMP3,MRC1,NFATC1,NGFR,NOS1,Nppb,ODC1,PDCD4,PDE3B,PERP,POSTN,PRKCH,PTHLH,REL,RORC,RPS6KA2,RXRA,SCD,SLC34A2,SLC8A1,SOX12,SPHK1,SYT7,TAGLN,TNF,TNFSF10…	803 (19)
BTNL2		transmembrane receptor		0.853		1.55e-06	CD109,CERK,CYP2S1,DAPL1,EMB,ENAH,EPCAM,GJB2,IKZF2,IL6,ITGAE,KCNK6,MXD1,NT5E,NTRK3,PDE7A,Phxr4,S100A4,SLC15A2,ST14,TNF,TNFSF10	633 (17)
Ctbp		group		0.174		1.56e-06	ACKR3,CDH1,CDKN2A,CTSK,DSG2,GATA3,JUP,PERP,PLAUR,RAB29	565 (12)
CDX2		transcription regulator		0.797		1.58e-06	ALDH3A1,B3GALT5,BBOX1,CAV1,CCK,CDH1,CLDN1,CTSE,DHRS9,FOXQ1,FXYD3,HEPH,Hmga2,HOXA11,HOXA13,HOXB2,HOXB9,HOXD11,HOXD13,HOXD8,KCNJ15,KRT23,LAMC2,MTUS1,Muc1,NR1H4,PARD6B,PRDM1,SCIN,SLC5A1,SOAT2,SOX2,SOX5,WNT3A
Vegf		group	Activated	2.209	bias	1.59e-06	A2M,ACKR3,ACOT2,ACTA2,ADAMTS1,ADGRL2,ANGPTL2,APLN,AQP4,ARHGAP22,ARHGEF17,ASNS,BMP2,BNC1,CDH1,CDKN2A,CELSR1,CLDN1,CNN1,CRLF1,CRYAB,CSGALNACT1,DDIT3,EHF,EHHADH,ENPP2,EPHX4,ERBB3,F3,FAIM2,FKBP5,FOSL1,FXYD4,GASK1B,GJB2,HES1,HID1,HOPX,Hoxa11os,ICAM1,IGFBP3,IGFBP4,IL1A,IL6,ITGA10,KITLG,LCN2,LPAR1,LRIG1,MALL,MGP,NFATC1,PADI1,PC,PGF,PLAUR,PLOD2,PMP22,PPARGC1A,PRDM16,PTHLH,PTPRR,RAMP3,RECK,RGS20,SERPINB2,…	655 (16)
LDB1	0.699	transcription regulator		-0.766		1.69e-06	ACOX2,ACVR1B,ANGPT1,ARID3A,BBC3,BCL11A,BCL9,C8orf44-SGK3/SGK3,CD34,CDKN2A,CGAS,CLDN4,COL18A1,DAB2IP,DACT3,DLX1,EGLN3,ESR2,FBLN1,FES,GALNT1,GJA1,GSDME,HHEX,Ifitm1,IL34,ITGAE,ITGB7,JARID2,LGALS1,LHFPL2,NLRP10,NOTCH3,NT5E,PCBP3,PDZD2,PLA2G4A,RAPGEF5,RPS6KA2,RXRA,SERPINF1,SFRP1,SFRP2,SLC43A1,SLC5A9,SLIT1,SOBP,Tcf7,TMEM38B,TNFRSF10A,TNS2,TRAF1,ZMAT3,ZNF518B
ADRB		group	Inhibited	-2.167		1.7e-06	ACAT2,ACSS1,ANKRD1,ARG1,ATF5,AXL,BDNF,CAVIN2,CCND1,CDKN2A,CRYAB,DDIT3,FAM110C,FAM214A,FDPS,FOS,GCLM,GDF15,GSTA5,HSD3B7,ICAM1,IDH1,MVD,NQO1,NSDHL,PDGFB,PPARGC1A,SLC8A1,SMAD6,Stfa3,TRAF1,TRAF3,TRIM54	653 (18)
JUNB	0.986	transcription regulator		1.554	bias	1.71e-06	ACAT2,BDNF,C3,C5,CAV1,CCND1,CDKN2A,COL1A1,COL1A2,Cxcl9,CYP1B1,EPAS1,FBLN2,FBLN5,FOSL1,HES1,HPGD,IKZF2,IL6,LAMB3,LCN2,LPAR1,MMP3,MVD,PAK3,PLAUR,PNPLA2,Raet1d/Raet1e,SCD,SERPINB2,SLC8A1,TBX3,TIMP3,TNF,UGT1A3	855 (20)
DKK1		growth factor		-0.807		1.78e-06	ACTA2,BDNF,BMP6,CCND1,CDKN2A,COL1A1,EPCAM,EPHB2,F2RL1,FOXG1,GATA3,KRT18,PPARG,TAGLN,TBX3,Tcf7,TP53,TTYH1,WNT11,WNT5A,WNT7A	810 (25)
ERK1/2		group		1.655		1.88e-06	Abcb1b,AKR1C3,ALPL,APLN,AREG,ATF6,ATP1A3,BDNF,BMP2,C3,CAV1,CCK,CCN2,CCND1,CEBPA,COL1A1,CXCL6,DDIT3,ECE1,ENO1,ESR1,ESR2,F3,FGFR2,FKBP5,FOS,FOSL1,FZD1,GJA1,HAS2,HLA-A,HPGD,ICAM1,IFIT1,IGFBP3,IL1A,IL6,KCNH2,KRT17,LEPR,MMP3,NOX4,PLAUR,POSTN,PRKCZ,PTGER4,PTN,RB1,Saa3,SLC12A4,SOX2,TACR1,TIMP2,TNF,VCAM1,VCAN,VNN1	701 (19)
BMP2	2.538	growth factor	Activated	2.571		1.98e-06	ACTA2,ALPL,ATF6,ATP2C2,BMP2,BTG3,CCND1,CDH1,CLDN3,COL10A1,COL1A1,COL1A2,CREB3L1,CTSK,DMP1,DPYSL2,F3,FGFR2,FOS,FZD1,GFRA1,GREM1,HAS2,IGFBP5,L1CAM,MRAS,MSX1,NFATC1,NTRK3,POSTN,PPARG,PTH1R,SMAD6,SOSTDC1,SOX2,SOX6,SPINT1,TAGLN,TIMP3,TNFRSF11B,TOB1,TUBB3,VCAN,WNT4,ZBTB16	785 (22)
U0126		chemical drug	Inhibited	-2.069		2.2e-06	ACKR3,ACTA2,ADORA2B,ALPL,APC2,AQP1,AQP3,ARC,AREG,BDNF,BMP6,C3,CAV1,CCN2,CCN5,CCND1,CDH1,CEBPA,CELSR2,CLDN4,COL1A1,CYP1B1,DDAH1,DDIT3,DES,DMP1,EDNRB,EHF,ENPP2,ENPP4,EPCAM,ESR1,F3,FAIM2,FGFR2,FKBP5,FOS,FOSL1,GALNT3,GDF15,GJA1,GRAMD1B,Gsta4,HPGD,ICAM1,IDI1,IL13RA2,IL17RB,IL1A,IL6,KCNN4,LAMB3,LIFR,LORICRIN,MDM2,ME1,MMP3,NETO2,NFATC1,NOS1,NREP,OCLN,PDX1,PGR,PLA2G4A,PLAUR,POSTN,PPARG,PRSS22,RND3,RORC,S…	785 (19)
STAT4	0.218	transcription regulator	Activated	3.448	bias	2.25e-06	ACAP1,ACSS1,ALDOC,ANGPTL6,C3,CAPN5,Cxcl9,DAPK2,FSCN1,GATA3,GJA1,GRTP1,Ifi202b,IL12RB1,IL18R1,IL6,ISG15,ITGA7,JAG2,KCNK7,KRT18,MBOAT2,MGARP,Mx1,P4HA2,PBX4,PKP2,PLAC8,PLOD2,PRDM1,PRDM16,RAMP1,RCN3,RNF128,RORA,S100A4,SAT1,SELENBP1,SERPINB1,SERPINB5,SMPDL3A,Tcf7,TNF,UNC13D,VLDLR	784 (15)
IL17A		cytokine		1.255		2.26e-06	ACTA2,AREG,C3,CCK,CCN2,CCND1,CDH1,COL10A1,COL1A1,COTL1,CTSK,CXCL6,Cxcl9,CYP7B1,DLX1,DUOX2,EDIL3,ELF3,FOS,FOSL1,ICAM1,IL1A,IL1RN,IL33,IL6,ISG15,KLK11,KRT17,LCN2,LOX,LRRK2,MMP3,MRC1,MYO6,NFATC1,Nppb,NTN1,OCLN,PGF,PPARA,PPARG,PRDM1,PTGFR,RORC,Saa3,Tgtp1/Tgtp2,THBD,TIMP2,TIMP3,TNC,TNF,TNFRSF11B,TP63,VCAM1,VIM	724 (15)
TENM1		transmembrane receptor		1.134	bias	2.46e-06	CHL1,EDNRB,ERBB3,MGP,SEMA6A,SLC1A4,SOX5
CTBP1	0.194	enzyme		-0.931		2.52e-06	ACKR3,C8orf44-SGK3/SGK3,CDH1,CDKN2A,COL1A2,ENPP2,FKBP5,FOS,FSCN1,JUP,KRT8,MMD,OCLN,SMAD6,TNF,VCAN	459 (6)
MKNK1	-0.937	kinase		-0.497	bias	2.69e-06	ADAMTSL3,AGRN,ARVCF,ATP1A3,CAMK2B,CD34,CDKN2A,COL4A6,CP,CPLX2,DMP1,DNM3,Dnm3os,DPYSL3,EPB41L2,FOS,GNAI1,GPC4,HS6ST2,HSPA2,ISG15,LCN2,MAP1B,MGP,MMP3,MYO6,Nppb,NREP,NUP210,Rab15,RGS5,SFRP1,SLITRK6,SNAP25,TAGLN,TNF,VIM,VSNL1	264 (7)
zinc		chemical drug		0.009		2.69e-06	BDNF,CCK,CCND1,CDKN2A,CNN1,COL1A1,ENO1,FETUB,GPLD1,IDI1,IL6,KRT16,MGP,NGFR,PDE4A,RB1,SCD,SELENBP1,SERPINB2,SLC6A4,TMPRSS11D,TNF,TP53	632 (20)
PRL		cytokine		1.537		2.7e-06	A2M,AKR1C3,CAMK1,CAPN2,CAV1,CCND1,CDH1,CISH,CLDN3,COL1A1,COL1A2,COL5A1,CPD,DES,ENO1,ERBB3,ESR1,ESR2,FOS,IFIT1,IGFBP3,IGFBP5,IL6,ISG15,KRT14,KRT15,KRT19,KRT5,Marcks,MGP,MGST1,MICOS10-NBL1/NBL1,MSN,OAS2,OCLN,ODC1,PAQR7,PAQR8,PARM1,PC,PCOLCE,PDPN,PTGFR,SFRP2,TIMP2,Tmsb4x (includes others),TNF,TNFSF13B,TP53,TP63,TPH1,VIM,Wfdc18	981 (21)
HMGA1	-0.841	transcription regulator		0.429		2.77e-06	ACTA2,ALPL,ARL4A,B3GALT5,CAV1,CCND1,CDH1,COL1A1,COL1A2,COX6A2,CRYAB,DDIT3,ESR1,FOS,FOSL2,FSTL1,GNA15,HS3ST1,IDI1,IGFBP3,IGFBP4,IGFBP7,IL6,KITLG,Mt3,MVD,NECTIN1,Pou3f1,PPARG,PTH1R,PTPRU,SOX4,SRPX,TAF9B,TAGLN,TFAP2C,VIM,WNT6,ZFP57	764 (21)
ARNT2	1.076	transcription regulator	Activated	3.086	bias	2.9e-06	ADAM28,AOX1,AQP4,CDH3,CELF2,COL11A1,COL12A1,CPXM2,EYA1,GPX3,GRIN1,GZMH,HGFAC,HLA-A,ICAM1,IGFBP4,KCNJ15,KRT5,LAMB3,LCAT,LIFR,LTF,MYCL,NFATC2,PADI3,PLA2G5,PLCB1,POSTN,PTPN22,Rpl29 (includes others),SELENBP1,SNN,SPRR1A,ST6GALNAC6,SYT7,TCF7L1,THRB,TNF,TSC22D3,UGT1A6,Zfp108/Zfp93,ZFP36L1
AKT1	-0.181	kinase		0.175		3.1e-06	ACAT2,ACTA2,ANKRD1,AR,ARL6IP1,BMP2,CCND1,CDH1,CISH,CXCL6,ENO1,ESR1,FABP5,FBXO32,FOS,FSTL1,GATM,GCLM,GDF15,GSTA5,GSTM5,Gstt1,IGFBP5,IL6,LCN2,Luzp4 (includes others),MDM2,ME1,NFATC1,NFATC2,NOTCH3,NOX4,NQO1,PCOLCE,PGR,PIK3R1,PLA2G4A,PPARA,PPARG,PPARGC1A,PROM1,RAMP1,RAMP3,SCD,SERPINF1,SORT1,TGFBR3,THBS2,TNF,TNFSF10,TP53,TP63,TP73,VCAN,VIM	664 (17)
miR-338-3p (miRNAs w/seed CCAGCAU)		mature microRNA		0.187	bias	3.13e-06	ADAMTS14,CCND1,COL1A1,COL1A2,COL4A5,COL5A1,COL5A2,LOXL4,NID1,PDGFB,PLOD2,TAGLN,VCAN,VIM
cerivastatin		chemical drug		-0.616		3.2e-06	BMP2,CCN2,COL1A1,CYP1B1,ENPP3,F3,FDPS,ICAM1,IDI1,IL6,MAL,NET1,PCSK9,PLAUR,PPARA,PPARG,PTGDS,TGFBR3,THBD,TNF,TSC22D3,VCAM1	661 (16)
PD173074		chemical reagent	Activated	2.484	bias	3.37e-06	CCND1,CEBPA,DEPP1,ELF3,F3,GABRP,GATA3,HOPX,ITGB6,KRT23,KRT7,MFAP5,MUC15,MXD1,OVOL1,PGF,PPARG,PRKCH,PRR5,TFAP2C,UPK1A,UPK1B,VTCN1
F7	0.179	peptidase		0.092		3.44e-06	AR,CCN2,CCND1,CLDN1,F3,FOS,FOSL1,ICAM1,IL6,MMP7,PLAUR,RND3,SERPINB2,TNF,VCAM1	689 (17)
DIO3		enzyme		-0.572		3.46e-06	Abcb1b,ADAMTS16,ADAMTS5,ART3,BSPRY,CDH3,CEACAM16,EPAS1,FGF11,FLYWCH2,FOXQ1,FXYD6,GDA,GREB1,GSTA5,HLA-A,HOXD10,ISLR2,ITGA7,KCNH1,KY,LZTS1,NXF3,PARVB,PDX1,PTGDS,PTPRR,SEL1L3,SERPINB2,SLC35F2,SLC52A3,SLC9A2,SNED1,TMPRSS13,Tmsb4x (includes others),VCAM1,WNT6	306 (7)
CX3CL1	1.468	cytokine		-0.181		3.55e-06	ADAMTS1,APCDD1,BMP6,CDHR1,CRABP2,DLX1,EFNB1,ERBB3,FABP5,FZD2,HEYL,ICAM1,IL1A,IL6,LPAR1,MAP1B,Meis1,MEIS2,MICOS10-NBL1/NBL1,PDX1,POSTN,PPARG,PROM1,SDK2,SEMA5A,SERPINF1,SNAP25,SOX4,SPHK1,TFAP2C,TNF,WNT6	771 (20)
carbon tetrachloride		chemical toxicant	Activated	2.593		3.68e-06	ACTA2,AK4,AOX1,BMP3,CCN2,COL1A1,COL1A2,CXCL6,DAGLA,DDIT3,DES,FAAH,FOS,FOXA1,GDF15,Gsta4,GSTA5,ICAM1,IGFBP5,IGFBP6,IL13RA1,IL13RA2,IL6,ME1,NDRG2,NQO1,NR1H4,ODC1,PDGFB,PDX1,PPARG,PPP1R15A,PRKCH,PROM1,RB1,RBP1,SLC8A1,SPHK1,Sult1a1,TIMP2,TIMP3,TNF,UGT1A3,VCAM1,VIM	718 (16)
FOXA1	2.674	transcription regulator		-0.644		3.85e-06	ACTA2,ACTG2,AQP1,AQP3,ARHGEF9,BMP2,CDH1,CDKN2A,CNN1,COL18A1,DSE,EPHX1,ERBB3,ESR1,FOXA1,FOXA3,FOXC1,FSTL1,GFRA4,GREB1,HHIP,IL6,ISL1,KRT16,MGP,MYL9,PGR,PPARA,PPP1R14C,RORA,RORC,TAGLN,TMPRSS2,TNF,Tpm2,UST	823 (21)
glutamine		chemical - endogenous mammalian		1.797		4.06e-06	ACTA2,ADA,ASNS,ATF5,ATF6,BCAT1,CCND1,COL1A1,DDIT3,FABP5,FOS,HSPA1A/HSPA1B,ICAM1,IDH1,IGFBP2,IL6,NGFR,PCK2,PDGFB,PPARGC1A,PROM1,SOX2,THBS2,TNF,TP53,TUBB4A,VIM	757 (20)
trans-hydroxytamoxifen		chemical drug		0.054		4.09e-06	AREG,ARHGAP24,CAV1,CCN5,COL1A1,COL1A2,COL4A5,CYP1B1,EPB41L3,ERBB3,FZD8,GNE,GREB1,GSTA5,IGFBP4,INPP5J,IRF6,KRT7,KYNU,L1CAM,LHFPL2,LOX,LOXL3,LOXL4,MB,MMD,MPPED2,MYBL1,MYO1B,PLOD2,RBPJ,RND3,SELENBP1,SERPINF1,SFRP1,THBS2,TM4SF1,TTC9	649 (13)
SMAD4	-0.162	transcription regulator	Activated	2.907		4.14e-06	ALPL,ANGPT1,AREG,BBC3,BGN,BMP2,CCL24,CCN2,CCND1,CDH1,CDH3,CDKN2A,CDKN2B,CELF2,CLDN7,COL10A1,COL1A2,CXCL6,FBXW10,FOS,FSCN1,GJA1,HAS2,HEBP1,HHEX,HMCN1,ICAM1,ITGB7,JAG2,KITLG,KLK11,LPAR1,MDM2,MST1R,Msx3,NOTCH3,NPR2,OVOL1,PAK3,PDGFB,PTHLH,SCD,SMAD6,SOX2,SPHK1,SSTR2,TBX3,TIMP3,TNC,TNF,TNFRSF10A,Tpm2,VIM	839 (23)
LMO2	0.514	transcription regulator		-1.236		4.14e-06	ACOX2,ACVR1B,ANGPT1,ARID3A,BBC3,BCL11A,BCL9,C8orf44-SGK3/SGK3,CD34,CDKN2A,CGAS,CLDN4,COL18A1,DAB2IP,DACT3,DLX1,EGLN3,ESR2,FBLN1,FES,GALNT1,GATA3,GJA1,GSDME,HHEX,Ifitm1,IL34,ITGAE,ITGB7,JARID2,LGALS1,LHFPL2,NLRP10,NOTCH3,NT5E,PCBP3,PDZD2,PLA2G4A,RAPGEF5,RPS6KA2,RXRA,SERPINF1,SLC43A1,SLC5A9,SLIT1,SOBP,Tcf7,TMEM38B,TNFRSF10A,TNS2,TRAF1,ZMAT3,ZNF518B	132 (4)
WNT5A	3.383	cytokine		-1.431		4.22e-06	ADGRL3,AREG,ARG1,BAIAP2L2,BIN1,BMP6,BTG2,C15orf65,CCK,CCND1,CDH1,CLDN4,COL1A1,CRYAB,CXCL6,DKK2,DLX1,ENPP2,ESR1,ESR2,FOXN1,GJA1,GREM1,IL1A,IL6,ITGB7,LAMB3,MMP3,MMP7,NFATC2,NT5E,PGF,POSTN,PRKCI,PRSS12,SEMA3E,SERPINB2,TNF,TNFSF10,VIM	751 (18)
EFNA2	1.557	kinase	Activated	2		4.29e-06	ABCA12,BDNF,CCN2,CRABP2,DSG1,FABP5,FOSL1,FOXQ1,KRT13,KRT16,KRT18,KRT4,KRT7,NOS1,NT5E,PKP1,PTHLH,TGM1
aflatoxin B1		chemical - endogenous non-mammalian	Activated	2.885	bias	4.42e-06	A2M,Abcb1b,ALDH3A1,AOX1,ATF5,CCN5,Cd24a,Cdkn1c,CLDN1,COL14A1,CRYAB,CYP3A5,EDNRB,EGLN3,EHF,ELAVL2,EPCAM,FADS1,FADS2,FAM83F,GCLM,GDF15,GJA1,GNAI1,GPLD1,GPX2,GRIA3,GSTA5,HLA-A,HTATIP2,IDI1,IGFBP7,LAMC2,LEPR,MAP1B,MDM2,MGAT3,Muc1,MYBL1,NAP1L2,NQO1,PHLDA3,RGS5,SEMA3B,SERPINB1,SFRP1,SGCB,SLC5A1,SORT1,TP53,UGT1A3,UGT1A6,VLDLR,WNT4
IRS1	1.525	enzyme	Activated	2.299		4.53e-06	BMP6,CCND1,CDH1,CDKN2B,CEBPA,CRABP2,DDIT3,FBXO32,FHL1,FOS,GATA3,GJA1,GLRB,IGFBP4,IL6,MAPK12,PIK3R1,PPARG,PPARGC1A,PRDM16,PTPRF,RHOU,SFRP2,SLC2A4,TAGLN,Tcf7,TNXB,TRIB3,WNT10A,WNT5A,WNT6	682 (23)
EN1		transcription regulator		1.844	bias	4.65e-06	ACTA2,ALDOC,CCND1,COL1A1,COL1A2,NGFR,PAX5,PLCB4,TUBB3	704 (16)
ID2	0.135	transcription regulator		-0.324		4.75e-06	ACTA2,BTG2,CCND1,CDH1,Cdkn1c,CDKN2A,E2F2,G6PC3,GATA3,ICAM1,IGFBP4,IKZF2,IL17RB,IRF6,LEPR,LGALS1,LRIG1,MAP2K6,MECOM,MPZ,NFATC1,NGFR,PIK3R1,PROM1,PTPN13,PTPN22,REL,RORA,RPS6KA2,SMOC2,SOX13,SOX4,SOX5,Tcf7,TGFBR3,TNFRSF19,TNFSF10,TRAF1,TRAF3,VANGL2,VCAM1,WNT11,WNT6,ZBTB16	658 (19)
CLDN6	-7.066	other				4.78e-06	ATF6,CLDN1,CLDN3,CLDN4,CLDN7,CLDN8,Flg,LORICRIN,RPTN,SPRR1A,Sprr2d,Sprr2g
fulvestrant		chemical drug		-0.723		4.79e-06	ACOX2,ADRB1,ANKS1B,AREG,ASNS,AXL,BMP2,C3,CA12,CAV1,CCDC80,CCN5,CCND1,CDH1,EPHA1,ERBB3,ESR1,ESR2,FOS,FOSL2,GJA1,GJB2,GREB1,GSTA5,HES1,ICAM1,IGFBP5,LEPR,LTF,MAP2K6,MB,MMD,MYO1B,NGFR,NOS1,NQO1,PAX5,PDCD4,PGR,PPARG,RB1,SSTR2,TGFBR3,TNF,TNFRSF11B,TP53,TSC22D3,TTC9,VCAM1,VIPR1,WNT4,ZMAT3	798 (18)
CD44	-0.602	other		1.67	bias	4.83e-06	ABCA5,ACKR3,ACTA2,BGN,CCND1,CDH1,COL18A1,COL1A1,COL5A2,CRABP2,CTSK,CXADR,CXCL6,Cxcl9,DDIT3,FKBP5,HAS3,IL1A,IL1RN,IL6,LGALS1,LY6D,MMP3,MMP7,MYO1B,NOX4,NPNT,PARVB,PDCD4,PMEPA1,PTHLH,SFRP2,SOX2,SPINK5,STEAP1,THBS2,TIAM1,TNF,Tpm2,VCAM1,VIM,WNT5A	680 (17)
TP73	7.79	transcription regulator		1.654		4.85e-06	ACTA2,ADA,ADORA2B,AEN,AQP5,ARHGAP22,BBC3,BTG2,C1R,C3,CCN5,CDH1,Cdkn1c,CLIP3,CLMN,COL18A1,COL1A1,COL5A2,CRYAB,DDIT3,DHRS3,DRAM1,FAM78B,FGFR2,GBX1,GPR137B,GPR176,HES1,HSPA1A/HSPA1B,HTATIP2,IGFBP3,IGFBP4,IGFBP5,IGSF3,IL6,JAG2,KCNK1,LDHD,LY6D,LZTS1,MDM2,MICOS10-NBL1/NBL1,MPZL2,NCAM1,PDGFB,PDPN,PERP,PIEZO2,PIK3R3,PMP22,RB1,SAT1,SERPINB6,SERPINF1,SERPING1,SFN,SLC4A3,SPINT1,THBS2,TIMP3,TNFRSF10A,TP53,TP…	678 (15)
CCN2	2.204	growth factor		1.292		4.89e-06	ADAMTS1,ADAMTS5,CAVIN2,CCN2,CCND1,COL10A1,COL1A1,EGLN3,ENO1,ESR1,FZD2,HES1,IL6,KITLG,LOX,LOXL1,LOXL3,MMP3,PDE7A,PDGFB,PTGFR,PTH1R,SOX2,SOX4,TIMP3,TP53,WNK1	786 (21)
nelfinavir		chemical drug	Inhibited	-2.127	bias	5.06e-06	ANGPTL6,ASNS,CA6,CEBPA,CH25H,CHAC1,DDIT3,DDR2,FAM102A,ISL2,MTHFD2,PCK2,PPARG,PPP1R15A,Serpina3g (includes others),SLC1A4,SOAT2,TGM1,TNFRSF11B,TRIB3,TSC22D3,VLDLR
gentamicin		chemical drug		-0.52		5.08e-06	2610528A11Rik,Abcb1b,ACSM3,ADRB1,AGMO,AK1,ALCAM,ALPL,AQP1,BMP6,BTG2,BTG3,CCND1,CHKA,CSRP2,DAGLA,DDIT3,ENPP2,EPB41L2,FOS,GARNL3,GATM,GDF15,GJB2,Gm3383 (includes others),GSTM5,GUCA2A,HSPA1A/HSPA1B,ICAM1,IDH1,IGFBP3,IGFBP5,KYNU,L3HYPDH,LCN2,LGALS1,MDM2,MYO1B,NAV2,NPNT,NUAK1,PC,PTGDS,PTH1R,PTN,PTPRZ1,Pvr,S100A1,SDC3,SLC1A1,SOX4,Sult1a1,SUOX,TMC7,TNF,TP53,TSC22D1,TTC36,UGT8,VCAM1,ZFP36L1	719 (18)
Ige		complex		1.488	bias	5.16e-06	Abcb1b,AQP3,AREG,ARG1,BCAT1,C3,CAPN2,CAV1,CCL24,CD34,CEACAM1,CEBPA,CHST11,CISH,COL18A1,Crip2,CTSK,CXADR,FXYD6,GDF15,Gstt1,ICAM1,IL1A,IL33,IL6,IRAG2,Marcks,MARCKSL1,Mcpt1,MMD,NFATC1,NGFR,PDGFB,PIGZ,PLA2G12A,PPARG,PPP3CC,PTPN22,PTPRF,RAMP3,Rnf125,RPS6KA2,SCD,SDC3,SERPINB1,SERPINB2,SERPINB6,SLC2A4,SPHK1,TNC,TNF,TNFRSF10A,TNFRSF11B,Tnfrsf22/Tnfrsf23,TNFSF10,TRAF1,TRAF3,VCAM1,VIM	731 (16)
TMPO	0.025	other		1.633	bias	5.4e-06	ASPN,COL11A1,COL12A1,COL1A1,MMP15,TIMP2
phytoestrogen		chemical drug				5.4e-06	AR,BMP2,ESR1,LTF,PGR,SFRP2
ATF4	-1.341	transcription regulator		-1.126	bias	5.49e-06	ANKRD1,AREG,ARHGAP24,ASNS,ATF5,ATF6,BBC3,BCAT1,BCL11A,CDKN2A,CHAC1,DDIT3,DDR2,FAM102A,GDF15,IGFBP2,IGFBP5,IGFBP7,IL6,MGST1,MTHFD2,NAPB,NOX4,PCK2,Pmaip1,PMP22,PPARG,PPP1R15A,PRRX2,RBPJ,SERPINF1,SLC1A4,SLC1A5,SLC39A14,SLC43A1,SOAT2,SSBP2,TNF,TNFRSF11B,TRIB3,WNT11	622 (18)
TGFB2	1.072	growth factor		1.774		5.57e-06	ACTA2,ASPN,CCN2,CDH11,CDKN2A,CNN1,COL10A1,COL1A1,COL1A2,DES,FMOD,FOS,GAS1,HAS2,KCNQ1OT1,LTC4S,NFATC2,PLOD2,PTHLH,SCD,SPHK1,TAGLN,TGFBR3,TIMP2,TMEFF1,TNFRSF11B,VCAN,WNT11	886 (21)
COLQ		other		1.405		5.61e-06	ADAMTS5,AGRN,ASPN,BDNF,BGN,CHRNB1,COL11A1,COL5A2,DOK7,DTNA,FBLN5,FRAS1,GPC4,ITGA7,LRP4,MFAP2,NID1,SGCD,VCAN,WNT4
TET2	0.671	enzyme		0.175		5.72e-06	ADORA2B,AFF3,ATP1A3,CBR1,CEBPA,CHST11,CXCL6,CYP2S1,EPCAM,FOSL2,FOXC1,FOXG1,FXYD4,HAL,Ifitm1,IL6,ISL1,KHDC3L,Orm1 (includes others),PXDC1,RND3,RPS6KA2,SLC26A9,SLC4A11,SLC6A4,SORL1,SOX2,SPINT1,TGM1,Tnfrsf22/Tnfrsf23,TRIB2,ZBTB16	313 (7)
CR1L	-1.352	transmembrane receptor	Inhibited	-2.561	bias	5.95e-06	BGN,C3,CCN2,COL18A1,COL1A1,COL1A2,COL5A1,FBN1,LUM,MGP,PTGER4,TNC,TNF	673 (19)
SPHK1	-2.719	kinase		1.223		6.22e-06	ACTA2,CCN2,CCND1,CDKN2A,COL1A2,DDIT3,ICAM1,IL33,IL6,MAP2K6,Mx1,SPHK1,TAGLN,TNF,TNFSF13B,TP53,TRAF1	707 (21)
cardiotoxin		chemical - other	Activated	2.132	bias	6.32e-06	AOC3,APLN,BDNF,BGN,CAPN6,CCL24,CCND1,Cdkn1c,COL1A1,COL1A2,Cxcl9,E2F2,EDNRB,ERFE,FGF11,FLT3,FSTL1,Ifitm6,IGFBP3,IGFBP7,IL13RA1,IL1A,IL1RN,IL2RG,IL33,IL6,ITGB7,LCN2,LTB4R,LTF,MEST,MMP15,MMP3,MMP7,MRC1,PDGFB,PIGR,PTN,Saa3,SERPINB10,SERPINB2,SERPINF1,SFRP2,TNF,TNFRSF10A,TNFRSF11B,TSC22D1
triptolide		chemical drug	Inhibited	-3.588	bias	6.67e-06	Abcb1b,APLN,AR,BBC3,BMP6,CAV1,CDH1,CDKN2B,EDNRB,F2RL1,FBLN5,FBN1,GCLM,HPGD,ICAM1,IGFBP2,IGFBP3,IL1A,IL6,ITPKB,KITLG,LIFR,MMP11,MMP7,OCLN,PMP22,POSTN,RECK,SOX4,TNF,TNFSF10,TP53	765 (21)
cyclic AMP		chemical - endogenous mammalian	Activated	2.521		7.11e-06	ACTA2,AFAP1L2,ANTXR1,ANTXR2,AOC3,ARC,ARG1,BDNF,BMP2,CCN2,CCND1,CEBPA,CRYAB,DDIT3,DUOX2,EPCAM,F3,FOS,FOSL2,GATA3,GJA1,GOT1,IGFBP3,IGFBP4,IGFBP5,IL1RN,IL33,IL6,INHA,MEST,NFATC1,NOS1,NTF4,ODC1,PGR,PLA2G4A,PPARGC1A,PTHLH,RAPGEF3,RORC,RXRA,Saa3,SERPINB2,THBD,TNF,TNFSF10,TP53,TPH1,VGF,VLDLR	770 (22)
LATS1	0.101	kinase		-1.63	bias	7.44e-06	ALDH1A3,CCN2,CDH1,CLDN4,EPCAM,ERBB3,FOXA1,GATA3,Hmga2,KRT18,KRT19,LTF	433 (7)
CHADL	-0.333	other		-0.577		7.44e-06	COL10A1,CRYAB,CSPG4,DMP1,FAM107A,IGFBP3,IL6,MN1,NTRK3,PTH1R,SMPD3,VCAM1
PDLIM2	-3.55	other		-0.737		7.84e-06	CCND1,CDH1,CRISPLD2,ENPP2,F2RL1,FSTL1,FXYD6,HACD4,IGFBP3,KYNU,MECOM,MPZL2,MYL9,NAP1L2,PDLIM2,PHLDA3,PRUNE2,RASGEF1A,RNF128,SCARA3,SLC43A3,SMOC1,SRGAP1,TAGLN
mir-29		microRNA		-1.901	bias	7.84e-06	ACTA2,ADAM12,ADAMTS14,AOX1,AR,CCND1,CDH1,CLDN1,COL1A1,COL1A2,COL4A5,COL5A2,DNMT3B,FKBP5,FLT3,ITGA11,NID1,PIK3R1,PMP22,SFRP2,TIMP3,TP53,VIM,ZFP36L1	713 (22)
SRF	0.792	transcription regulator	Activated	2.491		8.04e-06	A2M,ACTA2,ACTG2,AMD1,ANKRD1,ARC,AVPR1A,BICC1,BMP2,CCN2,CDKN2B,CLDN1,CLDN3,CNN1,CSRP2,DES,DMKN,EYA2,FHL1,FOS,FOSL1,FOXQ1,GDA,GLIPR1,GSTM5,LCN2,LEPR,LRP4,LTF,MAPK13,Mcpt8,MGAT4A,MGST1,MPPED2,MYL9,MYO1B,MYO1E,NECTIN1,NET1,NFATC2,NOX4,PDX1,PGLYRP1,Ppbp,RAMP1,RND3,Saa3,SERPINB10,SERPINB2,SLC6A4,SLC8A1,SOSTDC1,SPTBN2,TAGLN,TGFB1I1,TJP3,TMEM40,TMEM44,TNC,Tpm2,VCAN	465 (11)
BSCL2	-0.972	other				8.35e-06	AKR1C3,ANKRD1,AOC3,CCND1,CEBPA,GREM1,IGFBP5,IL33,IL6,LGALS12,MARK1,MMP3,NAT8L,PC,PKP3,PNPLA2,PPARG,SLC2A4,Sult1a1	576 (14)
GSTO1	2.839	enzyme		-1.97		8.35e-06	AHNAK2,AREG,CD109,CELSR1,CHAC1,ENPP5,F3,IFIT1,MTUS1,NECTIN3,NPTXR,PARM1,SAT1,SEL1L3,SOX4,SRGAP1,TIAM1,VSNL1,ZFP36L1
FOXO3	0.257	transcription regulator		1.961		8.54e-06	ACTA2,ALDH3A1,ANGPT1,APLN,AQP4,AR,BBC3,BMP2,CAV1,CCN2,CCND1,CDH1,CDKN2B,CH25H,CLDN1,DDIT3,DEPP1,EDNRB,ESR1,FABP5,FBXO32,FGFR2,FMOD,FOS,FOXC1,GPX3,GSTM5,HTATIP2,ICAM1,IGFBP7,IKZF2,IL23R,IL6,LCN2,MTHFD2,MXD1,MYO6,NPNT,NRP2,NT5E,OVOL1,PCSK9,PDE3B,PPARGC1A,PPP1R15A,PRDM1,Prg4,PRKAA2,SERPINB1,SESN3,SIX4,SLC1A4,SOX5,TNF,TNFSF10,TP53,TP53INP1,TP63,VCAM1,VIM	832 (19)
LIPE	0.518	enzyme		-0.493		8.65e-06	ANGPT1,ANKRD1,AQP1,AQP4,CEBPA,CIB2,COL1A1,COL1A2,CP,DMPK,FKBP5,FMOD,FOS,GJA1,HSPA1A/HSPA1B,JUP,KITLG,NET1,PC,POSTN,PPARG,PPARGC1A,RAMP1,RB1,RGS5,RXRA,SCD,SLC2A4,TNF	740 (20)
SIM1		transcription regulator	Activated	3.086	bias	8.9e-06	ADAM28,AOX1,AQP4,CDH3,CELF2,COL11A1,COL12A1,CPXM2,EYA1,GPX3,GRIN1,GZMH,HGFAC,HLA-A,ICAM1,IGFBP4,KCNJ15,KRT5,LAMB3,LCAT,LIFR,LTF,MYCL,NFATC2,PADI3,PLA2G5,PLCB1,POSTN,PTPN22,Rpl29 (includes others),SELENBP1,SNN,SPRR1A,ST6GALNAC6,SYT7,TCF7L1,THRB,TNF,TSC22D3,UGT1A6,Zfp108/Zfp93,ZFP36L1
TFAP4	0.57	transcription regulator		-1.44		8.96e-06	CDH1,CDKN2A,CLDN1,CLDN4,CLDN7,CXCL14,ESRP2,FOS,GDF15,IRF6,MDM2,OCLN,OVOL1,PHYHIP,PKP3,VIM
MIRLET7		group	Inhibited	-2.121	bias	9.02e-06	ACTA2,ACVR1B,BCL11A,COL1A1,COL1A2,COL4A5,COL5A2,Hmga2,IL6	564 (13)
troglitazone		chemical drug		-1.069		9.68e-06	ABCA12,ACOT2,ACTA2,Aldh1a7,ANGPTL6,AQP3,AR,ARHGEF19,ATP10B,C3,CAV1,CCK,CCND1,CD34,CDH1,CDKN2A,CEBPA,CIB2,COL1A1,COL1A2,CRYAB,CXCL6,CYP3A5,DDIT3,DGAT2,DHRS3,E2F2,EGLN3,EPHA1,FABP5,FADS2,FOS,FOSL1,GDF15,ICAM1,IL13RA2,IL6,KRT13,KRT14,LTC4S,ME1,MMP3,NOTCH3,Nppb,OSBP2,PC,PDE3B,PDX1,PPARA,PPARG,PPARGC1A,RB1,SCD,SERPINB5,SLC27A1,SLC2A4,TMPRSS4,TNF,TP53,TRIB3,UGT1A1,UGT1A6,UPK1A,UPK1B,VCAM1	899 (20)
Ca2+		chemical - endogenous mammalian	Activated	2.267		9.74e-06	ACTA2,AQP5,AR,ARC,BDNF,CASP14,CCK,CCND1,CDH1,COL1A1,CYP1B1,DDIT3,DES,E2F2,ELF3,FAAH,FABP5,FGFR2,Flg,FOS,FOSL1,FOSL2,GAD2,GJA1,GRIP1,ICAM1,IL33,IL6,KCNG1,KRT8,LORICRIN,MGP,MXD1,NFATC2,NGFR,NOS1,ODC1,PADI1,PADI3,PPARA,PPARG,PPARGC1A,SERPINB2,SSTR2,TAGLN,TGM1,TIMP2,TNF,TRPC1,VCAM1	822 (22)
TCF12	-0.332	transcription regulator		-0.113		9.97e-06	ARSA,CACNG4,CDH1,CDKN2A,CDKN2B,EPCAM,ESR1,FLT3,GATA3,GJA1,GJB2,IKZF2,IL18R1,ITGB7,LY6D,MVD,NGFR,NOTCH3,PAX5,PPARG,PTPN13,PTPRU,RORA,RXRA,SEMA4A,SOX13,SPO11,TUBB3,VGF,VIPR2,ZBTB16	90 (3)
fenofibrate		chemical drug		-0.761		1.02e-05	Abcb1b,ACOT2,AR,ASNS,CCND1,COL1A1,DDIT3,DGAT2,EHHADH,FADS2,FBXO32,FOXA3,GAL3ST1,GLCE,GNB4,GOT1,GPX2,Gsta4,HDGFL3,ICAM1,IL6,JAG2,LCAT,LY6D,MEST,MPDZ,Nppb,NUDT7,PANK1,PCK2,PDX1,PIK3R3,PNPLA2,POPDC3,PPARA,PPARGC1A,PTPRF,RORA,SCD,SLC27A1,SLC2A4,THRB,TIAM1,TNF,TP53,TP53INP1,UGT1A4,VCAM1,VLDLR	691 (20)
SFRP1	6.447	transmembrane receptor		0.545		1.09e-05	ACTA2,CCND1,CDH1,COL1A1,EPCAM,GATA3,IL6,KRT18,MMP3,SCD,SDC2,SFRP1,SLC2A4,Tcf7,TP53,TTYH1,VIM	636 (17)
PTEN	-0.938	phosphatase		1.552		1.1e-05	Akr1c12/Akr1c13,AKR1C3,ANGPT1,AR,ARG1,BACE2,BBC3,BNIPL,BTG2,C3,CA12,CAMK2B,CCND1,CDH1,CDKN2A,CDKN2B,CEBPA,CELSR1,CENPS/CENPS-CORT,CLDN1,COL5A2,CST6,DNPH1,EHHADH,EPAS1,ERBB3,ESR1,F3,FDPS,FES,FGF19,FGFR2,FOS,GATA3,GGT1,GPR146,GPR160,GPR176,GPR27,GPR63,GPRC5C,GPX3,HCN2,HGFAC,Hmga2,HOXA10,HOXA11,HSPA1A/HSPA1B,IDI1,IGFBP2,IGFBP3,IGFBP5,IGFBP6,IL6,ISG15,JAG2,KRT19,L1CAM,LAD1,MAL,MDM2,ME1,MMP3,MRC1,Muc1…	744 (21)
Immunoglobulin		complex	Activated	2.149		1.13e-05	ACTA2,APLN,AQP4,ARC,AREG,ARG1,ARRDC2,BDNF,BMP2,CD1D,CDH1,CH25H,CHN2,CISH,CLDN8,COL1A1,COX6A2,CRISPLD2,Csprs (includes others),CXCL6,Cxcl9,CYP1B1,DOK1,DPYSL2,DSP,EDNRB,ENO1,ENO3,ENPP3,EPOP,F3,FAIM2,FAM107A,FGFR2,FKBP5,FOS,G6PC3,GATA3,Gm3383 (includes others),GZMH,HAL,HLA-A,HLA-E,HSH2D,ICAM1,IFIT1,Ifitm6,IGFBP4,IKZF2,IL17RB,IL18R1,IL1A,IL1RN,IL2RG,IL33,IL6,ISG15,ITGAE,JCHAIN,JUP,LCN2,LGALS1,LTB4R,M…	822 (17)
GNA14	0.991	enzyme				1.14e-05	ADAMTS1,ANKRD1,ARG1,AVPR1A,BMP2,BTG2,CNN1,CSPG4,HAS2,IL1RN,IL6,KCNK2,KCNK6,MGST1,Nppb,PLAUR,SELENBP1,SPHK1,Ugt1a7c,ZFP36L1	486 (11)
EHF	8.265	transcription regulator	Activated	2.478		1.16e-05	CCBE1,CDH3,CDKN2A,CNFN,CRABP2,EHF,FOXN1,GRHL3,HOPX,IL1RN,IL6,MMP3,NOTCH3,PGLYRP3,PGLYRP4,PLAUR,RBPJ,SCEL,SPRR3,TFPI,THBD,TNC,VNN1,ZFP36L1	300 (6)
SMARCB1	-0.152	transcription regulator	Activated	3.173		1.16e-05	A2M,ATP1B1,BMP2,CCND1,CDH1,CDKN2A,CEACAM1,COL14A1,COL18A1,COL1A1,COL5A2,CYP39A1,Defb1,DSC2,DSG2,FGFR2,FOS,GJA1,GJB2,GLI3,HES1,IGFBP2,IL1A,JUP,KRT19,MDM2,NUP210,PC,PDGFB,PERP,PGLYRP1,PLCL1,POSTN,PPARG,PTN,RAB3B,RND3,S100A1,TP53,WNT3A	750 (21)
actinomycin D		biologic drug		-1.837		1.17e-05	Abcb1b,AQP5,AR,ARC,AVPR1A,BBC3,BDNF,CAV1,CCK,CCN2,CCND1,COL1A2,CPD,EGLN3,EPAS1,F3,FOS,FOSL2,GDA,GSTM5,IGFBP4,IGFBP5,IL6,LTB4R,MDM2,MMP3,Nppb,PAPPA,PERP,PLAUR,PPARG,PTH1R,PTHLH,SCNN1B,SDC3,SFRP1,SLC12A4,SLC27A1,SPHK1,TACR1,THRB,TNF,TNFRSF10A,TP53,TRAF1	695 (12)
DSCAML1		other	Activated	3.545		1.18e-05	BMP6,CNTN1,CNTNAP1,MAP2,NOS1,NOTCH3,PAX5,PDGFB,PLCB1,PLXNA4,PLXNC1,PRKCH,ROBO2,SEMA4G,SFRP1,SLC29A4,SOX21,SOX6,TUBB3,TUBB4A,UNC5A,VGF,VLDLR
BAPTA-AM		chemical reagent		-1.158	bias	1.2e-05	AQP5,BDNF,CCK,CDH1,CISH,COL1A1,CYP3A5,DDIT3,FAM3B,FOS,ICAM1,IL6,NFATC1,SLC2A4,TNF,VCAM1	602 (21)
PI3K (complex)		complex		1.952	bias	1.26e-05	ADAM12,ADAM28,APLN,BBC3,CCN2,CCND1,CDH1,CDKN2B,COL1A1,DDIT3,Defb1,FABP5,FBLN5,FBXO32,FOS,FOSL1,GATA3,GCLM,GJA1,GSTA5,GSTM5,HAS3,ICAM1,IFIT1,IGFBP2,IL1RN,IL33,IL6,INHA,LCN2,MAP2,MRC1,MTHFD2,NFATC1,NOX4,NQO1,PDCD4,PDX1,PLA2G4A,PLA2G5,POSTN,PRDM1,PRKCZ,RND3,SLC12A4,TAGLN,TNF,TNFRSF10A,TNFSF10,TP53,TP63,TUBB3,VCAM1	810 (21)
RAF1	0.098	kinase		1.845	bias	1.27e-05	ACAT2,AMD1,ANKRD1,AREG,CCN5,CCND1,CDKN2A,CDKN2B,CLDN1,CRYAB,CSTA,DHRS3,EMP3,ESR1,FGFBP1,FOS,IGFBP3,IL6,LAD1,LIFR,MMP3,MXD1,Nppb,NQO1,OCLN,PC,PLAUR,PRDM1,PRSS3,PTHLH,RND3,SCNN1A,SELENBP1,SERPINB2,ST6GALNAC2,TFPI2,TIAM1,TNF,Tpm2,TRAF1,TSC22D1,TSPOAP1	742 (16)
PAX3		transcription regulator		1.98		1.33e-05	ARC,ASNS,ATP2B4,CDH3,COL1A2,CYP1B1,DNM1,EYA2,F2RL1,F3,FHL1,FLT3,GSTM5,IGFBP2,IL6,LAMB3,LRRC17,MCC,MDFI,MDM2,MEST,MGP,MICB,OLFM1,PGF,PITX1,PKIA,PTHLH,RARRES2,SFN,SOX4,TFPI2,TIMP3,TNC,TP53,TRPC1,TSC22D1,TSPAN7,VCAN	510 (10)
SNAI2	1.151	transcription regulator		-1.29		1.35e-05	ANKRD1,AR,AXL,BBC3,CCN2,CCND1,CDH1,CDH3,CLDN1,COL1A1,DSP,EPCAM,HPGD,JUP,KRT18,L1CAM,OCLN,TP63,VIM	552 (24)
IQGAP2	2.3	other		0.863		1.39e-05	CCND1,CDH1,FOSL1,SFRP1,SFRP2,WIF1,WNT4,WNT5A	516 (7)
spironolactone		chemical drug		-0.322		1.4e-05	CCN2,COL1A1,COL1A2,CYP3A5,DES,EDNRB,FKBP5,HHIP,ICAM1,IL6,IP6K3,KCNMA1,LOX,MICB,Nppb,PGF,PPARG,PRDM16,SCD,SCNN1A,TIMP2,TIMP3,TNF,TSC22D3	646 (16)
KDM3B	-0.26	enzyme	Inhibited	-2.714	bias	1.43e-05	ABCA12,ADAMTS1,ARL6IP1,C1R,CCN2,COLEC12,DEGS2,DGKH,FADS2,FRMD4B,KALRN,KIF26B,MB,NOTCH3,PALLD,PALMD,PAPPA,PRUNE2,SORL1,TSPAN7
GDF11	-1.943	growth factor		-0.672		1.43e-05	ALPL,BAMBI,BMP2,CDKN2B,COL10A1,COL1A1,CTSK,FOS,ICAM1,IL6,LAMB3,MMP3,NFATC1,Nppb,PDGFB,PPP2R2C,PRKAA2,SMAD6,TNF,VCAM1	731 (20)
LGALS3	-1.528	other		0.757		1.5e-05	CCND1,CEBPA,COL5A2,ENPP2,FSCN1,GFRA1,ICAM1,IGFBP5,IL6,ITGA10,KRT18,KRT19,LGALS12,LGALS7/LGALS7B,ME1,MGST1,NFATC2,PNPLA2,PPARG,PPARGC1A,PRDM1,PRKCZ,PRSS3,RB1,TNF,VCAM1	709 (16)
SP600125		chemical drug		-1.271		1.51e-05	Abcb1b,ACAT2,AKR1C3,AQP1,ATF6,BBOX1,BDH1,BTG2,CCN2,CCND1,Cd24a,CHAC1,CLDN4,COL1A1,CSPG4,DDIT3,DSG2,EMB,F3,FABP5,FOS,FOXQ1,ICAM1,IL13RA2,IL17RB,IL1A,IL6,ISG15,MMP3,MTHFD2,OSBPL6,P4HA2,PCK2,PGR,PLA2G4A,POSTN,PPARG,PROM1,PTGDS,RB1,Saa3,SCD,SH3RF1,SMPDL3A,SOX2,SOX7,SPHK1,SSBP2,THBS2,TNF,TNFRSF10A,TP53,TRIB3,TTC30B,VCAM1	573 (15)
9,10-dimethyl-1,2-benzanthracene		chemical toxicant		0.319	bias	1.59e-05	AREG,ARG1,CCDC80,CCND1,CDH1,CDKN2A,CYP1B1,EPHX1,Flg,IL6,LORICRIN,MRC1,NQO1,REL,TNF,TP53	791 (19)
erlotinib		chemical drug		-0.381		1.6e-05	AREG,AXL,BBC3,CXCL6,ENAH,F3,FBN1,ICAM1,IGFBP4,IGFBP6,IGFBP7,IL13RA2,IL1A,IL6,MMP3,NFATC1,NOX4,OCLN,PDGFB,PLAUR,SERPINB2,Tmsb4x (includes others),TNF,TNFRSF10A,TNFRSF11B	723 (14)
RET	1.088	kinase		0.489		1.62e-05	BBC3,CCND1,CDKN2A,COL1A1,COL1A2,CRYAB,DES,DPYSL2,EDNRB,FOS,GFRA1,GJA1,HSPA1A/HSPA1B,IL6,ISL1,LOX,MMP3,MMP7,MYO18B,NOS1,PLAUR,PLOD2,PTN,PTPN13,REEP6,SCARA3,TIMP3,TNC,TNF,TP53,VGF,WNT11	604 (18)
FZD8	5.266	G-protein coupled receptor		1.408		1.65e-05	ACTA2,BMP2,CCN2,CDH1,COL1A1,IGFBP5,TP53,VCAN,VIM	597 (13)
KDM1A	0.4	enzyme		0.887		1.66e-05	A2M,ATP6V0E2,BARX2,BMP2,BRDT,C3,CDH1,CLDN7,COL1A1,COL1A2,CSGALNACT1,CXADR,DDR2,DNMT3B,DOK6,EBF1,EPHX1,FLNC,GALNT15,GATA3,GLT8D2,GREB1,HAS3,HLA-A,IGFBP2,IGFBP4,IL1RN,IQGAP2,ISG15,KCNAB2,KRT18,KRT8,LTC4S,LY9,MAP2,MSN,Mx1,MYO1B,NFE2L3,PDPN,Plscr2,PRKG2,PROM1,RARRES2,RHOU,SCD,SERPINB1,SFRP1,SFRP2,SLC1A5,SLC43A3,SNAP25,SOX2,TGM1,TJP3,TM4SF1,TMCO4,TMEM212,TNF,UNC13C,VCAM1,VIM	750 (19)
PPARA	2.656	ligand-dependent nuclear receptor		-0.356		1.68e-05	ACAT2,ACOT2,Acot6,ADTRP,ALDH2,AQP3,ARG1,ASNS,BDNF,C1R,C1S,C3,C5,CCND1,Cd24a,CDKN2A,CEACAM1,CEBPA,CHKA,Clec2d (includes others),CTSE,CYP7B1,EHHADH,FABP5,FADS1,FADS2,FDPS,Flg,FOS,Gsta4,Gstt1,HLA-E,IDI1,IGFBP2,IGFBP3,IGFBP5,IGFBP6,IL1RN,IL6,KRT23,KRT8,KYAT1,LAMB3,LIFR,LORICRIN,LY6D,Mcpt1,MGST1,MMD,MVD,Nppb,NSDHL,OCLN,Orm1 (includes others),PAQR7,PC,PNPLA2,PPARA,PPARG,PPARGC1A,PRDM16,RNF186,SAT1,SCD,…	760 (23)
STAT6	0.176	transcription regulator		-0.168		1.68e-05	ALDH2,ALOX15,AREG,ARG1,CCL24,Cd24a,CHST1,CISH,Clca3a1/Clca3a2,Cmah,COL1A1,COL1A2,CRIP1,CTSE,DDAH1,DUOX2,EHHADH,EPHX1,FADS1,FAM118B,FKBP5,Flg,FLRT2,FSCN1,GATA3,GATM,GNA15,GNB4,HRH1,Ighg2b,IL13RA2,IL18R1,IL1A,IL1RN,IL31RA,IL33,IL6,ISG15,ITGB7,Ivl,Klra7 (includes others),KSR1,LIFR,LORICRIN,LY6D,Mx1,MYO6,NFATC1,NFATC2,PARM1,PHF21B,PIANP,PNPLA2,PPARA,PPARGC1A,PPP3CC,PROS1,RIPK3,SAMD4A,SELENBP1,SERPINB…	720 (17)
PTGS2	0.474	enzyme		-0.512		1.71e-05	Abcb1b,ADGRL3,ANGPT1,AQP1,AREG,BBC3,CCND1,CDH1,CHKA,CTSK,CXCL14,CYP1B1,ERBB3,FOS,ICAM1,IGFBP3,IL6,IRX1,Ivl,Krt10,KRT23,LORICRIN,MMP7,NEB,NKD2,NTN1,PCDH7,Pde4d,PLA2G4A,PLXNC1,PPARG,PRKCZ,PTGER4,TNF,TNFSF10,TP53,TRAF1,VNN1	654 (18)
NFIB	-0.19	transcription regulator				1.73e-05	AQP5,BMP6,EDN2,EFNB1,EYA1,GFRA1,JCAD,KRT8,LOX,LZTS1,NCAM1,NT5E,PVT1,SLC16A14,WHRN
RXRA	2.573	ligand-dependent nuclear receptor		0.167		1.75e-05	ARL4C,ASNS,C3,CCND1,CD109,CDKN2A,CEBPA,CLMN,COL1A1,COLEC12,CRABP2,CRYAB,CYP3A5,EHHADH,EPHX1,FABP5,FADS2,FGF19,FOS,FOXA1,FOXA3,FSTL1,HAS2,HOXD10,IGFBP6,IL1A,IL6,LCN2,LTF,MGP,MMP11,MYL7,NAV2,PC,PCK2,PDGFB,PMP22,PPARA,PPARG,PTGDS,RBP1,RORA,RORC,RXRA,S100A4,SAT1,SCD,SLC27A1,SLC2A4,SLC34A1,THBD,TNF,Ugt1a7c,VCAN	864 (21)
bucladesine		chemical toxicant		1.468		1.77e-05	ADAMTS1,ADGRL2,ALDH3A1,AR,ATP7B,BAMBI,BDNF,CACNA1G,CASZ1,CCND1,Cd24a,CDH1,CRYAB,CYP3A5,EGLN3,F3,FAAH,FOS,FOSL1,FOSL2,GDF15,GJA1,HAS2,HHIP,HS3ST1,ICAM1,IGFBP3,IGFBP5,IGFBP6,IL12RB1,IL23R,IL6,KCNAB2,KITLG,LAMB3,LGALS12,LPCAT1,MMD,NCAM1,ODC1,PADI4,PGR,PTGER4,PTH1R,Pvr,QSOX1,SLC2A4,SLC41A2,SLC6A17,SLC6A4,SMARCA1,SNAP25,SOX7,TGFBR3,THBD,TIMP2,TNF,VGF,WHRN,WNT10A,WNT4	819 (21)
NKX2-3		transcription regulator	Activated	2.133		1.79e-05	ACTA2,ADAMTSL2,AIF1L,ALPL,AOC3,ASNS,BMP2,CAVIN2,CD300LG,CD34,CERK,CRYAB,CXADR,F2RL1,FBN2,FLRT2,GALNT15,GASK1B,GDF15,HES2,MAP2,MEDAG,MFNG,MMP7,NETO2,NT5DC2,PAPSS2,PKIA,PLA1A,PLCB1,Podxl,POSTN,PRSS12,SOX2,SRPX,SRPX2,TENT5A,TFPI2,UNC5A,VCAM1,ZMAT3,ZNF704	242 (7)
LATS2	-1.114	kinase		-1.835		1.82e-05	ALDH1A3,BBC3,CCN2,CDH1,CLDN4,EPCAM,ERBB3,FOXA1,GATA3,Hmga2,KRT18,KRT19,LTF,TP53	619 (17)
RCE1	0.066	peptidase				1.82e-05	CCN5,CRIP1,CRYAB,FBN1,FLT3,FSTL1,GJA1,GPC4,HS6ST2,MGP,MGST1,PAPPA,PRRX2,THBS2
LIMA1	0.736	other				1.89e-05	CDH1,IL13RA2,KRT18,KRT8,MMP7,VCAN,VIM	315 (7)
CD36	0.552	transmembrane receptor		1.802	bias	1.9e-05	AREG,ARG1,ATF6,AXL,COL1A1,CXCL6,DDIT3,ICAM1,IGFBP4,IGFBP6,IGFBP7,IL1A,IL6,MMP3,PDGFB,PLAUR,PNPLA2,PPARG,PPARGC1A,SCD,SERPINB2,SLC2A4,TNF,TNFRSF10A,TNFRSF11B	669 (20)
DICER1	-0.184	enzyme		-0.745		1.92e-05	ARID3A,BDNF,CCND1,CDH1,Cdkn1c,CDKN2A,CDKN2B,CELF2,COL18A1,Cxcl11,Cxcl9,DEPP1,DES,EPCAM,EPHA3,EYA1,FOS,GAD2,HES1,Hmga2,HOXB2,ICAM1,IGF2BP1,IGF2BP2,IL18R1,KCNQ1OT1,Klra7 (includes others),MAP2,MICB,NFATC1,NGFR,PBX3,PDCD4,PELI2,PMP22,Pou3f1,PRKD1,PROS1,PTPRN,PTPRN2,RBM38,RGS5,SERPINB2,SERPINF1,SLC4A4,SOX2,TM4SF1,TNF,TP53,TRIM6,VIM,WNT4,WNT5A,WNT7A	822 (21)
INS		other		0.998		1.94e-05	ACTA2,AQP3,CCN2,CCND1,CDH1,CRABP2,DDIT3,DEPTOR,ERBB3,F3,FADS3,FOS,FOSL1,FOSL2,ICAM1,IGFBP2,IGFBP3,IGFBP4,IGFBP5,IGKC,IL6,NOS1,NOX4,PPARG,PPARGC1A,PRDM16,SCD,SERPINB5,SLC2A4,Tmsb4x (includes others),TNF,TP53,TRIB3,VLDLR	787 (22)
ethanol		chemical - endogenous mammalian		-0.221		1.95e-05	ACKR3,ACTA2,ALDH1A3,ANKS1B,AQP4,BDNF,CAPN5,CBR1,CCN2,CCND1,CEBPA,CGAS,COL1A2,Cxcl9,CYP3A5,CYP7B1,DDIT3,DDR2,EDNRB,EPHX1,ESR1,FAAH,FOS,FOSL1,FOSL2,GDE1,GNAI1,GREM2,GRIN1,Gsta4,GSTA5,HLA-A,HTATIP2,ICAM1,Ifi47,IL1RN,IL6,LGALS1,LRRC75A,MAP1B,MAP2,Meis1,MMP3,MYCL,NGFR,NQO1,NSDHL,OCLN,PCSK9,Pde4d,PNPLA2,PPARA,PPARG,PPARGC1A,RARRES2,RBP1,RORA,SCD,SOX2,STAU2,SYNPO2,TENT5A,TFCP2L1,TFPI2,TIMP2,TNF,TP53,TP5…	704 (18)
lysophosphatidic acid		chemical - other		0.967	bias	2.01e-05	ACTA2,ANKRD1,AREG,CACNA2D1,CCN2,CCND1,F3,FKBP5,FOS,ICAM1,IL13RA2,IL6,MDM2,MPZ,PLAUR,PPARG,PRKCG,SPHK1,TAGLN,TNF,TP53,VCAM1,VIM,WNT5A	625 (19)
RASSF1	-0.412	other		-1.439		2.11e-05	AMIGO2,AREG,CAV1,CCND1,COL13A1,CRABP2,EPB41L3,ESR1,FOS,FRMD4B,GDF15,IGFBP3,MAP1B,MRAS,MTUS1,MYL9,PCDH7,PROM1,PROS1,RASGEF1A,SAMD5,SRPX,TP53INP1	663 (20)
SPDEF	0.783	transcription regulator		-1.739		2.15e-05	CCN2,CD34,CDH11,CLDN7,COL13A1,COL1A1,COL4A5,COL4A6,COL5A1,COL5A2,DKK3,FZD8,PLAUR,PTPRF,SDC2,SERPINB5,TNC,VIM,WNT5A	519 (8)
JUND		transcription regulator		1.331		2.21e-05	BDNF,C3,C5,CCND1,CDKN2A,CSTA,Cxcl9,F3,FOSL1,HPGD,Ifi202b,IKZF2,IL6,MMP3,MMP7,NOX4,PLAUR,SAT1,SERPINB2,SOX4,TNF	802 (20)
KLF2	1.268	transcription regulator		-1.445		2.21e-05	ACKR3,APLN,AQP5,CAV1,CCN2,CDKN2B,CEBPA,CYP1B1,EPAS1,F2RL1,F3,FBLN1,IL2RG,IL6,ITGB7,KCNN4,KITLG,LEPR,LTC4S,NOTCH3,NQO1,PDPN,PGF,PLOD2,PPARG,PRDM1,PROS1,PTGDS,PTHLH,S1PR5,Serpinb9b,TFPI,TFPI2,THBD,TNF,TNFSF10,VCAM1	717 (23)
PRKAG3		kinase				2.22e-05	ACKR3,AMD1,ANKRD1,AQP1,ATP1B1,BTG2,Cbr2,Cdkn1c,CELF2,CRYBG3,FXYD6,GJA1,GOT1,GPX3,IGFBP5,IRX3,JPH1,MAP2K6,MMD,NOS1,ODC1,PDE7A,PHLDA3,POLK,PPARGC1A,RAMP1,RHOU,RNF128,RORC,SLC4A3,SLC7A2,THPO,TMCC2,WNT4
APC	0.303	enzyme		1.012		2.22e-05	APCDD1,AREG,CCK,CCND1,CDH1,CDH3,CLDN1,CLDN4,CLDN7,CLDN9,COL12A1,DHRS9,EPCAM,EPHB3,ESRP1,GLI3,HES1,HES2,ICAM1,IGFBP5,IL6,MMP3,MMP7,OCLN,PLA2G4A,PPARA,PRKCZ,Tcf7,TIAM1,TIMP3,TNF,TNFRSF11B,TNFRSF19,TP53	695 (20)
BRCA1	0.259	transcription regulator		1.726		2.23e-05	AK1,ALDH1A3,ANGPT1,AQP5,AR,AREG,CAMK2B,CARD10,CCND1,Cd24a,CDH3,COL18A1,CYP1B1,DDIT3,ENPP2,ESR1,FKBP5,FOXA1,FXYD3,GDF15,Hmga2,IFIT1,KRT17,KRT5,MDM2,NQO1,PERP,RB1,ROBO1,SAT1,SFN,TNF,TP53,TP63,VCAN,VIM	647 (19)
TCF7		transcription regulator		1.6	bias	2.32e-05	BCL11B,CEBPA,FOS,FOXA1,FOXA3,GATA3,Klra7 (includes others),PPARA,PPARG,PRDM1,RORA,RORC,SDC2,SOX2,Tcf7	486 (13)
KDM3A	-0.014	transcription regulator		0.396	bias	2.49e-05	ACTA2,ALCAM,AR,CCN2,CCND1,CHRNB1,FLNC,GDF15,IL33,PLOD2,SLC45A3,TAGLN,TNC,TNXB	312 (6)
MSX2	1.48	transcription regulator		1.173		2.49e-05	ALPL,AQP3,AQP4,CCND1,COL10A1,FOXN1,GJA1,MSX1,PPARG,PTH1R,TP63,VIM,WNT3A,WNT7A	747 (23)
POR	0.58	enzyme		-1.772		2.52e-05	ACAT2,Aldh1a7,ANTXR2,APCDD1,ASNS,ATF5,BDH1,CLDN3,CYP39A1,CYP7B1,EHHADH,FADS2,FDPS,FLVCR2,FOXC1,GREB1,GSTA5,GSTM5,HLA-A,HLF,Hsdl2,IDI1,Ifitm1,LGALS1,LGALSL,MAP3K6,MVD,Naip1 (includes others),NSDHL,PPARG,RPS6KA2,SCD,STARD4,TMIGD1,UBD,VNN1
WNT1		cytokine		0.85		2.58e-05	ACTA2,APCDD1,CCDC80,CCN5,CCND1,CDH1,Cdkn1c,CDKN2A,CEBPA,DKK2,EFNB1,Elf5,ENPP2,FOS,FZD2,GAS1,HES1,KRT19,KRT5,KRT6B,Meis1,MMP3,MRAS,NOTCH3,PDCD4,PPARG,RHOU,TP53,Wfdc18	799 (20)
FGFR2	6.764	kinase		-0.286		2.58e-05	B4GALNT4,CCN5,CCND1,CDH1,CDH11,COL1A1,DRAM1,FGFR2,FOXQ1,GASK1B,GJA1,GLIPR1,GPR27,H60b/H60c,HES1,HHIP,ICAM1,IL1A,MEST,MRAS,PCOLCE,PLAUR,PTH1R,PTHLH,SFRP1,Skint1,SOX2,SOX7,VCAM1	819 (20)
CTR9	-0.345	other		-0.333		2.58e-05	CLCA2,EPAS1,GREB1,IGFBP4,Meis1,PGR,TIAM1,TP53INP1,TRIM29,USP53	374 (7)
GDF15	-4.641	growth factor		-1.309		2.58e-05	CCND1,GDF15,IL6,Nppb,PLAUR,PNPLA2,RND3,SERPINB5,TIMP3,TNF	745 (17)
epicatechin gallate		chemical drug		-0.126		2.58e-05	ARG1,CDKN2A,GDF15,ICAM1,IL6,MDM2,PERP,TP73,VCAM1,ZMAT3	753 (17)
MBD3	1.12	other				2.7e-05	ALOX12B,CCND1,CDKN2A,DIXDC1,FOSL1,FRAT1,FZD1,HTRA1,MDM2,PPP2R2C,REC114,RHOU,SCD,SFRP1,SFRP2,VANGL2,WNT10A,WNT3A,WNT5A,WNT6,WNT7A	768 (17)
finerenone		chemical drug		1.414		2.72e-05	COL1A1,HHIP,IL6,IP6K3,LCN2,SCNN1A,TNXB,TSC22D3	232 (5)
DSP	8.764	other		0.665		2.86e-05	CEBPA,COL1A1,COL1A2,DSC2,DSC3,GJA1,JUP,PKP1,PPARG	574 (12)
LEF1	-0.037	transcription regulator		0.928		2.86e-05	ACTA2,AR,ATF6,CACNA1G,CAV1,CCND1,CD1D,CDH1,CDKN2A,EPHX1,GATA3,HAS2,IL6,LRIG1,LYSMD2,MAPK12,MMP7,MXD1,Naip1 (includes others),NCAM1,PLAG1,PLCB4,PRDM1,Prg4,SH3GL3,SH3RF1,STX11,TANC2,TIAM1,TP53,TSC22D1,VIM,ZNF467	850 (24)
CD38	-0.622	enzyme		1.263	bias	2.86e-05	ACTA2,ALDOC,ASNS,ATP1B1,CISH,COL1A1,CRIP1,Crisp1/Crisp3,EGLN3,FAM162A,ICAM1,IL6,ITGB7,JCHAIN,KCNAB2,LGALSL,MKRN3,NCAM1,NT5E,PAX5,PPARGC1A,PPP3CC,PRDM1,RBPMS,S100A4,SCEL,SEMA4A,Serpina3g (includes others),SLC16A3,SLC39A8,STK39,VCAM1,VIM	682 (18)
RNA polymerase II		complex				2.9e-05	ALPL,ARG1,ASNS,C3,CA12,CAP2,CBR1,CDH1,CDH11,CDKN2A,CEBPA,CLDN3,COL1A2,Cxcl11,CYP1B1,DDIT3,ENO1,ESR1,FOS,FOSL1,FOSL2,FOXC1,GDF15,GOT1,HAS2,HOXA11,HSPA1A/HSPA1B,ICAM1,Ifi47,IGFBP3,IL1RN,IL6,KCNAB2,KCNF1,KITLG,KSR2,L1CAM,MAL,Meis1,MKRN3,NR1H4,OSGIN1,PBX3,PPARG,RND3,RORC,SFN,THBS2,Tmsb4x (includes others),TNF	610 (11)
EOMES		transcription regulator		-0.793		2.93e-05	ACTA2,ALCAM,CAP2,CCK,FOXC1,FZD8,HOXA10,HOXA13,IGFBP3,Klra7 (includes others),MAP2K6,MMP17,NAV2,NRP2,PDPN,PITX1,PLXNA4,PMP22,PRDM1,RND3,ROBO2,SATB2,SOX2,TFPI2,TNFSF10,ZNF521
IHH		enzyme		0.406		3.04e-05	ALPL,CCND1,CHST11,COL10A1,COL11A1,COL27A1,DLX1,EDIL3,ENO1,FGFR2,FZD1,HHIP,IL6,MRC1,Perm1,POSTN,Psg18 (includes others),PTGFR,PTH1R,PTHLH,TNF,TNFRSF11B,Zfp185	41 (3)
dimethylnitrosamine		chemical toxicant	Activated	2.23	bias	3.07e-05	ACTA2,BMP3,CDH1,COL1A1,COL1A2,Cxcl9,DES,ICAM1,IGFBP5,IL6,NQO1,PRKCH,PRKCZ,TNF,VIM	817 (19)
TFRC	0.786	transporter		0.349	bias	3.18e-05	ACTA2,ANKRD22,ATF5,ATF6,BBC3,CHAC1,COL1A1,DDIT3,FOS,GGT1,GPX3,GPX7,ME1,Pmaip1,PPARG,PPP1R15A,PTN,SERPINB8,SOX11,SPRR1A,TNFSF10,TP53	278 (7)
cholesterol		chemical - endogenous mammalian		0.517		3.2e-05	ACTA2,AREG,CAV1,CNN1,COL1A1,CTSK,CYP3A5,CYP7B1,DDIT3,DES,EPHX1,F3,FABP5,FADS1,FDPS,GBA,GLI3,GNAI1,GRIN1,GSTA5,ICAM1,IDI1,IL1A,IL1RN,IL6,KITLG,LEPR,MAP2,ME1,Meis1,NSDHL,Orm1 (includes others),PCSK9,PPARA,PPARG,PPARGC1A,Saa3,SCD,SLC2A4,STARD4,STARD5,TIMP3,TNF,VCAM1	684 (21)
miR-335-3p (miRNAs w/seed UUUUCAU)		mature microRNA		-0.302	bias	3.22e-05	ADAMTS14,COL1A1,COL1A2,COL4A5,COL5A1,COL5A2,LOXL4,NID1,PDGFB,PLOD2,VCAN
DDIT3	-2.465	transcription regulator		-0.991		3.32e-05	ANKRD1,ASNS,ATF5,ATF7IP2,BBC3,CA6,CCDC80,CEBPA,DDIT3,DDR2,GPC6,IL6,KRT6B,LCN2,LOX,MTHFD2,NPAS2,PCK2,PDPN,PPARG,PPARGC1A,PPP1R15A,SOX2,THBS2,TNFRSF10A,TRIB3,TSC22D3,VIM	787 (18)
tacrolimus		chemical drug		0.386		3.39e-05	ANGPT1,AREG,ATP2B4,BASP1,CCND1,CEBPA,CHN2,CISH,COL10A1,COL1A1,CXADR,DAB2IP,DOCK9,DPYSL3,FKBP5,FOS,Gm3383 (includes others),IGFBP4,IKZF2,IL33,ITGAE,ITGB7,MARCKSL1,MYO1E,NEB,NFATC1,NOS1,Nppb,NT5E,OCLN,ODC1,PDCD4,PDE3B,PROM1,PTPRF,SDC3,TGFBR3,TIAM1,TIGIT,TMEFF1,TNC,TNF,TNFSF10,TRPM6,WNT7A	835 (25)
let-7a-5p (and other miRNAs w/seed GAGGUAG)		mature microRNA		-1.186	bias	3.51e-05	ACTA2,ADAMTS14,AGO4,BDNF,CCND1,CDKN2A,CEBPA,COL1A1,COL1A2,COL24A1,COL27A1,COL4A5,COL5A1,COL5A2,DOCK5,DSP,FADS2,Hmga2,IGF2BP1,IGF2BP2,IL6,KRT19,LOXL4,NID1,NQO1,PDGFB,PLOD2,PRDM1,S100A4,SCD,SLC1A4,TAF9B,TAGLN,TGFBR3,TNF,UGT8,VCAN,VIM	568 (12)
ARHGAP31	-0.117	other		-1.798		3.51e-05	BMP2,CCN2,CDH1,CDKN2A,COL5A1,Crb3,GDF15,ITGB6,MMP3,OCLN,PKP1,TGFBR3	375 (10)
ROCK		group		0.977		3.53e-05	ACTA2,BMP2,CCN2,CCND1,CDH1,CNN1,COL1A1,DES,F3,FOS,ICAM1,NGFR,PPARG,SORT1,TAGLN,VCAM1	586 (20)
nitrofen		chemical toxicant		-1.796	bias	3.53e-05	AQP1,AQP4,ENO1,EPAS1,FGFR2,FOXQ1,KCNC3,KCNJ15,SCNN1A,TGFB1I1,TGFBR3,TIMP2,TIMP3
ERBB4		kinase		-0.297		3.83e-05	ACTA2,BDNF,BTG2,CCN5,CCND1,CDH1,COL5A2,DDIT3,FBLN2,GJA1,GZMH,IGFBP4,IGFBP5,NID1,PGR,SFRP1,SLC1A1,TIMP3,Tmsb4x (includes others),TNC,TP53,WNT7A	766 (19)
IDH1	2.468	enzyme	Activated	2.236		3.85e-05	BCAT1,CDH1,CLDN3,CLDN7,COL10A1,CREB3L1,DDIT3,EPAS1,G6PC3,MYLIP,PPARG,PPP1R15A,RAB25,SLC2A4,TNF,TP53,VIM	690 (19)
phenylbutazone		chemical drug		-0.303	bias	3.85e-05	A2M,A3GALT2,ADAMTS1,ASNS,CAPN6,CCND1,CDCP1,CLDN4,CP,GPX2,LAMC2,LCN2,MRC1,PLA1A,Pvr,SLC34A2,VIM	464 (10)
Pkc(s)		group	Activated	3.232		4e-05	ACTA2,APLN,AQP3,ATF6,BCL11B,BDNF,CCN2,CLDN1,CNN1,COL1A1,DDIT3,DES,F3,FGFBP1,Flg,FOS,FOSL1,GRHL3,HPGD,IL6,IRF6,KRT8,LORICRIN,NOS1,NOX4,Nppb,NQO1,OVOL1,PPARA,PPARG,PPP1R15A,PSCA,PTPRN,RB1,S100A1,SLC6A4,TAGLN,TGM1,TNF,TP73,VCAM1	697 (19)
INSR	0.888	kinase		0.753		4.02e-05	ACOT2,ALDH2,ALPL,ANKRD1,Anp32a,AQP1,AREG,ARL4A,ATP1B1,CA6,CBR1,CCN2,CCND1,CEBPA,CHRD,CKMT1A/CKMT1B,COX6A2,CRABP2,CYP1B1,DDR2,DES,DGAT2,DLX1,DNMT3B,DPPA4,FBLN1,FDPS,FHL1,FLNC,FOS,GAS1,HHEX,HOXB2,HOXB9,HPGD,IDH1,IDI1,Ifi202b,IKZF2,IL6,ISL1,KCNJ15,LAT2,LEPR,LGALS1,LPIN3,LTC4S,MARCKSL1,MDM2,MMP11,MVD,MYCL,NDUFA4,Nppb,NSDHL,OGN,PDCD4,PDGFB,PDX1,PNPLA2,PPARA,PPARG,PPARGC1A,PRDM1,PRKD1,PTPRN,SAT1,SCD,SE…	806 (22)
LTBR	0.424	transmembrane receptor		-1.283	bias	4.03e-05	ACTA2,CNN1,DSC3,DSG2,ENPP2,FAAH,GDA,ICAM1,IL6,Klra7 (includes others),PDPN,PLXNB1,TNF,TNFSF13B,VCAM1	563 (13)
TWIST2	-1.148	transcription regulator		-0.316		4.03e-05	BCL11A,BIN1,CCND1,CDH1,DDIT3,FBLN5,HOXB9,OSGIN1,POSTN,PPARGC1A,PRKAA2,RNF43,SOX2,TNF,VIM	697 (17)
HNRNPK	0.02	other		0.854		4.03e-05	ALOX15,AR,CAVIN2,CCK,CCN2,COL12A1,IGSF10,IL2RG,MMP3,PDLIM2,PPARG,RB1,SOX2,Tmsb4x (includes others),VCAN	277 (7)
SGK1	-0.864	kinase		0.502	bias	4.04e-05	ASIC1,CCN2,CEBPA,HOXA10,IL6,KCNA4,KCNQ5,PPARG,SCNN1A,SCNN1B,SLC15A2,SLC1A1,SLC1A5,SLC1A7,SLC2A4,SLC34A2,SLC5A1,TNF	694 (23)
triamterene		chemical drug		-0.725	bias	4.04e-05	A2M,A3GALT2,ADAMTS1,ASNS,CAPN6,CDCP1,CLDN4,CP,ELF3,EMP3,GPX2,LAMC2,LCN2,MRC1,PLA1A,Pvr,SLC34A2,VIM
SIX5	0.376	transcription regulator		1.105	bias	4.05e-05	DMPK,FZD8,IGFBP5,KRT18,MDFI,PTN,SFRP2,SIX4,ST14,WNT4
FABP1		transporter		1.938		4.05e-05	ACTA2,COL1A1,FAAH,FGF19,GOT1,NR1H4,PNPLA2,PPARA,PPARG,SLC27A1	606 (19)
clopidogrel		chemical drug	Inhibited	-3.016		4.11e-05	ACKR3,AGRN,ASNS,ATOH8,CHAC1,COL1A1,COL5A1,DDIT3,DHRS3,EDN2,F3,IFIT1,INAVA,LGR6,LYPD3,PCK2,PPP1R15A,SLC1A4,TRIB3
25-hydroxycholesterol		chemical reagent		-0.993		4.11e-05	ACAT2,ASNS,CH25H,CHAC1,DDIT3,FAM189B,FDPS,FOS,FOSL1,FOSL2,GPX3,IL6,ODC1,PIK3R3,SCD,STARD4,TNF,TRIB3,VLDLR	512 (21)
EDN1	0.758	cytokine		1.856	bias	4.28e-05	ACTA2,ADAM12,APLN,AREG,ATF6,CCN2,CCND1,CDH1,COL1A2,COL5A1,EDNRB,ENAH,FOS,FOSL1,GJA1,HCN2,ICAM1,IL6,LEPR,MARCKSL1,MMP3,MMP7,MSN,Nppb,ODC1,PLAUR,PLCB4,PPARA,PTGER4,RAMP3,SERPINB2,SLC8A1,SOX5,TIMP3,TNC,TP53,VCAM1,VCAN,VIM	546 (15)
TXNRD1	-0.166	enzyme	Inhibited	-2.054		4.49e-05	ACOX2,AOX1,CBR1,CBR3,GPX2,GPX3,Gsta4,GSTA5,GSTM5,ME1,NQO1,SCD,TNFRSF10A,TP53	539 (12)
IGFBP2	3.892	other		0.899	bias	4.53e-05	CCND1,CDH1,COL11A1,COL14A1,DDAH1,ENPP5,ESR1,GDF15,IGFBP2,IGFBP3,IGFBP4,NUP210,POSTN,PTN,RBMS3,THBS2	704 (21)
salicylic acid		chemical drug		-1.974		4.53e-05	ARC,BDNF,BGN,CCN2,CEBPA,DDIT3,F3,FKBP5,GDF15,IL1A,IL6,KITLG,SLC2A4,TNF,TNFSF10,VCAM1	777 (18)
deferoxamine		chemical drug		0.178		4.62e-05	ANKRD22,APLN,BDNF,CACNA1G,CCND1,CDH1,CDKN2A,CP,CYP3A5,DDIT3,EGLN3,ENO1,EPAS1,F3,FOS,GDF15,HSPA1A/HSPA1B,ICAM1,IGFBP2,IGFBP3,IGFBP4,IGFBP5,IL6,ITGB7,JAG2,LCN2,MDM2,ME1,NFATC2,PLA2G3,PLA2G4A,PLAUR,PPARG,PROM1,RB1,SERPINB8,TNFSF10,TP53,TSC22D1,VCAM1	747 (20)
Smad2/3-Smad4		complex		1.914	bias	4.73e-05	ACTA2,AREG,CCN2,CDH1,CDKN2B,COL1A1,COL1A2,IGFBP3,IGFBP5,NOX4,VIM	190 (7)
HOXD3	-0.243	transcription regulator		-0.588		4.75e-05	CDKN2A,COL1A1,DSG1,DSP,HOXD10,IGFBP3,JUP,TAGLN,TSPAN7
BRD4		kinase	Activated	3.612	bias	4.77e-05	ACSM3,ACTA2,BDH1,CCND1,CDKN2B,CEBPA,COL1A1,COL1A2,COL5A1,DDIT3,DERL3,FADS1,FBN1,FKBP11,FOS,FOSL2,ICAM1,IL6,JARID2,KCNQ5,LOX,LOXL1,MAL,NQO1,PDGFB,PRDM1,PTPN22,SLC16A9,SLC7A2,THBS2,WNT5A	766 (22)
BRAF	0.546	kinase		1.948		4.78e-05	ADGRL3,ATF5,ATF6,B4GALT5,CCND1,CDH1,CDKN2A,CELSR2,DDIT3,DNMT3B,DSE,EPAS1,EPCAM,ERBB3,F3,GALNT11,GALNT18,GALNT3,GCNT4,ICAM1,IL1A,IL6,LAMB3,LAMC2,MGAT4A,MSLN,NGFR,NT5E,NUP210,PTPRF,RND3,SLC6A14,ST6GALNAC2,TACSTD2,TNFRSF10A,TSC22D1,TSPAN1,TTYH3,UGT8	654 (18)
CDH1	6.094	other		0.159		4.82e-05	CCND1,CDH1,CDH3,ERBB3,FOSL1,IGFBP3,JUP,KRT13,KRT15,KRT18,KRT19,KRT7,LCN2,MMP3,NCAM1,OCLN,PIK3R1,PLAUR,S100A4,TNF,VIM	806 (17)
thalidomide		chemical drug		-1.186	bias	4.83e-05	ANGPT1,CAV1,COL1A1,FOS,GDF15,ICAM1,IL6,KCNMA1,NRP2,PDGFB,PLAUR,TNF,TRAF1	654 (18)
GAS2L3	-0.224	other		1.414	bias	4.97e-05	BTG2,EPHX1,PVT1,SAT1,SLC19A2,TM4SF1,TP53,ZMAT3
captopril		chemical drug		-1.049		4.98e-05	A2M,ASNS,BGN,CAPN6,CP,CSRP2,F3,GPX2,IGFBP6,IL1RN,IL6,LAMC2,LCN2,MRC1,MYO6,POSTN,SERPING1,SLC34A2,SLC8A1,THBS4	685 (18)
HAND2		transcription regulator		1.128		5.02e-05	ACE2,ADSS1,CCBE1,CLSTN2,COL1A1,COL1A2,CXCL6,DES,GJA1,GLI3,GREM1,HOXD11,IL6,MSX1,MYL7,NFATC2,Nppb,S100A4
bexarotene		chemical drug		0.758		5.07e-05	AKR1C3,ALCAM,ASNS,AXL,BCL11B,BMP6,CCK,CCND1,DEPP1,DHRS3,EHHADH,Gsta4,ICAM1,IGFBP6,ISL1,ITGB6,KRT15,KRT17,LRP4,Meis1,Mt3,MTHFD2,NGFR,NOS1,NRP2,ODC1,PCSK9,PIK3R1,PLAUR,PLOD2,PPARG,SCD,SLC27A1,TM4SF1,TSC22D3,TUBB3,VCAM1	760 (21)
DUSP1	1.223	phosphatase		-1.023		5.45e-05	BMP2,CCN5,CH25H,CTSK,FOSL1,GDF15,GJB2,ICAM1,IFIT1,Ifitm6,IL1A,IL1RN,IL23R,IL6,ISG15,LTF,LUM,MRC1,Mx1,MXD1,PAQR7,PDGFB,PIK3R1,PLAUR,PRDM1,SERPINB2,THBD,TNF,UBD,VCAM1,VNN1	678 (12)
FA2H	3.068	enzyme		-0.105		5.45e-05	CCN2,CDH1,EPGN,SCD,SLC2A4,VIM	354 (7)
SNHG7		other	Inhibited	-2.421		5.45e-05	CDH1,CDKN2A,CDKN2B,FAIM2,GALNT1,VIM
GDF2		growth factor		1.05	bias	5.49e-05	CAV1,CDH11,Cdkn1c,COL1A1,CRYAB,EMB,ENPP2,FMOD,FOS,HTRA1,ICAM1,LORICRIN,MDFI,MSX1,NGFR,POSTN,RAMP1,SEMA3B,SERPINF1,SMAD6,TUBB3,VCAM1	350 (12)
IL33	6.894	cytokine	Activated	2.434		5.5e-05	ADAMTS1,ADORA2B,ALDH1A3,ALDH3A1,Alox12e,AREG,ARG1,ARHGAP30,AXL,CCND1,CHST11,CISH,DGAT2,EGLN3,EPAS1,FA2H,FBXL21P,FER1L6,FOSL2,GATA3,GCHFR,GSTM5,ICAM1,Ifitm1,IL17RB,IL1A,IL1RN,IL2RG,IL6,LEPR,LGALS1,Marcks,NFATC1,NT5E,ODC1,P2RY1,PAPSS2,PDGFB,PLA2G4F,PPARG,PPFIA3,PRDM1,PTGER4,RAMP1,RAMP3,RBPJ,REL,RPS6KA2,SERPINB1,SERPINB2,SMAD6,STX11,TACR1,TIGIT,TNF,TNFSF10,TPH1,TRAF1,TRAF3	642 (15)
ADCYAP1		other		1.963		5.58e-05	ANGPT1,ARHGDIG,BDNF,BMP6,BTG2,CCBE1,Cdkn1c,CNTNAP4,COL5A1,COL5A2,DCDC2,EDIL3,EMB,ENPP2,FGFR2,Fndc1,FOS,GAS1,GATA3,GCLM,GREB1,GREM2,IL6,KCNN4,KRT8,LUM,MEST,MREG,NFATC2,NOS1,NPY1R,NQO1,NSDHL,POSTN,Psg18 (includes others),PTPRR,SERPINB1,SERPINF1,SNAP25,TNF,TSC22D1,TTYH1,UGT1A6	872 (22)
tamoxifen		chemical drug		0.163		5.59e-05	ACKR3,ACOX2,AQP1,BDNF,BMP2,C3,CAV1,CCDC80,CCND1,CDH1,CDH11,CLIC3,COL11A1,COL1A1,COL1A2,CYP3A5,DEPP1,DNMT3B,EPHX1,ERBB3,ESR1,ESR2,FADS1,FADS2,FOS,GDF15,GJB2,GREB1,GSTA5,HAS2,HES1,IGFBP3,IGFBP4,IL1RN,IL6,LOXL3,MDM2,NOS1,PGR,PPARA,PPARG,RAMP3,RB1,SAMD11,SCD,SDC3,SEMA3B,SLC1A1,SLC7A2,SSTR2,SYT6,TAGLN,TNF,TP53	756 (20)
SHH		peptidase		-0.612		5.69e-05	ADAMTS1,AMD1,ANGPT1,AQP5,ATF5,BMP2,BMPR1B,CAV1,CCND1,CDH1,COL10A1,EBF1,FGF19,FOXA1,HHIP,HOXA13,HOXD11,HOXD13,IGFBP5,IL6,MSX1,OCLN,OTX1,PAX5,PDX1,PGF,PMP22,PPARG,PTHLH,SFRP1,SFRP2,SLC29A1,SOSTDC1,THBD,TSC22D3,TUBB3,WNT5A	732 (23)
FOXO1	-0.222	transcription regulator		1.994		5.73e-05	A2M,AFF3,ANGPT1,APLN,AR,CASP14,CAV1,CCN2,CCND1,Cdkn1c,CDKN2A,CDKN2B,CH25H,COL1A1,CTSE,CTSK,CYP7B1,Dnm3os,EBF1,EDNRB,FABP5,FBXO32,FDPS,FMOD,FOS,FOXC1,GPX3,HAL,ICAM1,IGFBP7,IKZF2,IL23R,IL6,ITGB6,MB,ME1,MMP3,MVD,NDUFA4,NFATC1,NR1H4,NRP2,OVOL1,PAX5,PCK2,PDX1,PNPLA2,PPARG,PPARGC1A,PPP1R15A,PRDM1,Prg4,PRKAA2,SCD,SERPINB1,SERPINB2,SERPINB5,SESN3,SFN,SLC25A30,SLC25A37,SLC2A4,SOX2,SOX4,SOX5,Tcf7,TNF,TNFSF…	737 (19)
BIRC5	-0.23	other		1.194		5.77e-05	BGN,CCN2,COL1A1,COL5A2,DPT,FBLN1,FBN1,FMOD,IL2RG,JCHAIN,LUM,MDM2,TP53,TP63,TP73,VIM	764 (19)
beta-carotene		chemical - endogenous mammalian	Inhibited	-2.048	bias	5.93e-05	Aldh1a7,DGAT2,FADS3,GJA1,HSPA1A/HSPA1B,IL1A,IL6,ME1,Orm1 (includes others),PPARG,SLC2A4,SLC9A2,THBD,TNF	730 (18)
homocysteine		chemical - endogenous mammalian		-0.775		6.04e-05	AKR1C3,ALOX15,ASNS,ATF6,CCND1,DDIT3,DES,EDN2,F3,FA2H,FADS1,FADS2,FDPS,FOSL2,GGT1,IDI1,IL6,PGF,Pmaip1,PPP1R15A,Saa3,SCD,TP53,TRIB3,VCAM1	623 (19)
TERT	0.63	enzyme		-0.766		6.17e-05	ALDH1A3,AR,ASNS,CAV1,CCN2,CCND1,CDKN2A,COL5A2,EIF5A2,FAM167A,HTRA1,ICAM1,IFIT1,IGFBP4,IL13RA1,IL6,IQGAP2,ISG15,JUP,KRT19,MMP3,PLOD2,PROM1,PSCA,RB1,SERPINB2,TBX3,TNF,TP53,VIM	774 (22)
HGF	1.406	growth factor		-0.263	bias	6.32e-05	A2M,ACKR3,ACTA2,ADAMTS1,ADGRL2,ANGPTL2,ASNS,BMP2,BNC1,CAV1,CCN2,CCND1,CDH1,CDKN2A,CDKN2B,CELSR1,COL1A1,COL1A2,CRLF1,CRYAB,CTSK,DDIT3,DES,DSG1,EHF,ELF3,EPCAM,F3,FAIM2,FKBP5,FOS,FOSL1,FOXA1,GBA,HES1,ICAM1,IGFBP3,IGFBP4,IL6,ISG15,KITLG,KRT17,KRT18,KRT19,L1CAM,LAMC2,LCN2,MDM2,NFATC1,OCLN,PGF,PLAUR,PMP22,PTHLH,PTPRF,PTPRR,RARRES2,RGS20,SERPINB2,SFRP1,SIX4,SLC19A2,SOX2,ST14,STK10,TACR1,TACSTD2,TBC1D8,T…	756 (15)
simvastatin		chemical drug		0.317		6.37e-05	ACTA2,ADAMTS1,Anp32a,AR,BMP2,CACNA1G,CCN2,CCND1,CDH1,COL10A1,COTL1,DDAH1,ESR1,F3,FADS1,FADS2,FOS,GJA1,HS3ST1,ICAM1,IGFBP3,IL6,LCN2,MMP3,NFATC1,PCSK9,PGLYRP1,PPARA,RHOU,RORC,SLC2A4,ST6GALNAC4,THBD,TNF,TNFRSF11B,TSC22D3,UNC13A,VCAM1,VIM,Xlr3c (includes others)	694 (20)
NGF	-0.901	growth factor		0.467		6.47e-05	A2M,ADGRL2,AGRN,ASIC1,BAMBI,BBC3,BDNF,BTG2,CAV1,CCND1,CDH1,CDKN2A,CRYAB,E2F2,EGLN3,EPAS1,FOS,FOSL1,FOSL2,GRIN1,LIFR,MAP2,MMD,MMP3,NGFR,NOS1,PLA2G4A,PLAUR,PPARG,PPP2R2C,Pvr,SH3RF1,SLC41A2,SNAP25,SORT1,TACR1,TNF,TP73,TRPA1,VGF,WNT4,WNT5A	672 (18)
ATP		chemical - endogenous mammalian		1.023		6.64e-05	ACTA2,ARG1,BDNF,CAPN2,CCND1,CDH1,CLDN1,F3,FOS,FZD8,GCLM,ICAM1,IL1RN,IL33,IL6,LCN2,MMP3,NFATC1,NOS1,PADI4,PYCARD,SAT1,SPHK1,TNF,TP53,TUBB3,VCAM1	765 (22)
SIRT1	0.304	transcription regulator	Inhibited	-3.225		6.84e-05	ACAP1,ADAMTS5,APLN,ARG1,BBC3,BDNF,CA12,CAV1,CCND1,CDH1,CDKN2A,CDKN2B,COL10A1,CRYBG2,Csprs (includes others),DDIT3,EPAS1,EPDR1,ESR1,EVPL,FBXO32,GRIP1,GSTA5,GSTM5,HLA-A,ICAM1,Ifi47,IL2RG,IL6,JCHAIN,KALRN,KIF1A,KIF5C,MMP3,NECTIN4,NEURL1,NMRK1,NPNT,NR1H4,NT5E,OAS2,PC,PCK2,Pmaip1,PPARGC1A,PRDM16,PRKCI,PRSS27,PTN,RIMS2,RNF39,SCNN1A,Sectm1b,SFRP2,SLC29A1,SLC43A3,TACSTD2,TBC1D8,TFPI,Tgtp1/Tgtp2,THBD,TIMP…	592 (19)
VHL	-0.221	transcription regulator	Inhibited	-2.157		6.97e-05	BBC3,CA12,CAV1,CCN2,CCND1,CDCP1,CDH1,CLDN4,CNN1,DUOX2,EGLN3,EPAS1,F3,GAL3ST1,GLCE,LOX,NOX4,NREP,PDGFB,PTHLH,SLC16A3,TAGLN,TNF,TNFSF10,TP53,TRAF1,VCAM1,VIM,ZFP36L1	809 (22)
NR3C2	-1.227	ligand-dependent nuclear receptor		1.554		7.04e-05	ADAMTS1,AQP4,ARG1,ATP1B1,CCN2,COL1A1,CXCL6,CYP1B1,DES,FKBP5,GPX3,Gsta4,ICAM1,IL6,LCN2,MAP2,NDRG2,NOX4,Nppb,NRIP3,PGF,PTGDS,SCNN1A,SPHK1,TNF,TP53,TSC22D3,TUBB3,VCAM1,VLDLR	571 (19)
miR-30c-5p (and other miRNAs w/seed GUAAACA)		mature microRNA		-1.592	bias	7.06e-05	ADAMTS14,BDNF,CCN2,CDCP1,COL1A1,COL1A2,COL4A5,COL5A1,COL5A2,CPNE8,GALNT1,HES1,HEYL,IDH1,IL6,KRT7,LOXL4,NID1,Nppb,NT5E,P4HA2,PDGFB,PLOD2,PPARG,RPS6KA2,SLC12A4,TNF,TP53,TP63,VCAN,WNT5A	455 (7)
estradiol benzoate		chemical drug		1.209		7.29e-05	AR,AVPR1A,BDNF,C3,CCK,CCN5,CDH1,ESR1,ESR2,FOS,GJA1,GRIN1,LEPR,NPY1R,NQO1,PAQR8,PGR,PTGER4,SLC2A4,STK39	656 (19)
SERPINF1	5.646	other		1.405		7.31e-05	ACTA2,BDNF,CCN2,CCND1,CD34,CEBPA,CRYAB,CSPG4,LOXL1,OCLN,PPARG,PPARGC1A,SERPINF1,TNFRSF11B,TNFSF10,VIM	673 (18)
Collagen type I (complex)		complex		-0.117		7.66e-05	ACTA2,CCND1,CDH1,CDKN2A,COL1A1,EXOC3L2,IL6,MMP3,PGR,PLOD2,PRRX1,PRRX2,RECK,TIMP2,TNC,TNF,TP53,VIM	691 (23)
fenamic acid		chemical reagent		-0.42	bias	7.66e-05	A2M,A3GALT2,ADAMTS1,ASNS,CAPN6,CDCP1,CLDN4,CP,ELF3,EMP3,GPX2,LAMC2,LCN2,MRC1,PLA1A,Pvr,SLC34A2,VIM
KMT2A	0.324	transcription regulator	Activated	2.521	bias	7.76e-05	ABTB2,CDKN2A,DEPTOR,EML5,EPHB3,EYA1,FOXC1,GCNT4,HOXA10,HOXA11,HOXA13,IGFBP4,LRRC55,MECOM,Meis1,MEIS2,PGR,PIGZ,PRDM16,PRDM8,PROM1,SATB2	550 (8)
ATN1	-0.178	transcription regulator				7.85e-05	ATP1A3,ATP1B1,BASP1,BDNF,BMP3,BTG3,Cd24a,CDH11,DPYSL3,EBF1,Fxyd2,IGFBP5,JUP,KCNAB2,KCNC3,Marcks,MARCKSL1,NREP,PRKCG,PTPN22,PTPRF,SOX11,SOX4,SPTBN2,TIAM1,TM4SF1,Tmsb4x (includes others),VSNL1
EGLN		group		-1.9	bias	7.95e-05	A2M,AK4,ALDOC,APLN,BCL11B,CCN5,CNFN,CSN3,CSRP2,DMKN,EFNA3,EGLN3,ERFE,FOSL2,GATA3,GPR146,GREM2,HOXA13,LCN2,Orm1 (includes others),PDGFRL,PPP1R3E,PPP2R5B,RIPPLY3,RNF122,RNF165,SELENBP1,Serpina3g (includes others),SLC16A3,SLC27A1,SMTNL2,VLDLR
L-triiodothyronine		chemical - endogenous mammalian	Activated	2.302		8.17e-05	A2M,ACOT2,ACTG2,ADAMTS5,AKR1C3,AMD1,AR,ARSA,ATP1A3,ATP1B1,BBC3,BDNF,C1S,CBR1,Cbr2,CCN2,CCND1,CDKN2A,CDKN2B,CEBPA,CEP126,CXCL14,DAB2IP,DNMT3B,ECE1,EHHADH,ENPP2,EPAS1,ESR1,F3,FLYWCH2,FOS,GDF15,Gm3383 (includes others),HCN2,HLF,IGFBP3,IGFBP4,IGFBP6,IL6,INHA,ITGA7,KCNK1,KRT16,KRT17,LCN2,ME1,MVD,MYOM3,NID1,Nppb,NT5E,NTNG1,ODC1,PCK2,PDX1,PGR,PITX1,Pmaip1,PPARA,PPARG,PPARGC1A,PRDM16,PRKCZ,PTGDS,PTH1R,RB…	684 (17)
N,N-dimethylsphingosine		chemical reagent		-1.026	bias	8.25e-05	FOS,ICAM1,IL6,NFATC1,SPHK1,TNF,VCAM1	690 (21)
MYOC	0.329	other				8.3e-05	ADAMTS1,CARD10,CDH11,CLDN7,DDIT3,ESRP1,FBN1,FBXO32,FSCN1,HHIP,IGFBP5,MFAP2,MPZ,PGR,PLXNC1,PRSS3,PTGER4,RGS17,SFRP1,SOSTDC1,SOX11	598 (10)
triclosan		chemical drug	Activated	2.828	bias	8.59e-05	ACTA2,AREG,COL1A1,FOS,GSTA5,IL6,NQO1,TNF	934 (20)
LRP6	-0.007	transmembrane receptor		-0.746		8.66e-05	ACTA2,CAV1,CCND1,EPCAM,FOS,GATA3,IL6,KRT18,LEPR,MMP3,MMP7,PPARGC1A,TNF,TTYH1,VIM	854 (24)
Tcf7	3.9	transcription regulator		-0.275		8.7e-05	Akr1c12/Akr1c13,BCL11B,CERK,CHDH,CISH,EPHX1,FAAH,FDPS,GATA3,GGT1,GPA33,IL23R,IL34,Klra7 (includes others),LRIG1,LYSMD2,MAPK12,MVD,MXD1,Naip1 (includes others),PAPSS2,PLAG1,PLCB4,PPARG,PRDM1,Prg4,REL,RORC,SH3GL3,SH3RF1,SOX12,SOX13,STX11,TANC2,TIAM1,TIGIT,TNF,TNFRSF19,TSC22D1,ZNF467	528 (7)
IGF2		growth factor		0.151		8.84e-05	Anp32a,AREG,ARL4A,BMP2,CCN2,CCND1,Cdkn1c,CYP1B1,DDIT3,DLX1,GAS1,IDH1,Ifi202b,IGFBP2,IGFBP3,IGFBP4,IGFBP5,IGFBP6,IL6,Mcpt8,MDM2,MMP11,MMP3,Nppb,OGN,PDCD4,PDGFB,PIK3R1,PRDM16,SAT1,SLC2A4,THBS2,TP53	752 (23)
bisphenol A		chemical - endogenous mammalian		1.73		8.85e-05	ALDH5A1,AQP5,AR,C3,CCN2,CCND1,CDH1,COL1A1,COL1A2,COL5A1,ESR1,ESR2,FOS,GAD2,GK5,HOXA10,HSPA1A/HSPA1B,ICAM5,LCN2,Mcpt1,MMP11,OCLN,PGR,POSTN,PPARG,RBM47,RBPMS,SLC1A5,SLC2A4,SLC6A14,SLC6A4,SMOC1,SOX2,TIMP3,TNC,TP53,VCAN	934 (22)
ARHGEF2	-0.44	other		0	bias	8.93e-05	CCND1,IL6,TNF,VCAM1	582 (18)
Mapk		group		1.204	bias	9.06e-05	ADA,ADAM12,APLN,ARC,BDNF,CCND1,CLDN4,COL1A1,ESR1,F3,FOS,GJA1,HPGD,IL6,ITGB7,MMP3,MMP7,NOS1,PIGR,PRKCZ,TNF,TUBB3,UGT1A1,VCAM1	613 (19)
rosiglitazone		chemical drug		0.197		9.06e-05	ADA,ADAMTS1,AOC3,AQP3,ARG1,BDNF,C3,CAV1,CCN2,CCN5,CCND1,CD1D,CDH1,Cdkn1c,CEBPA,COL1A1,COL1A2,Cxcl9,DGAT2,DHRS3,DOK1,EGLN3,EHHADH,F3,FABP5,FOS,FOSL1,GATA3,GOT1,GPA33,HAS2,HPGD,ICAM1,IDH1,IGFBP2,IGFBP5,IGFBP6,IL1A,IL1RN,IL6,KRT18,LAMB3,LCN2,LOX,LTB4R,Muc1,NOX4,Nppb,OAS2,PC,PDX1,PIK3R1,PLCL1,PNPLA2,POSTN,PPARA,PPARG,PPARGC1A,PPP2R1B,PRDM16,RARRES2,RORA,Saa3,SCD,Serpina3g (includes others),SERPINF1,S…	754 (20)
Trp53cor1	-0.508	other		0.784	bias	9.13e-05	BBC3,BNC1,IL6,MDM2,NTN1,PERP,Pmaip1,Pou3f1,SSTR2,WNT3A	760 (19)
KN-62		chemical drug		0.392	bias	9.13e-05	AQP5,CCND1,CYP3A5,DDIT3,GRIN1,IL6,PPARG,PPP1R15A,TNF,VCAM1	663 (20)
tert-butyl-hydroquinone		chemical reagent	Activated	2.932	bias	9.19e-05	DDAH1,FLRT2,FOS,FOSL1,FOSL2,FOXC1,GCLM,GPX2,Gsta4,GSTA5,GSTM5,ICAM1,ME1,NQO1,OSGIN1,PALLD,PPARG,SLC1A1,TNF,UGT1A1,WNT5A,ZNF184	780 (20)
STING1		other	Activated	3.101	bias	9.38e-05	ARG1,BBC3,CGAS,Cxcl9,DDIT3,HAP1,HOPX,IFIT1,IL1A,IL33,IL6,ISG15,LCN2,Mx1,PPP1R15A,Serpina3g (includes others),TNF,TP53	465 (11)
gentamicin C		chemical drug		-0.728	bias	9.41e-05	A2M,A3GALT2,ADAMTS1,ASNS,CAPN6,CLDN4,CP,ELF3,EMP3,GPX2,LAMC2,LCN2,MRC1,PLA1A,Pvr,SLC34A2,VIM
Focal adhesion kinase		group		0.751		9.64e-05	DSP,ICAM1,IL6,KRT14,KRT18,KRT8,PALLD,PRRX1,TAGLN,TP53,VCAM1	629 (20)
THRB	2.498	ligand-dependent nuclear receptor		1.98		9.83e-05	AMPD3,ATP1A3,BCL2L14,BTG2,CCND1,CEBPA,Cxcl11,EHHADH,ERBB3,FDPS,FOS,FOSL1,FOXN1,FRAT1,FSTL1,FZD1,FZD8,IGFBP2,IGFBP3,IL6,KCNMA1,MACC1,ME1,MMP7,Nppb,NUDT7,OR5V1,PPARG,PROM1,PTGDS,SFRP1,SFRP2,SH2D4A,SLC2A4,Sprr2g,TCEA3,Tcf7,THRB,TNF,TNFRSF10A,TNFSF10,TP53,TP63,Ugt1a7c,WIF1,WNT11,WNT4,WNT7A	627 (17)
KLF5	1.655	transcription regulator		0.133		9.88e-05	ACTA2,ARG1,CCND1,CDH1,Crisp1/Crisp3,CXCL6,EPAS1,FGFBP1,FOXA1,HHEX,HLF,KRT5,NR1H4,PDGFB,PPARG,SORCS2,SOX2,SOX4,TAGLN,WNT10A,ZFP36L1	690 (20)
CFTR		ion channel	Inhibited	-2.508		9.88e-05	AQP1,ASNS,Cma2/Mcpt9,CYP3A5,FAAH,FADS1,FADS2,FDPS,GPX2,HPGD,IDI1,IL6,Mcpt1,Mcpt2,MYL7,PGLYRP1,PLA2G5,Saa3,SCD,Tmsb4x (includes others),TNF	755 (18)
obeticholic acid		chemical drug		0.005		0.000101	ACTA2,CCN2,CDH1,CEBPA,COL1A1,DDAH1,FGF19,ICAM1,IL6,NR1H4,PPARG,SMAD6,TIMP2,TNF	694 (16)
SMAD1	1.856	transcription regulator		1.387	bias	0.000101	ACTA2,ALPL,BTG2,CCN2,CDKN2B,COL10A1,COL1A1,COL1A2,HHEX,ICAM1,PDGFB,SMAD6,TBX20,VCAM1	680 (22)
HDAC6	-0.665	transcription regulator		-0.9		0.000101	ADAMTS1,AR,CDH1,COL1A1,ESR1,GDF6,ICAM1,IL6,PDGFB,TAGLN,TGFB1I1,TNF,VCAM1,VIM	762 (22)
MET	-0.734	kinase		-1.375		0.000103	AQP3,AREG,BNIPL,CAMK2B,CCND1,CDH1,CLDN1,COL5A2,Cxcl11,ESR1,FBXO32,FOS,GATA3,IL6,JAG2,MAL,MDM2,NOX4,NREP,PAPPA,PERP,PPARGC1A,SH3BP5,SLCO3A1,SOX2,SP6,TSC22D1,VIM	728 (19)
lovastatin		chemical drug		1.411		0.000104	ACAT2,ADAMTS1,AR,BDNF,CCN2,CCND1,COTL1,DDIT3,DPYSL2,FAM189B,FDPS,GATA3,GPX3,IL1A,IL6,MAL,MPZ,MVD,NOX4,PCSK9,PIK3R3,PTHLH,RARRES2,RB1,RHOU,TFPI,TNF,TNFRSF11B,TP53,Xlr3c (includes others)	778 (19)
triamcinolone acetonide		chemical drug		-1.74		0.000105	ALDH5A1,AQP1,AQP3,ARL4C,BMP2,BMP6,BTG2,CHKA,CHL1,COL13A1,CXADR,DDIT3,DGKH,DYRK3,E2F2,FGFR2,FKBP5,FOS,GAS1,IGFBP3,IGFBP4,ITGA10,MARVELD2,MDFI,MEGF9,NOS1,PALLD,PLXNC1,SCD,SEMA6A,SFRP2,SOX4,STK10,TRIB2,TSC22D3,UGT8,VLDLR,ZBTB16	507 (12)
CALCA		other		0.977		0.000109	AQP4,ARG1,CTSK,DGAT2,EGLN3,EPAS1,FA2H,FOS,FOSL2,GSTM5,ICAM1,IL17RB,IL6,LGALS1,NDRG2,ODC1,P2RY1,PALM,PLA2G4F,PPARG,PRDM1,PTGER4,RAMP1,RAMP3,RBPJ,SERPINB1,SLC2A4,SLC43A2,SORT1,ST14,TACR1,TIGIT,TNF,TPH1	788 (21)
BDNF	-3.607	growth factor		1.407		0.000109	AGRN,AR,ARC,ARVCF,ATP1A3,BDNF,BMP2,Cdkn1c,CP,CPLX2,CSPG4,DPYSL3,EPB41L2,FOS,FSCN1,GAD2,GDA,GNAI1,GPC4,GRIN1,HSPA2,IL6,KIF1A,LCN2,LGALS1,MAP1B,MVD,MYO6,NAPB,NCAM1,NGFR,NOS1,PALMD,PRKCZ,PRSS12,SEMA3E,SFRP1,SFRP2,SNAP25,SORL1,SOSTDC1,TAGLN,TBC1D8,TIAM1,TMEM45A,Tmsb4x (includes others),TNF,TNFRSF11B,TPH1,TRAF3,TRIB2,TUBB3,VGF,VIM,VSNL1	628 (19)
estrogen		chemical drug		0.415		0.00011	AR,AREG,ART3,AXL,BDNF,BMP2,CCK,CCN2,CCND1,COL14A1,COL18A1,COL1A1,COL5A1,EPAS1,ERBB3,ESR1,ESR2,FBLN1,FOS,GJA1,GJB2,GREB1,ICAM1,IGFBP2,IGFBP4,IGFBP5,IGFBP6,IL1A,IL6,KCNH1,LCN2,LGALS1,LTF,MDM2,MSX1,MVD,MYBL1,NGFR,NOS1,PGR,PTGDS,SLC6A4,SOAT2,SSTR2,Tmsb4x (includes others),TNF,TNFRSF11B,TP53,TSPAN4	834 (21)
deoxycholate		chemical - endogenous mammalian	Inhibited	-2.938		0.00011	CAV1,CCND1,CDH1,DDIT3,FGF19,GJA1,GJB2,GJB6,HPGD,IL6,PLAUR,SERPINB5,TNF,TP53,TP63	600 (16)
SP3	-0.477	transcription regulator		-0.712		0.000112	ACTA2,ALOX12,ASNS,CCND1,CEACAM1,CEBPA,COL1A1,COL1A2,CYP7B1,DNM1,ESR1,F3,FOS,FOSL1,GDF15,GRIN1,HAS2,IGFBP3,IL1A,KRT16,LCAT,LORICRIN,NOS1,NPTXR,PADI1,PADI4,PGR,PLAUR,PRKG1,RECK,Rhox5,SLC39A8,TAGLN,TGFBR3,TGM1,TIMP2,TNC,TP53,VIM	812 (18)
JAK1/2		group	Activated	2.099	bias	0.000114	BCL11B,CA12,CCK,FAM107A,FAM81A,GDA,ICAM5,Ifi47,IL6,ISG15,KCNF1,KCNG1,MYO5B,NPTXR,PLAC8,PRKCG,THPO,TNF	310 (7)
JAG1	1.343	growth factor		1.147	bias	0.000115	ACTA2,CCND1,CDKN2B,COL1A1,HES1,HEYL,IGFBP3,RNF128,SOX2,TAGLN,TIMP3,TNC,TP53,TRPA1,VIM,WNT4	667 (19)
SAA1		transporter		0.203		0.000115	ALPL,ARG1,BGN,CCND1,CEBPA,CTSK,CXCL6,IL1RN,IL6,MMP3,MRC1,PPARG,TNF	719 (14)
phenacetin		chemical drug		-0.238	bias	0.000115	A2M,A3GALT2,CAPN6,CLDN4,CP,ELF3,GPX2,LAMC2,LCN2,MRC1,PLA1A,SLC34A2,VIM
birabresib		chemical drug		-0.853		0.000116	ACKR3,ADAMTS1,BCAT1,CDKN2B,DDIT3,EPHA7,EYA2,GPR27,HS6ST2,MFNG,PDE9A,PDLIM2,PTPRF,RAB29,RBMS3,SERPINF1,VCAM1
capsaicin		chemical drug		-0.634		0.000116	AQP5,BDNF,CCND1,CYP3A5,DDIT3,FOS,GDF15,KCNA4,KITLG,PPARA,PPARG,RXRA,SCNN1A,TACR1,TNF,TNFRSF11B,WNK1	730 (20)
NS-398		chemical reagent		-0.878		0.000116	Abcb1b,ALOX15,ALPL,ANGPT1,ARG1,BMP2,BTG2,CAPN2,CCND1,CDKN2A,COL1A2,F3,ICAM1,IL1A,IL6,PCDH7,PDCD4,PPARG,RECK,SERPINB2,TFPI2,TNF,TP53	724 (21)
cis-urocanic acid		chemical drug	Activated	2.396	bias	0.000118	ADAMTS1,CLDN1,CRYAB,HSPA1A/HSPA1B,IGFBP3,IL6,KCNK1,SERPINB2,TNF	443 (7)
ITGA9	0.466	other		1.567	bias	0.000118	ACTA2,CDH1,CDH11,CXCL14,CXCL6,IL6,MMP3,TNC,VIM	626 (19)
MAPK7	-0.68	kinase	Activated	2.822	bias	0.000126	ADAMTS1,ALDOC,BDNF,CCND1,Cxcl9,FDPS,IDI1,IL1A,IL6,MVD,NQO1,NSDHL,SERPINB2,SOAT2,STARD4,THBD,TNF,TP53,TP63,VIM	739 (17)
TCF7L2	0.901	transcription regulator		0.934	bias	0.000126	ACOT4,APCDD1,APLP1,AQP3,ATP8B1,BAMBI,BIN1,CCN2,CCN5,CCND1,CDKN2A,CEBPA,CPD,DMP1,DOCK9,EFNB1,EHHADH,ENPP2,ENPP4,EPAS1,EPCAM,ERBB3,FA2H,FBXO32,FGFR2,FOS,GCLM,Gm19439,HHIP,HOXB9,HSPA2,IDH1,IGF2BP1,IGFBP2,IL12RB1,LAMC2,LGR6,MAL,MAP7,ME1,MMP7,MYO6,PARVB,PDX1,PIP4K2A,PLAUR,PLEKHG1,PPARG,PPARGC1A,PRRG1,RASGEF1B,SDC2,SH3GL3,SLC22A23,SNX18,SORBS3,SOX2,STK39,TMEM125,TP63,UGT8,VCAN,VIM	764 (21)
ELF3	4.693	transcription regulator		1.364	bias	0.000127	ANGPT1,CCL24,CLDN7,EHF,ELF3,IL6,KRT4,KRT8,MMP3,PPARG,ST6GALNAC5,TIMP3	526 (15)
PRKG1	3.047	kinase		1.686		0.000134	ACTA2,ALOX15,CCN2,CCND1,COL1A1,FOS,GKAP1,Nppb,PPARG,TAGLN,VCAM1	637 (22)
PRLR		transmembrane receptor		-0.212		0.000134	A2M,AKR1C3,BDNF,CISH,Elf5,ESR1,ESR2,IGFBP5,Serpina3g (includes others),SLC34A2,TP53	757 (18)
SOD2	0.309	enzyme		0.082		0.000136	ALOX12B,ANGPT1,ANKRD29,ASB11,COLEC12,DDIT3,GPR146,IL6,KLKB1,MAP2,MARK1,MMP3,MMP7,ODC1,PRRX1,RDH12,SHISA4,SLC19A2,SLIT1,SORT1,SOX2,TNF,TP53	690 (18)
LMNB1	0.098	other				0.000139	CCN5,CRIP1,CRYAB,FBN1,FLT3,FSTL1,GJA1,GPC4,HS6ST2,MGP,MGST1,PAPPA,PRRX2,SCD,THBS2	557 (7)
8-(4-chlorophenylthio)-guanosine-3', 5'-cyclic monophosphate		chemical reagent		0.263		0.000141	ALOX15,IL6,Nppb,PPARG,PPARGC1A,PRDM16,PRKG1,TNF	689 (20)
ARHGDIG	-3.882	other	Inhibited	-2.828	bias	0.000141	ALCAM,ANO9,COL5A2,JUP,LPAR1,PADI1,PADI3,PALLD
sertraline		chemical drug		-0.631		0.000141	BDNF,DDIT3,IL6,PDCD4,PDE4A,TNF,TP53,TPH1	660 (19)
plicamycin		chemical drug		-0.673		0.000142	AXL,B4GALT5,BBC3,CCN2,COL1A1,COL1A2,CYBRD1,DNM1,EPOP,F3,GJB2,IGFBP4,Marcks,MDM2,MST1R,MYH14,NGFR,OLFM1,PLAUR,PRDM1,PROM1,SNAP25,TP53,TP73	730 (19)
GIP		other	Activated	3.676		0.000143	CEBPA,Cxcl11,Cxcl9,FOS,Ifi47,IL1A,IL1RN,IL6,Mx1,PPARG,PPARGC1A,PRDM16,STX11,Tcf7,Tgtp1/Tgtp2,TNF	670 (23)
STAT1	1.485	transcription regulator	Activated	3.407		0.000143	A2M,ALDH1A3,ALOX15,ARG1,AXL,C1R,C1S,C3,CAND2,CCN2,CCND1,CEACAM1,CH25H,COL1A1,Cxcl11,Cxcl9,CYP3A5,DUOX2,EGLN3,FOS,GATA3,GREB1,GRIN1,HES1,HLA-E,HTRA1,ICAM1,Ifi47,IFIT1,IL1A,IL31RA,IL33,IL6,ISG15,ISL1,KRT17,LCN2,MDM2,MMP3,Mx1,NOX4,Nppb,OAS2,PDGFB,PDX1,PPARA,PPARG,PTN,RORC,RXRA,Serpina3g (includes others),SERPINB4,SERPING1,SLC8A1,SORT1,SPRR1A,Tgtp1/Tgtp2,THBS4,TNC,TNF,TNFSF10,TNFSF13B,TP53,UBD,VCAM1	683 (16)
RAC1	-0.341	enzyme		-0.297	bias	0.000147	ACTA2,ANKRD1,APBB1,CCN2,CCND1,CDH1,COL1A2,DPYSL2,ESR1,FOS,FOSL1,ICAM1,IL33,IL6,KRT14,KRT6B,Nppb,PLAUR,PRKG1,RAC3,SOX5,SOX6,VCAM1,WNT3A,WNT5A	692 (19)
3,4,5,3',4'-pentachlorobiphenyl		chemical toxicant		1.285		0.000149	ACOT2,BDNF,CAP2,CCK,COL1A1,CYP1B1,EPB41L3,ESR1,GRIN1,Gsta4,HSPA1A/HSPA1B,HSPA2,IDH1,IGFBP3,ITGA7,NQO1,PTGFR,SLCO3A1,TNC,UGT1A6	829 (21)
epicatechin		chemical drug		0.452		0.000149	CCDC184,CLCA2,COL1A1,COL1A2,COL5A1,COL5A2,DGAT2,DSE,FBN1,LGALS12,MAPK12,MFAP2,NFATC1,NID1,PODN,POSTN,PPARG,SLC5A1,SMOC1,SNAP25,TMEM102,TNF	562 (14)
EED	-0.365	transcription regulator		-1.667	bias	0.00015	BBOX1,BDNF,CDKN2A,DAB2IP,FOXA1,GATA3,Hmga2,IGFBP2,MMP7,Pou3f1,SCIN,TBX3,WIF1	580 (18)
SRSF2	0.156	transcription regulator		0.588		0.00015	CCND1,CDH1,CEBPA,COL1A1,DDIT3,HSD3B7,MST1R,NR1H4,PPARA,PPP1R15A,Tmsb4x (includes others),TNFRSF10A,VIM	499 (11)
MEG3		other		-1.902		0.000151	ACTA2,CDH1,COL1A1,GDF15,MDM2,TP53,VIM	604 (17)
SGPP1	1.879	phosphatase	Inhibited	-2.646	bias	0.000151	Flg,IL6,Krt10,LORICRIN,RPTN,SPINK5,TNF	236 (7)
ID4		transcription regulator		0.392		0.000151	BBC3,CDH1,CDKN2A,CDKN2B,CEBPA,PPARG,VIM	368 (7)
onapristone		chemical drug		-0.447		0.000151	ADAMTS1,ESR1,NPY1R,PGR,PMP22,SCNN1A,SPHK1	515 (13)
NR4A1	0.999	ligand-dependent nuclear receptor		-0.247		0.000152	ACTA2,CCN2,CCND1,CEBPA,Clca3a1/Clca3a2,COL1A1,COL1A2,CRABP2,DDIT3,EHF,EHHADH,ENO1,ENO3,EPCAM,G6PC3,GREM1,GSTM5,ICAM1,IKZF2,IL6,ITGAE,JUP,KCNIP3,KITLG,KRT18,KRT8,MARCKSL1,MDM2,MMP7,MPZ,NR1H4,NT5E,OCLN,PC,PCK2,PDX1,PPARG,PTGDS,RAMP3,RAP1GAP2,RXRA,SAT1,SCD,SLC2A4,SPINT2,TNF,TNFSF10,VCAM1	674 (20)
docosahexaenoic acid		chemical drug		0.035		0.000152	ARG1,BDNF,CCN2,CDH1,CEBPA,COL1A1,DDIT3,DPYSL2,FADS1,FADS2,FOS,HPGD,IL6,LOX,LOXL1,LOXL3,MRC1,NOX4,PIK3R1,PLA2G4A,PNPLA2,PPARA,PPARG,PRKG2,RXRA,SCD,SLC2A4,SMAD6,SORL1,SPHK1,THBS2,TIMP2,TNF,VCAM1	826 (24)
doramapimod		chemical drug	Inhibited	-2.213	bias	0.000154	CCN2,HAS2,IL6,TNF,TP63	779 (20)
MMP9	-0.78	peptidase		0.007		0.000159	ACTA2,CCND1,CDH1,COL18A1,CTSK,DDIT3,FOS,GJA1,HPGD,ICAM1,ICAM5,IL1A,IL6,JAG2,MMP3,NFATC1,OCLN,TNF,VIM	752 (19)
testosterone		chemical - endogenous mammalian		0.127		0.00016	A2M,ADRB1,AMD1,ANGPT1,ANKRD1,APLN,AR,ATF6,ATP1B1,BCL2L15,BDNF,BGN,CAV1,CCND1,CDH1,COX6A2,CYP7B1,DDIT3,ESR1,ESR2,FBXO32,FGFR2,FOS,FOSL1,FOSL2,GGT1,HSPA1A/HSPA1B,IGFBP3,IGFBP5,IL33,IL6,LGALS1,MAL,MGST1,MMP7,NGFR,NOS1,OCLN,ODC1,PDE3B,PIK3R1,PMP22,PPARA,PPARG,PRKCZ,Rhox5,RIMS2,SCNN1A,SERPINB5,SLC39A8,SSTR2,TNF,TNFRSF11B,TP53,TUBB3,UGT8,VCAM1,VCAN,VIPR1,WNT5A	1048 (21)
2-bromoethylamine		chemical reagent		0	bias	0.000166	A2M,ADAMTS1,CAPN6,CLDN4,CP,ELF3,EMP3,GPX2,LAMC2,LCN2,MRC1,PLA1A,SLC34A2,VIM
RORC	-3.865	ligand-dependent nuclear receptor		0.648		0.000166	ACOT2,ASNS,ATP1B1,CISH,CYP39A1,CYP3A5,CYP7B1,GSTA5,HPGD,IL12RB1,IL1A,IL23R,IL6,KCNK5,LCN2,NSDHL,REL,RHBG,RORA,RORC,SDR9C7,SELENBP1,SLC29A4,SLC41A2,SLC7A2,Sult1a1,TNF,UGGT2,USP53,VLDLR,ZBTB16	595 (14)
RUNX2	0.949	transcription regulator		0.044		0.000172	ACTA2,ADAMTS5,ALPL,BMP2,CCND1,CDH1,CEBPA,COL10A1,COL11A1,COL1A1,COL1A2,COL24A1,DPYSL3,FGFR2,FLRT2,GALNT3,HTRA1,ISL1,LUM,PCDH18,PTGDS,SMAD6,SOX5,SOX6,TAGLN,TNFRSF11B	788 (23)
FAS	0.529	transmembrane receptor		-0.876		0.000173	ACTA2,ARL4A,BCL11A,BGN,BTG3,CAMK2B,CCN2,CD1D,COL18A1,COL1A1,COL1A2,COL5A1,CXCL6,Cxcl9,DYRK3,F2RL1,F3,FAIM2,FBN1,FES,FOS,FSCN1,GDE1,GLIPR1,GPLD1,GRIA3,ICAM1,IFIT1,Ighg2b,IL13RA1,IL18R1,IL1A,IL6,IQGAP2,ITGA7,LUM,MGP,NECTIN1,PDX1,PGLYRP1,PLCL2,PPFIBP2,PPP1R15A,PRKCI,PTGER4,PTPRN,PTPRN2,RAPGEF5,RND1,SERPINB2,SORL1,THBD,TNC,TNF,TNFRSF11B,TNFSF10,TRAF3,VCAM1,WNK1	577 (13)
SATB2	-2.026	transcription regulator		0.039		0.000174	ADGRG6,AUTS2,BBC3,BCL11B,CDH3,FLVCR2,KRT8,MDM2,MFAP2,NOX4,PERP,PIEZO2,PRRX1,PWWP3B,SDC2	431 (7)
HIC1	0.818	transcription regulator		0.718		0.000176	ACKR3,ACTA2,ADORA2B,AHNAK2,AMIGO2,CA12,CCND1,CXCL14,CYP7B1,FADS1,GPR161,KAZN,LCN2,PLA2G4A,SMPDL3A,SNAP25	516 (12)
Fibrin		complex		-0.816		0.000176	ACTA2,CDH1,CNN1,F3,ICAM1,IL6,KRT18,NGFR,TAGLN	395 (12)
FAM3B	4.585	cytokine				0.000176	CAV1,DAPK2,GJA1,IGFBP3,IGFBP4,KRT19,LCN2,LGALS1,PTN
RUNX1	0.196	transcription regulator		0.571		0.000181	ALCAM,ALOX12,ANK1,AQP1,ATF6,BBC3,BDH1,BTG2,CCND1,CD34,Cdkn1c,CDKN2A,CDKN2B,CEBPA,DDIT3,DEPTOR,EPAS1,FAT4,FSCN1,GATA3,GNA15,Hmga2,IGFBP3,IL23R,ISG15,LTB4R,MAP3K6,MECOM,MYL9,NCAM1,PCDH7,PIK3R1,Pmaip1,Podxl,PPP1R15A,RORC,SLC24A3,SOX5,SOX6,Stfa3,Tcf7,TP53,TSPAN33,ZBTB16	718 (18)
diallyl disulfide		chemical - endogenous non-mammalian		-0.87		0.000183	FOS,GDF15,GJA1,GSTM5,IL6,NFATC1,NOS1,NQO1,NT5E,TNF,TP53	603 (20)
curcumin		chemical drug		-1.682		0.000184	ACTA2,ADAMTS5,AQP1,AQP4,AR,AXL,BBC3,BDNF,CAV1,CCN2,CCND1,CDH1,CDKN2A,CEBPA,CLDN4,COL1A1,COL1A2,DDIT3,DNMT3B,EHHADH,F3,FOS,FOSL1,FOSL2,FOXG1,GCLM,GNA11,HSPA1A/HSPA1B,ICAM1,IGFBP4,IGFBP5,IL6,MAP2,MARCKSL1,MDM2,MMP3,MMP7,MST1R,NCAM1,NQO1,OCLN,PDE3B,PGF,PNPLA2,PPARA,PPARG,PPARGC1A,PTN,SERPINB1,SLC2A4,TIMP3,TNF,TNFRSF10A,TOB1,TP53,TRAF1,TSC22D3,TUBB3,VCAM1,VIM	738 (15)
PI3K (family)		group		1.904		0.00019	ACTA2,CDH1,Cdkn1c,CDKN2B,DDIT3,EGLN3,ESR1,FBXO32,FDPS,FOS,GCLM,IFIT1,IL6,ISG15,MMP3,NQO1,PDGFB,PRKCZ,RIPK3,SOX4,TNC,TNF,TNFSF10,TP73	830 (20)
RGS4	-1.742	enzyme		1.091		0.000192	ADHFE1,Calcb,CPLX2,EIF5A2,ESR2,GPC4,INPP5J,MEGF6,NGFR,Nppb,NRIP3,NTNG1,NUP210,PAPPA,PAQR8,POSTN,PPARGC1A,PPM1E,PRSS12,RPS6KA2,SCN7A
Brd4	0.256	kinase	Activated	3.978	bias	0.000202	ACTA2,C1R,CDH1,COL1A1,COL1A2,COL4A5,COL5A2,Cxcl9,EDNRB,HOXA11,IL1A,IL6,LOX,Serpina3g (includes others),TAGLN,Tgtp1/Tgtp2,Tmsb4x (includes others),TNFSF10	769 (20)
Ngf		group		-0.497		0.000211	BBC3,BDNF,CCND1,FOS,MAP2,MAP6,MMP3,NCAM1,NGFR,NOS1,ODC1,PLAUR,SLC12A4,TP53,TTLL7,TUBB3,VGF	640 (18)
NFAT5	0.195	transcription regulator		1.456		0.000215	AQP1,AR,AREG,CLIC3,COL1A1,COL1A2,Cxcl9,F3,HSPA2,IGFBP7,IL18R1,IL1RN,IL23R,IL6,LCN2,Mx1,NOX4,PRSS35,S100A4,SCNN1A,SCNN1B,SEMA4C,SLC7A2,TNC,TNF,TNFRSF11B,TNFSF10,TRAF1,VCAM1,VLDLR	556 (18)
GRIN3A		ion channel		-1.444	bias	0.000219	ARC,BDNF,BMP3,CNTNAP1,CNTNAP4,EPHX4,GDA,GPR176,KCNA4,LRRK2,LUM,MAL2,MTHFD2,NSUN7,POPDC3,RNF152,ROBO2,SORL1,STARD4,TMEFF1,TMEM117,VLDLR,WIF1,XK
CCR2	1.388	G-protein coupled receptor	Activated	3.196		0.000219	ARG1,ASPN,BGN,CCL24,COL12A1,COL14A1,COL1A1,COL1A2,CXCL6,Cxcl9,DPT,FBLN1,FBLN2,FBN1,IL1A,IL6,LUM,Mcpt1,OGN,PCOLCE,TIMP2,TNC,TNF,VCAN	833 (20)
JAG2	4.997	growth factor		-0.563		0.000223	BMP2,C3,CCL24,CXCL6,HES1,IL13RA1,IL1A,IL1RN,IL6,LTB4R,NOTCH3,TNF	284 (9)
Gli		group		-0.447	bias	0.000224	ACTA2,CCND1,COL10A1,COL1A1,HHIP,JAG2,S100A4,SFRP1	297 (3)
MST1R	6.104	kinase		-0.388		0.000224	ACTA2,ARG1,CCND1,CDH1,FOS,MST1R,TNF,VIM	774 (18)
RARG	1.026	ligand-dependent nuclear receptor		-0.535		0.000225	AREG,BMP2,CCN2,CRABP2,CRYAB,DHRS3,FOS,FOXC1,GJB4,GREB1,HAS2,HOXA10,IGFBP6,IL6,KRT5,Ly6g6e,Meis1,MMP11,NTN1,SOX2,THBD	834 (22)
dehydroisoandrosterone		chemical - endogenous mammalian		0.204		0.000226	AQP3,AR,CCND1,CYP3A5,EDIL3,ESR1,FKBP5,ICAM1,IL23R,Nppb,PPARG,RORC,Saa3,SCD,SLC27A1,TMPRSS2,TNF,TP53,VCAM1	640 (14)
RARA	-0.989	ligand-dependent nuclear receptor		0.936		0.000233	AR,ATF5,C5,CA12,CCND1,CEBPA,CLMN,CP,CRABP2,DHRS3,EIF5A2,ENAH,EPHX4,FOS,FOSL2,FOXC1,GATA3,GDF15,GJB4,GREB1,HOXA10,HOXD10,IGFBP6,IL12RB1,IL1A,IL23R,IL6,IRF6,JUP,KLF8,KRT15,KRT5,LGALS1,LIFR,LTF,Ly6g6e,MALL,MAP1B,Meis1,MGP,MMP11,MUC20,NAV2,NTN1,PHF19,PRDM8,RBP1,RORC,Saa3,SOX2,THBD,TNF,TNFRSF10A,TNFRSF11B,TP63,TTC9,XK	809 (21)
miR-141-3p (and other miRNAs w/seed AACACUG)		mature microRNA	Inhibited	-2.821	bias	0.000241	BCL2L15,CACNA1G,CDH1,COL1A2,CYP1B1,EPCAM,FOXF2,IRF6,ISL1,KCNK1,LSR,MSLN,PERP,PITX1,RNF128,SOX2,TP73,VIM	615 (12)
Calcineurin A		group		0.563	bias	0.000248	ATP2B4,CCN2,CCND1,COL1A1,COL1A2,FOS,GJA1,MB,Nppb,PPARGC1A,SLC2A4	633 (20)
4-(2-aminoethyl)benzenesulfonylfluoride		chemical - protease inhibitor	Inhibited	-2.111	bias	0.000248	COL11A1,COL1A1,COL1A2,DDIT3,DMP1,ENPP2,ENPP3,FBN2,SERPINI1,TAGLN,TNC	345 (7)
ATP2B2		transporter		0.898		0.000249	A2M,CBR3,CLIP3,DDIT3,DDR2,FLNC,IGFBP5,IL12RB1,LOXL1,SLC1A5,SLC66A3,Tgtp1/Tgtp2,UBD
SYK	0.53	kinase		0.171		0.000252	BMPR1B,CCND1,Cxcl11,Cxcl9,FOSL1,GATA3,GPLD1,ICAM1,IL6,KLHL31,LY9,NFATC2,OAS2,PLEKHG1,TFPI2,THPO,TNF,TNFSF10,TNFSF13B,TP53INP1,TRIB2,TSC22D1,TSC22D3,USP53	702 (18)
ERBB3	-2.461	kinase		0.096		0.000252	ACTA2,AXL,BGN,CCN2,CCND1,CDH1,Cma2/Mcpt9,COL1A1,CTSK,ERBB3,F3,FBLN2,FBN1,FSTL1,GZMH,HAS2,IGFBP5,MMP3,NID1,Serpina3g (includes others),SFRP1,TIMP3,TNC,TNXB	717 (18)
2,2-bis(4-hydroxyphenyl)-1,1,1-trichloroethane		chemical - endogenous mammalian	Inhibited	-2		0.000252	AR,ESR1,ESR2,GSTA5,IGFBP5,PGR	502 (10)
PDGFB	2.15	growth factor		1.434		0.000254	ACTA2,AQP1,BBC3,CCND1,CNN1,COL1A1,COL1A2,FOS,ICAM1,IL1RN,IL6,MMP3,NOTCH3,RGS5,RIPK3,SERPINF1,TNC	556 (17)
FANCC	0.093	other		0.894		0.000254	ATP1B1,CAMK2B,CYP7B1,FZD2,GDF15,HES1,HHEX,IGFBP3,MAP1B,MMP7,NUAK1,RND3,SFRP1,TACSTD2,TNF,TOM1L1,TP53	809 (17)
POU2F1	-0.069	transcription regulator		1.161		0.000255	A2M,Aldh1a7,AOX1,BBC3,CCND1,ESR1,GCLM,GPX3,GSTM5,Gstt1,ICAM1,IDH1,Ifi202b,IGKC,IL6,ISL1,PDE9A,PRKAA2,PTGDS,REL,SERPING1,TIMP3,TMPRSS2,TNFRSF10A,VCAM1	305 (7)
metronidazole		chemical drug		0.067		0.000255	ACTA2,ADRB1,AGMO,AK1,ALCAM,BMP6,CCND1,DAGLA,EPB41L2,FOS,GARNL3,Gm3383 (includes others),IGFBP5,IL6,LGALS1,MYO1B,NAV2,NPNT,NUAK1,PTGDS,PTPRZ1,SDC3,SOX4,TMC7,TNF	782 (19)
genistein		chemical drug	Inhibited	-2.175		0.000255	A2M,AKR1C3,ALDH5A1,AR,ARG1,ARSA,BDNF,BMP2,BTG3,C16orf54,C3,CCN2,CCND1,CEBPA,CHD5,COL1A1,CTSK,CXCL6,DNPH1,ESR1,ESR2,F3,Fcna,FOS,GAL3ST1,GBA,GDF15,GJB2,GLCE,GSTA5,HLA-A,HOXA10,HOXA11,HPGD,HS3ST3A1,HSPA1A/HSPA1B,ICAM1,IL6,KRT14,LTF,MAL2,Mcpt1,MMP3,PDCD4,PGR,PIK3R1,PPARG,PXMP4,RXRA,SCPEP1,SGSH,SLC1A5,SLC4A4,SLC6A14,SORT1,SPHK1,TAGLN,TNF,TNFRSF11B,TP53,VCAM1,WNT5A	885 (19)
TINCR		other		1.813		0.000258	ABCA12,ALOX12B,AXL,CHAC1,DDIT3,EPAS1,LORICRIN,PADI1,PDGFB	373 (7)
HOXA13	6.222	transcription regulator		1.238		0.000258	AR,BMP2,ENO1,EPHA7,GJA1,GLI3,HOXA13,IL6,WNT5A
BRD7	0.132	transcription regulator		-1.276	bias	0.000258	BBC3,CDH1,ESR1,KRT8,MDM2,PYCARD,VCAN,VIM,ZMAT3	755 (22)
SELENOS	-0.494	other		-0.239	bias	0.00026	ATF6,CAV1,CEBPA,DDIT3,IL6,PPARG,TNF	270 (7)
IDH2	-0.278	enzyme				0.00026	CDH1,CEBPA,CLDN3,CLDN7,PPARG,RAB25,VIM	370 (7)
mir-140		microRNA		-1.075	bias	0.00026	ADAMTS5,CDH1,IL6,LOX,SOX2,TNF,VIM	269 (7)
MYH9	0.004	enzyme	Inhibited	-2.449		0.00026	CRCT1,Flg,HOXA13,HOXD10,LORICRIN,SOX2,WNT5A
SPINT1	4.723	other		-0.943	bias	0.00026	APCDD1,IGFBP4,PTK7,Tcf7,WIF1,WNT11,WNT5A
HOXA7	1.263	transcription regulator		-0.405	bias	0.000262	CD34,CDH1,FLT3,LAT2,PGR,SOX4,TGM1,Tmsb4x (includes others),TSC22D1,VIM
deoxynivalenol		chemical toxicant		0.843		0.000262	ATF6,CLDN1,CLDN3,CLDN4,FBN1,ICAM1,IL6,OCLN,PAPSS2,TNF	783 (23)
FGF8		growth factor		0.066		0.000262	AIF1L,BMP2,CCND1,COL18A1,CRIP1,CRYAB,DLX1,FBXL16,FGFR2,FOXG1,HOXD13,LAMB3,Meis1,MSX1,NDRG2,PAX5,PCOLCE2,RTKN2,TNFRSF11B,TNXB,TUBB3	328 (7)
MEN1	0.406	transcription regulator		-1.353		0.000263	AR,CCND1,CDH1,CDKN2B,FKBP5,FOS,FOXC1,GAS1,IGFBP2,Meis1,PDX1,PTN,PTPRZ1,RORC	760 (20)
mir-30		microRNA		-1.345	bias	0.000263	ADAM12,AR,BBC3,CCN2,CDKN2A,IL6,NT5E,PRDM1,RAB38,STK39,TNF,TP53,UGT8,VIM	630 (17)
beta-naphthoflavone		chemical toxicant		0.508		0.000263	CBR1,CYP1B1,CYP2S1,CYP2U1,FOS,GCLM,GSTA5,GSTM5,ME1,NQO1,Saa3,SLCO3A1,UGT1A1,UGT1A6	769 (17)
TGFA	0.254	growth factor		0.143	bias	0.000268	AREG,CCN2,CCND1,ESR1,FOS,FOSL2,GJB2,ICAM1,IGFBP4,IL6,LAMC2,LCN2,PLA2G4A,PLA2G5,RB1,SERPINB5,TP53,VIM,WNT5A	926 (20)
MEF2A	-0.876	transcription regulator		1.577	bias	0.000268	AQP4,ARHGEF19,BDNF,Cxcl11,Cxcl9,ENO3,FOS,GATA3,Gsta4,GSTA5,Ifi47,ITGA7,Mx1,MXD1,Nppb,PDE7A,PPARGC1A,SLC2A4,THBD
PPP3CA	-0.41	phosphatase		-0.115	bias	0.000268	ALOX12,C3,CD5,CRYAB,KRT18,KRT8,LCAT,LORICRIN,LPAR1,MGST1,NFATC1,Nppb,PDPN,PMP22,PTGFR,S100A4,SLC2A4,TNF,VIM	707 (21)
TAL1	0.351	transcription regulator		-0.862		0.000269	ADCY3,Aldh1a7,ARSA,ARVCF,C3,CACNG4,CDKN2A,CHST11,CIB2,DSC3,DSG2,ELOVL4,FBN1,GATA3,HLA-A,HLA-E,ICAM1,IL31RA,MAP2,MEST,MSLN,MVD,MYO1E,NOS1,P2RY1,PRSS8,PTGER4,PTPRU,RAPGEF5,REL,RIPK4,SERPINB2,SLC4A11,SOX4,TMEFF1,TNFSF10,TOB1,TRAF3,TSPAN7	335 (10)
filgrastim		biologic drug		-1.014		0.000274	ADAM28,ALOX15,ALPL,ANGPT1,AOC3,ARHGAP24,ATP1A3,ATP2B4,ATP9A,BTG2,CAVIN2,CBR1,CEACAM1,CHIT1,COL27A1,CPD,CYP1B1,DHRS9,DPYD,DPYSL3,E2F2,EDARADD,ENO1,FA2H,FABP5,FKBP5,GLIPR1,GNG11,GPR84,HHIP,HPGD,IFIT1,IGF2BP2,IGKC,IL18R1,IL31RA,ISG15,ITGB7,JARID2,LAMB3,LGALS12,LTB4R,LYSMD2,MAP2K6,NHS,NMNAT2,PCSK9,PLAG1,PLAUR,QSOX1,RAB37,RNF43,S100A4,SERPINB1,SERPING1,SGSH,SLC45A3,SMPDL3A,SORT1,TNFRSF10A,TSC22D1,TUSC…
miR-17-5p (and other miRNAs w/seed AAAGUGC)		mature microRNA	Inhibited	-2.271	bias	0.000289	ACTA2,ALDH1A3,BAMBI,BMP2,CCND1,CLCA2,E2F2,ESR1,IL6,KRT17,MMP3,MYLIP,PPARA,PPARG,RB1,RGS5,TNF,TP63,TP73,VIM	544 (12)
mitoxantrone		chemical drug		-0.534		0.00029	BBC3,COL1A1,COL1A2,Cxcl9,IL6,Mx1,OAS2,PERP,SFRP2,TNF,TP53,TP63	611 (14)
cobalt chloride		chemical reagent		-0.942		0.000306	ACTA2,ADAMTS1,ADORA2B,BBC3,BDNF,COL18A1,CP,CYBRD1,CYP1B1,E2F6,EPAS1,MDM2,PLAUR,PROM1,RGS5,SERPINF1,SLC1A1,SMAD6,SORL1,SPHK1,TP53	623 (17)
SMARCA2	-2.081	transcription regulator		0.64		0.000306	ALPL,BMPR1B,CDH1,COL11A1,CP,DES,DMP1,FKBP5,HES1,IGFBP5,IL6,LAMC2,MPZ,MSX1,PPARG,RAB27A,TAGLN	805 (23)
DNMT3A	0.457	enzyme		-1.448		0.000319	AKAP6,APLN,ATP2B4,CASP14,CDH1,CPLX2,DNMT3B,E2F2,FOXA1,FOXF2,IGFBP5,IL18R1,JCHAIN,MAPK13,MYL9,NFATC2,NQO1,P2RY1,PAK6,PAX5,PCBP4,PLCB4,PPP1R14C,PRKCI,PTPN13,Rhox5,S100A1,SALL3,SLC8A1,SSBP2,ST14,SYNE3,Tcf7,TSC22D1
APP	-0.021	other		0.996		0.000322	ACTA2,AK1,ALDOC,Anp32a,APBB1,ARC,ARG1,ATP1A3,ATP1B1,AXL,BACE2,BASP1,BBC3,BDNF,BIN1,BMP6,C1R,C1S,C3,CA12,CALML3,CCN2,CCND1,CDH1,CDH3,CDKN2A,CH25H,CKMT1A/CKMT1B,CLDN1,COL13A1,COL18A1,CP,CPLX2,CRABP2,CRLF1,CXCL6,Cxcl9,DDAH1,DNM1,DPYSL2,ECE2,EIF5A2,ELOVL4,ENO1,ENPP2,EPAS1,EPHB2,ESR1,EYA4,F2RL1,FOS,FZD1,GDF15,GRIN1,Gsta4,HAP1,HDAC11,HES1,HLA-E,HSPA1A/HSPA1B,ICAM1,Ifi47,IGF2BP2,IGFBP2,IGFBP5,IL13RA2,IL…	617 (15)
EIF4EBP1	-0.86	translation regulator	Inhibited	-2.821		0.000328	ARG1,BBC3,CCND1,CEBPA,Cxcl11,DDIT3,IL1RN,IL6,MDM2,PNPLA2,PPARG,PPARGC1A,SERPINB2,TNF	566 (15)
2,3,4,7,8-pentachlorodibenzofuran		chemical toxicant		0.914		0.000328	ACOT2,CAP2,CCK,COL1A1,CYP1B1,EPB41L3,ESR1,HSPA1A/HSPA1B,HSPA2,IDH1,ITGA7,NQO1,PTGFR,UGT1A6
PLAG1	-3.76	transcription regulator		-0.737		0.000329	AQP1,ATF5,CHST1,CREB3L1,CRLF1,EFNB1,FLNC,KRT19,MAP2,NFATC1,NPTXR,PLAG1,QSOX1,TRAF1,TSPAN4
NGFR	-2.085	transmembrane receptor		1.768		0.000329	A2M,CCND1,FGFR2,FOS,GRIA3,NCAM1,NGFR,RB1,SNAP25,SORT1,TNF	624 (20)
PAK1	-0.95	kinase		-0.59		0.000329	CCND1,CDH1,CDKN2A,F3,FBXO32,FOSL1,HES1,OCLN,PGR,TFPI,TP53	705 (18)
SMAD2	0.048	transcription regulator	Activated	2.891		0.00033	ACTA2,ADAM12,ALPL,BGN,CCN2,CDH1,CDKN2A,CDKN2B,COL1A2,CRISPLD2,HAS2,HES1,HHEX,IL6,IRX1,NET1,PDGFB,PDX1,PTHLH,SOX2,SPHK1,SYT7,TIMP3,VIM	799 (17)
ILF3	-0.275	transcription regulator		-1.679		0.000338	ACAT2,ALCAM,CH25H,CHKA,COL14A1,FABP5,FADS2,FDPS,FKBP5,FOS,IL1RN,IL6,ISG15,NSDHL,PLAUR,PPARG,PTGER4,SCD,TNC,TRAF1	622 (14)
IL1		group	Activated	2.864		0.000338	ADAMTS1,ADAMTS5,ALDH3A1,AR,AREG,BDNF,BMP2,C3,CBR3,CD34,CEACAM1,COL1A1,CP,ELF3,F3,FOS,GDF15,GGT1,GJA1,ICAM1,IL1RN,IL33,IL6,KITLG,KYNU,LOX,MAP2K6,MMP3,MMP7,NFATC2,NGFR,NR1H4,NRP2,ODC1,PIGR,PLA2G4A,PPARA,PPARG,PPARGC1A,RORA,RORC,RXRA,S100A3,Saa3,SERPINB2,SPHK1,THBD,TNC,TNF,TNFRSF11B,TNFSF10,TP53,VCAM1,VCAN,WNT5A	659 (13)
PKNOX2	1.619	transcription regulator		1.287		0.000341	BBC3,BTG2,CDH1,ESR1,IGFBP5,TP53,TP73,VIM
SAV1	0.183	other		-1.23	bias	0.000341	CCN2,CCND1,CDKN2A,COL1A1,IL6,SOX4,TNF,VIM	432 (9)
SMARCD3	-0.946	transcription regulator		1.673	bias	0.000341	ALCAM,COL1A1,DEPTOR,FMOD,MGP,SOX5,SOX6,WNT5A
CCND1	-2.592	transcription regulator		0.612		0.000342	ALDH1A3,AQP3,AR,AREG,ASAP2,Bmyc,CCND1,CDH1,CDKN2A,CDKN2B,COL1A1,COL27A1,COL5A2,DKK2,EIF5A2,ENO1,ENPP2,EPGN,GALNT11,GPC6,HECTD2,HSPA1A/HSPA1B,ITGB6,KRT14,KRT4,MARK1,MEIS2,MMP3,MYBL1,NT5E,PDCD4,PGR,PMEPA1,PPARG,RAB3B,RB1,RBMS3,SELENBP1,SLC4A4,SOX11,SOX2,SOX4,ST6GALNAC5,STARD4,STBD1,SVIP,TIAM1,TMPRSS2,TNF,TP53,TP53INP1,WNT7A,ZNF462	739 (20)
flutamide		chemical drug		-0.232		0.000355	AR,CYP1B1,CYP3A5,ESR1,ESR2,FOS,FOXQ1,IL6,KITLG,ME1,NQO1,ODC1,PSCA,PTHLH,Rhox5,SLCO3A1,TNF,TUBB3,UGT1A6,VIM,WIF1	853 (23)
hydrogen peroxide		chemical - endogenous mammalian		0.782		0.000356	Abcb1b,ACAT2,ACTA2,AEN,ANKRD1,AR,ATF6,AVPR1A,BBC3,BTG2,CAV1,CCN2,CCND1,CDH1,CDKN2A,CLDN7,COL1A1,COL1A2,CRYAB,CXCL6,DDIT3,ENPP2,EPAS1,F2RL1,FBXO32,FDPS,FOS,FOSL1,FZD2,GCLM,GDF15,Gsta4,GSTA5,ICAM1,IL6,KCNQ1OT1,KITLG,LCN2,LGR4,LTB4R,MB,MDM2,MMP3,NOS1,NOTCH3,NQO1,ODC1,OSGIN1,PDCD4,PDGFB,PGF,PKIA,PLAUR,Pmaip1,PPARG,PPARGC1A,PRKCI,PTGER4,PTN,RAB27A,REL,SCNN1A,SFRP2,TAGLN,TGFBR3,TNF,TP53,TP53INP1,TP73,T…	744 (15)
ERN1	-0.955	kinase		0.276		0.000359	ACTA2,AP1M2,CDH1,CLDN7,CNTN1,CYP1B1,DDIT3,DGAT2,EPCAM,FKBP11,GOT1,HOOK1,IL6,ITGB6,LAD1,MPZL2,MVD,NOX4,OAS2,PADI4,PPARG,PROS1,SCD,SERPINB2,SPTLC3,ST14,TMPRSS2,TNF	668 (21)
GRHL2	5.9	transcription regulator		1.714		0.000359	BMP2,CDH1,CLDN4,ERBB3,NOTCH3,NRP2,OCLN,SEMA3B,TGM1,TP63	458 (6)
USP7	0.366	peptidase		0.211	bias	0.000359	ACKR3,CDKN2A,FKBP5,IL6,ITGB7,MDM2,PDE9A,PPARG,TNF,TP53	686 (19)
F2		peptidase	Activated	3.206	bias	0.000363	ACTA2,ANGPT1,CBR3,CCN2,CCND1,COL1A1,COTL1,DHRS9,DKK3,ECE1,EDNRB,F2RL1,F3,FHL1,FOS,FOSL1,FOSL2,GREM1,HAS2,HOXD10,ICAM1,IGFBP4,IGFBP5,IL6,PDGFB,PGR,PLA2G4A,PLAUR,PROS1,SAMD4A,SLC2A12,SOX15,TENT5A,TFPI,TFPI2,THBD,TIMP2,TNF,TNFSF10,TRAF1,TRAF3,TRPC1,TUBB3,VCAM1,ZNF205	842 (19)
LINC00963		other		-0.594		0.000369	CREB3L1,DDIT3,FGF19,ICAM1,IL2RG,IL6,PCK2,TNF,TRIB3	514 (12)
UBE3A	-0.961	enzyme		-1.725	bias	0.000369	AR,ARC,CDKN2A,ESR1,MDM2,PGR,TP53,TP53INP1,WNT4	742 (20)
RAS		group		0.292		0.000373	B4GALT5,CAV1,CCK,CCN2,CCND1,CDKN2A,CDKN2B,CEBPA,CHD5,CLDN4,FOS,FOSL1,GRIN1,Ifi47,IL1A,IL6,ODC1,PDCD4,PDGFB,PLAUR,PRDM1,TFPI2,TNF,Tnfrsf22/Tnfrsf23,TP53,VIM	660 (18)
SB-431542		chemical reagent		0.059		0.000373	ACTA2,ASPN,BGN,BMP6,CCN2,CCND1,CDH1,CDKN2A,COL1A1,ECSCR,FOS,GJA1,GJB2,GJB6,IDI1,IGFBP7,ITGA11,KRT18,MVD,NSDHL,POSTN,SCN7A,SERPINB2,SMAD6,TNFSF10,VIM	681 (19)
kanamycin A		chemical drug		0		0.000374	ADRB1,AGMO,AK1,ALCAM,BMP6,CCND1,DAGLA,EPB41L2,FOS,GARNL3,Gm3383 (includes others),IGFBP5,LGALS1,MYO1B,NAV2,NPNT,NUAK1,PTGDS,PTPRZ1,SDC3,SORT1,SOX4,TMC7
LASP1	-0.159	transporter	Inhibited	-2.174		0.000377	CDH1,EPCAM,MARVELD2,S100A4,VIM	376 (12)
OTUB1		enzyme		-1.143		0.000377	ESR1,GREB1,ITGB7,NUAK1,PGR
telmisartan		chemical drug		-0.983		0.000401	ACE2,APLN,BDNF,CCN2,ICAM1,IL6,MRC1,OCLN,PLA2G5,PPARA,PPARG,PTH1R,SLC2A4,TNF,TRPC1	655 (18)
KAT6A	0.178	enzyme		1.161	bias	0.000405	CCN2,CDKN2A,CDKN2B,DLX1,E2F2,ESR1,GLCE,GPLD1,HOXA10,HOXA11,HOXA13,HOXB2,HOXD10,HOXD11,HOXD13,OSR2,SMARCA2,SMOC1	378 (7)
BCOR	0.852	transcription regulator		-1.897	bias	0.000407	ADAMTS1,ARID3A,CEBPA,COL18A1,FOXQ1,GAS1,GJB2,HOXD13,IGFBP5,ISG15,NFATC1,PRDM1,PTK7,SOX13	390 (7)
HDAC3	0.183	transcription regulator		-0.756		0.000411	ARG1,BMP2,CCND1,CD34,CDH1,CDKN2A,COL1A2,E2F2,ENPP2,FOS,ICAM1,IL6,JUP,ME1,NFATC1,PRDM1,SCD,SMARCA2,TAGLN,TNF,VIM	897 (24)
RHOA	-0.936	enzyme		-0.743		0.000411	ACTA2,CCN2,CCND1,CDH1,CDKN2A,CDKN2B,COL10A1,COL1A1,Cxcl11,ESR1,FOS,GDF15,ICAM1,IL6,OCLN,PPARA,PRKG1,RND3,SDC2,TAGLN,VCAM1	573 (20)
PYHIN1		other		0.882		0.000412	IL6,MDM2,TNF,TP53	571 (14)
RAD51C	1.336	enzyme		0		0.000412	ESR1,KRT18,KRT8,PGR
PRMT2	-1.391	enzyme		-1.169		0.000412	CCND1,CDH1,IL6,TNF	624 (14)
DDT	-0.096	enzyme	Activated	2		0.000412	BBC3,IL6,TNF,TP53	291 (7)
MIR143-145a		group		1.982	bias	0.000412	ACTA2,CNN1,DES,TAGLN	134 (5)
STIM1	0.306	ion channel		0.57		0.000423	AQP5,C5,GSTO1,IL6,NFATC2,NQO1,TNF	692 (18)
Gm12602	0.88	other		-1.254	bias	0.000423	BASP1,BTG2,CPA4,CRCT1,CRYAB,DHRS9,SERPINB2
spermidine		chemical - endogenous mammalian		1.131		0.000423	AMD1,FOS,IGFBP2,KRT15,KRT19,ODC1,SAT1	553 (7)
celecoxib		chemical drug		-0.794		0.000427	AR,B3GALT5,CASP14,CCND1,CDH1,CLDN4,CTSK,CYP3A5,DDIT3,DES,ESR1,F3,FOS,GDF15,ICAM1,MDM2,PPARG,TNF,TNFRSF10A,TP53,TP63,TP73,TRAF1,VCAM1,WNT5A	590 (16)
CST5		other		1.342		0.000427	ACAT2,AP1M2,ATP2C2,ATP8B1,CAV1,CDH1,CEP170,CLDN7,COL12A1,CYBRD1,DOCK5,DOCK9,DSP,EMP3,EPN3,ESRP1,EVPL,FHL1,FRAS1,GDA,GRAP,IGSF9,IQGAP2,KRT23,MAL2,MAP1B,MAPK13,MSN,MYL9,MYO5B,NPAS2,NT5E,PIP4K2A,PRSS8,RAB25,RBM47,RBP1,SH3TC2,SOX4,STEAP1,SYT7,TMC4,VCAN,VIM,VSNL1
DNMT3B	3.17	enzyme		-1.248		0.00043	ADRB1,CDH1,CDKN2A,CYP1B1,DDIT3,DNMT3B,EPDR1,ESR1,ESRP2,FBXL16,FOXA1,FOXF2,GLT8D2,HOXA13,IFIT1,MGST1,MYH14,MYL9,NAP1L2,NFATC2,PAK6,PPP1R14C,PRUNE2,PTN,RECK,Rhox5,S100A1,SAT2,SFRP2,SLC8A1,ST14,TIMP3
ETV4	-1.938	transcription regulator		0.497		0.000433	ACTA2,B4GALT5,CAV1,CDH1,CDKN2A,GGT1,HPGD,JUP,KRT5,MMP7,VIM	502 (7)
miR-221-3p (and other miRNAs w/seed GCUACAU)		mature microRNA		-1.554	bias	0.000433	BBC3,Cdkn1c,ESR1,FOS,ICAM1,IL23R,PIK3R1,SLC29A1,TIMP3,TP63,TUBB3	393 (7)
NVP-TAE684		chemical drug	Activated	2.239		0.000433	CCND1,CDH1,COL5A2,ERBB3,ESRP1,ESRP2,FOSL2,KRT14,OCLN,VCAN,VIM	520 (13)
COL5A1	2.325	other	Inhibited	-2.714	bias	0.000433	ACTA2,COL11A1,COL12A1,COL5A2,FBLN2,FBLN5,FBN1,LGALS1,LOX,LOXL1,SRPX2
GSR	0.703	enzyme		-1.599	bias	0.000433	ACOX2,AOX1,CBR1,CBR3,GPX2,Gsta4,GSTA5,GSTM5,ME1,NQO1,SCD
EIF2AK4	-0.329	kinase		-1.566		0.000433	AQP4,ASNS,ATF5,CHAC1,DDIT3,IL6,PCK2,PPARG,PPP1R15A,PRDM1,TNF	584 (18)
amiodarone		chemical drug		0		0.000433	AK4,F3,FADS2,ICAM1,ME1,NDRG2,PPARA,PPARG,SCD,TAGLN,TNF	493 (19)
FFAR3		G-protein coupled receptor		-0.074		0.000435	BCL11A,CHD5,CLSTN3,Cxcl11,Cxcl9,ENPP2,EYA1,FADS2,FXYD3,ICAM1,IL1A,KCNH1,P4HA2,PCSK9,PITPNM3,PPARG,SMOC1,TP53,VSNL1	327 (7)
mir-15		microRNA		-0.257		0.000435	ALDH1A3,AR,CCND1,HSPA1A/HSPA1B,IFIT1,IL6,ISG15,PLAUR,PNPLA2,PPARG,RECK,Rnf125,RORA,SLC2A4,SLC6A4,SOX5,TNF,TP53,WNT3A	570 (12)
JAK2	0.025	kinase		0.525	bias	0.000437	AKR1C3,BBC3,CCND1,CDH1,CDKN2A,CPLX2,ENPP2,ESR1,FOS,ICAM1,Ifitm1,IL6,JCHAIN,LAT2,LCN2,ODC1,PAX5,PCBP4,PHLDA3,RBP1,RIPPLY3,Saa3,THPO,TNF,TP53,TP53INP1,TRIB2,TSC22D1,VLDLR	824 (24)
RORA	2.863	ligand-dependent nuclear receptor		-0.743		0.000439	ACOT2,ASNS,ATP1B1,CCL24,CDKN2A,CH25H,CISH,Cxcl9,CYP39A1,CYP3A5,CYP7B1,GOT1,GSTA5,HPGD,IL23R,IL6,KCNK5,LCN2,Mcpt1,NSDHL,PPARGC1A,RHBG,RORA,RORC,Saa3,SCD,SDR9C7,SELENBP1,SESN3,SLC29A4,SLC2A4,SLC41A2,Sult1a1,TNF,UGGT2,USP53,VLDLR	474 (12)
WWC1	0.207	transcription regulator		0.816		0.000463	BMP2,CCN2,CDH1,OCLN,PDGFB,VIM	640 (12)
huaier extract granule		chemical drug		0.946		0.000463	CAV1,CCND1,CLDN7,DIXDC1,TP53,WNT5A	573 (10)
tetrodotoxin		chemical drug	Activated	2.414		0.000464	AMIGO2,ARC,ATP1B1,BDNF,BMP3,CNTNAP1,CNTNAP4,EPHX4,GDA,GPR176,KCNA4,LRRK2,LUM,MAL2,MTHFD2,NSUN7,POPDC3,PPARGC1A,RNF152,ROBO2,SORL1,STARD4,TMEFF1,TMEM117,VLDLR,WIF1,XK	487 (12)
ciglitazone		chemical drug		1.038		0.000464	ABCA12,ACTA2,AQP3,CAV1,CCND1,CD34,CRABP2,CSPG4,DES,DNMT3B,ESR1,ICAM1,IGFBP2,IL6,LCN2,MXD1,NOX4,PDX1,Podxl,PPARG,PTGER4,SFRP2,TGM1,TNF,TNFSF10,TUBB3,VCAM1	753 (21)
EGLN1	0.63	enzyme		0.386		0.000465	ADAMTS5,AREG,CDKN2B,EGLN3,EPAS1,HES1,ICAM1,IL1A,IL1RL2,IL6,JAG2,MMP3,Ppbp,TNF,TNFRSF11B,VCAM1	650 (23)
camptothecin		chemical drug		1.26		0.000473	ACTA2,AEN,AK4,ANO9,AR,ARL4A,BAMBI,BBC3,BCL11A,BTG2,BTG3,C1orf216,CAMK2B,CASP14,CCND1,CD1D,CDKN2A,CHAC1,CHST11,CXCL6,DENND5B,DYRK3,ENO3,F2RL1,F3,FES,FOS,FOXC1,FSCN1,GDE1,GLIPR1,GPLD1,GRIA3,HLA-A,HLA-E,HOXA11,ICAM1,IGFBP3,IL13RA1,IL18R1,IL1A,IL6,IQGAP2,ITGA7,LGALS7/LGALS7B,LIMCH1,MARCKSL1,MDM2,MYO6,NECTIN1,OSR2,PCBP4,PDZD2,PERP,PGLYRP1,PLAC8,PLCL2,PPFIBP2,PRKCI,PTGER4,PTPRN,PTPRN2,PYCARD,RAPGEF5,RB…	565 (13)
RGS2	-0.291	enzyme	Inhibited	-2.4		0.000474	AQP3,ARHGEF16,BTG2,Cdkn1c,Crb3,Cxcl11,EVA1A,F3,FXYD3,GCHFR,GJA1,IGFBP3,INKA1,MFSD2A,PDLIM2,PPARG,RARRES2,RFLNB,SLC16A3,SLC35F2,TMC3
sphingosine-1-phosphate		chemical - endogenous mammalian	Activated	3.169		0.000474	ACTA2,ANGPT1,CCN2,CCND1,CDH1,ENPP2,FOS,HAS2,ICAM1,IL6,KCNH2,NOTCH3,NRP2,PDGFB,RXRA,SPHK1,TAGLN,TNF,TNFRSF11B,VCAM1,VIM	708 (21)
INHBA	1.573	growth factor		1.471		0.000475	ACTA2,ACVR1B,AKR1C3,ANKRD1,BAMBI,BMP2,CCN2,CDH1,CDKN2B,CPNE8,DTNA,ECSCR,EDAR,EGLN3,ESR1,GRIA3,IL6,INHA,IRX1,ITGA11,LOX,MGP,MPPED2,MYCL,PCSK5,PLOD2,PRDM1,SERPINB2,SERPINB5,SMAD6,SOX2,SOX4,TAGLN,VANGL2	723 (22)
SFTPA1		transporter		-1.959		0.000477	ANKRD35,CCN2,COL1A1,CRLF1,CYP1B1,FOS,FZD8,GABRP,IL1A,IL6,LGALS7/LGALS7B,LOX,LRIG1,MAP1B,MRC1,SFRP2,TCEA3,TNF	428 (15)
rottlerin		chemical drug		-0.307	bias	0.000477	AQP1,CCND1,CDKN2A,CLDN1,CLDN4,CLDN7,COL1A1,DDIT3,ECE1,FKBP5,ICAM1,MDM2,MPZ,OCLN,PDCD4,PDGFB,TNF,VCAM1	522 (17)
chloropromazine		chemical drug		-1.461		0.000478	ACAT2,DEPP1,FADS2,FDPS,FGFBP1,FOS,IDI1,PLCB1,SCD,TAGLN,TNF,TSC22D3	514 (16)
tributyltin		chemical reagent	Activated	2.269		0.000483	CCN2,CCN5,CEBPA,COL1A1,COL1A2,COL5A1,Crip2,DGAT2,DKK2,F2RL1,Fmnl1,IDH1,IL33,ITGB7,PARM1,PPARA,PPARG,PTPN22,SYT13,THBS2,TIGIT,TMPRSS11F,TNC,UNC13C,WNK4	560 (12)
FGFR1	-1.734	kinase		1.955		0.000484	ADAMTS5,ATF6,CCND1,COL10A1,COL1A1,DDIT3,FOS,H60b/H60c,HAS2,HES1,IL6,MMP3,MSX1,PDCD4,PITX1,PLAUR,PPARA,PRSS27,SFN,Skint1,TUBB3,VIM	636 (18)
GPER1		G-protein coupled receptor		-0.013	bias	0.000488	ACTA2,CCN2,CCND1,DDIT3,EDN2,ESR1,FOS,LTF,PPP1R15A,PTGER4,RND1,SFRP2,SLC1A1,TAGLN,TNF	904 (22)
NOTCH3	5.281	transcription regulator		1.802	bias	0.000488	ACTA2,ARHGEF4,CDH1,CDH11,Cdkn1c,COL5A1,DES,EPAS1,HES1,MSI1,PROM1,RGS5,SDC2,TAGLN,TP53	533 (13)
D-fructose		chemical - endogenous mammalian	Activated	3.131	bias	0.000499	ACTA2,CEBPA,COL1A1,ICAM1,IL1A,IL6,PPARG,SCD,SLC2A12,SLC2A4,SLC5A1,TIMP3,TNF	771 (19)
MAP3K1	1.711	kinase		0.807	bias	0.0005	CCND1,CSTA,FOS,LOXL3,MMP3,PGR,PLA2G4A,PLAUR,TNC,TNF,TNFRSF10A,TP53,TPH1,Wfdc18	553 (17)
DETA-NONOate		chemical reagent		1.228		0.0005	BGN,CAV1,CCND1,FOS,ICAM1,IL6,ODC1,PDE3B,PRKG1,TNF,TNFRSF11B,TP53,TP73,VCAM1	746 (21)
N-[N-(3,5-difluorophenacetyl-L-Ala)]-S-phenylglycine t-butyl ester		chemical - protease inhibitor		-1.161		0.0005	ACTA2,HES1,ICAM1,IL6,PDGFB,PTGDS,PTPRF,RBPJ,REL,RND3,RORC,S100A4,SOX2,TNF	636 (18)
AXIN1	-0.303	other		0.705		0.000504	APCDD1,CCND1,CEBPA,FOS,JUP,MDM2,PPARG,TUBB3	742 (19)
SCX	-0.612	transcription regulator		-1.4		0.000504	COL1A1,MMP3,MSX1,POSTN,SOX5,TBX20,TIMP3,TNC
PD 153035		chemical drug		-1.161		0.000504	CCND1,COL1A2,DDIT3,FOS,KRT13,KRT14,UPK1A,UPK1B	723 (19)
lapatinib		chemical drug		-1.294	bias	0.000504	AREG,ESR1,FOS,FOSL1,FOSL2,LAMB3,PGR,WNT7A	644 (19)
acetaldehyde		chemical - endogenous mammalian		0.647	bias	0.000504	COL1A1,COL1A2,DDR2,FOS,IL6,PPARA,PPARG,TNF	591 (18)
tamibarotene		chemical drug		0.864		0.000504	APLN,CEACAM1,EFNB1,F3,LEPR,RORC,TFAP2C,THBD	415 (7)
CCN1	1.027	other	Activated	3.127		0.000509	C3,CCND1,COL1A1,COL1A2,ESR1,FZD8,IL1A,IL6,MMP3,MSX1,SFRP1,TCF7L1,TIMP2,TNF,TNFSF10,TP53,WIF1,WNT5A,WNT7A	661 (19)
phenobarbital		chemical drug		0.934	bias	0.000509	ALDH3A1,BDNF,CCND1,CYP1B1,CYP39A1,CYP3A5,CYP7B1,EPHX1,GSTA5,GSTM5,KCNK1,MDM2,PAPSS2,SAT1,Sult1a1,TP53,UGT1A1,UGT1A3,UGT1A4	640 (18)
PHF1	-0.913	transcription regulator		-1.406		0.000515	BBC3,HOXA10,HOXA11,HOXB9,HOXD10,HOXD8,MDM2,SFN,TP53	661 (17)
FOXF2	4.155	transcription regulator		-1.735		0.000515	ACTA2,ACTG2,CCND1,CDH1,FOXQ1,PDGFB,TAGLN,VIM,WNT5A	597 (13)
ERF	1.11	transcription regulator	Activated	2.345		0.000515	BCL11B,BNC1,CDH1,Col17a1,COL4A6,KRT5,ROBO2,TP63,WNT7A	338 (7)
ADAM17	-0.021	peptidase		0.365		0.000518	ADAM12,AREG,CCND1,DUOX2,FUT9,HES1,IL6,Ivl,LORICRIN,MMP7,Nppb,Saa3,SOX2,TNF,TNFRSF11B,WNT5A,WNT7A	580 (19)
TRAF3IP2	0.566	enzyme	Activated	2.38	bias	0.000518	CCL24,CCN2,CDH3,COL1A1,CXCL6,GATA3,ICAM1,IL33,IL6,ISG15,LCN2,MMP3,POSTN,Saa3,TNF,TP63,VCAM1	675 (16)
Map3k7	-0.583	kinase		1.075		0.000518	AR,Cxcl11,Cxcl9,GAS1,HAS2,IL6,ISG15,KRT14,LORICRIN,NFATC2,PROM1,SCD,SPHK1,TNF,TSC22D1,VCAM1,WNT11	677 (15)
cadmium chloride		chemical toxicant		-1.095		0.000518	AR,ARG1,CCND1,CDH1,DDIT3,FOS,Gsta4,GSTA5,IGFBP6,LPAR1,OCLN,Orm1 (includes others),PDGFB,SLC5A1,TNF,TP53,VIM	704 (19)
UCP1		transporter	Inhibited	-3.353		0.000522	ACOT2,AMD1,ANKRD1,ASNS,ATF5,CCDC136,Cd24a,CYB5R1,DDIT3,DKK3,EMB,EML1,FBXO32,GDF15,GOT1,GPX3,GREM2,GSTO1,IL6,MTHFD2,ODC1,PCK2,RAB40B,REEP6,SMTNL2,SOAT2,STBD1,TNF,TRIB3,TTLL7	578 (14)
EGR1	1.853	transcription regulator		1.155	bias	0.000523	Abcb1b,ACTA2,AR,ARC,AREG,CACNA2D4,CAV1,CCND1,CDH1,Cdkn1c,COL1A1,COL1A2,CXCL6,F3,FOSL1,GALNT3,GDF15,HPGD,ICAM1,ME1,MXD1,MYBL1,PDX1,PNPLA2,PPARG,Ppbp,RB1,TIAM1,TNF,TNFSF10,TP53,TP73,VCAM1,WNT4	694 (19)
MYB	1.835	transcription regulator		-1.04		0.000527	ACAP1,ADA,ADAM12,C3,CAMK2B,CCND1,CD34,CDH1,CDKN2B,COL1A2,COX6A2,CXCL6,GATA3,GRAP,ICAM1,IGFBP3,IGFBP5,IL18R1,IL1A,IL6,KITLG,LANCL3,LCN2,MMP11,MMP3,Ppbp,PTPN22,Serpina3g (includes others),SLC1A5,SOX2,SPHK1,VIM	711 (20)
CITED2	-1.612	transcription regulator	Inhibited	-3.635	bias	0.000539	ABTB2,ARG1,ARL4A,BCL9,BRDT,C3,CDKN2A,CDKN2B,Cxcl9,EGLN3,F3,GNG11,HLA-A,HOPX,ICAM1,Ifi47,IL13RA1,IL1A,IL1RN,IL6,ISG15,KIF5C,Klra7 (includes others),KYNU,Maml2,MRC1,MXD1,PLAC8,Pou3f1,SAT1,Serpina3g (includes others),SERPINB2,ST6GALNAC4,TMEM171,Tmsb4x (includes others),TNF,UBD,Zfp945	467 (14)
androgen		chemical drug		1.07		0.000554	ACE2,AKR1C3,AR,BDNF,BMP6,BTG2,CA12,CCND1,COL10A1,COL12A1,Crisp1/Crisp3,DNMT3B,ERBB3,FES,FGFR2,FOS,FOSL1,FUT9,GGT1,GJA1,IGFBP2,IGFBP5,PIK3R1,PSCA,SFRP2,SOX4,STEAP1,TMPRSS2,VNN1,WIF1,WNT5A	811 (22)
miR-125b-5p (and other miRNAs w/seed CCCUGAG)		mature microRNA		-1.83	bias	0.000554	ACSS1,ADAMTS1,APLN,ARG1,ARID3A,BMPR1B,CBX7,CDKN2A,ERBB3,GPR160,IGFBP3,IL1RN,IL6,JARID2,KRT19,PERP,PIGR,PROM1,SCD,TAFA1,TNF,TP53	844 (18)
mir-10		microRNA		-1.4	bias	0.000556	ALDH1A3,APC2,AR,ARG1,CDH1,EPHB2,ERBB3,FKBP5,FLVCR2,FOXA1,FZD8,GJA1,HOXD10,HTATIP2,IL6,LIFR,NOX4,PRDM1,PROM1,RB1,SLC1A5,TNF,TP53	773 (17)
wortmannin		chemical drug		-0.841		0.00056	ACTA2,AQP3,AR,BDNF,CCN2,CCND1,CDH1,CDKN2A,CDKN2B,COL1A1,COL1A2,DDIT3,DSG1,E2F2,ERBB3,ESR1,F3,FAM3B,FOS,GRIN1,HAS2,ICAM1,IL6,MSN,NT5E,PGR,POSTN,RB1,SLC1A1,SLC2A4,TNF,TNFSF10,TP53,TP63,VCAM1,VIM	756 (20)
heparin		chemical - endogenous mammalian		-0.73		0.000561	ACTA2,AREG,ARG1,CCND1,CNN1,COL1A1,EPHB2,F3,FOS,HAS2,ICAM1,IGFBP3,IL6,PAPPA,TFPI,THBD,TNF,VIM	688 (19)
XDH	1.174	enzyme		-1.071		0.000563	ACTA2,AVPR1A,CCN2,CEBPA,F3,PLAUR,PPARA,PPARG,TIMP2,TNF,VIM	698 (20)
CASP1	1.862	peptidase		1.27		0.000563	ACTA2,CDH1,COL1A1,IL1A,IL6,PPARA,PPARG,RIPK3,SCD,TNF,VIM	782 (16)
FOSB	-0.08	transcription regulator		-0.106		0.000563	BDNF,CCND1,CEBPA,F3,Flg,FOS,FOSL1,HPGD,LORICRIN,PPARG,SERPINB2	776 (20)
N-acetyl-L-cysteine		chemical drug		-0.992		0.000568	Abcb1b,ACTA2,ADORA2B,AQP1,AR,ATP1A3,AVPR1A,BMP2,C3,CAV1,CCN2,CCND1,CDH1,CLDN7,COL1A1,CTSK,DDIT3,FAM3B,FBXO32,FOS,GCLM,GJA1,ICAM1,IL1A,IL6,LTB4R,MRC1,NFATC1,NQO1,OSGIN1,PGR,PLAUR,PPARGC1A,SLC2A4,TAGLN,THBD,TNC,TNF,TNFRSF10A,TP53,VCAM1	681 (17)
isobutylmethylxanthine		chemical toxicant		0.736		0.000575	APLN,AREG,BDNF,CAV1,CCK,CCN2,CCND1,CD34,CEBPA,COL10A1,COL1A1,COL1A2,COL5A1,CRABP2,DGAT2,DHRS3,FOS,GRIP1,IDH1,IL13RA2,IL2RG,LGALS12,MMP3,NOTCH3,PDE3B,PGR,PPARA,PPARG,PPARGC1A,PTPRN,RB1,RXRA,SCD,THBS2,TIMP2,TIMP3,TNC	885 (22)
Jnk		group		0.167		0.000575	A2M,ACTA2,APLN,CCN2,CCND1,CDH1,CELF2,COL1A1,CXCL6,DDIT3,F2RL1,F3,FBXO32,FOS,GDF15,GJA1,HES1,ICAM1,IL1A,IL6,ITGB7,MMP3,MRC1,MRC2,NOX4,NQO1,OCLN,PDGFB,PLAUR,POSTN,RBP1,RXRA,TNF,TNFRSF10A,TP53,VCAM1,VCAN	703 (17)
TREM2	1.393	transmembrane receptor		1.413		0.000589	ARG1,ASB11,AXL,BAMBI,CTSE,DKK2,FABP5,IL1A,IL6,LGALS1,LOX,PPARG,PTK7,TNF,WIF1	619 (17)
pituitary adenylate cyclase-activating polypeptide		biologic drug		-0.283		0.000605	ADGRL2,ARHGAP32,BAMBI,CCND1,CRYAB,DPYSL3,EGLN3,FOSL1,MMD,Pvr,SLC41A2,WNT4
TSHZ3	0.927	transcription regulator		-0.076		0.000612	AMPD3,COL23A1,COL5A1,FMOD,FOSL2,HS3ST3B1,IGFBP3,KCNG1,NGFR,NTRK3,PODN,RAMP3,TSHZ2,ZNF616
RNF31	-0.357	enzyme		-0.775		0.000613	AREG,C8orf44-SGK3/SGK3,CCND1,CXCL6,Cxcl9,ESR1,GREB1,IGFBP4,IL13RA1,IL1A,IL1RN,IL2RG,IL31RA,IL33,IL6,KCNMA1,TNF	591 (18)
folic acid		chemical - endogenous mammalian		1.511		0.000613	ACTA2,ANGPT1,CDH1,COL18A1,COL1A1,DDIT3,FZD1,MSI1,NOX4,PTH1R,PTHLH,PYCARD,SFRP1,TP53,VCAM1,WNT4,WNT6	696 (20)
baicalin		chemical - endogenous non-mammalian		1.03		0.000619	BDNF,CBR1,COL1A1,HES1,IGFBP5,IL6,LCAT,MGST1,RBP1,TAGLN,TNF,TNFRSF11B,VIPR2	661 (18)
diethylnitrosamine		chemical toxicant		0.078		0.000626	Abcb1b,ACTA2,ALDH3A1,CCND1,COL1A2,CYP7B1,E2F2,EPCAM,FAM214A,GSTA5,GSTM5,IGFBP2,IL1A,IL6,KRT8,LCN2,LY6D,NQO1,PPARGC1A,PROM1,SELENBP1,TIMP2,TNF,TP53	686 (14)
MAP2K1	-0.418	kinase		1.882	bias	0.000632	ACTA2,ANKRD1,AREG,CCN2,CCND1,CDKN2A,CDKN2B,CEBPA,COL1A1,COL1A2,CRYAB,CSTA,ENO1,F3,FOS,FOSL1,GRIN1,IL13RA2,IL1A,IL6,JUP,MMP3,MPZ,NET1,NOS1,PLA2G4A,PLAUR,PTPN13,RAB38,TFPI2,TNC,TNF,TNFRSF10A,TNFSF10	667 (16)
FOXO4	0.741	transcription regulator		1.626		0.000632	ANGPT1,APLN,CAV1,CCN2,CCND1,CDKN2B,CH25H,EDNRB,FABP5,FMOD,FOXC1,GPX3,IDI1,IGFBP7,NRP2,OVOL1,Prg4,PRKAA2,SCD,SERPINB1,SESN3,SOX5,VCAM1	574 (14)
PTH1R	2.223	G-protein coupled receptor		0.404		0.000644	AR,CCND1,COL1A1,GALNT3,Mcpt1,MGP,PTHLH,SLC34A1,TNFRSF11B,ZNF521	445 (12)
ADIPOR1	-0.394	transmembrane receptor		0.837		0.000644	ARG1,ELOVL4,IL6,MMP3,PPARGC1A,PYCARD,REEP6,SLC2A4,TNF,TP53	691 (16)
NCOA4	-0.444	transcription regulator		0.625		0.000644	AR,CCN2,CDH1,CLDN3,CLDN7,EHF,FABP5,FGFR2,HOXD13,ST14	914 (15)
YAP1	0.395	transcription regulator		0.561	bias	0.000654	ACAT2,ACTA2,ADAMTS1,ANKRD1,AREG,ARG1,BMP2,BMPR1B,CAVIN2,CCDC80,CCN2,CCN5,CCND1,CDH1,CDKN2B,CEP85,COL1A1,DDAH1,DNMT3L,DOCK9,FBXO32,FOS,GDF15,HAL,ICAM1,IFIT1,IGFBP4,IL1A,IL6,KCNH2,LIFR,LOX,MAP1B,MRC1,MSLN,MYL9,Nppb,OCLN,PDE3B,PDGFB,PHACTR2,PLOD2,Rpl29 (includes others),SFN,SOX2,SYNE3,TAGLN,TNF,TP63,TP73,VCAM1,VIM	753 (19)
estradiol valerate		chemical drug		-0.147		0.000659	ESR1,ESR2,INHA,ITGB6,NGFR,PGR,TUBB4A	731 (16)
HOXC9		transcription regulator				0.000659	GLI3,HOXD10,HOXD11,HOXD13,TIMP3,WNT3A,WNT5A
DDX17	-0.085	enzyme	Inhibited	-2.186	bias	0.000659	CCND1,FOSL1,HTRA1,LCN2,MDM2,NET1,S100A4	625 (11)
KCNE3	0.928	ion channel				0.000663	ACE2,AKR1C3,BCAT1,CHKA,CHL1,CISH,Csprs (includes others),EPN3,FABP5,HSPA1A/HSPA1B,IL23R,JCHAIN,KCNK5,Mcpt2,OSGIN1,PRDM1
VDR	-1.076	transcription regulator		-0.468		0.00067	ACTA2,BMP2,CCND1,CDH1,CENPS/CENPS-CORT,CISH,Clec2d (includes others),COL10A1,COL1A1,Defb1,DOK1,DSG1,F3,GATA3,ICAM1,IGFBP3,IGFBP5,IL1A,IL1RN,IL6,ISG15,ITGB7,KLK13,KSR2,LGALS1,NFATC1,Nppb,NR1H4,ODC1,PDLIM2,PNPLA2,PPARG,PTPRF,RB1,SERPINB6,SLC34A1,SLC34A2,THBD,TMPRSS2,TP63,TPH1	660 (18)
SCAP	0.199	other		1.022	bias	0.000688	ALDOC,ASNS,ATF5,C5,DDIT3,EHHADH,FABP5,FADS2,FDPS,IDI1,MTHFD2,MVD,NSDHL,PCSK9,PTGER4,SCD,SPRR1A,STARD4,TRIB3	509 (13)
MDM2	-2.198	transcription regulator		0.143		0.000688	BBC3,CCND1,CDKN2A,CLIP3,ESR2,IGFBP6,IL13RA2,IL1RN,Krt10,KRT14,MDM2,POLK,SERPINB2,SFN,TNFSF10,TP53,TP63,TP73,ZNF365	706 (17)
miR-29b-3p (and other miRNAs w/seed AGCACCA)		mature microRNA		-1.115	bias	0.000688	ADAMTS14,CCND1,COL1A1,COL1A2,COL4A5,COL5A1,COL5A2,DNMT3B,FBN1,LOXL4,NID1,PDGFB,PIK3R1,PLOD2,PMP22,SHROOM2,TP53,VCAN,ZFP36L1	678 (17)
NR1H4	-7.99	ligand-dependent nuclear receptor		0.676		0.0007	Abcb1b,ACSS1,ACTA2,ATP8B1,BGN,C3,CDKN2A,CEBPA,COL14A1,COL1A1,COL1A2,COL5A2,CYP3A5,DDAH1,DPT,FABP5,FBLN5,FGF19,GCLM,Gsta4,GSTA5,GSTM5,IL6,LCAT,LCN2,MMP3,NDRG2,NR1H4,Orm1 (includes others),PDX1,PPARA,PPARG,PPARGC1A,RARRES2,RXRA,THBD,TIMP2,TNF	716 (18)
ALDH2	-2.338	enzyme		-1.066	bias	0.000707	ACTA2,ATF5,CCN2,COL1A1,GCLM,Gsta4,GSTA5,MTHFD2,SLC1A4	284 (7)
nilvadipine		chemical drug		-1		0.000707	ADA,CASP14,CBR1,CRYAB,GABRP,PDCD4,PRKCG,SYNGR1,Tpm2
CLDN7	5.698	other		-1.904		0.000707	ALDH3A1,C1S,C3,CA12,CCN2,CLIP4,F3,FADS3,FOSL1,FOXQ1,FZD2,IGFBP7,LGR4,LYSMD2,NETO2,PRKCZ,PRSS8,SCEL,SERPINB1,SLC66A3,SOSTDC1,SPRR3,TEAD2,TIMP2
HES1	3.355	transcription regulator		0.112		0.000708	ADAMTS5,BBC3,CCK,Cdkn1c,CEBPA,HES1,IL6,ISL1,MDM2,PAX5,PPARG,PTGDS,TAGLN,TPH1,TUBB3	632 (22)
PPP3R1	0.015	phosphatase		1.343		0.000708	ABCA13,ABCA5,AQP1,AQP5,ARID3A,ATP6V1C2,C5,CACNB2,CDHR2,PDE9A,PPARA,SCD,SHROOM2,SLC34A2,SLC8A1
Ap1		complex		1.326	bias	0.000709	BDNF,CCN2,CCND1,CDKN2A,CHRD,DDIT3,F2RL1,F3,FOS,FOSL1,GSTA5,HPGD,ICAM1,IGFBP3,IL1A,IL6,KCNN4,KRT18,KRT6B,MMP3,MMP7,Nppb,NQO1,PADI3,PADI4,PLAUR,PRDM1,Pvr,S100A4,SLC8A1,TNF,VCAM1	771 (21)
colistin		biologic drug		0.286		0.000722	ADRB1,AGMO,AK1,ALCAM,BMP6,CCND1,DAGLA,EPB41L2,FOS,GARNL3,Gm3383 (includes others),IGFBP5,LGALS1,MYO1B,NAV2,NPNT,NUAK1,PTGDS,PTPRZ1,SDC3,SOX4,TMC7
ISLR	0.302	other		1.65		0.000723	ANKRD1,CCN2,DLG3,FOS,FSTL1,FZD1,FZD2,PPP1R15A,SOX11,TEAD2,TEAD3	356 (7)
ezetimibe		chemical drug		0.456		0.000723	ACOX2,CEBPA,CH25H,COL1A1,FDPS,IDI1,MVD,PCSK9,PPARG,SCD,TNF	342 (11)
PARPBP	-0.424	other		-0.707		0.000725	AMD1,EMB,KRT18,KRT7,KRT8,PLOD2,TIAM1,TNC
CaMKII		complex		1.172	bias	0.000725	ARG1,BDNF,FOS,HAS2,PRKCZ,SLC2A4,SLC8A1,TP53	761 (22)
MFSD2A	3.168	transporter		-1.97	bias	0.000725	ALDOC,FADS1,FADS2,IDH1,IDI1,MVD,SCD,STARD4
ITGA11	8.951	other	Activated	2.795	bias	0.000725	ACTA2,CCN2,COL1A1,DES,IDI1,MMP3,NSDHL,TNC	462 (7)
TERF2IP	0.526	other	Activated	2.137	bias	0.000725	CA6,CCN2,GASK1B,GRIA3,HS3ST1,SMTNL2,TNF,TRABD2B
STEAP3	-0.789	transporter		-0.507	bias	0.000744	BMP6,CCN2,Cd24a,COL1A1,CYP1B1,FRMD5,LOX,MMP3,Nppb,PIK3R1,PLOD2,SORBS2,SORBS3,TP53	278 (7)
nitric oxide		chemical - endogenous mammalian		-0.216		0.000747	AR,BBC3,CCN2,CCND1,CDKN2A,DDIT3,DPYSL3,ECE1,FOS,GCLM,IL6,KRT14,MDM2,MGST1,NCAM1,NID1,Nppb,NQO1,ODC1,PGF,PPARGC1A,PRKG1,SERPINB5,SFN,TIMP2,TIMP3,TNF,TNFSF13B,TP53	706 (17)
HOTAIR		other	Activated	2.668		0.00076	ACTA2,CDH1,COL1A1,GDF15,GREB1,ICAM1,IL6,LAMB3,LAMC2,Nppb,RBM38,TP53	666 (19)
fasudil		chemical drug		-1.28		0.00076	ACTA2,ARG1,BMP2,CCN2,CDKN2A,F3,ICAM1,IL6,MRC1,TAGLN,TNF,VCAM1	593 (17)
PTHLH	2.898	other		1.65		0.000766	ADAMTS1,ANGPT1,AR,CCND1,Cdkn1c,CDKN2A,CDKN2B,COL10A1,CTSK,FOS,FOSL2,HSPA1A/HSPA1B,IL6,SMPD3,TGM1,TNC,TNFRSF11B,TP53	710 (27)
CEBPB	-0.058	transcription regulator	Activated	3.116	bias	0.000772	Abcb1b,ACTA2,AKR1C3,ANTXR1,APCDD1,APLN,ARG1,ASNS,BDNF,C3,CCND1,CD1D,CDH3,CDKN2B,CEBPA,CHIT1,COL10A1,COL1A1,COL1A2,COL5A2,CP,DDIT3,DGAT2,EDIL3,ENTPD2,EPHA7,FBLN1,FBXO32,FGFR2,FHL1,FOS,FZD1,GAS1,HAS2,HLA-A,ICAM1,IGFBP3,IGFBP4,IGKC,IL1A,IL1RN,IL6,KRT15,KRT18,KRT6B,LCN2,LEPR,Mcpt2,MGP,MMP11,MMP3,Mx1,NFATC2,ODC1,Orm1 (includes others),PLA2G4A,PLAUR,PPARA,PPARG,PPARGC1A,PPP1R15A,PRDM1,PRSS8,PTGFR,RORA,…	701 (19)
Agtr1b		G-protein coupled receptor				0.000781	CCN2,F3,FOS,SLC2A4,VCAM1	638 (20)
RASSF6	-1.821	other		0.391	bias	0.000781	BBC3,BTG2,CDKN2A,TP53,TP73	424 (7)
KRT16	7.017	other	Inhibited	-2.219	bias	0.000781	KRT6B,SERPINB4,SFN,Sprr2d,Stfa1 (includes others)
WNT5B	-0.993	other		1.091	bias	0.000781	ACTA2,CCND1,COL1A1,FOXN1,VCAN	361 (10)
MSH2	0.357	enzyme		-0.13	bias	0.000781	BBC3,CCND1,Ighg2b,IGKC,TP53	593 (12)
1,1-bis(3'-indolyl)-1-(4-trifluoromethyl-phenyl)methane		chemical reagent		-1.477		0.000781	AR,CAV1,GDF15,KRT18,TNFSF10	457 (7)
JNK-IN-8		chemical drug	Inhibited	-2.219	bias	0.000781	IL6,PROM1,SOX2,TNF,TNIK	717 (17)
hexamethoxyflavone		chemical toxicant		-0.898	bias	0.000781	ICAM1,IL6,SLC2A4,TNF,VCAM1	699 (22)
Raf		group		0.808		0.000787	AREG,CCND1,CDKN2A,FOS,FOSL1,GDF15,GRIN1,HAS2,KRT18,PPARGC1A,RND3,SEMA4C,SEMA6A,SLC43A3,TAGLN,TFAP2C	806 (22)
F3	4.443	transmembrane receptor		1.465	bias	0.000787	ANGPT1,AREG,ARG1,CCN2,DUSP9,F3,FOS,GJA1,ICAM1,IL6,MMP7,MSLN,PAK3,PODXL2,TNF,VCAM1	456 (16)
MYRF		transcription regulator		-1.584		0.000787	AKR1C3,CCDC149,CCN2,CEACAM1,COL14A1,GDF15,LOXL4,PLAUR,PRDM1,PWWP3B,RHOU,S100A1,SDSL,TENT5A,UAP1L1,ZAN
caffeine		chemical drug		-0.755		0.000787	BDNF,CAV1,CCN2,CDH1,CDKN2A,CEBPA,CTSK,EPAS1,F3,FOS,MICB,PPARG,PPARGC1A,TP53,TP73,VIM	646 (16)
echinomycin		chemical drug		-1.673	bias	0.00079	ADAMTS1,CAVIN2,EDN2,IL1A,IL6,MST1R	277 (7)
ARHGDIA	-0.364	other		-0.816		0.00079	AR,ESR1,ESR2,FOS,SCNN1A,SCNN1B	337 (12)
Insulin		group		0.197		0.000794	Abcb1b,APLN,BDH1,BDNF,CCK,CCN2,CCND1,CD34,CDKN2B,CEBPA,CNN1,COL18A1,COL1A1,COL1A2,COL5A1,COX6A2,CRABP2,CRYAB,DDIT3,DGAT2,EHHADH,ENPP2,EPAS1,FADS1,FADS2,FBXO32,FOS,FOXA1,FOXA3,GATA3,GPLD1,GREB1,HAP1,HES1,ICAM1,IDH1,IGFBP2,IGFBP3,IGFBP4,IGFBP5,IL13RA2,IL6,LEPR,LGALS12,LIFR,Marcks,Mcpt8,ME1,MMP3,MPZ,NOS1,NOTCH3,NR1H4,OCLN,ODC1,Orm1 (includes others),PCSK9,PGR,PIK3R1,PLCB1,PNPLA2,PPARA,PPARG,PPARGC1A…	808 (18)
LCN2	-4.291	transporter	Activated	2.237		0.000796	ARG1,ATF5,BMP2,CDH1,COL1A1,CXCL6,Cxcl9,ESR1,IL1A,IL1RN,IL6,MRC1,MSN,PPARGC1A,RXRA,SCD,TNF,TNFRSF11B,VIM	740 (17)
RBPJ	-2.709	transcription regulator		-0.106		0.000828	ACTA2,ARHGEF4,BMP2,BMP3,CCND1,Cdkn1c,CDKN2A,FGF11,FOS,FOXN1,GNAI1,HAS2,HES1,IL6,INHA,KITLG,MMP3,NFATC1,NTF4,PDGFB,PGF,PRDM1,PRSS3,RORC,SOX2,SOX4,TNC,WASF1,WNT5A	701 (20)
APOE	0.391	transporter		-1.778		0.000833	ACTA2,ADAMTS5,ADGRB1,ALOX12,BGN,CAMK1,CAV1,CCN2,CCND1,COL18A1,COL1A1,CREB3L1,CTNND2,CTSK,CYP3A5,DAGLA,DDIT3,ESR1,F2RL1,F3,FABP5,FKBP5,FOS,GATA3,GPX3,GRIA3,HSPA1A/HSPA1B,ICAM1,IGFBP6,IL1A,IL1RN,IL6,LCN2,LTC4S,MAP2,MGP,MMP3,MYLIP,MYO1B,NMNAT2,NOX4,NPNT,NQO2,PC,PCSK9,PMEPA1,PPARA,PPARG,PPFIBP2,PPP1R15A,TIAM1,TNF,Tpm2,VCAM1	593 (20)
TET1	0.518	enzyme	Activated	2.594		0.000844	ARC,FOS,FOXG1,ISL1,KHDC3L,KRT8,Meis1,PBX3,SFN,SOX2
SOX10		transcription regulator		-0.383	bias	0.000844	ACKR3,EDNRB,ERBB3,FOS,GDA,L1CAM,MPZ,NGFR,PMP22,PTN
GRN	-0.638	growth factor		-0.617		0.000844	ADAMTS5,ANGPT1,CCND1,DDIT3,FZD2,GBA,ICAM1,IL6,MMP17,TNF	613 (18)
L-glutamic acid		chemical - endogenous mammalian		0.951		0.000845	Abcb1b,ACTA2,BDNF,CCND1,CDS1,CLDN1,Defb1,FADS1,FADS2,FOS,GRIN1,IDI1,MAL,MAP1B,MAP2,NOS1,OCLN,PLA2G4A,PPARGC1A,PTGDS,SCD,SLC1A1,SLC27A1,SORL1,TNF,TP53	628 (17)
TFAP2C	6.662	transcription regulator		-1.244		0.000847	ADA,ALCAM,ANTXR2,CCN2,CDH1,ESR1,FOXA1,FOXC1,GREB1,GZMH,IGFBP5,KITLG,KRT8,LORICRIN,MAL,Meis1,SEMA3B	645 (13)
PF4	-1.13	cytokine		1.379		0.000847	ACTA2,Bmyc,CEBPA,CNN1,E2F2,F3,ICAM1,IL1A,IL6,ISG15,PGR,REL,SOX2,SPHK1,THBD,THPO,TNF	588 (19)
CXCR4	1.288	G-protein coupled receptor		-0.552	bias	0.000847	ACKR3,ANKS1B,AXL,C5,CCND1,CDH1,CDH11,F3,IGFBP7,IL6,PGR,TNFRSF10A,TNFSF10,TP53,ZBTB16	546 (15)
CASP8	-0.187	peptidase		-0.544		0.000899	BBC3,Cxcl11,Flg,FOS,Ifi202b,IL1A,IL33,IL6,ISG15,KRT14,LORICRIN,RPTN,Sprr2f,TNF	676 (15)
NKX3-1		transcription regulator				0.000899	AR,BTG2,CA12,CDH1,FES,FKBP5,FOS,IGFBP3,PIK3R1,RAMP1,SOX4,STEAP1,TMPRSS2,VNN1	658 (21)
NFKB1	0.609	transcription regulator		1.233	bias	0.000915	A2M,Abcb1b,ANKRD1,AR,ARG1,BAMBI,BMP2,BTG2,CCN2,CCND1,CEBPA,COL1A1,COL1A2,Cxcl9,EHF,ELF3,ENPP2,EPAS1,FOS,FSCN1,GATA3,GFRA1,GJA1,HAS2,ICAM1,IGFBP3,IGKC,IL1RN,IL6,ISG15,KRT6B,LAMB3,LGALS1,LTC4S,MDM2,MMP3,MMP7,Mx1,NFATC1,Saa3,SYTL1,TNF,TNFSF10,TP53,TRAF1,VCAM1	655 (12)
SREBF2	0.778	transcription regulator	Activated	2.402	bias	0.000918	ALDOC,AREG,CCN2,CYP7B1,FABP5,FADS2,FDPS,ICAM1,IDH1,IDI1,MVD,NSDHL,PCSK9,PDX1,PPARG,RARRES2,SCD,STARD4,VCAM1	712 (20)
FKHR		group				0.000919	A2M,CCND1,VCAM1
cetylpyridinium		chemical drug				0.000919	CTSK,FOS,NFATC1
PF-573228		chemical drug				0.000919	CDH1,LOXL1,TP63
NOP58	-0.491	enzyme				0.000919	CCND1,LTF,PGR
PSMC3	0.497	enzyme				0.000919	CDKN2A,FOSL1,TP53	665 (15)
mir-541		microRNA				0.000919	AR,PTPRN,PTPRN2
CDK5R2		other				0.000919	ARC,BDNF,FOS
LORICRIN	4.429	other				0.000919	RPTN,Sprr2d,Sprr2h
NECTIN1	3.902	other				0.000919	LORICRIN,RPTN,Sprr2d
capivasertib		chemical drug				0.000919	AR,PROM1,VIM	633 (10)
NSOP00313		chemical reagent				0.000919	ACTA2,COL1A1,PPARG
3,7-dimethyl-1-propargylxanthine		chemical reagent				0.000919	F3,FOS,TNF	457 (12)
H2AB3 (includes others)		other		1.387	bias	0.000935	AQP3,ARC,ATF5,BBC3,CHAC1,DHRS9,FOS,GAS1,ICAM5,LIPH,MSX1,PDZK1IP1,TMEM151B
mibolerone		chemical drug		-1.16		0.000944	ALCAM,ALDH3A1,AMD1,AQP5,AR,BMP6,CCDC80,CCND1,CEACAM1,COL1A1,COL1A2,DHRS3,F3,FDPS,FHL1,FKBP11,FKBP5,FOSL2,HLA-E,IGFBP3,ISYNA1,MAL,PRKCH,SMPDL3A,TIMP3,TMPRSS2	469 (7)
TRADD	0.538	other		0.437	bias	0.000952	AR,ICAM1,IL18R1,IL6,RND1,TNF,TRAF1,UBD,VCAM1	509 (12)
VGLL3	5.151	other		1.89		0.000988	ANKRD1,CCN2,COL12A1,COL1A1,COL1A2,MMP3,OSR2
HOXB9	-5.866	transcription regulator				0.000988	ANGPTL2,AREG,GLI3,HOXD10,HOXD11,HOXD13,NCAM1
Pde4		group		0.813		0.00102	CDH1,COL1A1,FDPS,ICAM1,IL6,KRT18,TNF,TP53	675 (20)
MPZ	3.293	other				0.00102	DDIT3,DERL3,MVD,PMP22,Pou3f1,PPP1R15A,SOX2,SOX4
FBXO32	2.796	enzyme		0.222		0.00103	ADSS1,ALDH1A3,BHLHA15,CKMT1A/CKMT1B,CSRP2,CXCL6,DKK2,GMPPB,HOOK1,IL6,ISYNA1,KRT19,MMP3,PRKCZ,RAB27A,SERPINB2,Tcf7,TFPI2
resveratrol		chemical drug		-1.001		0.00104	ACTA2,AR,BDNF,BMP2,CCND1,CDH1,CDKN2A,CTSK,CYP1B1,DDIT3,ECE1,EPHA1,ESR1,ESR2,F3,FOS,FOSL1,FOSL2,GATA3,GDF15,HAS2,ICAM1,IFIT1,IGFBP3,IL6,ISG15,MICB,MMP3,MRC1,NFATC1,NQO1,PDCD4,PDGFB,PDX1,PGR,PPARG,PPARGC1A,PPP1R15A,PRKAA2,SERPINB5,SPHK1,TGM1,TNF,TNFRSF10A,TNFRSF11B,TP53,TP73,VCAM1	787 (16)
ANGPT2	-0.331	growth factor		0.846	bias	0.00104	ACTA2,ADA,ADAM12,ARL4C,C1R,COL18A1,COL1A1,COL1A2,CRYAB,DDIT3,HSPA1A/HSPA1B,HSPA2,ICAM1,IL6,LEPR,MAPK12,MGST1,MMP7,NOX4,Nppb,PDCD4,PGAP1,POSTN,PPARA,PROS1,PTHLH,SCNN1A,SERPING1,SPTLC3,THBS2,TNF,TNIK,TP53,TUBB3,VCAM1,VIM	465 (17)
NRG1		growth factor		-0.126		0.00107	ANGPT1,ANKRD1,AR,AXL,BDNF,BIN1,CAV1,CAVIN2,CCN2,CCND1,CDH1,COL1A1,CXCL6,DDAH1,DDIT3,ELF3,ENO3,ERBB3,ESR2,FABP5,FOS,FSCN1,FSTL1,GDA,GPX3,HES1,IDI1,L1CAM,LIFR,LIMK2,Nppb,PDCD4,PGR,PLAUR,PMP22,PRKG2,SGSH,SH2D4A,SLC1A1,SLC2A4,SOX2,SOX4,VIM	671 (15)
IFT88	0.432	other		-1.394		0.00109	ACAT2,CEBPA,COL1A2,FDPS,IDI1,MVD,NSDHL,PGF,PPARG,TIMP3	630 (12)
IGF2BP1	9.595	translation regulator		1.976		0.00109	BCL11A,COL14A1,COL1A1,COL1A2,COL5A1,DDIT3,LGALS1,LUM,OCLN,TNC
Sb202190		chemical drug	Inhibited	-2.258	bias	0.00109	ACTA2,CCN2,CCND1,COL1A1,FGFR2,FOS,ICAM1,IFIT1,IL6,LORICRIN,PDX1,PGR,PLA2G4A,PPARA,PPARGC1A,PTHLH,RB1,TGM1,TIMP2,TNF,TNFRSF10A,TP53,TP63,VCAM1,VIM	790 (19)
Histone h4		group				0.00112	ADA,AFMID,BTG3,CCND1,CD1D,CDKN2A,ESR1,FOS,GAS1,HAS2,HES1,ICAM1,IL1A,IL6,KALRN,KIF1A,KIF5C,Mx1,NEURL1,PPARG,SFRP1,SPHK1,TAGLN,TBX15,TNF,TNFSF10,VCAM1	824 (22)
LRP1	-0.236	transmembrane receptor		-0.817		0.00114	C1R,C1S,CDH1,DDIT3,GLI3,GRIN1,IL6,MRC2,SERPINF1,SERPING1,SLC2A4,TNF,WNT5A	644 (19)
CDX1		transcription regulator		0.529		0.00114	ALDH3A1,B3GALT5,CCK,CCND1,CLDN1,CTSE,FOXQ1,FXYD3,HEPH,HOXB9,KCNJ15,KRT23,Muc1
ganciclovir		chemical drug		-1		0.00114	ARC,THBS2,TNF,TP53
CCAR1	-0.162	transcription regulator		1	bias	0.00114	CEBPA,EPAS1,PPARG,SPHK1	547 (12)
EN2		transcription regulator		1.154		0.00114	ALDOC,NGFR,PAX5,PLCB4
BCL2L12	-0.649	other		-0.152		0.00114	BBC3,CRYAB,Pmaip1,TNFRSF10A	569 (11)
miR-320b (and other miRNAs w/seed AAAGCUG)		mature microRNA		0	bias	0.00114	AQP1,AQP4,TAGLN,VIM
DNMT3L	2.227	transcription regulator				0.00114	Cdkn1c,EPCAM,MEST,Rhox5
TRPC3		ion channel		-1.982		0.00114	CCND1,JPH1,TRPC1,VCAM1	263 (7)
19,20-epoxydocosapentaenoic acid		chemical - endogenous mammalian		0.152		0.00114	ACTA2,CDH1,DES,S100A4	182 (4)
MTUS1	3.007	other		0.283		0.00114	CDH1,TNF,TP53,VIM
SF1		transcription regulator		-0.061		0.00114	ACTA2,CNN1,COL1A1,ICAM1
pirinixic acid		chemical toxicant		1.061		0.00115	ACAT2,ACOT2,ACOT4,AKR1C3,ALDH3A1,ALDOC,AQP3,ASNS,C3,C5,CCK,CCND1,Cd24a,CDKN2A,CEACAM1,COL1A1,CYP3A5,CYP7B1,EHHADH,F3,FABP5,FADS1,FADS2,FOXA3,GLCE,GNB4,GOT1,HLA-E,Hsdl2,IL1RN,IL6,JAG2,KRT8,LAMB3,LCN2,LIFR,LY6D,MEST,MPDZ,Nppb,NUDT7,Orm1 (includes others),PCK2,PCSK5,PCSK9,PDCD4,PERP,PIK3R3,POPDC3,PPARA,PPARG,PPARGC1A,PTPRF,PXMP4,RORA,RXRA,SCD,SLC27A1,SLC2A4,THRB,TIAM1,TNF,TP53,VCAM1	847 (23)
SAA		group		1.973	bias	0.00116	ARG1,F3,ICAM1,IL1RN,IL33,IL6,MRC1,Saa3,TFPI,TNF,VCAM1	575 (16)
pimagedine		chemical drug		-1.929		0.00116	ACTA2,CAV1,CCN2,CNN1,ICAM1,IL6,MDM2,NOS1,TAGLN,TNF,TNFSF10	660 (20)
histone deacetylase		complex		-1.463		0.00116	AFMID,CCND1,CD1D,CDH1,CDKN2A,NDRG2,PPARGC1A,PRSS8,SSTR2,TNF,TNFRSF10A	751 (25)
Wnt		group		-0.34		0.00117	ADAMTS5,CD34,CDH1,CEBPA,COL10A1,EDAR,GATA3,MPZ,MSX1,PPARG,PPARGC1A,SDC2	761 (22)
miR-200b-3p (and other miRNAs w/seed AAUACUG)		mature microRNA		-1.97	bias	0.00117	ACE2,BCL2L15,CDH1,EPCAM,FOXF2,KCNK1,LSR,MSLN,PERP,PTPN13,RNF128,VIM
FOXL2		transcription regulator		1.938		0.00119	BMP2,CDKN2A,CH25H,CXCL6,FOS,HMCN1,ICAM1,IL6,MYO6,NFATC2,OSR2,PPARGC1A,PPP1R15A,PTHLH,SERPINB2,SLC35F2,SMAD6,SOX4	643 (18)
lomustine		chemical drug		-0.775	bias	0.0012	A2M,A3GALT2,ASNS,CAPN6,CDCP1,CLDN4,CP,ELF3,EMP3,LAMC2,LCN2,PLA1A,Pvr,SLC34A2,VIM
arachidonic acid		chemical - endogenous mammalian		0.819		0.00121	AQP3,COL1A2,DDIT3,F3,FADS1,FADS2,FOS,FOSL1,IL6,MRC1,PLA2G4A,PNPLA2,PPARG,PRKD1,PTHLH,RXRA,SCD,SLC2A4,TNF,VCAM1,VIM	700 (21)
cyclophosphamide		chemical drug		1.664		0.00122	CAPN6,CDKN2A,CP,CXCL6,ELF3,FLT3,FOS,GPX2,HLA-E,ICAM1,IL18R1,IL6,KITLG,LAMC2,LGALS1,NGFR,ODC1,PLA1A,SLC34A2,TNF	735 (18)
oleic acid		chemical - endogenous mammalian	Activated	2.491		0.00122	AQP3,ARG1,ATF6,BBC3,CDKN2A,DDIT3,DGAT2,FABP5,FOS,GDF15,ICAM1,IGFBP3,IL6,LCN2,PNPLA2,PPARA,PPARG,PPARGC1A,RARRES2,RXRA,SCD,SLC2A4,SPHK1,TNF,VCAM1	630 (18)
ROCK1	-0.453	kinase		1.837	bias	0.00126	CCN2,CCND1,CNN1,COL1A1,COL5A1,FBLN2,FBN1,ICAM1,VCAM1	657 (21)
MDM4	-1.319	transcription regulator		1.505		0.00126	BBC3,CELSR1,KRT5,KRT8,MDM2,NKD2,TP53,VIM,WNT7A	724 (20)
YWHAZ	-0.043	enzyme		1.709		0.00126	ATF6,COL1A1,CTSK,FOSL1,IL6,MMP7,PPARG,TP53,TSC22D3	695 (19)
XAV939		chemical reagent				0.00126	CAMK2B,CRABP2,DES,DNMT3B,DSP,IGFBP2,JARID2,SLC2A4,SORT1
methylnitronitrosoguanidine		chemical toxicant		-0.541	bias	0.00126	BBC3,BTG2,CCND1,CEACAM1,CEBPA,GDF15,MDM2,TNFSF10,TP53	688 (18)
ethyl 2-{[(6,7-dimethyl-3-oxo-1,2,3,4-tetrahydro-2-quinoxalinyl)acetyl]amino}-4,5-dimethyl-3-thiophenecarboxylate		chemical reagent		-0.963	bias	0.00127	BBC3,FOXG1,MAP2,MDM2,TP53,TUBB3
PLAU	1.906	peptidase		-0.182		0.00128	ACTA2,ARG1,CCND1,F3,GDF15,GJA1,ICAM1,IGFBP2,IL6,MDM2,PLAUR,PTN,SERPINB1,TNF,TP53,VIM	767 (22)
fluticasone propionate		chemical drug		-0.235		0.00128	BGN,C3,C8orf44-SGK3/SGK3,CHIT1,FBLN5,FKBP5,FSCN1,GJB2,HPGD,HTRA1,IFIT1,IL1A,IL1RN,ITGB7,MMP7,OAS2,OLFML2B,PAPSS2,PCOLCE2,PLAC8,PPARGC1A,SERPINB2,SERPINF1,SLC29A1,SRPX,TFPI,TIMP3,TNFSF13B,TSC22D1,TSC22D3	664 (12)
GSTP1	-0.634	enzyme		-1.969	bias	0.00128	2810032G03Rik,Cxcl11,E230001N04Rik,ESR1,Fam13a,FKBP5,FUT9,GABRP,GPC2,IL20RA,IL31RA,ISLR2,KCNK2,Mill1,MMP7,NQO1,PAQR7,PGAP1,PRR9,PRSS16,RAB27A,SFRP2,SPIC,SULT4A1,Tchh,TEAD2,TMEM150C,TNF,TSC22D3,UGT1A6	317 (11)
SOX11	4.04	transcription regulator		1.97		0.0013	ADAMTS5,ASPN,BMP2,BPIFC,CAV1,CCND1,CP,EBF1,GRIN1,HS3ST1,IL6,KLK11,MPZ,MYO1B,NREP,NTN1,PAX5,POSTN,PRDM1,PTH1R,RNF122,TIAM1,TNXB,TP53INP1,TUBB3,WNT4	556 (9)
2-amino-5-phosphonovaleric acid		chemical - other		-1.056		0.0013	2610035D17Rik,ADAMTS1,ARC,B3GALT5,BBC3,BDNF,BSPRY,BTG3,CAVIN2,DKK2,DOK7,FOS,GFRA1,GRIN1,KCNK6,LHFPL2,MYCL,NPY1R,OLFM1,Pmaip1,RASGEF1B,SLC25A29,SPATA13,TSPAN18,WNT3A,ZNF750	372 (12)
IFNB1		cytokine		1.422		0.0013	Apol7e (includes others),AXL,CAPN2,Cd24a,CH25H,COL12A1,CRYAB,CTSK,CXCL6,CYP3A5,DKK3,FBLN2,FBN1,FOS,GAS1,GLIS2,GNB4,GPC4,GZMH,HLA-A,Hmga2,IDI1,Ifi47,IFIT1,Ifitm1,IL6,ISG15,Mx1,NFATC1,OAS2,OGN,PKP2,PRDM1,REL,RND3,SERPINB2,SIDT1,SLC39A14,STARD4,Tgtp1/Tgtp2,THBS2,TIMP2,TNF,TNFRSF10A,TNFSF10,Tpm2	680 (14)
LDLR	-0.089	transporter		-1.442		0.00135	ALCAM,ASPN,BGN,BMP2,CCND1,CEBPA,CYP7B1,DDIT3,DHRS9,ENPP4,F3,FABP5,FADS2,FDPS,GATM,GJA1,GPR132,ICAM1,IL12RB1,IL1A,IL1RN,IL6,LCN2,MVD,PCK2,PCSK9,PPARA,PPARG,PPARGC1A,PPP1R15A,SCD,SLC2A4,TNF,VCAM1,VCAN,VIPR1,VLDLR,WNT3A,WNT7A	765 (20)
methotrexate		chemical drug		0.554		0.00135	AK4,ALOX12,AMD1,BTG2,C1R,C3,C5,CCND1,CDH1,DGAT2,EHHADH,ENO3,ENTPD2,EPAS1,FA2H,FADS1,GSTA5,ICAM1,IGFBP3,IGFBP5,IL1A,IL6,MAP2K6,MDM2,NQO1,NR1H4,OCLN,PPARA,SCD,SERPING1,TIMP3,TNF,TNFRSF11B,TOB1,TP53,TP53INP1,UGT1A6,VCAM1,ZFP36L1	589 (15)
SUZ12	0.443	enzyme		-0.573		0.00136	ACKR3,CDH1,CDKN2A,DAB2IP,EPCAM,EPHA1,FBXO32,Flg,FOXA1,GAD2,HOXA10,HOXB2,HOXD10,IGFBP3,IRX3,KRT17,LAMB3,LAMC2,LORICRIN,MMP7,PGR,PLCB4,TBX3,TNFRSF11B,WNT3A	488 (13)
CYP19A1		enzyme		0.485		0.00137	AMIGO2,AR,BDNF,CCND1,ESR1,ESR2,FAM107A,FKBP5,GRIN1,HLA-A,HLA-E,IL6,PGR,PPARG,RB1,SLC2A4,SSTR2,TGM1,TM4SF1,TNF,TP53	829 (21)
allopurinol		chemical drug		-0.951		0.00139	A2M,A3GALT2,ADAMTS1,ASNS,BDNF,CAPN6,CDCP1,CLDN4,CP,ELF3,EMP3,F3,GPX2,LAMC2,LCN2,MRC1,PLA1A,Pvr,SLC34A2,VIM	699 (16)
PPIF	0.383	enzyme		0.688		0.00139	AMIGO2,ARHGAP22,BMP6,CHST1,Cxcl11,CXCL6,Cxcl9,HOXD8,Ifi202b,IL6,MEIS2,MGP,PDZRN3,Ppbp,PTN,Rpl29 (includes others),SFRP1,TNF,WNT5A	422 (7)
elaidic acid		chemical - endogenous mammalian		1.63	bias	0.00139	ACAT2,AOX1,CEBPA,DGAT2,DHRS3,FABP5,FADS1,FDPS,GNE,IDI1,IL6,LCN2,LIPH,NSDHL,PCSK9,SCD,SCNN1A,TFPI,VCAM1	467 (7)
zerumbone		chemical - endogenous non-mammalian		-1.233		0.0014	BBC3,CCND1,DDIT3,ICAM1,IL6,TNFRSF10A,TP53,TRAF1	467 (10)
WNT7A	6.159	cytokine		0.064	bias	0.0014	CDH1,ESR1,HOXA10,HOXA11,PLAUR,VIM,WNT4,WNT5A	592 (11)
vanillin		chemical - endogenous non-mammalian		-0.707		0.0014	CCN2,DNMT3B,FGFR2,FZD2,GCLM,HSPA1A/HSPA1B,TGFB1I1,TP53	301 (7)
1-palmitoyl-2-(5-oxovaleroyl)-sn-glycero-3-phosphorylcholine		chemical reagent		1.413	bias	0.0014	ACTA2,BMP2,ICAM1,IGFBP3,IL1A,IL6,PMEPA1,TNF,VCAM1,VIM	788 (24)
MEIS1		transcription regulator	Activated	2.086	bias	0.0014	C8orf44-SGK3/SGK3,EYA1,FLT3,FOS,HLF,HOXA10,IKZF2,Meis1,PBX3,TRIB2
TSH		complex		1.403		0.00141	CCND1,FOS,FZD1,GNAI1,IGFBP3,IGFBP5,IL1RN,IL6,KRT14,KRT5,LORICRIN,NOX4,SLC2A4,TNF,WNT5A	717 (20)
zoledronic acid		chemical drug		-1.234		0.00143	CDH1,CTSK,IL6,LPAR1,NCAM1,NOX4,PPARG,TNF,TNFRSF11B,TNFSF10,TP53,WNT5A	758 (16)
neomycin		chemical drug		-1.342		0.00143	ACTA2,Cxcl11,Cxcl9,HES1,HEYL,IL6,TNF	705 (21)
MFN2	0.474	enzyme		-0.378	bias	0.00143	ACTA2,COL1A1,DDIT3,IL6,PPP1R15A,SLC2A4,TNF	656 (19)
PTPN2	0.864	phosphatase		-0.651		0.00143	BCL11B,CCND1,Cxcl11,Cxcl9,PPARGC1A,PPP1R15A,PRDM16	718 (19)
S1PR2	-0.356	G-protein coupled receptor		1.165	bias	0.00143	ACTA2,F3,FOS,ICAM1,PDGFB,SPHK1,VCAM1	576 (18)
EMD	-0.048	other		-1.89		0.00143	BMP2,CRCT1,HOXA13,HOXD10,LORICRIN,SOX2,TGM1
POMGNT1	-0.068	enzyme		-1.982		0.00144	ACTA2,CLDN6,MMP17,MMP3,TIMP2
SPRY4-IT1		other		-0.065	bias	0.00144	CDH1,CLDN3,CLDN7,OCLN,VIM	568 (7)
P2RX4	-1.403	ion channel		0.896	bias	0.00144	BDNF,ICAM1,IL6,MMP3,TNF	662 (20)
TP53BP2	0.159	other		1.058		0.00144	BBC3,CCN2,CDH1,Pmaip1,VIM	677 (19)
IGKC	8.729	other				0.00144	ACTA2,CDH1,IL13RA1,IL2RG,IL6
S100P		other				0.00144	CCND1,COTL1,KRT18,KRT19,KRT8	413 (7)
PRKCH	2.801	kinase		0.254		0.00144	CCND1,KRT5,LORICRIN,PRKD1,TGM1
mito-TEMPO		chemical reagent		-1.342	bias	0.00144	ACTA2,DDIT3,IL6,Mx1,TNF	647 (17)
NCOA2	-0.363	transcription regulator	Activated	2.53		0.00144	AR,BMP2,C1R,C3,CCND1,CEBPA,CHST1,Cxcl11,Cxcl9,GPX3,GSTM5,GSTO1,HLA-A,IDI1,Ifitm1,IL1A,IL6,ISG15,KRT19,Mx1,NQO1,NSDHL,PARD6B,PGR,PPARG,RORA,TNF,TSC22D3	770 (23)
PP1		chemical drug		-0.095		0.00145	ANGPT1,CDH1,ESR1,FOS,GJA1,IL1A,IL1RN,ODC1,TAGLN,TNF,VCAM1	738 (19)
conjugated linoleic acid		chemical drug		-0.711		0.00145	CEBPA,CTSK,FOS,GDF15,IL1RN,NFATC1,PPARG,PPARGC1A,TNF,TNFRSF11B,TP53	752 (15)
TNIP1	-0.195	other		-1.442		0.00145	CCDC80,HLA-A,KLK14,KRT15,LCN2,PRSS27,RPTN,Saa3,SERPINB4,Sprr2e,TNF	383 (11)
Z-LLL-CHO		chemical - protease inhibitor		0.184		0.00145	AR,BBC3,CCN2,CCND1,CDH1,Cdkn1c,CDKN2A,CEBPA,CISH,CLDN4,CRYAB,CTNND2,Cxcl9,DDIT3,DDR2,DOK1,EPAS1,ESR1,FOS,GNAI1,HAS2,ICAM1,IL6,KCNH2,MMP11,MST1R,MSX1,NOTCH3,NOX4,NQO1,OCLN,ODC1,PDCD4,PGR,PPARA,PPARG,PRDM1,PRKAA2,PRKCZ,PTGFR,RB1,RXRA,SLC1A1,SLC27A1,SLC2A4,SORT1,TNF,TNFRSF10A,TP53,TP73,TUBB4A,VCAM1	745 (15)
MSTN		growth factor		0.909		0.00149	ACTA2,ALPL,BMP2,CEBPA,CTSK,DES,FBXO32,FOS,IGFBP3,IGFBP5,IL6,NFATC1,PPARG,PPARGC1A,TNC,VIM	854 (19)
Tnf (family)		group		0.357		0.00152	ADAMTS5,BBC3,CAVIN3,CCND1,CLDN4,CYP3A5,ENPP2,F3,FBXO32,GJA1,ICAM1,IL1A,IL33,IL6,ITGAE,JAG2,LAD1,LCN2,NOX4,NT5E,OCLN,PDGFB,Saa3,TACR1,TNFSF13B,TRAF1,VCAM1	655 (18)
S-nitroso-N-acetyl-DL-penicillamine		chemical reagent		0.526		0.00154	AQP5,DDIT3,HSPA1A/HSPA1B,MARCKSL1,MB,MST1R,NPR2,PPARGC1A,PRDM1,PRKG1,SLC2A4,TNF,TP53,TP73	556 (15)
butyric acid		chemical - endogenous mammalian		1.26		0.00156	A2M,ALOX15,AQP1,AR,ATP2B4,ATP7B,CCK,CCND1,CDH1,CDH11,CDKN2A,CLDN1,COL11A1,COL5A1,COL5A2,DNM1,DPP6,EMP3,ESR1,FES,FOS,FSTL1,GATA3,GGT1,GLI3,GRIN1,ICAM1,IFIT1,IGFBP3,IL18R1,IL6,INPP5J,ITGB7,JCHAIN,KRT13,MAPK13,MDM2,MMP7,MXD1,MYCL,MYH14,NEU3,NFATC1,NFATC2,OAS2,PAX5,PPARA,PPARG,PPARGC1A,PRDM1,PTGDS,PTPRN,RB1,RXRA,SAT1,SERPINB2,SLC2A4,TGM1,THBS4,THSD7A,TIMP3,TNF,TP53,WNT5A,ZFP36L1	701 (16)
ELAVL1	0.259	other		0.329		0.00158	ACTA2,CACHD1,CDH1,CEBPA,CLDN1,CLDN3,Csprs (includes others),Cxcl9,DCDC2,FAM83B,FOS,GATA3,GLIPR1,HLA-A,HSPA2,IL13RA1,IL6,JCHAIN,OAS2,PCOLCE,PDCD4,PIGR,PROM1,PTHLH,PTPRN2,RORC,SAT1,Tgtp1/Tgtp2,TMEM30B,TNF,TP53,TP53INP1,TP63,TSC22D3,VCAM1,VIM,WNT5A	690 (20)
FEV		transcription regulator		0.861	bias	0.00158	CNTN1,EPHA7,FOS,FOXA1,GCHFR,GPR176,GRIA3,HTRA1,ICAM1,LPAR1,NMNAT2,NTN1,SEMA3E,SLC6A4,TACR1,TPH1,VCAM1,VIM
FOSL1	-2.735	transcription regulator		-1.705		0.00158	ANKRD1,AXL,BDNF,CCND1,CDKN2A,CXCL6,DOCK9,FOS,FOSL1,HPGD,IL6,MAP1B,MMP3,PLAUR,PRDM1,SERPINB2,THBD,TNF	608 (17)
MECP2	-0.705	transcription regulator		-0.336		0.00158	ADAM12,ALOX12B,ARHGAP24,BDNF,CAMK2B,CDH1,CDKN2A,CDKN2B,DPYSL2,ENPP4,ESR1,FKBP5,FOXG1,GSTO1,IGFBP3,KCNF1,NPY1R,PROM1,S100A4,SRPX2,TFPI2,TIAM1,UNC5C,VIM	768 (21)
dimethyl sulfoxide		chemical drug	Activated	2.46		0.00158	Abcb1b,ADAM12,B3GNT8,BMP2,C1QTNF3,CYP3A5,DDIT3,EMP3,FOS,HEBP1,LCN2,LIFR,LOXL4,PDZD2,PTH1R,RAMP1,SMPD3,Tcf7,TNF,TNFRSF11B,VCAM1,VLDLR,WIF1,WNT3A	647 (17)
lithium chloride		chemical drug		1.672		0.00158	ACAT2,AR,BMP2,CACNA1G,CCND1,CTNND2,FDPS,FOS,FSCN1,GATA3,GDF15,HES1,HEYL,IDI1,Marcks,Naip1 (includes others),NKD2,NOTCH3,POSTN,PPARG,TAGLN,TNFSF10,TP53,VCAN	697 (16)
MYOCD		transcription regulator	Activated	2.899		0.00158	ACE2,ACTA2,CCBE1,CLSTN2,CNN1,COL1A1,COL1A2,DDIT3,DES,FBXO32,FOS,GJA1,MYL7,NFATC2,S100A4,SERPINB5,TAGLN,TP53,VCAN	151 (5)
GPD1		enzyme				0.00158	ACOT2,ADGRF1,ALPL,ASNS,CAMK2N2,CCND1,CPNE8,CRYBG2,CYP39A1,CYP7B1,FADS3,GSTA5,HAO1,KRT23,LIFR,NQO1,NUDT7,SERPINB1,VLDLR
ACOX1	0.771	enzyme		0.712		0.0016	ACOT2,ADAMTS1,Akr1c12/Akr1c13,CBR1,CTSE,CYP7B1,DDIT3,EHHADH,FAM214A,GOT1,GSDMC,HAL,IGFBP2,KRT23,KRT8,LCN2,LY6D,Orm1 (includes others),PALMD,Saa3,SELENBP1,SLC4A4,TNFRSF10A,TP53,TRIB3,UGT8	277 (7)
TLR4	-0.093	transmembrane receptor		1.811	bias	0.0016	AREG,ATF6,BAMBI,BMP2,C3,CDH1,CERK,CISH,CTSK,Cxcl11,CXCL6,Cxcl9,CYP3A5,DDIT3,DOCK11,DUOX2,F3,FBXO32,FOS,GJA1,HHEX,HTRA1,ICAM1,Ifi47,IFNE,IL1A,IL6,ISG15,LCN2,LRRK2,LTC4S,Mx1,NOS1,Nppb,NR1H4,PGR,PLA1A,PLA2G4A,PPARG,PRDM1,PTGFR,REL,RXRA,SERPINB5,SH3BP5,SIGIRR,SLC2A4,SLCO3A1,SMPDL3A,SPHK1,TNF,TNFRSF10A,TNFSF10,TRAF1,TSC22D1,TSPAN33,UGT1A1,VCAM1	763 (13)
ID3	0.406	transcription regulator		1.009		0.00165	BTG2,Cdkn1c,CDKN2A,E2F2,G6PC3,ICAM1,IGFBP4,IKZF2,IL17RB,IL6,IRF6,LEPR,LGALS1,MAP2K6,NFATC1,PIK3R1,PRDM1,PTPN13,PTPN22,REL,RORA,RPS6KA2,SOX13,SOX4,SOX5,TGFBR3,TNFSF10,TP53,TRAF1,TRAF3,VANGL2,VCAM1,ZBTB16	683 (15)
LPIN1	-1.143	phosphatase		0.275		0.00165	CEBPA,FDPS,IL6,MPZ,PPARA,PPARG,PPARGC1A,SCD,TNF	711 (23)
RPSA	-0.712	translation regulator	Inhibited	-2.357		0.00165	Ifi202b,Ifi47,IL1A,IL6,ISG15,Mcpt1,REL,TNF,TRAF1	686 (14)
CIP2A	0.417	other		-0.671		0.00166	ACTG2,CDKN2B,CRLF1,CRYAB,DSC2,E2F2,ENO3,LRP4,LUM,MFAP5,PLAUR,S100A16,SAT1,SCIN,SLC16A3
RHO		G-protein coupled receptor		0.277		0.00166	AQP1,ATF6,CACNB2,Cbr2,COL1A2,DDIT3,DPYSL3,FBLN1,FOS,NCAM1,NID1,NT5E,PCOLCE,SERPING1,TRPC1	360 (11)
EBF1	2.16	transcription regulator		1.308		0.00168	ADCY3,C8orf44-SGK3/SGK3,CBLC,CCL24,COL1A1,Cxcl9,EBF1,ESR1,GATA3,IGKC,IL12RB1,IL6,PAX5,PCK2,PDE3B,PIK3R1,PIK3R3,POSTN,Pou3f1,PPARG,PPARGC1A,PRDM1,PRKAA2,PTPRF,SCD,SFRP2,SLC2A4	759 (23)
paclitaxel		chemical drug		1.284		0.00169	ACKR3,ACTA2,ADORA2B,APC2,AREG,BTG2,CAV1,CCN2,CCND1,CELSR2,CXCL6,CYP1B1,CYP3A5,DDAH1,DDIT3,ENPP2,ENPP4,FOSL1,GDF15,GPR132,GRAMD1B,HLA-A,ICAM1,IGFBP3,IL6,KCNN4,MDM2,NFATC1,NREP,NT5E,PLAUR,PRSS22,RB1,SAT1,SERPINB2,SOX2,TFPI,TFPI2,THBD,TNF,TNFRSF10A,TP53,TP53INP1,TP73,TRAF1,TSC22D1,WNT4	644 (15)
5-N-ethylcarboxamido adenosine		chemical reagent		0.941		0.0017	ACKR3,ADORA2B,ARG1,BTG2,CCN2,CDKN2B,COL1A2,EPCAM,FOXA1,FZD1,IL6,MMP11,NT5E,ODC1,PROM1,SOX2,SPINT1,THBD,TNF,TNS2,VCAN,VIM	570 (15)
OLR1	0.698	transmembrane receptor		1.105		0.00174	CCN2,HAS2,HAS3,ICAM1,IL6,MMP3,NOX4,RBP1,RXRA,TGFBR3,TNF,VCAM1	754 (21)
RUNX3	0.262	transcription regulator	Inhibited	-2.627		0.00176	AKAP6,BBC3,CAPN6,CCN2,CCND1,CDH11,CEBPA,CHST3,COL12A1,FBN1,FSTL1,FZD2,ITGAE,LIFR,LOX,NUAK1,PAPPA,PCDH7,RNF150,SCARA3,SGCD,TIMP2,TNF,VIM	762 (23)
8-bromoguanosine 3',5'-cyclic monophosphate		chemical reagent		1.051		0.00177	BMP2,CAV1,CDK14,CYP3A5,FOS,INHA,PLAUR,SLC12A4,TP53,VCAM1	666 (21)
crizotinib		chemical drug		0.92		0.00177	AREG,CDH1,COL5A2,ERBB3,KRT14,OCLN,PPARGC1A,SCD,VCAN,VIM	791 (18)
TNFSF14		cytokine		1.548	bias	0.00177	ADORA2B,CDH1,Cxcl9,F2RL1,ICAM1,IL6,NT5E,POSTN,TNF,VCAM1	805 (19)
MIR124		group		-1.165	bias	0.00177	AR,CAV1,CEBPA,GRIA3,IL6,SPHK1,SRGAP1,TNF,TP53,VIM	603 (17)
miR-92a-3p (and other miRNAs w/seed AUUGCAC)		mature microRNA	Inhibited	-2.629	bias	0.00177	CCND1,CEBPA,EDNRB,IL6,MYLIP,NOX4,TBX3,TNF,TP63,VSNL1	517 (11)
mir-22		microRNA		-0.937	bias	0.00179	BMP6,BMPR1B,CDH1,ERBB3,ESR1,FOSL1,IL6,MECOM,TNF,TP53INP1,TP63	555 (18)
okadaic acid		chemical toxicant		0.546		0.0018	ALDH3A1,AR,BDNF,CCN2,CCND1,CRABP2,CYP1B1,ESR1,FOS,FOSL2,IL1A,IL1RN,IL6,KRT14,MMP3,ODC1,RB1,RXRA,TNF	690 (20)
cinnamaldehyde		chemical toxicant		0.83		0.0018	CCN2,DNMT3B,FGFR2,FOS,GCLM,HSPA1A/HSPA1B,NQO1,ODC1,PNPLA2,PPARA,PPARG,PRDM16,SLC2A12,SLC2A4,TGFB1I1,TNF,TP53,TRPA1	667 (14)
valsartan		chemical drug	Inhibited	-2.134	bias	0.00182	AQP1,AQP4,CD34,CEBPA,COL1A1,F3,FOS,GJA1,ICAM1,IL6,MRC1,POSTN,PPARG,TNF	774 (22)
15-deoxy-delta-12,14 -PGJ 2		chemical - endogenous mammalian		-1.445		0.00184	ACTA2,CCN2,CCND1,COL1A1,COL1A2,CSPG4,DDIT3,DES,DNMT3B,E2F2,EHF,ESR1,FOS,GCLM,GDF15,ICAM1,IL1A,IL6,ISL1,MMP3,MXD1,NOX4,Nppb,NQO1,PDX1,PLA2G4A,Podxl,PPARG,REL,RORA,SFRP2,SLC2A4,TFCP2L1,TMPRSS2,TNF,TP53,TUBB3,VCAM1	408 (15)
CHD7	-1.383	enzyme		1.452		0.00188	CDKN2A,GLI3,MDM2,NOTCH3,PERP,Pmaip1,RBPJ,TP53
HEXIM1	0.946	transcription regulator		-1.076		0.00188	ACE2,ANGPT1,BBC3,CCND1,COL1A1,Tmsb4x (includes others),TP53,VIM	771 (22)
CHD4	-0.02	enzyme		1.098		0.00194	1700048O20Rik,ARC,BCL11A,DUOX2,ELAVL2,LOX,MDM2,NGFR,NT5DC2,Pou3f1,RIPK4,RORC,SMOC1,TIMP2,TP53
CDKN2B-AS1		other		-0.128		0.00194	CDKN2A,CDKN2B,ICAM1,IL6,TNF,VCAM1	603 (13)
KLF17		transcription regulator				0.00194	CCL24,IL1RN,RB1,TNFSF10,TP53,VIM	445 (7)
Betacatenin/TCF		complex		0.728	bias	0.00194	ALPL,CCND1,DKK2,GJA1,MMP7,TNFRSF11B
NUP62	-0.544	transporter		1.63		0.00194	ADA,BBC3,EDAR,LORICRIN,PERP,ZNF750	464 (7)
APBB1	-3.014	transcription regulator		1.109		0.00194	ACTA2,CCND1,HES1,TAGLN,TP73,VLDLR	745 (22)
LPAR1	2.027	G-protein coupled receptor		0.915	bias	0.00194	CACNA2D1,CCN2,F3,IL6,PRKCG,SPHK1	604 (19)
TOPBP1	-0.285	other		-0.447	bias	0.00194	BBC3,CDKN2B,IGFBP3,MDM2,MMP3,Pmaip1	650 (15)
ENPP2	-5.169	enzyme		0.816		0.00194	ENPP2,IL6,PPARG,PPARGC1A,PRDM16,TNF	516 (11)
hydroxyflutamide		chemical drug		-0.354		0.00194	AR,IL1A,MSN,PGR,VCAM1,WIF1	537 (9)
NR5A2		ligand-dependent nuclear receptor		-0.858		0.00195	ACTA2,C3,C5,CCND1,Cxcl9,CYP7B1,FGF19,FOS,GATM,GOT1,HTRA1,ICAM1,IL1RN,IL6,INHA,KRT18,MMP3,MMP7,NR1H4,PGR,PTGDS,TNF,TNFSF10,TP53	755 (20)
corticosterone		chemical - endogenous mammalian		0.347		0.00196	ARC,ATP1B1,BDNF,CAV1,CCK,CCN2,CCND1,COL1A1,COL1A2,COL5A1,CRISPLD2,DDIT3,FKBP5,FOS,FXYD4,IL6,NOS1,NOX4,OCLN,PNPLA2,PPARG,PPARGC1A,SCD,SFRP1,TNF,TSC22D3	589 (22)
glucocorticoid		chemical drug		-1.653		0.00196	ACE2,ADRB1,ALDH3A1,APLN,BDNF,BMP6,CCN2,COL1A1,CRIP1,CYP3A5,DDIT3,FBLN1,FBLN2,GABRP,GOT1,GPX3,HAS2,ICAM1,IGFBP3,IL1A,IL1RN,IL6,KRT14,KRT17,KRT5,LAT2,MMP3,NOS1,ODC1,OGN,Orm1 (includes others),PIGR,PPARA,PPARG,PPARGC1A,PTHLH,SCNN1A,STX11,TACR1,TNF,TNFRSF11B,TP53,TSC22D3,VCAM1,VIPR1,ZBTB16	726 (15)
puromycin aminonucleoside		chemical reagent		-0.776		0.00196	A2M,A3GALT2,ADAMTS1,AQP1,ASNS,CAPN6,CDCP1,CLDN4,CP,CYP3A5,ELF3,EMP3,GPX2,LAMC2,LCN2,MRC1,NOX4,PLA1A,Pvr,SLC34A2,VIM	281 (7)
KLF15	-0.036	transcription regulator		1.098		0.00197	ACSS1,CCN2,DGAT2,EHHADH,FABP5,Nppb,PPARG,PPARGC1A,SCD,SLC27A1,SLC2A4,TNFSF10,VCAM1	562 (13)
3-methylcholanthrene		chemical toxicant		0.398	bias	0.00197	Abcb1b,CCND1,CYP1B1,FOS,GSTA5,GSTM5,ME1,NQO1,Orm1 (includes others),TNF,TP53,UGT1A1,UGT1A6	781 (19)
BHLHE40	1.023	transcription regulator	Activated	2.152		0.00202	ACTA2,ADGRG7,ADORA2B,AFF3,AK4,ATP1B1,AXL,BDNF,CAV1,Cd24a,Clca3b,Cmah,CNTN1,CP,CRABP2,Cxcl9,DAPL1,DDIT3,EGLN3,EPHX1,GDA,Ifitm1,IL12RB1,IL2RG,IL6,JCHAIN,KRT18,KRT8,LOX,LPAR1,LTB4R,MTHFD2,MXD1,NTRK3,PCDH7,PDPN,PIGR,PLA2G4A,PLAC8,RND3,SLC15A2,SLC16A3,SLC7A2,SORBS2,Tcf7,TENT5A,TNF,TP63	686 (16)
PLA2G4A	2.074	enzyme		0.239	bias	0.00202	Abcb1b,GSTM5,ICAM1,IL6,KRT18,PLA2G5,TNF	760 (20)
KCNJ10	0.193	ion channel		1.89	bias	0.00202	Cxcl9,FOSL1,ICAM1,Ifi202b,IGFBP2,Pmaip1,TGM1
bis(4-hydroxyphenyl)sulfone		chemical reagent	Activated	2.183		0.00202	ANGPTL2,CEBPA,ESR1,IL6,OLFML2B,PPARG,TNF	459 (8)
WWOX	0.515	enzyme		0.661		0.00202	BBC3,COL1A1,ESR1,IL6,TIMP2,TP53,TP73	685 (19)
S1PR1	0.003	G-protein coupled receptor		-0.65		0.00202	CCND1,GATA3,ICAM1,IL1A,IL6,TNF,VCAM1	564 (22)
RPA1	0.498	other		-1.329	bias	0.00202	FAM110B,FMOD,HSPA1A/HSPA1B,NAV2,RASSF10,SYT16,TANC2
DUSP5	-1.008	phosphatase		-1.134	bias	0.00202	ALDH1A3,CH25H,CRCT1,FAM83G,PRDM1,SERPINB2,SSTR2
YAP/TAZ		group		-0.277		0.00202	AREG,AXL,CCN2,GOT1,HSPA1A/HSPA1B,IL1A,IL6
PRKCA	-1.023	kinase		1.029		0.00204	ARL4C,BCL11A,CAV1,CCN2,CCND1,COL1A1,CSTA,FOS,GBA,GDF15,HES1,HSPA1A/HSPA1B,ICAM1,IFIT1,IGFBP3,MMP3,NQO1,PTPRN2,RB1,TNF,TP53,TRPC1,VCAM1	650 (18)
SLC25A13	0.82	transporter				0.00205	ACOT2,ADGRF1,ALPL,ASNS,CAMK2N2,CCND1,CPNE8,CRYBG2,CYP39A1,CYP7B1,FADS3,GSTA5,HAO1,KRT23,LIFR,NQO1,NUDT7,SERPINB1,VLDLR
CBFB	-0.832	transcription regulator		-1.525		0.00206	ARL4C,CDH1,CEBPA,DSP,GPLD1,HTRA1,ICAM1,IKZF2,ITGAE,ITGB6,KCNK5,LTB4R,OCLN,PDE3B,PPARG,PRRG1,PTGER4,TGFBR3
selumetinib		chemical drug		-0.69		0.00213	CCND1,ERBB3,FOS,FOSL1,FOSL2,LAMB3,PPARGC1A,TNFRSF10A,WNT7A	569 (17)
Rhox5	-7.001	transcription regulator		-0.051		0.00213	Anp32a,Cd24a,CPXM1,FZD2,PPARG,PPARGC1A,PTPRU,SCD,UNC5C	627 (13)
STS		enzyme	Activated	2.236		0.00213	HSPA1A/HSPA1B,IGFBP2,IL6,LTF,PGR,PNPLA2,PPARG,SLC2A4,TNF	593 (15)
QKI	-0.341	other		-0.597		0.00214	C1R,CAV1,CDH1,CNN1,MAP1B,MFAP5,NOS1,PPARGC1A,SCD,SOX2,THBS4,TNC,VCAM1,VIM	398 (7)
thapsigargin		chemical toxicant		-0.339		0.00215	ABCA12,Abcb1b,AR,ARC,ASB11,ASNS,ATF5,ATF6,BBC3,BDNF,CAPN5,CAV1,CCND1,CEBPA,CHAC1,CLDN4,COL1A1,CP,CREB3L1,DDIT3,ESR1,FOS,HSPA1A/HSPA1B,ICAM1,IL6,LIFR,PCK2,PDX1,PPP1R15A,SERPINI1,SFN,STARD5,TNF,TNFSF10,TP53,VCAM1	753 (22)
CDK2AP1	-0.38	other				0.0022	DIXDC1,FOSL1,FRAT1,FZD1,RHOU,SFRP2,VANGL2,WNT10A,WNT3A,WNT5A,WNT6	639 (13)
FASN	0.969	enzyme		0.18		0.00226	ACTA2,Aldh1a7,CAV1,CDH1,DDIT3,DGAT2,EDNRB,IL6,LRRK2,MRAS,PNPLA2,SCD,SFRP2,TNF,VIM	651 (22)
EFNA1	0.389	other		1.229		0.00226	ABCA12,CCN2,CRABP2,DSG1,EPHA3,FABP5,FOSL1,ITGB6,KRT13,KRT18,KRT4,NT5E,PKP1,PTHLH,TGM1	578 (11)
CLOCK	0.571	transcription regulator		-0.07		0.00227	AHNAK2,AK4,Alox12e,AVPR1A,CBR1,CCN2,CCND1,CEBPA,CHST3,CPD,CRISPLD1,DDIT3,DTX4,ESYT1,FAM107A,FKBP5,FOXA3,GALNT11,GJA1,GLIPR1,HAS2,ICAM1,IGFBP5,KCTD1,LGALS7/LGALS7B,MEST,MGP,MMP7,NPAS2,PPARA,RGS5,SCD,SCN4B,SERINC5,ST6GALNAC4,TAF9B,THBD,TSPAN4,WNK1,WNK4	656 (19)
POU2F2	0.559	transcription regulator		-0.243	bias	0.00232	ADA,Aldh1a7,ALDOC,BBC3,DACT3,DEPP1,DHRS9,DIXDC1,EBF1,ENO1,GATM,IGKC,IL6,KCNN4,PLEKHG1,SCD,SSTR2,TIMP2,ZDHHC23
TCF3	-0.372	transcription regulator		-0.114		0.00232	ADA,ALCAM,Aldh1a7,AREG,ARSA,ATOH8,BHLHA15,CD5,CDH1,CDKN2A,CDKN2B,CERK,Clec2d (includes others),COL1A1,CTSE,DAB2IP,EBF1,EPCAM,ESR1,FGFR2,FKBP11,FLT3,GATA3,GNE,GPLD1,HS3ST1,IKZF2,IL18R1,IL6,ITGB7,KCNN4,LY6D,MAL,NOTCH3,PAX5,PLAC8,PPARG,PRDM1,PRSS3,PTPN13,PTPRU,RORA,RORC,RXRA,SCIN,SEMA4A,SERINC5,Serpina3g (includes others),SERPINB1,SLC66A3,SNAI3,SOX13,SPO11,Tcf7,TMEFF1,TNF,TUBB3,VIPR2,ZBTB16	578 (21)
ZNF217	-0.29	transcription regulator		-0.653	bias	0.00232	CDKN2B,DPP6,EPHX4,ERBB3,IGFBP3,KCNK2,KRT18,MPZL2,MYO1B,NMNAT2,PAK3,PKP2,RGS20,SH3RF2,VSNL1,ZNF616
E. coli B4 lipopolysaccharide		chemical toxicant		1.639		0.00235	ADAMTS5,AMPD3,AQP1,ARHGAP30,C5,CA13,Clca3a1/Clca3a2,CLDN1,Csprs (includes others),CXCL6,CYP3A5,Defb1,EMB,ESR1,F3,FIBIN,FLT3,GLIPR1,GNAI1,HLA-A,ICAM1,Ifitm6,IL1A,IL1RN,IL33,IL6,LCN2,MRC1,Mx1,PANK1,PLA2G4A,PLAUR,Plscr2,PPARA,PROS1,PYCARD,ST6GALNAC2,TEX15,TNF,TNFSF10,TP53,VCAM1,ZNF616	514 (13)
MEF2C	1.124	transcription regulator		1.658	bias	0.0024	ACE2,ARC,BDNF,CCBE1,CLSTN2,COL10A1,COL1A1,COL1A2,CXCL6,DES,FOS,GJA1,IL6,MYL7,NFATC2,POSTN,PPARA,PPARGC1A,PTH1R,S100A4,SFRP2,SLC2A4,SLC8A1,VIM	739 (23)
4-hydroxyestradiol-17beta		chemical - endogenous mammalian		1.314	bias	0.00242	GSTA5,LTF,NQO1,PGR,SFRP2
PPP1R15B	-0.591	phosphatase		1.4	bias	0.00242	CHAC1,DDIT3,PPARG,PPP1R15A,TRIB3
Ctcflos		other		1.342	bias	0.00242	EBF1,PPARG,PPARGC1A,PRDM16,THRB
MYZAP	4.522	other		0.447		0.00242	DES,DSP,FOS,GJA1,Nppb	573 (10)
rosmarinic acid		chemical - endogenous non-mammalian				0.00242	ACTA2,BDNF,CCN2,IL6,TNF	807 (16)
zeaxanthin		chemical drug		1		0.00242	HAS3,HTATIP2,PRKAA2,RNF186,SLC25A30
theophylline		chemical drug		1.067		0.00242	FOS,HS3ST1,IL6,LGALS12,THBD	698 (22)
asparaginase		group				0.00245	ASNS,PDGFB,TNF,TP53	563 (14)
Sphk		group				0.00245	IL33,IL6,TNF,VCAM1	658 (22)
MRPS18B	-0.252	other		0.152		0.00245	ACTA2,SOX2,TUBB3,VIM
MIR9-1HG		other	Inhibited	-2		0.00245	CCND1,CDH1,OCLN,VIM
MED28	0.271	other		-1.023	bias	0.00245	ACTA2,ACTG2,CRIP1,TAGLN
TCIM	0.398	other		1.214	bias	0.00245	ICAM1,IL1A,IL6,VCAM1	463 (13)
CSRP3		other		-0.068		0.00245	DES,KRT18,KRT8,Nppb
NUDT16L1	0.564	other		1.177	bias	0.00245	ANKRD1,BBC3,IL6,MDM2
GNE	-2.624	kinase	Activated	2		0.00245	ASNS,CHAC1,DDIT3,TRIB3
DMTF1	-0.245	transcription regulator		-1.351	bias	0.00245	BBC3,CDKN2A,MDM2,TP53	569 (11)
EPRS1	-1.837	enzyme		1.969	bias	0.00245	ACTA2,COL1A1,COL1A2,LAMC2	328 (7)
Eda	2.808	other				0.00245	AREG,EPGN,PTHLH,WNT10A
ubiquinone 9		chemical - endogenous mammalian	Inhibited	-2	bias	0.00245	HSPA1A/HSPA1B,IL1A,IL6,TNF	681 (17)
IKZF1	0.548	transcription regulator		-0.604		0.00246	ANTXR1,AQP1,AXL,CAV1,CD34,CYP7B1,DEPP1,DNM1,DNM3,DOCK9,EBF1,EIF4E3,FLT3,FUT10,GATA3,HES1,IL18R1,IL6,JUP,KITLG,KRT79,LHFPL2,MAP2,MYO1B,NCAM1,NGFR,NOTCH3,NR1H4,PAX5,PROS1,PTH1R,S100A16,SEMA5A,SGSH,SH3BP5,SIPA1L2,Sult1a1,TNF,VIPR1	842 (21)
Nr1h		group		-0.011		0.00246	ADAMTS3,AQP3,ATP1B1,BMP6,C3,CAV1,CERS3,Cxcl11,ECE1,ELOVL4,IL6,LAT2,MARCKSL1,MPZ,MYLIP,PDX1,PPARGC1A,SCD,SFRP1,SLC2A4,SLC8A1,SYT7,TIMP3,TNF,TP53,VLDLR,ZBTB16	696 (22)
LHX2		transcription regulator		-1.671		0.00249	BDNF,COL1A1,EDN2,NQO1,OMP,RARRES2,ROBO1,ROBO2
MST1	-1.867	growth factor		0.32		0.00249	CCN2,CCND1,FOS,IL1RN,IL6,MST1R,SOX4,TNF	666 (20)
JARID2	2.407	transcription regulator		-0.379		0.00249	CCND1,CDH1,HOXD8,PPARG,PPARGC1A,RB1,TNF,TP53	616 (15)
Saa3	3.115	other		0.686		0.00249	BMP2,COL1A1,DMP1,MMP3,PTHLH,RAMP3,TNFRSF11B,WNT4
ADAMTS12	3.526	peptidase		-1.463	bias	0.00249	ALDH1A3,IL33,IL6,LCN2,LGALS1,MGP,MMP3,TAGLN
L 663536		chemical reagent		0.005		0.00249	DDIT3,IL6,LCN2,PDX1,PPARA,PPARG,RXRA,TNF	687 (19)
CXCL12	0.113	cytokine		1.868		0.00249	ACTA2,AKR1C3,ANKS1B,AXL,BMP2,BMP6,C5,CCND1,CDH1,COL1A1,CTSK,CYP3A5,DMPK,DOCK9,FOS,ICAM1,IGFBP7,IL1A,IL6,IRF6,MAPK12,MMP11,MMP3,PDX1,PGR,SORBS3,TNF,TNFRSF10A,TNFRSF11B,TNFSF10,TP53,VIM,ZBTB16	744 (20)
let-7		microRNA		-1.828	bias	0.00249	ACTA2,ADRB1,APC2,AR,ARID3A,BCAT1,BCL11A,BDNF,BTG2,CCND1,COL1A1,COL1A2,COL24A1,COL27A1,COL5A2,DZIP1,E2F2,E2F6,FOSL1,GPX7,GREB1,IGF2BP1,IGF2BP2,IL6,LRIG1,NQO1,NR1H4,PLAUR,PROM1,RBM38,S100A4,SCD,SLC1A4,SOX2,TMPRSS2,TNF,VIM	682 (21)
miR-204-5p (and other miRNAs w/seed UCCCUUU)		mature microRNA		-1.604	bias	0.00251	BMP2,BMPR1B,CAMK2B,CDH11,CHRD,EFNB1,FBN2,MICOS10-NBL1/NBL1,MMP3,PIK3R1,PPARG,PRKCG,SNAP25,SOX4
STAT5a/b		group		0.257		0.00253	ARG1,BMP6,CAVIN2,CCND1,CDKN2A,CISH,EBF1,ERFE,FOS,GATA3,IDI1,IL1A,IRAG2,LEPR,MMD,NETO2,PARVB,PAX5,PDGFB,Ppbp,PRDM1,RBP1,Tmsb4x (includes others)	615 (19)
cytochalasin D		chemical toxicant	Inhibited	-2.496	bias	0.00253	ACTA2,AQP5,CCN2,FOS,HOXB2,IL6,ITGA11,MMP15,SOX5,SOX6,TIMP2,TNF	703 (20)
PF543		chemical drug		-1.155	bias	0.00253	ACTA2,CCN2,CNN1,E2F2,GDF15,IL6,LOX,Nppb,Nxpe5,PLAC8,TNC,TNFRSF11B	471 (12)
tunicamycin		chemical - endogenous non-mammalian		-1.124		0.00255	ABCA12,Abcb1b,ACTA2,ASB11,ASNS,ATF5,ATF6,AXL,BBC3,CA6,CCND1,CDH1,CHAC1,DDIT3,DERL3,DGAT2,ERBB3,FKBP11,HCN2,HOOK1,ICAM1,IL1A,IL6,MFSD2A,MMP3,MVD,NAPB,PADI4,PCK2,PPARA,PPARG,PPP1R15A,PROM1,S100A4,SCD,SLC39A14,STARD5,TNF,TNFRSF10A,TP53,TRIB3,VCAM1	597 (16)
AICAR		chemical - endogenous mammalian		0.38		0.00255	ACTA2,ARG1,BBC3,CCND1,CDKN2A,CHST1,GATA3,GPX3,GSTM5,GSTO1,LCAT,MDM2,NQO1,PNPLA2,PPARA,PPARG,PPARGC1A,SCD,TNF,TP53	765 (19)
PPARD	1.608	ligand-dependent nuclear receptor		1.879		0.00258	ACTA2,ALDH2,AQP3,ARG1,BDH1,CCND1,Cdkn1c,CERS3,CFAP54,ENO1,FAM241B,GSTA5,ICAM1,IGFBP2,IGFBP6,IL13RA2,IL6,KYAT1,Mcpt1,MDFI,MFSD2A,MRC1,MYCL,Nppb,OAF,PCSK9,PNPLA2,PPARG,PPARGC1A,RBP1,SAT1,SCD,SERINC2,SLC27A1,SLC2A4,STBD1,TCEA3,TNF,TNFRSF11B,TP53,VLDLR	632 (19)
ZEB2	-0.813	transcription regulator		-1.487		0.00262	ALPL,AXL,CCND1,CDH1,CDKN2A,CDKN2B,ESRP1,ESRP2,GATM,KRT18,KRT19,SFRP1,Tcf7,VCAM1,VIM	734 (19)
NAMPT	-0.196	cytokine		1.216		0.00267	AXL,BDNF,E2F2,IL6,MMP3,NPY1R,PPARGC1A,TFPI,TNF,TP53,WNT5A	596 (17)
DMP1	3.773	other		0		0.00267	ADAMTSL2,ALPL,BMP2,Cbr2,CDKN2A,ELAVL2,EPCAM,GPR84,IL6,PIANP,SMAD6	216 (7)
COMMD3-BMI1	0.168	transcription regulator		-0.695		0.00267	CDKN2A,CDKN2B,EBF1,FOXA1,Hmga2,HOXA10,HOXA13,HOXB9,IL6,LCN2,WNT5A
fluoxetine		chemical drug		-0.419		0.00269	ARC,BDNF,DEPP1,FGFBP1,FOS,GNAI1,IL6,KCNK2,NOS1,PDE4A,SLC6A4,TAGLN,TPH1,TSPOAP1,VGF,WNT3A,ZNF326	737 (22)
EIF4EBP2	0.009	translation regulator	Inhibited	-2.297	bias	0.00271	ARG1,CEBPA,Cxcl11,IL1RN,IL6,PNPLA2,PPARG,SERPINB2,TNF	481 (10)
lipoxin A4		chemical - endogenous mammalian		-1.125		0.00275	ACTA2,CCND1,ESR1,GREB1,ICAM1,IL6,LIMK2,PGR,TIMP2,TNF	713 (19)
GJA1	2.427	transporter		0.787		0.00275	BMP2,CCND1,CDH1,CDKN2A,GJA1,GJB2,ICAM1,TNF,TNFRSF11B,VIM	781 (18)
eprenetapopt		chemical drug		1.816	bias	0.00275	BBC3,CARD10,CDH3,GJA1,GJB6,IGFBP7,KRT14,KRTDAP,LIMK2,SCNN1A	446 (7)
SPARC	1.018	other		-0.974		0.00276	ACOT2,AKR1C3,CDH1,CDH3,CDYL,CLDN1,CLDN4,COL1A1,COL1A2,FOXQ1,HES1,IL6,LOXL4,MAP2,SLC34A2,SPRR1A,TBX3,TMC5,TMEM45A,VIM,WNK4	673 (21)
nitrofurantoin		chemical drug		-0.811		0.00277	A2M,ADAMTS1,AMD1,ASNS,BTG2,C3,CAPN2,CAPN6,CCND1,CP,DDIT3,EHHADH,FETUB,GPX2,GSTA5,IGFBP3,IL6,KRT19,LCAT,LOX,NQO1,NR1H4,ODC1,SELENBP1,SLC34A2,TIMP3,TP53,VCAM1
SRA1	-0.112	transcription regulator		1.706	bias	0.00278	CAV1,HES1,PPARA,PPARG,PRDM16,SLC2A12,TMPRSS2	810 (21)
miR-31-5p (and other miRNAs w/seed GGCAAGA)		mature microRNA		-1.859	bias	0.00278	BAMBI,CDKN2A,KRT14,KRT16,KRT17,PDGFB,SATB2
MGLL	1.095	enzyme		1.706		0.00278	IL1A,IL6,PNPLA2,PPARA,PPARG,PPARGC1A,TNF	556 (17)
BACE1	-1.384	peptidase		-1.504		0.00278	CACHD1,CHL1,CNTN2,GPC4,MDGA1,NT5E,SEMA4A
ADM2	-1.337	other		0.293	bias	0.00278	ARG1,FOS,IGFBP3,MRC1,MTUS1,PPARGC1A,TBX15	535 (13)
isoproterenol		chemical drug		-0.957	bias	0.00282	ACTA2,ADRB1,ALOX15,APLN,AQP4,AQP5,ATP7B,CAV1,COL1A1,CYP1B1,DHRS3,FOS,FOSL1,FOSL2,IL6,LGALS12,NOS1,Nppb,ODC1,PDGFB,PNPLA2,RAB27A,RGS5,SCD,TGFBR3,TIMP2,TNF,TNXB,TUBB3	813 (25)
ORAI1	-0.005	ion channel		-0.186		0.00285	AQP5,C5,CTSK,IL6,NFATC1,TNF	676 (20)
PMP22	-3.027	other		0.52		0.00285	CSPG4,EMP3,MPZ,NGFR,PMP22,SOX2
KLF9	-0.087	transcription regulator		-0.577		0.00285	BMP2,CCND1,COL1A1,ESR1,HOXA10,PGR	699 (17)
PFKFB3	1.016	kinase		0.121		0.00285	EPAS1,ICAM1,IL6,PDGFB,TNF,VCAM1	678 (17)
10-nitrooleate		chemical - endogenous mammalian		-0.816	bias	0.00285	ICAM1,IL6,NOX4,PPARG,TNF,VCAM1
DGAT1	0.215	enzyme		0.816		0.00285	DDIT3,DGAT2,PNPLA2,PPARA,PPARG,VLDLR	768 (23)
101.10 peptide		chemical reagent	Inhibited	-2.425	bias	0.00285	GJA1,IL1RN,IL6,MMP3,PTGFR,TNF	558 (12)
2-(4-amino-1-isopropyl-1H-pyrazolo[3,4-d]pyrimidin-3-yl)-1H-indol-5-ol		chemical reagent		0.955		0.00286	ADAMTS1,ADGRL2,ANKRD1,ARHGEF4,ATP6V0E2,BBC3,BMP2,C1R,C1S,CCN2,CCNB1IP1,CCND1,CDH1,CXCL6,CYP1B1,DEPTOR,E2F2,EDN2,FOSL1,FOXC1,GJA1,GREM2,HAS2,IL1RN,MTHFD2,NUAK1,PDLIM2,PMEPA1,PPP1R15A,SERPINB1	708 (18)
SPP1	-0.586	cytokine		-0.297		0.00289	ANGPT1,ARG1,CCND1,CDH1,COL1A1,CXCL6,CYP39A1,DSP,EPDR1,FGFR2,FOS,HAS2,HTATIP2,ICAM1,IL1A,IL6,KRT18,LOX,MMP7,NDRG2,OCLN,PIK3R1,PPARG,RB1,S100A4,SEMA6C,SERPINF1,SLIT1,TNF,TP53,VIM	631 (18)
NOS2	-0.48	enzyme		0.516		0.00289	ALDH3A1,AR,CALML5,COX6A2,CP,Cxcl9,GJA1,IL1RN,IL6,ISG15,KRT13,KRT4,LCN2,LORICRIN,LPAR1,MB,Orm1 (includes others),PC,PERP,PIGR,PPARGC1A,RPTN,Saa3,SLC1A5,SLC2A4,SPRR3,Tcf7,Tgtp1/Tgtp2,TNF,TNFSF10,TNFSF13B	749 (14)
KDM5B	1.968	transcription regulator		-0.858		0.00294	CAV1,CCN2,CCND1,CLDN1,DDIT3,Elf5,ERBB3,ESR1,FABP5,FGFR2,FHL1,FOXA1,GJB2,GREB1,IGFBP2,ISG15,ISL1,LIMCH1,PDE3B,PGR,SAT1,SCNN1A,SMARCA2,WNT3A	376 (7)
TRPS1	1.695	transcription regulator		-0.8		0.00302	ALPL,BMP2,DPEP2,GALNT3,GREB1,KCNMA1,Ptprd,RAMP1,SEMA6A,SERPING1,SMPD3,SOX2
PLK1	-0.209	kinase		0.927		0.00302	ACKR3,ACTA2,ANKRD1,BBC3,CDH1,ESR1,MDM2,PIK3R1,PYCARD,SFN,TGFB1I1,VIM	687 (17)
ADRA1A		G-protein coupled receptor				0.00302	ADAM12,ARC,BDNF,CSRP2,DDAH1,FABP5,FOS,IL6,LOX,MMP7,PRRX1,PTHLH	551 (18)
ziritaxestat		chemical drug		0		0.00302	ADAMTS5,AKR1C3,ALDH1A3,AMIGO2,CCN2,DERL3,IFIT1,LPAR1,OAS2,STON2,TAGLN,TNFSF10
lenalidomide		chemical drug		0.735		0.00304	ANTXR1,AUTS2,BCL11B,CAV1,CCND1,CEBPA,DEPP1,DNM3,DTNA,ELF3,ENO1,FKBP11,FZD2,GALNT18,HS3ST3B1,KCNMA1,LHFPL2,MAP2,MB,NETO2,NFATC1,PLOD2,PPP2R1B,PROS1,REL,RORC,S100A16,SEMA5A,SIPA1L2,SLC7A2,TCF7L1,TNF,TNFSF13B,TP73,TREX2,VIM,WNT10A,WNT11,WNT4	715 (20)
ZFPM1	-0.579	transcription regulator				0.00307	CEBPA,CPD,EPHA7,GATA3,HEBP1,IKZF2,IL2RG,IL31RA,ITPKB,Mcpt8,MMD,PTPN22,SCIN,SH2D4A,SLC6A4,XK
nifedipine		chemical drug		-0.361		0.00307	ATP2B4,BDNF,BMP2,CYP3A5,FAM3B,FOS,IGFBP5,IL1A,IL6,NOS1,POSTN,SERPINB2,SLC2A4,SLC8A1,TNF,VCAM1	624 (18)
BCL6	0.161	transcription regulator		-1.069		0.0031	A2M,ACAT2,ALCAM,ARG1,BMP2,CCND1,CDKN2A,CGAS,CISH,COL1A1,CPD,CTSK,DPYSL2,EHHADH,EPB41L2,FMOD,GATA3,GSTM5,IL13RA1,IL1A,IL6,KLHL23/PHOSPHO2-KLHL23,MGP,MRC1,NFATC1,PDCD4,PLA2G4A,Pmaip1,PRDM1,RORC,SH2D4A,SLC39A8,SOX5,SOX6,TACSTD2,TNF,TP53	700 (20)
OGT	-1.011	enzyme	Inhibited	-2.573		0.0032	CCND1,CDH1,CLCA2,DNM3,DTNA,DUOXA1,FOS,IGFBP2,IL6,JUP,KRT18,MDM2,MGAT5B,NGFR,PPARGC1A,TNC,TNF,TP53,VIM,WIF1	675 (19)
estriol		chemical - endogenous mammalian	Inhibited	-2.72	bias	0.00323	Cxcl11,CXCL6,Cxcl9,HOXA10,HOXA11,IL1RN,IL23R,IL6,PIK3R1,SDC3,TNF	676 (15)
Ro31-8220		chemical drug		0.73	bias	0.00323	CLDN1,COL1A1,COL1A2,DDIT3,ICAM1,IL6,MDM2,PDCD4,TNFSF10,TRAF1,VCAM1	522 (18)
NOTCH4	-0.757	transcription regulator	Activated	2.224	bias	0.00324	ACTA2,ANGPT1,Cdkn1c,CNN1,DES,HES1,RGS5,TAGLN
mir-148		microRNA	Inhibited	-2.784	bias	0.00324	ACTA2,ALCAM,AQP4,COL1A1,DNMT3B,IL6,MMP15,TNF	389 (7)
EPCAM	6.825	other		1.192		0.00324	CCND1,CDH1,EPCAM,FABP5,FOS,FOSL1,SOX2,TP53	667 (19)
TRPV4	0.202	ion channel		1.604	bias	0.00324	AQP5,CXCL6,FOS,IL6,PPARGC1A,Saa3,TNF,VCAM1	697 (25)
Mt1	-0.699	other		-1.274	bias	0.00324	CCND1,CEBPA,FOS,Gstt1,IL6,MEST,RORC,TNF	462 (14)
GW3965		chemical reagent		1.315		0.00327	ADCY3,CAV1,CH25H,DGAT2,DHRS9,FABP5,FADS2,FDPS,GATM,GNAI1,GNG11,IL1RN,IL6,MVD,MYLIP,PPP1R15A,PRKG2,SCD,SLC2A4,TNF,VIPR1,VLDLR	530 (12)
tyrphostin AG490		chemical drug		-0.579	bias	0.00332	A2M,ACTA2,AKR1C3,CCN2,CTSK,DUOX2,ENPP2,ESR1,ESR2,FOS,HPGD,ICAM1,IL13RA2,IL6,ITGAE,OCLN,TAGLN,TNF,TNFSF10	713 (20)
phytohemagglutinin		chemical drug	Activated	2.147	bias	0.00334	ALDH2,AQP4,ARSB,C5,CACNB2,CAP2,CDH11,CGAS,COL18A1,COL1A2,COL4A5,FBN1,FOS,FOSL2,FOXA3,GATA3,GGT1,GNAI1,GPLD1,HPGD,ICAM1,IL2RG,IL6,KCNN4,KRT13,LCAT,MAP1B,MEIS2,MMP11,NCAM1,NT5E,PAX5,PGF,PRKD1,PTPN22,RB1,RXRA,SOX4,SPHK1,TFPI,TIMP3,TNF,TNFSF10,TRAF1,VIPR1	770 (18)
HDL-cholesterol		complex		0.632		0.00338	CHAC1,DDR2,DEPTOR,FOSL2,GPC6,HDGFL3,IDI1,NUDT7,TRIB3,VLDLR
IRF2BP1	0.079	transcription regulator				0.00338	ADAMTS1,EPGN,FAM83G,FOS,HOXD10,IL6,OSR2,SBK3,SESN3,TNFRSF11B
ALOX15	8.109	enzyme		0.234		0.00338	ALOX15,FOSL1,ICAM1,IL1A,IL6,Muc1,NOTCH3,PPARG,TNF,VCAM1	614 (18)
miR-1-3p (and other miRNAs w/seed GGAAUGU)		mature microRNA	Inhibited	-2.25	bias	0.0034	AGRN,ANKRD29,AXL,BDNF,CDCP1,CDK14,CHST11,EPB41L4B,ESR1,FAM81A,FBLN2,FSTL1,GJA1,MMD,MRC2,MTHFD2,NETO2,NOTCH3,PDCD4,PTPRF,RBM47,SERPINB5,SH2D4A,SLC16A9,SLC25A30,SPHK1,TIMP3,Tmsb4x (includes others),TNS4,TSPAN4,UST
WNT4	5.861	cytokine		0.57	bias	0.00341	BMP2,CCND1,CDH1,FKBP5,FOXN1,GAS1,GJA1,PARD6B,WNT6	631 (15)
NRXN1		transporter				0.00341	CLDN6,COL4A6,EPHA7,FBLN5,FLRT2,ITGA7,MGP,TAFA1,TNC
DNMT1	0.033	enzyme	Inhibited	-2.378		0.00341	BMPR1B,CDH1,Cdkn1c,CDKN2A,EPDR1,ESR1,FBN1,FOXA1,FOXF2,PPARG,PRDM16,PTN,PYCARD,SERPINB2,SFRP2,TIMP3,VLDLR,WNT5A	822 (24)
1-methyl-2-pyrrolidinone		chemical drug				0.00341	CTSK,FOS,NFATC1
sucralose		chemical reagent				0.00341	CEBPA,PPARG,SLC5A1	222 (6)
NR2F1-AS1		other				0.00341	CCND1,CDH1,VIM
GLIPR2	0.136	other				0.00341	ACTA2,CDH1,VIM
LEO1	-0.23	other				0.00341	Meis1,SOX2,SOX4
HHIP	-7.579	other				0.00341	EBF1,HHIP,PAX5	282 (7)
PF-4691502		chemical drug				0.00341	BBC3,PROM1,VIM	436 (7)
FGD5-AS1		other				0.00341	CDH1,RORA,VIM
CLIP1	0.428	other				0.00341	ICAM1,IL6,TNF	555 (15)
ARID1B	0.285	transcription regulator				0.00341	ALPL,ARC,FOS
UBE2K	0.505	transcription regulator				0.00341	ACTA2,COL1A1,UBD
Bc1		translation regulator				0.00341	ACTA2,CNN1,TAGLN	391 (7)
miR-515-5p (and other miRNAs w/seed UCUCCAA)		mature microRNA				0.00341	FGFR2,SPHK1,TCF7L1
miR-516a-3p (and other miRNAs w/seed GCUUCCU)		mature microRNA				0.00341	AR,WNT3A,WNT5A
mir-431		microRNA				0.00341	CD34,EHF,VCAN
miR-370-3p (and other miRNAs w/seed CCUGCUG)		mature microRNA				0.00341	GAD2,PTPRN,WNT7A
miR-625-5p (and other miRNAs w/seed GGGGGAA)		mature microRNA				0.00341	EPAS1,IGF2BP1,NTRK3
PPP1CC		phosphatase				0.00341	BDNF,IL6,TNF	709 (17)
PDGFRbeta-recognizing cyclic peptide		chemical reagent				0.00341	ACTA2,COL1A1,COL1A2
tyrphostin AG 18		chemical drug				0.00341	AKR1C3,IL6,TAGLN	404 (14)
BACH2	0.411	transcription regulator		-1.754		0.00341	CDKN2A,EGLN3,GATA3,IL6,ITGAE,MYCL,PDE3B,PRDM1,RORC,S100a2,SPIC,TIGIT,TNF,TP53	757 (21)
mitomycin C		chemical drug		-0.783	bias	0.00341	ATF6,BTG2,CCND1,DDIT3,ITPRIPL2,MDM2,NQO1,PPP1R15A,PYCARD,TBC1D24,TP53,TP53INP1,TP63,ZMAT3	538 (15)
GLI2	0.837	transcription regulator		0.749		0.00343	BNC1,CCL24,CCND1,CDH1,COL10A1,CSTA,CXCL6,GATA3,HHIP,IL6,IRF6,JAG2,KRT17,MMP3,NTN1,OVOL1,PRKCH,PTHLH,SFRP1,TNF,VIM	715 (22)
PIK3R1	2.302	kinase		0.158		0.00347	ACTA2,AR,ATF5,CCND1,COL1A2,DDIT3,F3,FOS,ICAM1,IL6,ISG15,PDX1,PIK3R1,PPARG,TNF,TRIB3,VCAM1	704 (22)
NTRK2		kinase		1.915	bias	0.0035	ANGPT1,BDNF,BMP2,CCND1,CDH1,CDKN2B,FOS,Muc1,PIK3R1,Pou3f1,PYCARD,RB1,SNAP25,TNF,TNFSF10,VIM	756 (17)
PRMT5	-0.841	enzyme		0.358		0.00358	CCND1,CDKN2A,CEBPA,GAS1,KHDC3L,Nppb,PPARA,PPARG,PPARGC1A,SLC45A3,SOX2,WIF1	793 (25)
FSHR		G-protein coupled receptor		1.664		0.00358	AR,ESPN,ESR2,FABP5,GDE1,IGFBP3,INHA,KITLG,MEDAG,MSI1,PGR,PLA1A	474 (13)
NOX4	2.436	enzyme	Activated	2.907		0.00358	ACTA2,CDH1,COL1A1,DES,EPAS1,GSTA5,HAS2,ICAM1,NOX4,Saa3,TP53,VIM	732 (20)
miR-124-3p (and other miRNAs w/seed AAGGCAC)		mature microRNA	Inhibited	-2.147	bias	0.00362	AP1M2,ASPRV1,BDNF,BTG3,CAV1,CCN2,CEBPA,CYP1B1,DDIT3,DRAM1,EYA4,FA2H,FSTL1,GLI3,HEBP2,HES1,Hoxa11os,HTATIP2,LIMCH1,LRRC1,NFATC1,NID1,NME4,OAF,PAPSS2,PGF,PHF19,PRKD1,RAVER2,RBM47,SERPINB6,SLC25A30,TOM1L1,TRIM29,VSNL1,ZCCHC24
KAT2A	1.263	enzyme		-0.394		0.00362	ADAM12,ADAMTS1,ADAMTS5,APBB1,BCL11A,BCL11B,CCND1,CSRP2,E2F2,FABP5,FBXO32,HDAC11,MYOM3,NGFR,OTX1,PIK3R1,PPARGC1A,PROM1,Ptprd,RHOU,SLC1A5,TNFRSF10A	773 (22)
Pdgf (complex)		complex		0.712		0.00372	CAV1,CCND1,CDKN2B,F3,FAM189B,FOS,GJA1,ICAM1,NCAM1,NOTCH3,NOX4,ODC1,PIK3R3,PLAUR,PPARG,THBD,TIMP3,TP53,VCAM1	795 (20)
farnesol		chemical reagent		1.063	bias	0.00374	CD1D,DDIT3,Flg,LORICRIN,PPARA,TNF,TP53	691 (20)
agmatine		chemical - endogenous mammalian		1.812	bias	0.00374	BBOX1,BMP2,ICAM1,ODC1,PPARA,PPARG,PPARGC1A	437 (7)
Lh		complex		1.734		0.00374	ACTA2,ACTG2,ADAMTS1,ALPL,AR,AREG,ARL4C,ATP9A,AXL,BDNF,CAP2,CARD10,CDK14,COL18A1,DHRS3,DUSP9,DYRK3,FGFR2,FKBP5,FLNC,FOS,GJA1,HAS2,IL6,INHA,KRT18,OSBPL6,P4HA2,PGR,PLCL1,PPP2R5B,PRKD1,PTPRF,PTPRN,RAB27A,RAPGEF3,RGS5,Rpl29 (includes others),SLC16A3,SLC1A4,SNAP25,STARD5,TBX3,TEX15,TFPI2,THBS2,THRB,TNFRSF11B,TP53,ZBTB16	741 (21)
MTOR	1.051	kinase	Activated	2.081		0.00375	ALDH1A3,AR,ARL4C,ATP6V1C2,CCND1,CDH1,CEBPA,CHKA,CKMT1A/CKMT1B,DDIT3,Defb1,ENO1,EPAS1,FABP5,FBXO32,FDPS,GATA3,GSTM5,IL1A,IL6,INHA,ISLR2,LDHD,MAP2,MB,MDM2,NCAM1,NEURL1B,NOX4,PDE4A,PGR,PPARA,PPARG,PPARGC1A,PRKCZ,PTH1R,RORC,RPL32,SERPINB1,SGCB,SLC16A3,SLC2A4,SOX4,SRPX,TMPRSS2,TNF,TNFRSF10A,TNFRSF11B,TNFSF10,TP53,Tpm3-rs7,VCAM1	744 (20)
mir-204		microRNA		1.825		0.00382	BDNF,BMP2,BMPR1B,CAMK2B,CHRD,DDIT3,FOXC1,IL6,MICOS10-NBL1/NBL1,PIK3R1,PRKCG,SNAP25,TNF	535 (13)
tectorigenin		chemical - endogenous non-mammalian		-0.705	bias	0.00382	DDIT3,ICAM1,LPAR1,PDX1,TNF	648 (15)
HCAR1		G-protein coupled receptor		-0.456		0.00382	COL1A1,IL6,PPARGC1A,SLC16A3,TNF	311 (9)
LINC00324		other	Activated	2.213	bias	0.00382	CDH1,EPCAM,FAM83B,PROM1,SOX2
MBNL1	-0.769	other		-1.949		0.00382	DMPK,POSTN,PROM1,SOX2,SOX4
HLF	9.264	transcription regulator				0.00382	AQP4,BCL2L14,HLF,PPARA,SCNN1A
CDON	1.882	other		-1.4		0.00382	CCN2,GJA1,Nppb,TIMP3,TUBB3	458 (7)
LDL		complex		1.653		0.00386	AXL,BMP2,C3,CAMK2B,CAPN2,CCN2,CCND1,CDKN2A,CTSK,CXCL6,DDIT3,ECE1,EDNRB,EMB,F3,FDPS,FOS,GCLM,GNAI1,HAS2,HAS3,ICAM1,IGFBP2,IGFBP3,IGFBP4,IL1A,IL1RN,IL6,LAMB3,MMP3,OSBPL6,PPARG,PTPRF,RND3,SPHK1,TGFBR3,TNF,TNFSF10,TP53,VCAM1,VNN1	690 (16)
TSC2	0.122	other		-0.373		0.00386	A2M,ARC,CCND1,CP,CRIP1,CRYAB,CST6,DDIT3,EMP3,ENPP2,FAM107A,FOS,Ifi47,IGFBP5,IL13RA1,IL17RB,IL22RA1,LPAR1,METRN,MGP,Nppb,NSDHL,NTRK3,SCD,SCPEP1,SMPDL3A,TAGLN	661 (19)
H89		chemical drug	Inhibited	-2.373	bias	0.00386	ALPL,AQP5,AREG,BDNF,BMP2,BMP6,CCND1,COL10A1,DMP1,ESR1,FAM3B,FOS,GJA1,IGFBP5,IL6,NFATC2,NOS1,PDE3B,PDX1,PGR,PLA2G4A,PPARGC1A,SNAP25,TFPI2,TNF,TPH1,VCAM1	770 (24)
HR	0.679	transcription regulator	Inhibited	-2.333		0.00388	AMD1,CALML5,CASP14,CTNND2,Flg,FOXN1,GJA1,HAL,LORICRIN,PVT1,SOSTDC1
N-acetylsphingosine		chemical reagent		-0.742		0.00388	COL1A1,COL1A2,CRYAB,FOS,GSTM5,PDE3B,RB1,RXRA,SPHK1,TNF,TP53	622 (17)
3-deazaneplanocin		chemical drug		1.562		0.00395	FBXO32,FOXA1,IGFBP3,KRT17,KRT7,LAMB3,NOX4,PLXNB1,PPP1R15A,SLC7A2,SOX12,TIMP3,TSC22D3,USP53	242 (8)
BMI1		transcription regulator		-0.235		0.00395	BTG2,CDH1,CDKN2A,CDKN2B,GLIPR1,HOXB9,LOX,NGFR,NID1,SELENON,SERPINB5,SFN,TP53,VIM	809 (20)
TBX5		transcription regulator		1.499		0.00399	ACE2,ANKRD1,CCBE1,CLSTN2,COL1A1,COL1A2,CXCL6,DES,GJA1,IL6,MYL7,NFATC2,POSTN,S100A4,SLC8A1,VIM	678 (18)
NR1I3		ligand-dependent nuclear receptor		1.63	bias	0.00399	Aldh1a7,CYP39A1,CYP3A5,CYP7B1,EPHX1,Gsta4,GSTA5,GSTM5,Gstt1,ICAM1,MDM2,PAPSS2,PDE3B,SAT1,SCD,SLC29A1,Sult1a1,TMPRSS2,UGT1A1,UGT1A3
TARDBP	0.592	transcription regulator		1.772		0.004	ACAT2,C3,FDPS,HLA-A,HLA-E,IDI1,IL6,LCN2,MVD,Mx1,NSDHL,SERPING1,TNF,VLDLR,WNT5A	492 (10)
entinostat		chemical drug		-0.007		0.004	ADAMTS5,ARC,BBC3,CCND1,ERBB3,IGFBP3,MICB,MMP3,RB1,RORC,THBS2,TNFRSF10A,TNFRSF19,TNFSF10,TP53	657 (17)
Sod		group		0.816		0.00405	Abcb1b,DSC2,DSG1,ICAM1,TP53,VCAM1	564 (16)
CHD1	-0.014	enzyme	Activated	2.449	bias	0.00405	BMP2,CXCL6,ICAM1,IL1A,IL6,TNF
STK3	-0.207	kinase		-1.664		0.00405	CCN2,CCND1,IL6,PDPN,SOX4,TNF	533 (18)
EPHX2		enzyme		0.564		0.00405	BDNF,CXCL6,HES1,ICAM1,IL6,VCAM1	620 (19)
ITGB6	3.643	other		1.491	bias	0.00405	CDH1,COL1A1,COL1A2,Mcpt1,MMP3,PTHLH	787 (19)
premarin		chemical drug		1.741		0.00405	AREG,CCN5,GREB1,LTF,PGR,TNF
Go6983		chemical drug		-1.546		0.00405	CCN2,CLDN1,FOS,PPARA,PPARG,TRAF1	665 (22)
zearalenone		chemical toxicant		-0.064		0.00405	CCND1,ESR1,ESR2,IL6,KITLG,TNF	640 (19)
ADIPOQ		other		-0.985		0.00406	ACTA2,ARG1,BMP2,CCN2,CCND1,CDKN2A,CEBPA,CYP1B1,CYP3A5,ESR2,F3,FGFR2,FOS,FZD1,FZD2,FZD8,ICAM1,IGFBP4,IL6,LEPR,MMP3,NOX4,PDCD4,PPARA,PPARG,PPARGC1A,PRKAA2,SCD,SLC27A1,SLC2A4,TNF,TP53,TRAF1,VCAM1,WNT11,WNT4,WNT5A,WNT6	503 (18)
hydrocortisone		chemical - endogenous mammalian		-1.639		0.00413	ALOX15,ANKRD1,AQP4,CBR1,CCN2,CCND1,CDH11,CEBPA,COL1A1,COL1A2,ICAM1,IGFBP3,IGFBP4,IGFBP5,IGFBP6,IGFBP7,IL6,LOX,PLA2G4A,PPARG,SEMA6A,SFRP1,TNFRSF11B,TP53,TSC22D3,VIM	840 (19)
CA4	1.374	enzyme		-1.134	bias	0.00415	ANK1,DDIT3,KRT13,KRT4,KRTDAP,LORICRIN,RPTN,TMC5
REN		peptidase	Activated	2.614		0.00415	APLN,CCN2,F3,FOS,ICAM1,IL6,NOX4,TNF	740 (19)
FABP4	0.554	transporter		0.801		0.00415	CCK,FABP5,IL1A,IL6,LTB4R,PPARA,PPARG,TNF	613 (21)
PKNOX1	-0.238	transcription regulator		1.709		0.00415	AMD1,COL5A2,HOXB2,IL6,Meis1,PPARGC1A,SLC2A4,TNF
N-cor		group		-1.455	bias	0.00416	BIN1,CCND1,CXCL14,DHRS3,ESR1,FADS2,FZD1,HEBP1,HES1,IDH1,IGFBP3,IL1A,INPP4B,NFATC1,PDGFB,PLA2G3,SCD,SLC2A4,TBX15	756 (23)
GW9662		chemical reagent		0.724		0.00416	CAV1,CCN2,CD1D,CEACAM1,CEBPA,EGLN3,ESR2,FADS3,FOS,GDF15,IL6,LCN2,PDX1,PPARG,PPARGC1A,RORA,RORC,TNF,VCAM1	778 (23)
PITX2		transcription regulator		1.268		0.00418	ATP1B1,CACNA1G,CCND1,CDH1,COL1A2,COL8A2,FOXC1,FZD2,GPX7,HPGD,IRF6,ISL1,KCNK2,KCTD1,NGFR,PITX1,PLOD2,SOX2,TBX15,TBX3,VIM,WNT5A,WNT6	729 (19)
ZBED6		transcription regulator		-0.707	bias	0.00424	ARL4C,COL13A1,FOSL2,KCTD1,KITLG,MYBL1,PDX1,PMEPA1,TUBB3
TIMP1	-0.981	cytokine		-0.426		0.00424	Cdkn1c,IGFBP3,IL33,MMP3,PLAUR,ST14,TIMP2,TIMP3,TP53	695 (20)
CTCF	-0.085	transcription regulator	Activated	2.805		0.00431	ARC,AVPR1A,BDNF,CDH1,CDKN2A,GAL3ST1,IL12RB1,IL6,NCAM1,PCDHB11,Pcdhb11,PCDHB12,Pcdhb12,PCDHB14,Pcdhb14,PCDHB16,Pcdhb18,Pcdhb6,Pcdhb7,PCDHB8,RORC,TNF,TP53,ZBTB16	578 (12)
trinitrobenzenesulfonic acid		chemical reagent	Activated	2.655	bias	0.00432	ADAM12,CCL24,CLDN1,COL1A1,COL1A2,CXCL6,Cxcl9,FOS,IL1A,IL6,LCN2,LUM,MMP3,NR1H4,PTGDS,Saa3,TACR1,TNF	689 (18)
methylselenic acid		chemical reagent		-0.565		0.00434	ABCA5,ACKR3,ADAMTS1,AR,ATF5,CCND1,CDKN2A,DDIT3,DPYSL2,ELF3,ENPP5,EPHX1,ESR1,ESR2,FKBP5,FOXA1,GDF15,HOXD8,IGSF3,INPP4B,MAP1B,MXD1,NQO1,NREP,PLCB4,RAB29,RB1,RND3,SAT1,SCD,SERPINB5,SH3BP5,SSBP2,TGFBR3,TMPRSS2,WASF1,WNT7A,ZBTB16	902 (20)
Calmodulin		group		0.832		0.00445	Aldh1a7,BDNF,CNTN2,DLG3,DOC2B,F3,FLT3,ICAM5,NOS1,NPAS2,RAB40B,TIAM2,TSPAN17	571 (15)
palmitic acid		chemical - endogenous mammalian		-0.294		0.00447	ATF6,BBC3,CCN2,CDKN2A,CGAS,DDIT3,DGAT2,EGLN3,F2RL1,FBXO32,FDPS,FOS,GDF15,ICAM1,IL1RN,IL6,KCNN4,LCN2,MGAT4A,MVD,NTN1,Orm1 (includes others),PDX1,PNPLA2,PPARA,PPARG,PPARGC1A,RARRES2,Saa3,SCD,SLC2A4,SORT1,SPHK1,THBD,TNF,TNFSF10,TP53,TRIB3,VCAM1,VIPR2	741 (19)
FMR1	0.342	translation regulator		0.239		0.00451	ARC,BASP1,CLSTN2,CLSTN3,COL5A2,CYP1B1,DLG3,DNM1,ENO1,GRIN1,ICAM5,IGFBP4,KALRN,MAP1B,MYL9,NAPB,NPEPL1,Pcdhb11,PXMP4,SLC29A1,SMOC1,SNAP25,STX11,SYNGR1,VGF,VWA1
12(S)-hydroxyeicosatetraenoic acid		chemical - endogenous non-mammalian		0.988		0.00453	IL6,PPARG,RB1,TNF	723 (22)
fingolimod phosphate		chemical - endogenous mammalian		1	bias	0.00453	CCN2,HAS2,IL6,SPHK1	481 (7)
PADI4	2.557	enzyme				0.00453	BBC3,IL6,OSGIN1,TNF	569 (15)
linsitinib		chemical drug		-1.246	bias	0.00453	ACTA2,CCN2,COL1A1,TNFSF10	559 (10)
SLC39A8	4.365	transporter		0.106		0.00453	ADAMTS5,IL6,MMP3,TNF
PON2	-0.319	enzyme				0.00453	DDIT3,IL6,TFPI,TNF	429 (16)
EHD2	-1.99	other		1.177		0.00453	CAV1,CAVIN2,PNPLA2,PPARG
STAG1	-0.343	other	Activated	2	bias	0.00453	PCDH7,PCDHB11,PCDHB16,PCDHB8
mir-190		microRNA		1		0.00453	CCND1,CDH1,CLDN1,VIM	577 (11)
CYSLTR1	0.118	G-protein coupled receptor				0.00453	CDH1,FOS,NFATC1,NFATC2	517 (13)
KSR1	2.521	kinase		1	bias	0.00453	CDKN2A,CDKN2B,TP53,Tpm2	408 (13)
ANK3	-0.526	other		0		0.00453	EPN3,GDF15,KLHDC7A,PTPRN
RBM38	-2.102	other		1.987		0.00453	CDKN2A,MDM2,TP53,TP73	512 (9)
SDC2	-2.441	other		1.683		0.00453	ACTA2,MMP7,TGFBR3,TP53	694 (13)
CUL7	1.396	enzyme		-1.195		0.00453	CDH1,KCNH1,TP53,VIM	483 (7)
NEU3	2.547	enzyme		1	bias	0.00453	AR,CLIC3,MMP7,RAB25
RBCK1	-0.486	transcription regulator		0.152	bias	0.00453	CCND1,ESR1,ICAM1,VCAM1	461 (9)
farnesyl transferase		complex				0.00453	CRYAB,GJA1,IL6,MMP7	745 (19)
ACTA2	4.241	other		-0.927		0.00453	ACTA2,CCN2,CDH1,VIM
MM-401		chemical reagent		-1	bias	0.00453	DEPTOR,HOXA10,HOXA11,HOXA13	68 (3)
coumestrol		chemical toxicant		-1.941		0.00453	ESR2,FOS,IL6,PGR	818 (20)
AGI-1067		chemical drug		-0.762	bias	0.00453	F3,IL6,TNF,VCAM1	690 (16)
levofloxacin		chemical drug		-1		0.00453	HAS2,IL1A,IL6,MMP3
theaflavin		chemical - endogenous non-mammalian		-1.131		0.00453	AR,ICAM1,IL6,VCAM1	698 (20)
RETNLB		other	Activated	2.068	bias	0.00454	ACTA2,CAMK2B,CCN2,COL1A1,COL1A2,CTSE,FZD1,IL13RA1,IL6,MAP3K6,MSN,PLA1A,Saa3,SFRP1,THBS4,WNT5A	671 (16)
sodium arsenite		chemical drug		0.185		0.00455	CCND1,CEBPA,CISH,DDIT3,ENO1,EPAS1,ESR1,FOS,GCLM,PGR,PPARG,SLC2A4,TNFSF10,TP53	735 (19)
isotretinoin		biologic drug		1.646		0.00458	ALDH1A3,CRABP2,CYP1B1,ELF3,GATA3,HPGD,IGFBP3,IL6,LCN2,ODC1,RBP1,SLC6A14,TMPRSS4,TNFSF10,VCAM1	779 (21)
miR-34a-5p (and other miRNAs w/seed GGCAGUG)		mature microRNA		-1.127	bias	0.0046	AXL,CACHD1,CCN5,CCND1,DPYD,E2F2,FAM110C,GFRA1,GTF2IRD1,HID1,ICAM1,PLCB1,PPARG,SERPINB8,SLCO3A1,SOX2,SPINT2,TAGLN,TMC7,TMEM154,TP53,TP53INP1,TSPOAP1
MTA1	-0.631	transcription regulator		-0.603		0.00463	ACKR3,CCN5,CCND1,CDH1,CDKN2A,ESR1,PAX5,PGR,PIK3R1,SERPINB1,TNF	773 (24)
MED13	0.065	transcription regulator	Inhibited	-2.143		0.00463	ACSM3,ANKRD1,CIB2,CLSTN3,ENO1,KITLG,PCSK9,PPARG,SCD,SLC2A4,TMEM45B	314 (3)
ritonavir		chemical drug		-1		0.00473	ACAT2,ARHGEF19,ATP10B,CRYAB,CYP3A5,EPHA1,FADS2,FDPS,FGFBP1,GRAP,ICAM1,IDI1,IL6,KITLG,ME1,OSBP2,PPARG,SCD,TMPRSS4,TNF,TSC22D3,UGT1A1,UGT1A6,VCAM1	763 (20)
CNR1		G-protein coupled receptor		0.663		0.00484	ALPL,APBB1,APCDD1,BCL11B,BDNF,BMP2,CEACAM1,CYP7B1,FOS,HEYL,HOXD13,IL6,KRT6B,LRP4,MSX1,NTN1,PAX5,RGMA,SLC29A1,SLC2A4,SOX6,TACR1,TNF,UPK1B,WNT6	641 (19)
morphine		chemical drug		-0.545		0.00484	AQP4,ARC,BDNF,CCK,CCND1,ERBB3,FOS,FOSL1,FOSL2,GATA3,GJB6,GRIN1,IL6,KCNAB2,NET1,NTRK3,PPP1R14C,RGS20,SLC1A1,SOX2,THBS2,TNF,TP53,TRPC1,WNT7A	733 (22)
FOLR1		transporter				0.00484	ADA,ALDOC,AOC3,AQP4,BASP1,CAV1,CELF2,EPCAM,GBA,HOXB9,LPAR1,NSDHL,PDCD4,PPARG,PVT1,S100A4,SCD,SLC15A2
quercetin		chemical drug		-0.381		0.00485	ADGRL2,AR,BDNF,C3,CAV1,CELSR2,CRIP1,ESR1,FOS,FZD1,ICAM1,IL6,ISG15,KRT17,KRT18,KRT8,LCN2,LEPR,MAP2,NPAS2,NT5E,ODC1,PDX1,PLAC8,PLAUR,PPARGC1A,PPP1R15A,THSD4,TMC5,TNF,TP53,VCAM1,WNK1,WNT5A,ZCCHC24	582 (17)
LMNA	-0.357	other		-1.516		0.00487	ACTA2,ADAMTS12,AI987944 (includes others),ALPL,ASPN,BAMBI,CCN2,CEBPA,COL11A1,COL12A1,COL1A1,DES,EPB41L3,GJA1,GRAP,HAS3,Klra7 (includes others),KRT18,LRP4,MMP15,MMP3,MYL7,NPR2,PCDH7,PPARA,PPARG,PWWP3B,RB1,SLC22A23,SLC41A2,SMARCA2,SOX13,ST6GALNAC4,TIMP2,TIMP3,TNS2,TUBB3,Zfp760,ZNF704	713 (16)
GSK3B	0.014	kinase		0.11		0.00489	AR,CCND1,CDH11,CTNND2,CXCL6,DDIT3,ESR1,FOS,IL6,ISG15,LCN2,MPZ,NFATC1,NFE2L3,PDX1,PMP22,TNF,TNFSF10,TP53,TP63,TRAF1,TUBB4A	632 (17)
betamethasone		chemical drug		-0.378		0.00493	CAV1,CCN2,CRISPLD2,CYP3A5,GCLM,NQO1,TIMP3	298 (7)
SEMA7A	-1.134	transmembrane receptor	Activated	2.646	bias	0.00493	CCN2,CCN5,COL1A1,COL1A2,IL13RA2,SMAD6,TNF	356 (7)
WDR5	0.135	transcription regulator		-0.485		0.00493	ESR1,MDM2,SFRP2,TMPRSS2,TP53,VIM,WNT3A	369 (7)
HTATIP2	4.074	transcription regulator				0.00493	ADGRB1,ANGPT1,CCND1,CDH1,FOS,SOX2,TP53	657 (20)
DEF6	-0.04	other		-1.724		0.00493	CDH1,FOS,IL6,NFATC1,PRDM1,TNF,VIM	476 (22)
miR-18a-5p (and other miRNAs w/seed AAGGUGC)		mature microRNA		-1.331	bias	0.00493	BTG3,CCN2,CCND1,E2F2,ESR1,SOX6,TP63	413 (7)
PLA2G6	0.135	enzyme		1.89		0.00493	ALOX12,ARG1,DDIT3,MRC1,NOX4,PPARG,TNF	801 (24)
desipramine		chemical drug		-1.503		0.00493	BDNF,FGFBP1,FOS,IL6,KCNH2,PDE4A,TNF	678 (25)
NOG		growth factor		-0.664		0.00497	BMP2,CCN2,FOXG1,HAS2,ISL1,Ivl,LORICRIN,MMP3,NCAM1,NGFR,VCAN,WNT5A	717 (22)
MFAP5	3.906	other		-0.653		0.00497	APLN,BAIAP2L2,CDH1,ERBB3,GIPC3,GPX3,ITGA7,MFAP2,MRAS,MYLIP,SLC25A27,TFPI
PLIN5		other		0		0.00498	ACTA2,COL1A1,GSTA5,IL6,NQO1,PNPLA2,PPARA,PPARG,PPARGC1A,TNF	545 (13)
PCGF2	0.165	transcription regulator		-0.18		0.00498	CDH1,CDKN2A,GATA3,HES1,HOXB9,NOTCH3,PDE3B,SORL1,TP53,VIM	779 (23)
FGF19	-13.249	growth factor		0.025		0.00501	AQP4,AREG,BTG3,CCND1,CTSE,CYP7B1,ENO3,FABP5,FDPS,FOS,IL1RN,LCN2,LEPR,PROM1,PTGDS,Saa3,SCD	721 (19)
CDKN1A	-0.445	kinase	Inhibited	-2.747		0.00509	ACTA2,ARL6IP1,ASPN,BBC3,CCN2,CCND1,CDKN2A,CDKN2B,COL5A1,CRYAB,CTSK,Cxcl9,DSE,E2F2,FAT2,Flg,GNAI1,GSTO1,HSPA1A/HSPA1B,IL6,Ivl,Krt10,KRT18,KRT5,LORICRIN,MDM2,MMP3,MSN,MSX1,Pmaip1,RB1,TGM1,TNF,TP53,TP63,TRIM44,TUBB3,TUBB4A,VIM,WNT4	674 (18)
TO-901317		chemical reagent		0.502		0.00513	ABCA5,ALDH2,C3,C5,CCL24,CCND1,CH25H,CYP3A5,CYP7B1,EHHADH,ENO1,EPHX1,FABP5,FADS1,FADS2,FDPS,Gsta4,GSTA5,GSTM5,IGFBP4,IL6,LIFR,LTC4S,Naip1 (includes others),Orm1 (includes others),PCSK9,PDX1,PGLYRP1,PPARG,PTGDS,RDH12,SCD,SLC2A4,TIMP3,TNF,VLDLR	521 (19)
G protein alphai		group	Activated	2.221	bias	0.00522	ADAMTS1,C1R,C1S,FAM167A,FLNC,FOS,FOSL1,FOSL2,HLA-A,ISG15,PTHLH,SERPING1,SP6,SPHK1,TGM1	715 (22)
levothyroxine		chemical - endogenous mammalian	Activated	2.359		0.00522	Abcb1b,BBC3,CCK,CDK14,CDKN2A,ESR1,FOS,GDF15,IGFBP3,IGFBP4,IGFBP6,NGFR,RORA,SFRP2,Ugt1a7c	676 (19)
mir-221		microRNA	Inhibited	-2.395		0.00522	BBC3,CCN2,Cdkn1c,ESR1,PIK3R1,SLC2A4,TIMP3,TP53,TUBB3	436 (7)
green tea polyphenol		chemical drug		0.268		0.00522	CAV1,CDH1,FOS,ICAM1,IGFBP3,IL6,PIK3R1,PPARG,TP53	759 (21)
NPC2	-0.028	transporter		-0.926		0.00525	AKR1C3,BMP2,IL6,PLA2G4A,PPARG,PTGDS,PTGER4,TNF	566 (16)
acteoside		chemical - endogenous non-mammalian		-0.317		0.00525	FOS,GCLM,IL6,MAP2,NFATC1,NQO1,TNF,TP53	560 (15)
PKD1	-1.283	ion channel		-1.122		0.00538	ACOT2,ACOX2,ACSS1,ADCY3,ATP1B1,AXL,BCAT1,CCN2,COL12A1,DDIT3,DNAI7,EDIL3,ENPP5,GATM,GREM1,Hoxb3os,IDH1,IFNLR1,IL17RB,JPH2,KLKB1,KRT18,LOX,PCDH7,SEMA4C,SLC2A9,SLC8A1,SOX6,SSTR2,TNFRSF11B,TRIM15,ZFHX4	399 (6)
MAPK8	-0.518	kinase		1.149		0.00544	AQP1,B4GALT5,BBC3,BMP2,CCN2,CCND1,CDH1,CDKN2A,COL1A1,CSTA,DDIT3,FOS,FOSL1,FOSL2,IL6,MAP3K9,MMP3,MMP7,NOX4,PLAUR,PPARGC1A,RBP1,TACR1,TNF,TP53,TSC22D3,WNT4,WNT5A,WNT6	695 (15)
FYN	-0.844	kinase		0.853		0.00549	ARC,CD5,Flg,FOS,IL23R,IL6,Pou3f1,RORA,RORC,TNF,TP53	657 (18)
PPRC1	-0.113	transcription regulator	Activated	2.143	bias	0.00549	BMP6,CLDN1,GDF15,GNG11,IL13RA2,IL1A,LAMB3,LCN2,RND3,TMEM154,ZFP36L1
omeprazole		chemical drug				0.00549	A2M,CBR1,CCN2,CELF2,CNN1,CYP3A5,EPAS1,FOS,PRRX2,TSPAN7,UGT1A1	492 (7)
n-3 fatty acids		chemical drug		0.829		0.00549	FADS1,FADS2,GPX2,IL6,PDGFB,PIK3R1,PPARA,PPARG,SCD,SLC2A4,TNF	671 (21)
glycine		chemical - endogenous mammalian		-0.745		0.00558	BDNF,CCND1,FOS,ODC1,PCK2,TNF	669 (20)
mannitol		chemical - endogenous mammalian		1.727		0.00558	Abcb1b,AQP4,CCN2,COL1A1,ICAM1,MPDZ	654 (16)
Pdgf Ab		complex		0.393	bias	0.00558	ANGPT1,AREG,CCND1,FOS,IL6,SCD	643 (20)
ATP2A2	0.108	transporter		0.816		0.00558	ATP2B4,CCND1,DDIT3,DGAT2,NFATC1,SCD	573 (14)
SLC2A1	0.535	transporter		-1.671		0.00558	DDIT3,DHRS9,Gsta4,NQO1,PPARA,SLC1A5	472 (7)
EREG	-1.348	growth factor		1.791	bias	0.00558	AREG,HAS2,IL6,PGF,TNC,TNF	728 (19)
BARX2	8.112	transcription regulator	Activated	2.191	bias	0.00558	ACTA2,ESR1,L1CAM,NCAM1,SOX5,TIMP3
MAML1	0.156	transcription regulator		0.518	bias	0.00558	CCND1,CDH1,HES1,HEYL,IL1A,RND3	626 (18)
latrunculin B		chemical reagent	Inhibited	-2.425	bias	0.00558	ACTA2,CCN2,CNN1,DES,FOS,TAGLN	494 (15)
diclofenac		chemical drug		-0.336		0.00563	AQP4,AREG,ASNS,ATF6,BCAT1,CCND1,CLDN4,DDIT3,FOS,GDF15,HPGD,IL1A,IL6,MTHFD2,PPP1R15A,TNF,TRIB3	650 (20)
particulate matter		chemical reagent		1.172		0.00572	IL6,Pmaip1,TFPI,THBD,TNF	525 (12)
BCO1		enzyme				0.00572	HTATIP2,PPARG,PRKAA2,RNF186,SLC25A30
ANG	-1.149	enzyme		0.762		0.00572	GCLM,Gsta4,IL6,NQO1,TP53	419 (7)
CXCL5		cytokine		0.562	bias	0.00572	ACTA2,CDH1,COL1A1,PPARGC1A,TNF	725 (24)
mir-127		microRNA		0.865		0.00572	ARG1,IL6,MRC1,MRC2,TNF	282 (7)
DOCK2	0.591	other		0.346		0.00572	IL6,PPARA,PPARGC1A,PRDM16,TNF	240 (7)
GNA11	2.257	enzyme		-0.2	bias	0.00572	ADAMTS1,ALPL,EDN2,PGR,PRKG2	375 (8)
PA2G4	-0.068	transcription regulator		-1.41		0.00572	AR,GDF15,PDPN,SLC43A1,TMPRSS2
trans-stilbene oxide		chemical reagent		0.692	bias	0.00572	CYP3A5,EPHX1,GSTM5,NQO1,UGT1A6	22 (2)
hydroquinone		chemical - endogenous mammalian		0.179		0.00572	FOS,GSTA5,IL6,SFN,TNF	626 (18)
adefovir dipivoxil		chemical drug				0.00572	ACTA2,COL1A1,DES,IL6,TNF	328 (9)
LHX1		transcription regulator	Activated	3.048	bias	0.00577	ATP1B1,C7orf57,Defb1,EMB,FUT9,Fxyd2,FZD8,GATM,GGT1,GSTA5,HHEX,KCNJ15,PDPN,RBM47,SFRP1,SLC34A1,SOSTDC1,TMIGD1,UGT1A3
LPL	-0.114	enzyme		0.754		0.0058	ICAM1,IL6,Nppb,PNPLA2,PPARA,PPARG,PPARGC1A,PRKAA2,SLC27A1,SLC2A4,TNF,VCAM1	763 (21)
GCG		other		0.372		0.0058	ACKR3,BTG2,CCN2,FDPS,FOS,FOSL2,GFRA1,GREM2,IGFBP4,ODC1,Pde4d,PDX1,PPARGC1A,SLC2A4,TENT5A,VCAM1	689 (22)
IL5		cytokine	Activated	3.048	bias	0.00584	A2M,ALDOC,AREG,ASNS,ATP1B1,CD5,CEACAM1,CISH,CRIP1,Crisp1/Crisp3,EGLN3,ENO1,FAM162A,FOSL2,GCLM,ICAM1,IDI1,IL13RA1,IL2RG,ITGB6,ITGB7,JCHAIN,KCNAB2,LIMK2,LUM,MKRN3,MMD,PAX5,PMP22,PRDM1,QSOX1,RBPMS,S100A4,SCEL,SEMA4A,Serpina3g (includes others),SLC16A3,SLC1A5,SLC39A8,STK39,TNF,VIM	814 (17)
MEF2D	-0.508	transcription regulator		0.811		0.00593	BDNF,CCN2,CCND1,CDH1,COL1A2,FOS,GCLM,Gsta4,GSTA5,Nppb,NQO1,PPARA,PPARGC1A,SLC2A4,VIM	594 (14)
tetracycline		chemical drug		1.069		0.00593	AK4,CACNA2D1,CCN2,COL1A1,ITGAE,MAL,ME1,NDRG2,PCDH18,RAPGEF5,RPS6KA2,SLC1A4,SLC25A30,SPTLC3,TP73
PTGES	-1.991	enzyme		1.455		0.00596	CCN2,CDH1,CXCL14,ERBB3,IL6,NEB,NOS1,NOX4,Nppb,PPARG,TNF,TRAF1,VIM	729 (20)
ABCB4		transporter	Inhibited	-2.611	bias	0.00598	ACTA2,CCN2,CGAS,COL1A1,COL1A2,DES,ELF3,NOX4,PROM1,VIM	608 (17)
SLC9A3R1	1.946	other		1.632		0.00598	CCL24,CDH1,CXCL6,ERBB3,IL33,IL6,KRT19,MSN,S100A4,SLC34A2	832 (24)
SUMO2	0.686	enzyme	Inhibited	-2.55		0.00598	CAV1,CEACAM1,ENPP3,IL6,ISG15,Mt3,PIK3R1,PLA2G3,TNC,TSC22D3	447 (7)
ibuprofen		chemical drug		-1.979		0.00598	CCND1,COL12A1,EDNRB,EPAS1,GDF15,IL6,NGFR,PPARG,RAC3,TNF	685 (18)
paricalcitol		chemical drug		-1.51		0.00598	BMP2,F2RL1,F3,ICAM1,Nppb,PTGER4,PYCARD,TFPI,TNF,VCAM1	447 (12)
pentoxifylline		chemical drug		-0.828	bias	0.00598	CCN2,CCND1,COL1A1,FOS,ICAM1,IL6,POSTN,REL,TNF,VCAM1	720 (20)
maslinic acid		chemical - endogenous non-mammalian		-0.631		0.00605	CCND1,CDH1,Clca3a1/Clca3a2,IL2RG,LIMK2,MAP2K6,MSN,PIK3R1,PLAUR,PNPLA2,PPARA,PPARG,PRKCI,RPS6KA2,SLC5A1,TNF,TP53,WNT5A	557 (13)
MED1	0.14	transcription regulator		0.904	bias	0.00614	BCL11A,CAPSL,CCN5,CCND1,CEBPA,CYP3A5,EBF1,EHHADH,EML1,EPHA3,FADS2,GREB1,HAS2,IGFBP3,LAD1,LY6D,MB,MDM2,MYO18B,ODC1,PPARG,PRDM1,PRKCH,SCD,SCPEP1,SLC27A1,SLC2A4,SLC39A8,SOX2,SYNPO2,TBX3,Tcf7,TP53	847 (22)
miR-450a-5p (and other miRNAs w/seed UUUGCGA)		mature microRNA		-0.333	bias	0.00637	COL1A2,COL5A2,EMP3,ESR1,KLF8,KRT14,MMP3,STEAP1,VIM
TRIB3	-3.859	kinase		1.609		0.00637	ASNS,CEBPA,DDIT3,FBXO32,GDF15,MTHFD2,PCK2,PPARG,TRIB3	669 (18)
4-tert-octylphenol		chemical toxicant		1.118		0.00637	AR,CLSTN2,DLG3,ESR1,ESR2,GABRP,ITGAE,Muc4,PGR	544 (12)
ADCY		group		-0.816		0.00638	CYP1B1,FOS,GJA1,IL6,NFATC1,TNF,TP53	604 (20)
Ikb		group		1.095	bias	0.00638	CCND1,HHEX,ICAM1,IL6,KRT6B,TNF,TP73	530 (12)
MAP3K3	-0.454	kinase				0.00638	ADSS1,BMP2,FOS,HAS2,IL6,POSTN,TGFBR3	614 (18)
FBN1	3.541	other	Inhibited	-2.415	bias	0.00638	CCN2,COL1A2,FBN1,MMP3,PPARG,Sox2ot,TIMP3	787 (14)
RBP4		other		0.136	bias	0.00638	ARG1,IL6,Nppb,PYCARD,RBP1,SLC2A4,TNF	647 (18)
NTRK1	1.599	kinase		0.152	bias	0.00638	BDNF,FOS,LGALS1,TACR1,TP53,TSC22D1,WNT5A	636 (19)
TNFAIP6	0.082	other		-0.314		0.00638	ACTA2,CDH1,IL6,MRC1,SPINT2,TNF,VIM	554 (15)
Mt2	-1.612	other	Inhibited	-2	bias	0.00638	CCND1,CEBPA,FOS,Gstt1,IL6,MEST,TNF	572 (15)
ITGA5	0.289	transmembrane receptor		0.371	bias	0.00647	CCND1,CHRD,ENPP2,FOS,GAS1,GJA1,HOXB9,IGFBP2,IL6,PLAUR,TNF	657 (20)
NFATC4	1.883	transcription regulator		0.763		0.00656	ALPL,BDNF,COL1A1,CTSK,NFATC1,Nppb,PPARG,TNF	639 (12)
INHBB	1.659	growth factor		0.912		0.00656	GUCA2A,LOXL3,MMP3,PDX1,SOSTDC1,THBS2,TNC,Wfdc18	319 (7)
SFRP4	1.14	transmembrane receptor		-1.026	bias	0.00656	AREG,CCND1,CDH1,GREM1,GREM2,INHA,SFRP2,VIM	517 (7)
COP1	-0.201	enzyme	Inhibited	-2.158		0.00656	C3,ICAM1,Ifitm1,MMP3,Mx1,PPARGC1A,Saa3,TRIB3	493 (9)
urethane		chemical toxicant		-0.829		0.00656	ARG1,CCND1,Cdkn1c,CDKN2A,CDKN2B,CEBPA,RB1,SFRP1	808 (20)
ramipril		chemical drug		-1.414	bias	0.00656	ACE2,CCN2,COL1A1,COL1A2,COL4A5,IL6,TIMP2,TNF	699 (14)
R-WIN 55,212		chemical reagent		0.283		0.00656	CCND1,E2F2,ICAM1,IL6,RB1,TNF,TP53,VCAM1	760 (20)
CASR		G-protein coupled receptor		-0.05		0.00664	CASP14,CCND1,CDH1,CENPS/CENPS-CORT,CISH,Clec2d (includes others),DSG1,GATA3,IGFBP3,IGFBP5,ISG15,ITGB7,KLK13,LGALS1,LORICRIN,NFATC1,ODC1,PDLIM2,PPARG,PTHLH,RB1,SERPINB6,THBD	778 (25)
n-nitrosomethylbenzylamine		chemical toxicant				0.00664	AOX1,CCND1,CDKN2A,CDYL,CIB2,CLDN1,DSC3,FGFBP1,GCLM,GREM1,Gsta4,IDH1,KRT14,LAMB3,LEPR,MGST1,MSN,PCSK9,PRKG2,Pvr,RB1,RGS17,SCEL
MAP2K6	3.918	kinase		1.441	bias	0.00672	ACTA2,BGN,CCND1,COL10A1,CRYAB,ESR1,ESR2,IL13RA2,IL6,ISG15,MMP3,PPARGC1A,PTH1R,SLC2A4,TNFSF10	689 (23)
PLG		peptidase	Activated	2.013	bias	0.00672	ARG1,BDNF,CAV1,COL1A1,COLEC12,CYP2S1,EDNRB,F3,IL1A,IL6,MRC1,PLA2G5,RAPGEF3,TNF,TNFRSF11B	628 (17)
ascorbic acid		chemical - endogenous mammalian		1.194		0.00674	Abcb1b,ACTA2,ALPL,COL1A1,DDIT3,DMP1,DUOX2,IGFBP2,IGFBP3,IGFBP4,IGFBP5,IL6,MGP,PCSK9,PMP22,PPARA,TNF,TNFRSF11B	658 (20)
KL		enzyme	Inhibited	-2.571		0.00675	ACTA2,AXL,CCN2,CCND1,DDIT3,ICAM1,IL6,MMP7,SLC34A1,TNF,TNFRSF11B,WNT3A	803 (25)
mir-24		microRNA		-0.021		0.00675	CDKN2B,GATA3,IL6,JPH2,NET1,PDX1,PRDM1,RORA,RORC,Tcf7,TNF,TRIB3	643 (12)
carbonyl cyanide m-chlorophenyl hydrazone		chemical toxicant		1.408	bias	0.00675	BMP6,CLDN1,DDIT3,GDF15,GNG11,IL13RA2,IL1A,LAMB3,LCN2,RND3,TMEM154,ZFP36L1	536 (10)
ELOVL3		enzyme		-0.087		0.00683	ACAT2,ACOX2,COL1A2,Defb1,ENO1,EPAS1,IDI1,IQGAP2,LUM,MVD,Pbp2,PLA2G4E,Skint3 (includes others),VNN1
mir-133		microRNA		-0.695	bias	0.00683	CCN2,CD34,CNN1,FBN2,FSCN1,HCN2,KCNH2,MSN,PPARG,SLC2A4,TAGLN,TNF,TNFSF10,VCAN	500 (11)
TGFBR1	0.618	kinase	Activated	3.123		0.00705	ACTA2,BGN,CCN2,CCND1,CDH1,COL1A1,COL1A2,FBLN5,FMOD,GAS1,HAS2,MST1R,NFATC2,PDGFB,TAGLN,VIM,WNT11	789 (17)
MALAT1	-0.903	other		-0.507		0.00713	CDH1,CNFN,COL10A1,IL6,ISG15,KRT16,Krt90,LIPM,PRR9,VIM	561 (12)
lipid		chemical - endogenous mammalian		0.6		0.00713	AR,CCK,FDPS,HSD3B7,IL6,PCK2,PPARA,RARRES2,SLC2A4,TNF	713 (22)
MITF	-1.478	transcription regulator		1.928	bias	0.00728	ALCAM,C8orf44-SGK3/SGK3,CDKN2A,CHKA,Cma2/Mcpt9,COL1A1,CTSK,EDNRB,ESRP1,FBXO32,FMOD,FOS,FRMD4B,GPR137B,GREB1,HES1,HPGD,INPP4B,ITPKB,KAZN,Mcpt2,MGP,NGFR,Nppb,PLA1A,PPARGC1A,RAB27A,SCD,SEMA6A,SERPINF1,SLC19A2,SORT1,SOX13,SOX5,SOX6,TMCC2,TP53,TPH1	600 (12)
NR1I2		ligand-dependent nuclear receptor		1.816		0.00732	Abcb1b,Aldh1a7,CCL24,CEBPA,CYP39A1,CYP3A5,FGF19,GOT1,Gsta4,GSTA5,GSTM5,IL33,IL6,ITGB6,LCN2,MGP,MGST1,NR1H4,PAPSS2,PPARA,PPARG,SCD,SORL1,SPHK1,TNF,TNFRSF11B,UGT1A1,UGT1A3,UGT1A4,UGT1A6	820 (21)
5-O-mycolyl-beta-araf-(1->2)-5-O-mycolyl-alpha-araf-(1->1')-glycerol		chemical - endogenous non-mammalian		0.62	bias	0.00734	ADAD2,ADAMTS5,CD1D,ICAM1,IFIT1,IL1A,KYNU,LRP12,NT5E,PCSK5,RND3,SERPINB2,SPHK1,TNF,TRAF1,VCAM1	613 (10)
EGR2	-0.739	transcription regulator		0.846	bias	0.00745	CHKA,COL11A1,DLG3,FOS,GATA3,GNB4,IL1A,ITGAE,KITLG,MAP2,MPZ,NCMAP,PDE7A,PLCL1,PMP22,Pou3f1,PRDM1,PTHLH,ROBO1,RORA,RORC,S100A1,SCD,TGFBR3,TNFSF10,ZBTB16	717 (18)
CTBP2	-0.27	transcription regulator				0.00749	CCND1,CDH1,JUP,KRT8,MDM2,OCLN	599 (15)
PTGIS	-1.364	enzyme		1.455		0.00749	CXCL6,DDIT3,ICAM1,IL6,NOS1,TNF	638 (18)
N4BP1	0.308	enzyme		-1.008		0.00749	CXCL6,HLA-A,IL6,TNF,TP73,TRAF3	620 (12)
TEK	0.943	kinase		0.651	bias	0.00749	ANGPT1,APLN,IL1A,IL6,TNF,TUBB3	561 (18)
PDCD4	3.175	other		0.109	bias	0.00749	CDH1,IL6,LOX,MMP3,PDCD4,PLAUR	725 (17)
DBP	-0.631	transcription regulator		0.447	bias	0.00749	AQP4,BCL2L14,CYP3A5,NQO1,PPARA,SCNN1A
MUC4		other		-1.472	bias	0.00749	CCND1,CDH1,ERBB3,KRT18,PRKCG,VIM	755 (21)
vanadate		chemical - other		0.933		0.00749	CCND1,ESR1,ODC1,PGR,SLC2A4,TNF	755 (19)
ganglioside		chemical - endogenous mammalian		0.152		0.00753	ICAM1,IL6,INPP5J,TNF	650 (22)
R 59022		chemical drug		0.152		0.00753	DGKH,IL6,PPARG,SLC2A4	466 (13)
Mir218		microRNA		-0.124		0.00753	DKK2,SFRP2,Tcf7,TOB1
HTR7	0.228	G-protein coupled receptor		1.982	bias	0.00753	COL23A1,FOS,IL6,TNF	462 (18)
Hoxa11os	4.131	other		1.961	bias	0.00753	FSTL1,IL6,PYCARD,TNF	299 (7)
FBXO42	1.047	other		0.762	bias	0.00753	ICAM1,IL6,TNF,VCAM1	534 (14)
DKK3	3.243	cytokine				0.00753	ANGPT1,ATF6,CDKN2B,TAGLN
MKX	-0.297	transcription regulator				0.00753	COL1A1,COL1A2,SOX5,SOX6
KDM4B	0.723	enzyme		-0.132	bias	0.00753	LCN2,LOX,PDGFB,VIM	572 (7)
S100A10	-1.116	other		0.762	bias	0.00753	ASIC1,HCN2,IL6,TNF	533 (22)
AKAP12	-0.008	transporter		1.98		0.00753	ANGPT1,CCND1,CDH1,TNF	652 (21)
mir-338		microRNA		1.044	bias	0.00753	CCND1,CDH1,IL6,VIM	188 (7)
MED15	0.128	transcription regulator		0	bias	0.00753	BBC3,CCND1,CLCA2,KCNK1
HGS	0.8	other		-0.762		0.00753	CDH1,ESR1,FOS,SCNN1A	745 (21)
ARHGAP5	0.212	enzyme		1.98	bias	0.00753	ACTA2,CCN2,COL1A1,LOX	676 (11)
DES	2.385	other				0.00753	ANKRD1,HOXA10,KRT18,KRT8	420 (7)
RPL11	0.194	other		-0.882		0.00753	E2F2,IGF2BP1,PDCD4,TP53	513 (7)
RTKN	0.427	other		-0.132	bias	0.00753	CDH1,FOS,TNF,VIM	483 (12)
SGCD	-5.245	other		0		0.00753	LOX,LOXL1,LOXL3,SGCB
EDA		cytokine		1	bias	0.00753	AREG,EPGN,PTHLH,WNT10A
SERPINH1	-0.535	other		-0.811	bias	0.00753	CDH1,COL1A1,DDR2,VIM	625 (17)
cyclopentenone		chemical reagent		1.103		0.00753	CCND1,GSTA5,HSPA1A/HSPA1B,ICAM1	311 (8)
BQ 123		biologic drug		-1.98	bias	0.00753	CCN2,GJA1,IL6,TNF	645 (19)
3-beta,17-beta-androstanediol		chemical - endogenous mammalian		-0.106		0.00753	AR,BBC3,CDH1,ESR1	804 (10)
roscovitine		chemical drug		-0.689		0.00758	AR,CCN2,CCND1,CEBPA,MDM2,PDX1,PPARG,Raet1d/Raet1e,RB1,TP53,UGT1A1	764 (19)
PRKAA		group		-0.368		0.00758	AR,CCN2,CDH1,CLDN1,FKBP5,IL6,PPARGC1A,TMPRSS2,TNF,TP53,VIM	761 (20)
Hedgehog		group		0.922		0.00758	BDNF,CCND1,CDKN2A,GAS1,HES1,KRT19,MYCL,PDX1,PRKCI,SOX2,TP53	342 (7)
zVAD-FMK		chemical - protease inhibitor		0.198		0.00758	ARG1,BBC3,FOS,GATA3,IL6,MDM2,MRC1,TNF,TP53,TP73,VCAM1	550 (14)
PRKCE	-1.984	kinase		-0.127	bias	0.00759	ACTA2,ADAM12,AMIGO2,CAV1,CCND1,CDH1,Cxcl9,FOS,IL2RG,IL6,ODC1,PDCD4,PRKD1,TNF,VCAM1	651 (20)
FGF7	1.401	growth factor		0.992		0.00759	ACTA2,AQP5,CCND1,CDKN2A,CEBPA,COL1A1,FABP5,FGFR2,HAS2,HAS3,IL1A,LPCAT1,NFE2L3,SCD,TP53	683 (19)
Growth hormone		group	Activated	2.131		0.00761	APLP1,BMP2,C3,CCND1,CDH1,CDH3,CEBPA,CISH,COL18A1,COL1A1,DDIT3,FDPS,FKBP5,FOS,FOSL2,GDF15,GSTM5,HES1,ICAM1,IGFBP2,IGFBP3,IGFBP5,IGFBP6,IL6,LEPR,NDRG2,NOX4,PPARA,PPARG,PPP1R15A,S100A4,SCNN1A,Serpina3g (includes others),TNF,TNFSF10,TSC22D1	739 (20)
staurosporine		chemical drug		-1.499		0.00761	ARC,BBC3,BTG2,CCND1,COL1A1,COL1A2,ERBB3,FOS,FOSL1,ICAM1,IGFBP5,IL6,ISG15,KRT14,MICB,NQO1,ODC1,PRDM1,PTH1R,TGFBR3,TP53	721 (21)
RAG2		enzyme				0.00771	ALOX15,CD5,Cxcl9,IL6,ISG15,Mx1,NT5E,SPRR1A,TNF	597 (10)
RIPK2	0.192	kinase		1.497		0.00777	DGAT2,GPR84,ICAM1,IL33,IL6,MARCKSL1,PNPLA2,PPARA,PPARGC1A,SCD,SLC27A1,TNF,TRAF1,VCAM1	755 (18)
MAP2K3	-0.304	kinase		1.239	bias	0.00777	COL10A1,COL1A1,COL1A2,CTSK,DDIT3,ICAM1,IL6,ISG15,MMP3,NFATC1,PPARGC1A,SLC2A4,TNF,TNFSF10	706 (15)
silibinin		chemical drug		1.017	bias	0.00777	BBC3,CCN2,CCND1,CDH1,IGFBP3,IL6,KRT18,MMP3,NFATC1,PLAUR,PROM1,TIMP2,TP53,VIM	666 (18)
hexachlorobenzene		chemical toxicant		-0.653	bias	0.00781	A2M,A3GALT2,ASNS,CP,ELF3,EMP3,GPX2,LAMC2,LCN2,MRC1,SLC34A2,VIM
PTN	7.24	growth factor		1.772	bias	0.00781	ACAT2,BDNF,CEBPA,COL10A1,DGAT2,PC,PPARA,PPARG,PTPRZ1,RXRA,SCD,SOAT2	520 (7)
IL32		cytokine		1.22		0.00781	BBC3,CTSK,ICAM1,IL1A,IL6,MMP3,NFATC1,THBD,TNF,TNFRSF11B,TP53,VIM	650 (16)
SREBF1	-0.731	transcription regulator		0.78	bias	0.00781	AK4,ALDOC,ALOX12,AR,CAP2,CEBPA,CXADR,CYP7B1,DEPP1,EHHADH,FABP5,FADS1,FADS2,FAM189B,FBXO32,FDPS,GPX3,HSPA1A/HSPA1B,IDH1,IDI1,IL1A,IL6,MVD,NSDHL,P4HA2,PCK2,PCSK9,PDX1,PIK3R3,PLA2G3,PMP22,PPARG,PTGDS,RBP1,SCD,SORBS3,STARD4,TNF,TP53,VGF	601 (17)
SOD1	-0.118	enzyme		-1.18		0.00781	ADORA2B,ALDOC,ARC,ATP1A3,CCND1,CDKN2A,COL1A1,CP,CRYAB,DPYSL3,DSG3,FGF19,FOS,FOSL2,GCLM,GPX3,GRIN1,GSTA5,GSTM5,HCN2,HLA-E,ICAM1,IL6,ISG15,KCNAB2,Mt3,MYBL1,NETO2,NOS1,OAS2,OCLN,PLA2G4E,PLCB4,PRRX1,Tmsb4x (includes others),TNF,TP53,TUBB4A,VCAM1,VGF	609 (19)
MYF6		transcription regulator		0.332		0.00784	APLN,BDNF,CCL24,Cxcl9,ERFE,FSTL1,IGFBP3,IL1A,IL1RN,IL33,IL6,LTF,MMP7,PDGFB,RECK,SERPINF1,TNF,TNFRSF10A,TNFRSF11B
PDX1	-10.534	transcription regulator		-1.421		0.00787	ACE2,ARL4D,ASNS,ATF5,BBC3,Calcb,CCND1,CKMT1A/CKMT1B,COL1A1,F3,GALNT18,GCLM,GOT1,HAP1,IDH1,IGFBP3,IL6,KRT18,KRT8,MAP2,NQO1,PAPSS2,PC,PDX1,PDZK1IP1,Pmaip1,PPP2R2C,PTPRF,TGFBR3,TRIB3	813 (22)
H-151		chemical reagent				0.0079	IL6,Mx1,TNF
styrene		chemical toxicant				0.0079	IL6,TNF,TNFSF10
ATPase		group				0.0079	CTSK,ICAM1,VCAM1
Jun-ATF2		complex				0.0079	CCND1,IL6,TNF
BCAS2	0.191	other				0.0079	BBC3,MDM2,TP53	444 (7)
ATOH7		transcription regulator				0.0079	FGF19,SOX11,SOX4
BPI		transporter				0.0079	ICAM1,IL6,TNF	735 (11)
BUD23	-0.271	enzyme				0.0079	FKBP5,IL6,TSC22D3	297 (7)
DRD1/5		group				0.0079	BDNF,FOS,NAT8L
sGC		complex				0.0079	ARC,BDNF,FOS	545 (17)
TXLNG	0.023	other				0.0079	PPARGC1A,PRKAA2,SCD
benzenesulfonic acid		chemical reagent				0.0079	IL1A,IL6,TNF
MYBBP1A	-0.102	transcription regulator				0.0079	MMP3,PPARGC1A,SLC2A4	486 (10)
PGRMC1	0.346	transmembrane receptor				0.0079	LCN2,PAQR7,PGR
miR-147 (and other miRNAs w/seed UGUGCGG)		mature microRNA				0.0079	DEPTOR,IL6,MMP3
miR-1285-3p (and other miRNAs w/seed CUGGGCA)		mature microRNA				0.0079	CDH1,TP53,VIM
miR-292b-5p (and other miRNAs w/seed CUCAAAA)		mature microRNA				0.0079	AR,BCL11A,BCL11B
RIPK4	6.409	kinase				0.0079	GRHL3,IRF6,OVOL1
RBM14	-0.128	transcription regulator				0.0079	CCND1,HTRA1,SOX6
PSAP	0.356	other				0.0079	CCND1,ESR1,GBA	551 (11)
ARLNC1		other				0.0079	AR,FKBP5,STEAP2
CEL		enzyme				0.0079	CCND1,CDH1,TP53	315 (7)
HEPH	2.889	transporter				0.0079	CNTNAP1,CP,HEPH
SENP6	-0.096	peptidase				0.0079	ICAM1,IL6,TNF	311 (9)
Tmsb4x (includes others)	2.044	other				0.0079	CDH1,ICAM1,Tmsb4x (includes others)
COL11A1	5.88	other				0.0079	ACTA2,COL11A1,DDR2	210 (7)
SPRY4	-0.948	other				0.0079	CNN1,ISG15,TAGLN
Wfdc17	-0.53	other				0.0079	ARG1,IL6,MRC1
Brd4		kinase				0.0079	CCN2,FOS,Nppb
RFXANK	0.516	transcription regulator				0.0079	COL1A2,EPHA3,HLA-A
MI-773		chemical drug				0.0079	BBC3,MDM2,TP53	444 (7)
gabapentin		chemical drug				0.0079	FOS,NCAM1,NOS1	336 (7)
2-cyclohexen-1-one		chemical - endogenous non-mammalian				0.0079	GSTA5,ICAM1,VCAM1
ifenprodil		chemical drug				0.0079	BDNF,GRIN1,PRKCG
tranexamic acid		chemical drug				0.0079	F3,IL1A,TNF	379 (12)
bupropion		chemical drug				0.0079	IL6,TNF,TNFRSF10A	511 (13)
grepafloxacin		chemical drug				0.0079	IL1A,IL6,TNF	458 (7)
angustibalin		chemical - endogenous non-mammalian				0.0079	ACTA2,COL1A1,COL1A2	513 (7)
FT671		chemical - protease inhibitor				0.0079	BBC3,MDM2,TP53	475 (10)
HDAC4	-1.254	transcription regulator		-0.588		0.00791	ARC,BDNF,CACNA2D1,CAP2,CCND1,CDKN2A,CNTN1,FOS,FOSL1,IL6,ISG15,MPZ,Nppb,PMP22,PPM1E,SERPINB2,SLC2A4,SLC8A1,SNAP25,TAGLN,TNF,TSPAN7,VCAM1	754 (25)
mir-31		microRNA		-1.86	bias	0.00811	AR,BAMBI,DACT3,EGLN3,KRT16,KRT17,SATB2,TIAM1
H2BC17		other				0.00811	ACSS1,CCDC112,DOCK11,MEGF9,OSBPL6,SPTLC3,TNIK,ZFHX4
clodronic acid		chemical drug		0.115		0.00811	ARG1,FOS,ICAM1,IL6,MRC1,TNF,VCAM1,WNT3A	829 (17)
ceramide		chemical - endogenous mammalian		1.424		0.00811	ABCA12,CD1D,COL1A1,FOS,ICAM1,IL6,SFRP1,TP53	665 (20)
Smad		complex	Activated	2.096	bias	0.00814	CCN2,CDKN2A,CDKN2B,COL1A1,COL1A2,PTHLH,WNT5A	605 (15)
POLR2M	1.526	other		1.195	bias	0.00814	AEN,BTG2,CCND1,MDM2,PHLDA3,TNFRSF10A,ZMAT3
LRPAP1	-0.042	other		1.107		0.00814	ACTA2,CDH1,DDIT3,F3,IL6,SORL1,TNF	655 (20)
POM121/POM121C	-0.553	other		0.404		0.00814	CDKN2B,KCNQ5,NGFR,NUP210,SLC27A1,SNN,TMPRSS2	462 (7)
BTG2	2.359	transcription regulator		-1.165		0.00814	BTG2,CCND1,MMP3,NCAM1,NOX4,NQO1,PDX1	794 (20)
ginsenoside Rb1		chemical - endogenous non-mammalian		0.492		0.00819	FOS,PGR,PPARA,PPARGC1A,SCD	777 (18)
exisulind		chemical - endogenous mammalian		1.338		0.00819	ALOX15,NQO1,PGR,PRKG1,SAT1
TGFBR		group		1.387	bias	0.00819	ACTA2,ADAMTS1,CDH11,NOX4,WNT5A	586 (20)
Rac		group		0.689		0.00819	BMP2,CCND1,FOS,IL6,THBS2	615 (18)
NAE1	-0.351	enzyme		-1		0.00819	CCND1,CDKN2B,RB1,SFN,TP63	444 (7)
LOXL2	0.144	enzyme				0.00819	CDH1,ESR1,OCLN,RAMP3,VIM
MYOF	-1.186	other		1.573	bias	0.00819	CEBPA,IL6,NFATC1,PPARA,PPARG	412 (7)
miR-148a-3p (and other miRNAs w/seed CAGUGCA)		mature microRNA	Inhibited	-2.178	bias	0.00819	ACTA2,COL1A1,DNMT3B,IL6,TNF
F10	0.243	peptidase		1.287	bias	0.00819	CCN2,F3,ICAM1,IL6,VCAM1	461 (17)
LCOR	-0.584	transcription regulator		-1.455		0.00819	CDH1,ESR1,FKBP5,IGFBP4,TFPI2
RBP3		transporter		0		0.00819	DDIT3,IL22RA1,IL23R,RIPK3,TNF	506 (7)
HOXA4	0.378	transcription regulator		1.245		0.00819	ACTA2,ANKRD1,CCN2,CCND1,TAGLN	406 (10)
oxonic acid		chemical drug		0.447	bias	0.00819	AREG,CCN2,CYP3A5,ICAM1,VCAM1
metoprolol		chemical drug		-1.342	bias	0.00819	AQP1,AQP4,GJA1,IL6,THBS4	129 (5)
spermine		chemical - endogenous mammalian		0.169		0.00819	IGFBP2,IL6,ODC1,SAT1,TNF	697 (24)
Cd2+		chemical toxicant				0.00819	Abcb1b,CCND1,DDAH1,DDIT3,FOS	702 (21)
HDAC5	-0.028	transcription regulator		0.24		0.00823	ACTA2,ARC,HES1,MPZ,PMP22,PPARA,PPARG,PPARGC1A,PTPN13,SCD,SLC2A4,SLC8A1,TAGLN,TNF,TP53,TUBB3	844 (24)
Creb		group		1.072		0.00838	ACTA2,ANTXR1,ANTXR2,AREG,ARG1,ARHGEF9,BBC3,BCL2L15,BDNF,BMP6,CCK,CCND1,CEBPA,CLMN,COX6A2,EDAR,EPHA3,FOS,FOSL1,FSCN1,GDA,GJA1,GNB4,HAS2,HES1,HPGD,IL6,INHA,ITGA10,MICB,NMNAT2,PCOLCE,PDE3B,PPARG,PPARGC1A,PRKAA2,PTHLH,Saa3,SERPINB2,SESN3,SLC2A4,SLC8A1,SOX12,SOX4,SSTR2,TNF,TNFRSF11B	795 (21)
Collagen type II		complex		0.324		0.00844	BMP2,BMP6,CCL24,FZD2,IL1A,IL1RN,IL6,MMP7,TNF,TNFSF10	768 (23)
methyl methanesulfonate		chemical toxicant		-0.152	bias	0.00844	BTG2,CDH1,CDKN2A,DDIT3,MDM2,PHLDA3,ST14,TP53,TP53INP1,VIM	648 (17)
KLF11	-0.076	transcription regulator		-0.401		0.00851	ACTA2,ADAMTS1,CAV1,CCN2,CHRNB1,COL1A2,GREM1,IL13RA2,ITGB6,LOX,MMP3,PCK2,PDGFB,PDX1,PLA2G4A,PPARG,PPARGC1A,SMAD6,THBS2,TIMP2,TIMP3,TNF	583 (16)
MAP2K1/2		group		-0.294		0.00855	ARC,BDNF,C3,CCN2,CCND1,CDH1,DDIT3,FOS,FOSL1,GJA1,PGR,PPARA,PRKCI,TNF,VIM	685 (20)
GNAS	-0.409	enzyme		0.071		0.00855	ADAMTS1,ALPL,ARL4D,CEBPA,FOS,FOSL2,IL6,INHA,PDE4A,PLA2G4A,PPARG,PPARGC1A,PTHLH,SLC34A1,VGF	767 (21)
(+)-MK-801		chemical drug		0.355		0.00855	ARC,BDNF,CCND1,CNTN2,FOS,GJA1,GRIN1,HSPA1A/HSPA1B,ICAM1,INPP4B,NGFR,NPTXR,PTPRF,SSTR2,TP53	818 (25)
miR-27a-3p (and other miRNAs w/seed UCACAGU)		mature microRNA		-0.971	bias	0.00884	ADORA2B,BBC3,CYP1B1,ODC1,Pmaip1,PNPLA2,PPARG,RXRA,SLC2A4,ST14,THRB
IRF9	0.82	transcription regulator		-0.378		0.00884	CDH1,Cxcl9,Ifi47,IFIT1,IL1A,IL6,ISG15,OAS2,Tgtp1/Tgtp2,TNF,TNFSF10	524 (12)
SB 216763		chemical drug		0.792	bias	0.00884	CCN2,CCND1,FSCN1,IL6,PRDM1,RND3,SCD,SOX2,TAGLN,TNF,TNFSF10	717 (24)
NFATC1	-2.586	transcription regulator		0.384	bias	0.00893	CCND1,COL10A1,COL1A1,CTSK,CYP1B1,FKBP11,GPC6,ICAM1,IL33,IL6,NFATC1,NOX4,NQO1,PDX1,PPARG,PRDM1,RORC,TNF,TNFSF10,VCAM1	715 (19)
GHR	-0.974	transmembrane receptor		-1.601		0.00899	ACTA2,CCND1,CISH,COL1A1,IGFBP2,IGFBP3,IGFBP4,IL6,PPARG,Serpina3g (includes others),TNF,TP53	741 (19)
Bay 11-7082		chemical - kinase inhibitor		-1.389	bias	0.0092	Abcb1b,CAVIN3,CCND1,F3,GJA1,GLRB,HSH2D,ICAM1,IL17RB,IL6,MMP7,S100A4,SIX4,TNF,TNFSF10,VCAM1	567 (16)
KDM2B	0.423	enzyme	Inhibited	-2.2		0.00925	BDNF,CDKN2A,CDKN2B,CRABP2,FOS,RIPK3,SFRP2,SOX7,TP53	866 (27)
LHCGR		G-protein coupled receptor		0.14		0.00925	ADAMTS1,AR,EDN2,ESR1,ESR2,IGFBP4,INHA,PGR,PRKG2	671 (20)
PAK2	-0.081	kinase		1		0.00925	IGFBP3,IGFBP5,MDM2,NOX4,PGR,PLAUR,PRKCI,SMARCA2,TAGLN	513 (12)
ritanserin		chemical drug				0.00946	BDNF,PRKD1
isopropyl thiogalactoside		chemical reagent				0.00946	CCND1,CDKN2A
ginsenoside Rh2		chemical - endogenous non-mammalian				0.00946	FOS,NFATC1	297 (7)
loganin		chemical - endogenous non-mammalian				0.00946	CCN2,NOX4	278 (7)
LXM-10		chemical reagent				0.00946	IL6,TNF	488 (11)
P5091		chemical reagent				0.00946	CDH1,VIM	621 (12)
MS049		chemical reagent				0.00946	CDH1,VIM	621 (12)
PLA2		group				0.00946	FOS,TNF	725 (24)
endrin		chemical toxicant				0.00946	CEBPA,PPARG	383 (7)
4',6,7-trihydroxyisoflavone		chemical - endogenous non-mammalian				0.00946	ESR1,ESR2	437 (7)
6-hydroxy-enterolactone		chemical - endogenous mammalian				0.00946	ESR1,ESR2
nitrosomethylurethane		chemical reagent				0.00946	CCND1,TP53
OR51E2		G-protein coupled receptor				0.00946	AR,CDH1	436 (7)
RAD54L2	-0.338	transcription regulator				0.00946	AR,Rhox5	460 (7)
UBE2W	-0.705	enzyme				0.00946	Krt10,LORICRIN
PDZD11	0.485	other				0.00946	NECTIN1,NECTIN3
STEAP1	-2.928	transporter				0.00946	CEBPA,PPARG
GSTZ1	-0.05	enzyme				0.00946	GSTA5,NQO1
REM2		enzyme				0.00946	CCND1,CDKN2A	399 (7)
OSI-027		chemical drug				0.00946	BBC3,CCND1	114 (3)
GPR4	0.252	G-protein coupled receptor				0.00946	ICAM1,VCAM1	239 (7)
ADNP	0.741	transcription regulator				0.00946	TNF,TP53
METTL8	0.236	enzyme				0.00946	CEBPA,PPARG
lauroylcarnitine		chemical - endogenous mammalian				0.00946	CLDN1,CLDN4
SETD4	2.122	other				0.00946	IL6,TNF
VENTX		transcription regulator				0.00946	CCND1,CDKN2A	663 (12)
C1QTNF4		other				0.00946	IL6,TNF	269 (7)
PLEKHA7	1.832	other				0.00946	NECTIN1,NECTIN3
STEAP2	-2.488	enzyme				0.00946	CEBPA,PPARG
ARL11	0.32	other				0.00946	IL6,TNF	561 (14)
ETS-ELK1		complex				0.00946	CCND1,CDKN2A
ganglioside GM3 (d18:1/18:0)		chemical - endogenous mammalian				0.00946	IL6,TNF
ganglioside GM3 (d18:1/20:0)		chemical - endogenous mammalian				0.00946	IL6,TNF
ganglioside GM3 (d18:1/22:0)		chemical - endogenous mammalian				0.00946	IL6,TNF
CLK		group				0.00946	F3,TP53
CTS-1027		chemical drug				0.00946	ACTA2,COL1A1
LEFTY2		growth factor				0.00946	MMP3,MMP7	211 (7)
Raet1b		other				0.00946	HLA-A,TNF
MAPK8IP2		other				0.00946	BDNF,FOS	679 (19)
CELA1		peptidase				0.00946	HLA-A,HSPA1A/HSPA1B
miR-509-3p (miRNAs w/seed GAUUGGU)		mature microRNA				0.00946	AR,NTRK3
miR-758-5p (and other miRNAs w/seed GGUUGAC)		mature microRNA				0.00946	AR,TP53
mir-657		microRNA				0.00946	IL6,TNF
H60a		other				0.00946	HLA-A,TNF
CCNG1	-1.816	other				0.00946	TP53,TP73	553 (10)
MIR5590		microRNA				0.00946	CDH1,VIM
IL1RAPL1		transmembrane receptor				0.00946	IL6,TNF
BCLAF1	-0.057	transcription regulator				0.00946	CCND1,TP53
KRT18	-3.895	other				0.00946	KRT18,KRT7
TBC1D23	0.168	other				0.00946	IL6,TNF
RAMP3	2.929	G-protein coupled receptor				0.00946	FOS,VIM	456 (10)
MIR6869		microRNA				0.00946	IL6,TNF
ADAMTS5	4.236	peptidase				0.00946	BGN,VCAN
CD300E	-0.385	other				0.00946	IL6,TNF
RPLP2	-0.778	other				0.00946	IGF2BP1,PDCD4
MARCKS		other				0.00946	ACTA2,TNF	619 (16)
polysaccharide TA-1		chemical - endogenous non-mammalian				0.00946	IL6,TNF	291 (7)
LY3039478		chemical drug				0.00946	PROM1,VIM
bavachalcone		chemical reagent				0.00946	CDKN2A,RORA
vesnarinone		chemical drug				0.00946	Abcb1b,TNF	420 (7)
PD 173958		chemical drug				0.00946	Flg,LORICRIN
tautomycin		chemical - endogenous non-mammalian				0.00946	AR,RXRA
dilazep		chemical drug				0.00946	F3,TNF
dinophysistoxin 1		chemical toxicant				0.00946	CEACAM1,TUBB3
tropicamide		chemical drug				0.00946	IL6,TNF	556 (15)
barium chloride		chemical toxicant				0.00946	LOX,LOXL1
GSK2656157		chemical drug				0.00946	BDNF,ERBB3
teleocidins		chemical toxicant				0.00946	FOS,ODC1
tyrphostin B56		chemical drug				0.00946	ICAM1,TNF	479 (11)
ceftazidime		chemical drug				0.00946	IL6,TNF
lysophospholipids		chemical - endogenous mammalian				0.00946	CLDN1,OCLN
12(S)-HPETE		chemical - endogenous mammalian				0.00946	IL6,TNF	720 (16)
alpha hydroxy ganglioside GM3 (d18:1/24:0)		chemical - endogenous mammalian				0.00946	IL6,TNF
etoposide		chemical drug	Activated	2.521		0.00956	BBC3,BCL2L14,BDNF,BIN1,CCND1,CDKN2A,CEBPA,CLCA2,COL1A2,CYP3A5,GDF15,GPR132,ICAM1,IL1A,IL6,KCNK1,MDM2,NOTCH3,ODC1,PIK3R3,Pmaip1,REL,SERPINB5,SFN,SPHK1,TNF,TNFRSF10A,TNFSF10,TP53,TP63,TP73	541 (13)
IFI16	1.291	transcription regulator		1.492	bias	0.0096	AREG,CCND1,CDKN2A,E2F2,ESR1,ICAM1,IL1RN,IL6,ISG15,MDM2,MGST1,MTHFD2,Mx1,TNF,VCAM1	512 (11)
methamphetamine		chemical drug		0.22		0.00973	BDNF,FOS,FOSL2,GDA,ICAM1,IL1A,IL6,LGALS1,LYSMD2,NAT8L,NDUFA4,OCLN,TIMP2,TNF,TPH1,UGT8,VCAM1	741 (20)
dextran sulfate		chemical drug		0.165		0.00982	ADA,ADAMTS1,ADORA2B,ARG1,C3,CCN2,CCND1,COL18A1,CXCL6,Cxcl9,ENPP2,GSTM5,ICAM1,IL6,ISG15,MMP3,MRC1,NFATC2,NQO1,OCLN,ODC1,PDGFB,PGF,PIGR,PTN,Pvr,Saa3,SERPINB2,SERPINB5,SOX12,SPHK1,ST14,TGFBR3,THBS2,THBS4,TIMP2,TNF,TP53,UBD,UGT1A1,VCAM1,WNT4	406 (12)
STK11	0.12	kinase		-0.444		0.00982	A2M,ALCAM,ASPHD2,Cabp1,CCND1,CDH1,CEBPA,CNTN1,CXCL6,ENO1,FGFR2,FOSL1,GRIA3,HHIP,IGFBP5,IL1A,IL33,IL6,KLF12,KLHL29,LUM,LYPD3,MMP17,Mt3,NDUFA4,NET1,NPEPL1,NT5E,PCK2,PDGFRL,PPARG,Ppbp,PTPRN,PTPRZ1,RB1,SERPINI1,SORL1,TNFSF10,TTYH1,VIPR2,WNT5A,ZNF462	733 (19)
kawain		chemical - endogenous non-mammalian		-1.761		0.00984	CEBPA,CYP3A5,IL6,PPARG,PPARGC1A,TNF
C9orf72	-1.724	other		0.816		0.00984	EDN2,EDNRB,NDST3,NUP210,PC,SLC1A1
SUCNR1		G-protein coupled receptor		1.633	bias	0.00984	ACTA2,COL1A1,COL1A2,COL5A1,COL5A2,NID1
G-1		chemical reagent		1.206		0.00984	AR,ARC,ESR1,FOS,PAQR7,SLC1A1	668 (15)
CBX1	0.384	transcription regulator		1.274	bias	0.00984	CDKN2A,ITGA7,PROS1,TP53,Zfp345 (includes others),ZNF616	36 (2)
FCER1A		transmembrane receptor		0.089		0.00984	CEBPA,IL6,LAT2,PPARG,SLC2A4,TNF	580 (15)
pevonedistat		chemical drug		-1.48		0.00984	ARG1,DDIT3,ESR1,IL6,SOX2,TNF	715 (17)
CSNK2A1	-0.06	kinase		-1.633		0.00984	CCND1,CDH1,JUP,TP53,TP63,VIM	698 (23)
verteporfin		chemical drug		-0.73		0.00984	CDKN2A,COL1A1,IL33,IL6,TNF,VIM	614 (17)
leptomycin B		chemical drug		-0.896		0.00984	CEBPA,IL6,MDM2,PGR,TNF,TP53	685 (19)
collagenase		group		1.51	bias	0.00991	CXCL6,FOSL1,ICAM1,IL1A,IL6,Saa3,TNF,VCAM1	615 (11)
RNASEL	0.39	enzyme		0.218		0.00991	CDH1,CTSE,FAT4,ISG15,OAS2,PCDH7,TIAM1,TNF	286 (7)
LIN28A		other		1.066	bias	0.00991	AR,CCND1,COL1A1,COL1A2,COL4A5,COL5A2,IGF2BP1,SCD	380 (9)
ROR1	-0.055	kinase		-1.109	bias	0.00991	AXL,CCN2,CDH1,FSTL1,KRT19,MAP1B,MAP2,VIM	580 (15)
ALDH1A2	0.055	enzyme		-0.493		0.00991	ALDH1A3,BGN,CCN2,COL1A2,IGFBP4,ISL1,PCOLCE,TIMP3	238 (7)
MALT1	-0.373	peptidase		1.009	bias	0.00991	IKZF2,IL6,LCN2,NT5E,REL,RORC,TNF,TRAF3	576 (14)
KNG1		other		1.708	bias	0.00991	ASIC1,CCN2,CCND1,COL1A1,COL1A2,FOS,IL6,KLKB1	704 (21)
pitavastatin		chemical drug		-0.096		0.00991	FDPS,FOS,IDI1,MVD,NFATC1,PCSK9,PPARG,TNF	609 (15)
irbesartan		chemical drug		-1.51		0.00991	FHL1,FOS,ICAM1,IL6,SERPINF1,SMAD6,TNF,VCAM1	672 (20)
2-methoxyestradiol		chemical - endogenous mammalian		-0.905		0.00993	AREG,CAV1,F3,GPR161,IL6,LOX,LTF,SOX6,TNF,TP53	737 (20)
ANGPT1	6.314	growth factor		0.223		0.00993	ADAMTS1,ADAMTS5,ALCAM,APLN,CCND1,CDKN2A,ICAM1,Nppb,TNF,VCAM1	667 (20)
PTGS1	-1.644	enzyme		1.178		0.00993	ANGPT1,ARG1,GJA1,GZMH,IL6,JCHAIN,Krt10,PLA2G4A,PTGER4,TNF	687 (20)
DRD2		G-protein coupled receptor		0.838		0.00993	Abcb1b,BDNF,CRYAB,EDNRB,FOS,IGFBP3,ITGB6,NAT8L,PMEPA1,PNPLA2	774 (23)
RXRB	0.253	ligand-dependent nuclear receptor		-1.067		0.00994	ATP1A3,CD109,COLEC12,CRYAB,FSTL1,IGFBP6,IL1A,LCN2,MMP11,PDGFB,PMP22,S100A4,TNF,VCAN	589 (11)
cholecalciferol		chemical - endogenous mammalian		1.095		0.0101	ANKRD22,BDNF,CDH1,CEBPA,COL1A1,CTSK,DKK2,FOS,IGFBP3,IL6,ME1,MYO6,PPARG,PPARGC1A,PTH1R,PTHLH,RB1,RORC,SERPINB8,TNF,TNFRSF11B,TNFSF10
Nfat (family)		group		0.945	bias	0.0102	CCND1,CTSK,DHRS9,DKK3,F2RL1,FHL1,ICAM1,MB,NOX4,PDE3B,PDGFB,RNF128,SAMD4A,TNF,TRAF1,TRAF3,TUBB3,VCAM1
NR1H2	0.059	ligand-dependent nuclear receptor		-0.922		0.0102	AQP1,C3,CDH1,CH25H,Cxcl11,FDPS,IL1RN,IL6,MRC1,PDX1,PNPLA2,PRDM16,RB1,Saa3,SCD,SLC2A4,THRB,TNF
dorsomorphin		chemical - kinase inhibitor		-1.227		0.0102	ACTA2,ARG1,BMPR1B,COL1A1,IL6,PDCD4,PDX1,PNPLA2,POSTN,PPARG,SERPINF1,TNF,TP53
DIO2	1.551	enzyme		-0.791		0.0102	ADGRF4,ARC,Cbr2,CNTN2,CYP1B1,FOS,GFRA1,GREM2,HCN2,HSPA1A/HSPA1B,LUM,MARCKSL1,Naip1 (includes others),Orm1 (includes others),PI15,PPARGC1A,SERINC2,SERPINB2,Sprr1b,Sult1a1,TMEM159,Tnfrsf22/Tnfrsf23,TSPAN18,TUBA3E,Xlr3c (includes others)
PDGF-AA		complex		1.622		0.0102	ACTA2,AREG,BDNF,FOS,IL6,SOX2,VIM
BAHCC1	-0.874	other		0.378	bias	0.0102	FOXA3,HOXB2,HOXB9,IGF2BP2,IGFBP4,SIX4,SOX5
mir-9		microRNA		-1.271	bias	0.0102	AR,CDH1,CDKN2A,FOXG1,MEIS2,PMP22,PRDM1
CTSB	-0.125	peptidase		0.881		0.0102	ACTA2,ARG1,CCND1,COL1A1,PLAUR,SPHK1,TNF
NOS1	2.447	enzyme		1.97		0.0102	ARC,BDNF,FBXO32,FOS,IL1A,IL6,TNF
SRD5A1	-0.433	enzyme		1.633	bias	0.0102	AR,CLDN1,FABP5,KRTDAP,LCN2,PNPLA2,PRKAA2
PARK7	0.76	enzyme		0.61		0.0102	AR,ICAM1,IL6,NOX4,SOX2,TP53,VIM
AZGP1		transporter		1.144		0.0102	CCND1,CDH1,DSP,FBXO32,KRT19,PNPLA2,VIM
alpha-tocopherol		chemical drug		-0.24		0.0102	CCN2,HSPA1A/HSPA1B,IL1A,IL6,PPARG,TNF,TP53
inosine		chemical - endogenous mammalian		0.724	bias	0.0103	A2M,ALCAM,ANTXR2,C1S,C3,EMP3,L1CAM,SERPINB1,SERPING1,TNF,VIM
nicotine		chemical drug		0.233		0.0103	BDNF,BMP2,CACNA2D1,CCN2,CCND1,CNTN1,COL1A1,CTSK,DDIT3,DNM1,ENO1,Flg,FOS,GATA3,GJA1,ICAM1,IL1A,IL6,MMP7,PLAUR,PLCH1,POSTN,PTH1R,PTHLH,SCNN1A,SERPINF1,SLC1A1,TFPI2,TGM1,TNF,TP53,TRPC1,WNT5A,WNT7A
TREM1	0.071	transmembrane receptor		1.331		0.0104	ACKR3,ADORA2B,AREG,ASNS,ATP1B1,CDKN2B,F3,FOSL1,GCLM,GREM1,HES1,HS3ST3B1,HSD3B7,IL6,ISG15,LY9,NRIP3,NT5E,OSGIN1,PGLYRP1,PLAC8,PPARG,RHOU,SERPINB2,SIGIRR,STARD4,TFPI2,THBD,TNF,WNT5A
daidzein		chemical drug		0.371		0.0108	A2M,AKR1C3,ARG1,BDNF,C16orf54,CAV1,CCND1,DNPH1,ESR1,Fcna,HLA-A,IL6,MAL2,NQO1,PIK3R1,PXMP4,TP53
ITCH	0.122	enzyme		-1.667	bias	0.011	CCN2,FOS,IL1A,IL6,NFATC1,PRKG1,SLC1A5,TNF,TP63
CAMK4	1.716	kinase		1.117	bias	0.011	BDNF,CDKN2A,F3,FOS,FOSL2,IL6,PPARGC1A,TNF,TP53
miR-145-5p (and other miRNAs w/seed UCCAGUU)		mature microRNA	Inhibited	-3.039	bias	0.0112	ACTA2,ACTG2,FSCN1,KRT7,MDFI,MDM2,MYL9,NDUFA4,PADI1,PLA2G4A,PROM1,RAB27A,SOX2,TAGLN
sulindac sulfide		chemical drug		-1.816		0.0112	ALOX15,CCN2,CCND1,CYP1B1,DDIT3,GDF15,KRT19,MMP7,MSX1,MTHFD2,NQO1,PGR,PIK3R1,SERPINB5
REL	2.031	transcription regulator		0.302	bias	0.0113	BBC3,CCND1,CDH1,COTL1,Cxcl9,EDARADD,EPHB2,ESR1,F3,FADS2,FOS,FOSL1,FRMD4B,HLA-A,ICAM1,IL6,IRF6,JUP,KCNK6,NFATC1,PCBP4,PPP1R15A,PTGDS,PYCARD,REL,RORC,SLC22A15,SLC25A27,TNF,TNFRSF10A,Tnfrsf22/Tnfrsf23,TNFSF10,TNFSF13B,TTC30B,VIM
LINC00662		other		-0.243		0.0113	ARG1,CCND1,MRC1,TNF,WNT3A
TAP1	0.7	transporter		-1.329		0.0113	CD1D,HLA-A,IFIT1,IL6,TNF
ZBTB33	0.789	transcription regulator				0.0113	BBC3,CDH1,MMP7,S100A4,TNFRSF10A
TBX3	3.001	transcription regulator		-0.562		0.0113	CDH1,CDKN2A,GJA1,SOX2,TP53
COX4I1	0.084	enzyme		-1.387	bias	0.0113	CAPN6,POSTN,SFRP2,SLC24A3,SLC2A4
MFGE8	0.677	other		-0.277		0.0113	CCN2,CCND1,COL1A1,EDIL3,Nppb
KIF1B	0.865	transporter		-0.447		0.0113	CCND1,Cdkn1c,CHD5,EPAS1,GATA3
EDNRA	1.886	transmembrane receptor		1	bias	0.0113	COL1A1,ECE1,FOS,ICAM1,TIMP2
pyridoxine		chemical - endogenous mammalian		-0.447		0.0113	FZD1,SFRP1,SLC6A4,WNT4,WNT6
calpeptin		chemical reagent		0.555		0.0113	AR,ESR1,TP53,TP73,VIM
Na+		chemical - endogenous mammalian		1.387		0.0113	CREB3L1,SCNN1A,SLC12A4,TNF,TP53
cobalt		chemical toxicant		0.9	bias	0.0113	ESR1,ICAM1,IL6,PGR,TNF
CALC		group		-0.249		0.0113	AQP4,FOS,IL33,SORT1,TNF
NPC1	-1.138	transporter		-0.796		0.0114	ALPL,APLP1,CAV1,CCND1,CDYL2,CHKA,CTSK,DDIT3,IDI1,MMP15,MVD,MYLIP,PCSK9,SCD,SULT4A1,TNF
NCOA3	0.378	transcription regulator		1.474	bias	0.0114	ANKRD1,CCDC80,CCN2,CCND1,CEBPA,DDIT3,FGFR2,GJB2,HES1,IGFBP3,Muc1,PARD6B,PGR,PPARG,SLC16A3,TAGLN
NFATC3	-0.064	transcription regulator	Activated	2.961	bias	0.0116	ACTA2,ANGPT1,BMP2,COL1A1,F3,FOS,FOXA1,IL6,MMP3,NFATC1,Nppb,PPARG,TNF
diphenyleneiodonium		chemical reagent	Inhibited	-2.226	bias	0.0116	Abcb1b,ACTA2,BMP2,CLDN4,COL1A1,DDIT3,EPAS1,F3,FOS,GDF15,IL6,NOX4,THBS2
PARP		group		-1.899		0.0116	CDH1,CDKN2A,TP53,VIM
ESRP1	6.142	other		0.9		0.0116	CDH1,ENAH,FGFR2,SOX2
ELOVL2		enzyme		0.218		0.0116	BDNF,CDH1,SCD,TNF
LRRC32	0.672	other		-1.067		0.0116	CDH1,ITGAE,TNF,VIM
BCO2		enzyme				0.0116	HTATIP2,PRKAA2,RNF186,SLC25A30
PPM1D	0.475	phosphatase		0		0.0116	CCND1,CDKN2A,PGR,TP53
KCNN4	-2.463	ion channel		1.131	bias	0.0116	CTSK,FOS,NFATC1,TSC22D3
mir-506		microRNA		-0.958	bias	0.0116	GFRA1,GLI3,TNF,VIM
BIX 01294		chemical reagent		0		0.0116	BDNF,CTSK,IL6,TNF
FRMD6	-0.891	other		0.152		0.0116	BMP2,CCN2,IGFBP3,PDGFB
UGDH	-0.354	enzyme				0.0116	CDH1,FADS2,HAS2,TNC
TEF	0.138	transcription regulator		0.686	bias	0.0116	AQP4,BCL2L14,PPARA,SCNN1A
HOXD9	1.817	transcription regulator				0.0116	GLI3,HOXD10,HOXD11,HOXD13
ACTG1	0.519	other		-1.214		0.0116	ACTA2,CEBPA,CNN1,TAGLN
ARID4B	0.429	transcription regulator		-1.982		0.0116	CLDN3,EMB,INHA,PTGDS
pubchem compound 11368987		chemical reagent		0.068	bias	0.0116	IL23R,IL6,RORC,TNFSF13B
gamma-secretase inhibitor XX		chemical reagent		-1.951	bias	0.0116	FBXO32,HES1,HEYL,NOTCH3
(5-(4-N-methyl-N(2-pyridyl)amino)ethoxy)benzyl thiazolidine-2,4-dione		chemical reagent		-1		0.0116	COL1A1,PC,SCD,SLC27A1
acitretin		chemical drug		-1.067		0.0116	IL6,KRT16,ODC1,TGM1
tridecanoic acid		chemical - endogenous mammalian		1	bias	0.0116	CCK,DDIT3,MXD1,TNC
VitaminD3-VDR-RXR		complex		1.187		0.0116	COL13A1,CST6,HOXA10,IGFBP3,IGFBP5,IGFBP6,MXD1,SEMA3B,SERPINB1,THBD
S100A4	-4.173	other		-1.322		0.0116	CCL24,CDH1,ICAM1,MDM2,OCLN,Saa3,TIMP2,TP53,VCAM1,VIM
MYOD1		transcription regulator		-1.55		0.0117	ACTA2,ANKRD1,ARID3A,BIN1,BNC1,CRYAB,CXCL14,CYP2S1,DES,E2F2,ENO3,ENPP2,ESR1,FOSL1,FSTL1,GREM2,GUCA2A,HAS2,HDAC11,IGFBP5,IRX1,ITGA7,MYCL,MYO5B,PMEPA1,POSTN,PPARGC1A,PRDM16,RB1,RBM38,RECK,RPS6KA2,SDC2,SLC2A4,TEAD2,TGFBR3
IL11	-0.345	cytokine		1.461		0.0118	A2M,ACTA2,Clec2d (includes others),FOS,ICAM1,IL6,POSTN,PPARG,SMAD6,SPHK1,VCAM1,WNT5A
bromodeoxyuridine		chemical drug	Activated	2.709	bias	0.0118	BMP3,F3,IFIT1,IGFBP3,IGFBP4,IL1A,IL6,ISG15,NEU3,TNF,TNFSF10
nitroprusside		chemical drug		1.223		0.0118	BDNF,CAV1,FOS,MDM2,MYH14,PPARGC1A,SLC12A4,SLC1A4,TNF,TNFRSF11B,TP53
SRC	0.511	kinase		-0.194		0.0119	ATP8B1,CAV1,CCND1,CDH1,COL1A2,DOK1,ENO1,F3,FOS,FOSL1,GJA1,HAS2,ICAM1,IL6,KRT18,PLAUR,POSTN,PTH1R,TFPI2,VCAM1,VIM
CHIR 99021		chemical drug		0.563	bias	0.012	CEBPA,HES1,HEYL,IL6,NOTCH3,PPARG,TBX3,TFCP2L1
Fgf		group		-0.374	bias	0.012	CCND1,CDH1,FOS,IL6,LPCAT1,ODC1,Pvr,VCAM1
NCF1	1.173	enzyme	Activated	2.421	bias	0.012	ACTA2,F3,HAS2,ICAM1,Ighg2b,ISG15,THBD,TNF
RCAN1	1.046	other		-0.538		0.012	BDNF,F3,FOS,ICAM1,IL6,OVOL1,TNF,VCAM1
PRKD		group	Activated	2.122	bias	0.012	Cxcl11,CXCL6,Cxcl9,IL6,PPARA,PPARGC1A,SLC2A4,TNF
AHCY	-0.429	enzyme				0.012	BMP2,CD34,FOXA1,HHEX,ICAM1,KRT18,MSX1,VCAM1
PIN1	-0.157	enzyme		0.599		0.012	ATF6,CCND1,DDIT3,EPB41L4B,ESR1,HES1,IL6,MDM2,MMP3,NOTCH3,PGR,PPARGC1A,SLC29A1,TNF,TNFRSF10A
thyroid hormone		chemical - endogenous mammalian		0.923		0.0123	ADRB1,AK4,BDNF,BTG2,CCND1,Cdkn1c,CDKN2A,CDKN2B,CTNND2,DDAH1,FDPS,FOS,IGFBP2,IGFBP3,IGFBP4,INHA,ME1,NUDT7,PIP4K2A,PLA2G5,PPARA,PTGDS,SLC6A4,ST14,TCEA3,THRB,Tmsb4x (includes others),VIM
RARB	1.397	ligand-dependent nuclear receptor		1.366		0.0125	CDKN2A,CDKN2B,CRYAB,DHRS3,GAD2,GJB4,Gm5431,GSDMC,GSDME,HOXA10,ICAM1,Ifi47,IFIT1,IGFBP3,IGFBP6,IL6,LTF,Ly6g6e,Meis1,MMP11,MMP7,Naip1 (includes others),NTN1,Saa3,SOX2,TGM1,THBD
Lymphotoxin		complex		1.501	bias	0.0127	ICAM1,IL1A,IL6,MMP3,TNF,VCAM1
Collagen type IV		complex		-1.067		0.0127	ACTA2,DPYD,PLAUR,PTH1R,TAGLN,TIMP2
PPP4R3A	-0.135	other				0.0127	BCL11B,DLX1,IRX1,IRX3,OTX1,TUBB3
DLX3		transcription regulator	Inhibited	-2.401		0.0127	CDKN2A,ELF3,EPGN,IL1A,PGF,Sprr2d
A-Fos		chemical reagent		-0.417	bias	0.0127	ARC,BDNF,CCN2,EPOP,ODC1,TNF
PPP1R15A	-2.103	other		0.208		0.0127	CCND1,CEBPA,DDIT3,IL6,SNAP25,TNF
butaprost		chemical drug		-0.608		0.0127	CCN2,CDH1,IL23R,IL6,TGFBR3,TNF
CHI3L1	0.294	enzyme				0.0127	ARL4C,CDH1,CDH11,IGFBP5,SERPINB1,SLC39A14,TNC
MEIS2	3.847	transcription regulator	Activated	2.596	bias	0.0127	BMP2,CDH1,CDKN2B,MECOM,OSR2,SOX11,WNT5A
PROCR	-0.88	other		-1.309		0.0127	ANGPT1,CCND1,ICAM1,IL23R,IL6,TNF,VCAM1
CCNC	-0.925	other		0.013	bias	0.0127	CEBPA,PNPLA2,PPARG,PPARGC1A,SCD,SLC2A4,VCAM1
HEY1	1.305	transcription regulator		-1.991	bias	0.0127	ACTA2,BMP2,Cdkn1c,CNN1,MDM2,TAGLN,TP53
carvedilol		chemical drug		-1.791		0.0127	ACTA2,COL1A1,F3,IL6,TFPI,TIMP2,TNF
amino acids		chemical - endogenous mammalian		-0.104		0.0127	ASNS,DDIT3,FOS,IL6,ODC1,RPL32,SLC7A2
geranylgeranyl pyrophosphate		chemical - endogenous mammalian		-0.896		0.0127	BMP2,ICAM1,PPARA,TNF,TP53,TSC22D3,VCAM1
metribolone		chemical reagent	Activated	2.133	bias	0.0127	ADAMTS1,ADRB1,ALDH1A3,ALDOC,AR,ARL6IP1,ATP1B1,ATP6V0E2,BMPR1B,CAPN5,CBR1,CCND1,CDKN2B,CRYAB,CTNND2,ENO1,FDPS,FKBP5,FLVCR2,FOS,FZD8,GDF15,GOT1,GREB1,GRIP1,IDI1,IGFBP5,IL6,INPP4B,KRT18,LIFR,LRIG1,ME1,MMP7,NQO2,NSDHL,PIGR,PMEPA1,PROS1,RAB27A,REEP6,RGMA,Rhox5,RIMS2,SAT1,SLC16A3,SLC1A4,SLC1A5,STEAP2,STK39,TIMP2,TM4SF1,TMPRSS2,TNF,TP53,TSC22D1,UNC13B,VCAN
IFNAR1	-0.003	transmembrane receptor		1.05		0.0128	Apol7e (includes others),ARG1,AXL,BCL2L14,CCL24,CGAS,CH25H,Cxcl11,CXCL6,Cxcl9,HLA-A,HSH2D,IDI1,IL1A,IL6,ISG15,KLK11,Mx1,OAS2,TNF,TNFSF10,TNFSF13B,UBD,VCAM1,VCAN
losartan potassium		chemical drug		-1.889		0.013	ANGPT1,APLN,AQP1,CAV1,CCN2,COL1A1,F3,FOS,GJA1,Ifi47,IL6,MAP2,NOS1,NOX4,PLCB1,POSTN,PPARGC1A,PRDM16,PTH1R,PTHLH,TNF,TUBB3,VCAM1
sorafenib		chemical drug		-0.06		0.013	ACTA2,ATF5,CCND1,CISH,COL1A1,DDIT3,PPP1R15A,TNF,VIM
MAF	0.118	transcription regulator		-0.47	bias	0.013	CRYAB,DEPTOR,GCLM,IDI1,IL12RB1,IL23R,NQO1,NT5E,NUAK1,PRDM1,RORC,TP53,VCAM1
FOXC2		transcription regulator		0.621		0.0134	ACTA2,ADRB1,CDH1,CEBPA,PPARA,PPARG,PPARGC1A,PRDM16,SLC2A4,TP53,VIM,WNT5A
clozapine		chemical drug		1.328		0.0134	Abcb1b,ACAT2,BDNF,FDPS,FOS,FOXA1,GATA3,IL6,PPARGC1A,PRDM16,SCD,WNT5A
pravastatin		chemical drug	Inhibited	-2.176		0.0134	CAV1,COTL1,GJA1,ICAM1,IL6,PCSK9,PGF,PPARA,RHOU,TNF,TP53,Xlr3c (includes others)
testosterone propionate		chemical drug		-0.791		0.0135	AR,FBXO32,FDPS,NOS1,PARM1,PGR,PSCA,PTGDS,SERPINB5,SGK2
TSC22D3	-3.576	transcription regulator		-1.795		0.0136	BBC3,CCND1,CEBPA,COL1A1,DPPA4,EDIL3,ICAM1,IL6,PPARG,TNF,TP53
EIF2S1	-0.298	translation regulator				0.0136	ANGPTL6,CA6,CCND1,CH25H,CHAC1,DDIT3,PPP1R15A,Serpina3g (includes others),SOAT2,TGM1,TRIB3
fatty acid		chemical - endogenous mammalian		0.871	bias	0.0138	ATF6,CCK,DDIT3,FADS1,FADS2,IL6,LEPR,PDX1,PPARA,PPARG,PPARGC1A,PRKAA2,RXRA,SCD,SLC27A1,SLC2A4,TNF,VCAM1,VNN1
MAP3K8	0.554	kinase		1.362		0.0139	Apol7e (includes others),ARG1,ARHGAP22,COLEC12,Cxcl11,FOS,FSCN1,GPR146,GPR160,GPR176,IL1A,IL6,KIF5C,LAD1,MMP3,P2RY1,PGR,PTGER4,REPIN1,SNN,TDRKH,TNF,TSPAN33,Urah
TCF		group		1	bias	0.014	ADGRG2,ARL4A,CCND1,CEACAM1,CTNND2,EPCAM,EPHB3,FOS,GJA1,GPX2,HTRA1,KRT5,MMP7,SFN,SLC1A5,TSC22D1
ciprofibrate		chemical drug		-0.296		0.014	Abcb1b,ACOT2,ADAMTS1,Akr1c12/Akr1c13,CBR1,CEACAM1,CYP7B1,EHHADH,FAM214A,GOT1,HAL,IGFBP2,KRT8,LCN2,LY6D,Orm1 (includes others),PALMD,PPARG,Saa3,SCD,SELENBP1,SLC4A4,TNFRSF10A
cholic acid		chemical - endogenous mammalian		0.548		0.0141	CBR1,CYP3A5,CYP7B1,EHHADH,EPHX1,IGFBP5,KRT18,KRT8,LCAT,MGST1,PPARGC1A,RBP1,TAGLN,VIPR2
STK40	-0.266	kinase		1.117	bias	0.0141	Abcb1b,ACTA2,C5,CEBPA,DES,FUT10,PDPN,PPARG,WNT10A,WNT11,WNT3A,WNT5A,WNT6,WNT7A
HIPK2	-0.208	kinase		-1.651		0.0141	ANK1,BDNF,GSTM5,IL6,MDM2,NQO1,PPARGC1A,RB1,SH2D6,SLC25A37,TMEM45B,TNF,TP53,VIM
minocycline		chemical drug		-1.16	bias	0.0141	BDNF,FOS,GATA3,GJA1,ICAM1,IL1A,IL6,NGFR,NOS1,PDGFB,RGMA,TNF,TP53,VCAM1
ATF3	0.973	transcription regulator		-0.944		0.0141	ADA,ASNS,BBC3,BHLHA15,CCND1,CHAC1,DDIT3,Dnm3os,EPHA1,ICAM1,IL6,KRT19,MDM2,MMP3,NME4,PAPSS2,PPP1R15A,SERPINB5,SPRR1A,TNF,TP53,TP73
CGAS	4.895	enzyme	Activated	2.762	bias	0.0144	ARG1,Cxcl9,IFIT1,IL1A,IL6,ISG15,Mx1,TNF
OSCAR		other		0.186		0.0144	CCL24,FZD2,ICAM1,IL1A,IL1RN,MMP7,TNF,TNFSF10
SKP2	0.741	other	Inhibited	-2.027		0.0144	BBC3,CCND1,CDH1,CDKN2A,ODC1,S100A4,TP73,VIM
miR-24-3p (and other miRNAs w/seed GGCUCAG)		mature microRNA		-1.249	bias	0.0144	ACVR1B,BBC3,CDKN2A,E2F2,IL6,JPH2,Pmaip1,TNF
SND1	-0.102	enzyme				0.0144	ALDH3A1,CDH1,CLDN1,IL13RA2,KYNU,PTPRN2,SOX4,VIM
bryostatin 1		chemical drug		0.443		0.0144	AREG,ARG1,ICAM1,IL2RG,IL6,ODC1,TNF,TRAF1
bardoxolone		chemical drug		0.104		0.0144	ACTA2,CCND1,CEBPA,DDIT3,EPHX1,GCLM,NQO1,NQO2
streptozocin		chemical drug		0.874		0.0145	ALPL,APLN,AR,ATF6,ATP1B1,BBC3,CCN2,CEBPA,COL12A1,COL1A1,DNMT3B,ENO3,ESR1,FBN1,FBXO32,FOS,FOXA1,FOXA3,GPX3,GREM1,ICAM1,IL6,NOS1,NOX4,Nppb,NQO1,NT5E,NTRK3,Pmaip1,PPARG,PPARGC1A,PTPRN,SCD,SLC1A1,SLC2A4,SLC7A2,TNF,TP53,VCAM1,VIM
MCB-613		chemical reagent				0.0147	Cxcl9,IL6,TNF
psychosine		chemical - endogenous mammalian				0.0147	FOSL1,IL6,TNF
nitrite		chemical - endogenous mammalian				0.0147	ICAM1,IL6,TP53
origanum majorana extract		chemical reagent				0.0147	CDH1,ICAM1,PLAUR
pubchem compound 135889696		chemical reagent				0.0147	FOXG1,MAP2,TUBB3
pyrvinium		chemical drug				0.0147	AR,COL1A1,ESRP1
Dynamin		group				0.0147	FOS,IL6,TNF
etretinate		chemical drug				0.0147	KRT16,KRT18,ODC1
tacedinaline		chemical drug				0.0147	ARC,ELF3,FOS
glycitein		chemical drug				0.0147	IL6,MMP3,TNF
FOXQ1	4.752	transcription regulator				0.0147	CDH1,FOXF2,VIM
NSD3	0.259	enzyme				0.0147	CCND1,CDH1,VIM
PIEZO1	-0.929	ion channel				0.0147	IL6,Nppb,VCAM1
KCNK2	-4.097	ion channel				0.0147	ICAM1,KCNK2,VCAM1
HMG20A	-0.28	transcription regulator				0.0147	CDH1,CXADR,KRT18
RGMB	0.4	other				0.0147	CDH1,IL6,LCN2
CCN6		growth factor				0.0147	ADAMTS5,CDH1,ICAM1
ACOT13	-0.053	enzyme				0.0147	PPARA,PPARG,PPARGC1A
Ap2 alpha		group				0.0147	ITGA10,PLAUR,PTGDS
Msx3	-4.048	transcription regulator				0.0147	MRC1,PPARG,TNF
NFE2L3	4.717	transcription regulator				0.0147	BBC3,NQO1,TP53
NEK10		kinase				0.0147	BBC3,MDM2,TP53
mir-708		microRNA				0.0147	AR,IL6,TNF
miR-193a-5p (miRNAs w/seed GGGUCUU)		mature microRNA				0.0147	IL2RG,PIK3R3,TP73
miR-455-3p (miRNAs w/seed CAGUCCA)		mature microRNA				0.0147	ACTA2,CCND1,COL1A1
HTR2C		G-protein coupled receptor				0.0147	BDNF,PPARA,PPARG
EGFL7	1.066	other				0.0147	HES1,ICAM1,VCAM1
NACA	0.127	transcription regulator				0.0147	COL1A1,DMP1,PDPN
LY2109761		chemical drug				0.0147	ATF5,CCND1,CDH1
ABHD5	1.248	enzyme				0.0147	LORICRIN,PNPLA2,TGM1
ORM1		other				0.0147	IL1RN,IL6,TNF
MSLN	-11.009	other				0.0147	IL6,MMP7,TP53
DNAJA1	0.082	other				0.0147	NECTIN3,Rhox5,TP53
SH2B3	-0.4	other				0.0147	IL12RB1,ITGAE,VCAM1
TDG	0.896	enzyme				0.0147	CRABP2,PGR,RBP1
GJA8		transporter				0.0147	ATF6,DDIT3,TRIB3
EFEMP2	0.346	other				0.0147	CCN2,FBLN2,FBLN5
glaucocalyxin A		chemical - endogenous non-mammalian				0.0147	IL6,LCN2,TNF
CBLC	5.23	enzyme				0.0147	DDIT3,NOX4,TNF
HIVEP2	0.744	transcription regulator				0.0147	FOS,GATA3,NFATC1
RAB7A	-0.064	enzyme				0.0147	ACE2,FOS,VIM
AQP5	-7.706	transporter				0.0147	CLDN3,CLDN7,OCLN
Casp12	1.781	peptidase				0.0147	Defb1,MMP3,TNF
Ifna4		other				0.0147	FLT3,ISG15,TP53
SRGN		other				0.0147	CLDN1,SOX2,VIM
CXXC4		other				0.0147	CCND1,EPHB2,MMP7
CG-200745		chemical drug				0.0147	IL6,MYL7,TNF
dec-RRLL-cmk		chemical reagent				0.0147	COL11A1,COL1A2,DMP1
EGTA acetoxymethyl ester		chemical reagent				0.0147	SERPINB2,TNF,TP53
famotidine		chemical drug				0.0147	COL10A1,ICAM1,TNF
SK1-I		chemical reagent				0.0147	ICAM1,Mx1,TNFSF13B
6-cyano-7-nitroquinoxaline-2,3-dione		chemical reagent				0.0147	BDNF,FOS,GFRA1
SPRR5		other				0.0147	LORICRIN,SPRR1A,SPRR3
PK11007		chemical reagent				0.0147	BBC3,DDIT3,MDM2
papaverine		chemical drug				0.0147	BDNF,CAV1,OCLN
catechol		chemical - endogenous mammalian				0.0147	FOS,GSTA5,TNF
GCN2iA		chemical drug				0.0147	ASNS,PDGFB,TNF
ZFA-fmk		chemical reagent				0.0147	C3,IL1A,TNF
18-alpha-glycyrrhetinic acid		chemical - endogenous non-mammalian				0.0147	CDH1,GJA1,PPARG
methyllycaconitine		chemical toxicant				0.0147	FOS,IL6,TNF
3',4',7-trihydroxyisoflavone		chemical - endogenous non-mammalian				0.0147	CCND1,ESR1,ESR2
prexasertib		chemical drug		0.434	bias	0.0147	BTG2,C3,CDKN2B,DDIT3,FOS,GDF15,GRIK5,ICAM1,NGFR,PPP1R15A,TNF,TRAF1,VNN1
TLR2	0.205	transmembrane receptor		1.882		0.0148	ACTA2,ARG1,BDNF,BMP2,CDKN2A,CISH,CXCL6,Cxcl9,FBXO32,FOS,GATA3,GJA1,GRIN1,ICAM1,IL1A,IL1RN,IL33,IL6,ITGB7,MMP3,Nppb,NR1H4,POSTN,PTGFR,SCD,TNF,TNFSF10,TP53,TSPAN33
romidepsin		biologic drug	Activated	2.069		0.0149	CASZ1,CCND1,CDKN2A,CDKN2B,CXADR,Cxcl9,DDIT3,FOS,ICAM1,PLAUR,PRDM1,SERPINB2,SERPINB5,TIMP3,TP53
SMAD7	0.109	transcription regulator	Inhibited	-2.345		0.015	ACTA2,ACVR1B,AREG,BGN,BMP2,BMPR1B,CCN2,CDKN2B,COL1A1,COL1A2,DEPTOR,DNMT3B,G6PC3,ICAM1,ITGA7,KRT8,NET1,PMEPA1,PROM1,SCD,SOX2,TAGLN,TIMP3,TNF
JQ1		chemical reagent	Inhibited	-2.117	bias	0.015	AMPD3,BCL2L14,CCND1,DDIT3,FOS,IFIT1,IL6,ISG15,LAMB3,MACC1,MAP2K6,MAPK13,MVD,OR5V1,PRDM1,RBPJ,RORC,SH2D4A,SIGIRR,Sprr2g,TNF,TNFSF10,TP63,TRAF1
CSF1	-1.224	cytokine		0.964		0.0151	ARG1,AXL,CAPN2,CCND1,CEBPA,COL23A1,CTSK,CXCL6,DAGLA,DUSP9,ENO1,F2RL1,FDPS,FOS,GDF15,HLA-A,IDI1,IL1A,IL6,LGR4,MRC1,MVD,NFATC1,NSDHL,PGR,PPARG,PTPRZ1,SALL3,SERPINB2,SFRP1,SLC16A3,SLC1A5,SLC29A1,SYNGR1,TNF,TP53,VCAM1
LEPR	-2.386	transmembrane receptor		1.707		0.0151	ACE2,ACTA2,ALOX15,CD5,CDKN2A,COL1A1,FOS,IGFBP3,IL1RN,IL6,LCN2,LEPR,MMP3,MMP7,PC,PDX1,PPARA,PPARG,PPARGC1A,QRFP,REPIN1,SLC2A4,SNAP25,TIMP3,TNF,TP53INP1,TSC22D3,VGF
IL27		cytokine		1.498		0.0151	Cxcl11,Cxcl9,DEPP1,FOS,GATA3,HLA-A,HLA-E,HPGD,ICAM1,IFNLR1,IL1A,IL1RN,IL6,MRC1,NFATC1,PRDM1,RORC,TNF,TNFSF10,TNFSF13B,UBD,VCAM1,VIM
salubrinal		chemical reagent		-0.063		0.0152	ATF6,CTSK,NFATC1,SNAP25,TNF
H1-2		other		-0.321		0.0152	CCND1,CISH,DDIT3,HSPA1A/HSPA1B,MDM2
ATG16L1	-0.471	enzyme		-1.4	bias	0.0152	CH25H,FAAH,IL1A,IL6,UPK1A
FCGR1A	0.37	transmembrane receptor				0.0152	C5,F3,IL1RN,IL6,TNF
MAPK10		kinase		1.467		0.0152	BBC3,FOS,IL6,TNF,WNT7A
ACACB	0.505	enzyme		0	bias	0.0152	MVD,PPARA,PPARG,SCD,SLC2A4
aroclor 1254		chemical toxicant		-0.937		0.0152	BDNF,MAP2,NOS1,THRB,WNT7A
IL4R	0.026	transmembrane receptor	Activated	2		0.0152	ALOX15,ARG1,FXYD3,FXYD4,GATA3,IL13RA2,IL31RA,IL6,JCHAIN,PPARG,PPARGC1A,SOX2
NORAD		other		1.492	bias	0.0153	BASP1,CCN2,CHST11,COL5A1,DDIT3,IGFBP3,IGFBP4,SMAD6,TAGLN
HEY2	0.73	transcription regulator		-1.399	bias	0.0153	ACTA2,ALPL,ANKRD1,BMP2,CNN1,IL34,IL6,MYL7,TAGLN
KCNK9		ion channel		-1.066		0.0153	A2M,CTSE,DKK3,LCN2,LYPD3,SLC16A3,SLC6A17,SSTR2,ST6GALNAC5
ARRB1	-0.621	transcription regulator		0.164		0.0153	COL1A1,ENAH,F3,IL6,MMP3,Nppb,TNF,TSC22D3,VCAM1
ABL1	0.218	kinase		1.529	bias	0.0153	BMP2,C3,CAV1,CCND1,DOK1,MDM2,TP53,TP63,TP73
H-7		chemical - kinase inhibitor		-1.043	bias	0.0153	ALDH3A1,AREG,COL1A1,COL1A2,ECE1,FOS,ISG15,MMP3,TP53
choline fenofibrate		chemical drug		1.082		0.0155	CAV1,CDKN2A,F3,PCSK5,PCSK9,PPARA,PTPRF
ELOVL5	-0.072	enzyme		0.242		0.0155	EHHADH,FADS1,FADS2,PNPLA2,PPARGC1A,SCD,TRIB3
miR-181a-5p (and other miRNAs w/seed ACAUUCA)		mature microRNA		-1.951	bias	0.0155	EPCAM,ESR1,HOXA11,PGR,PLAG1,TIMP3,VSNL1
miR-22-3p (miRNAs w/seed AGCUGCC)		mature microRNA		-1.342	bias	0.0155	ACVR1B,BIN1,ESR1,MECOM,MTHFD2,PPARA,ZNF618
SL 327		chemical - protease inhibitor		-1.912	bias	0.0155	ARC,BBC3,CA12,DMKN,FOS,KCNK1,TUSC1
EPHB4	-0.623	kinase		1.589		0.0155	AR,BMP2,FGFR2,GATA3,IGFBP4,KITLG,MYL7,NCAM1,SMAD6,WNT11,WNT5A
FGF10		growth factor		1.105	bias	0.0155	CYP1B1,FGFR2,PDX1,PERP,Saa3,SCD,SOX2,TACSTD2,Tgtp1/Tgtp2,TIMP3,VNN1
DCN	1.369	other		1.102		0.0155	BGN,CCN2,CDH1,COL1A2,FBN1,ICAM1,IL6,TIMP3,TNF,TP53,VCAM1
ADM	-0.453	other		0.182		0.0155	FOS,ICAM1,IL6,NOS1,PPARG,PRKG1,RAMP1,RAMP3,TNF,TNFRSF11B,VCAM1
ADRA1B	-0.679	G-protein coupled receptor				0.0156	ARC,BDNF,CCND1,CSRP2,DDAH1,FABP5,FOS,IL6,LOX,PRRX1
herbimycin		chemical drug		-1.996		0.0156	ARG1,CCN2,CCND1,CDH1,FOS,ICAM1,IL6,TAGLN,TNF,TNFRSF11B
RBL1	1	transcription regulator		-0.52	bias	0.0157	CCND1,Cdkn1c,CDKN2A,F3,FOS,FOXN1,HES1,Krt10,PPARGC1A,RB1,SFRP1,TNF,TP53,TP73
PIAS1	-0.748	transcription regulator		0.283		0.0157	ACTA2,BDNF,CCND1,Cd24a,DNM1,EPHB2,MDM2,NAPB,PRKCG,SCD,TAGLN,UNC13A,UNC13B,UNC13C
lactosylceramide		chemical - endogenous mammalian				0.016	Cxcl11,Cxcl9,ICAM1,IL6,TNF,VCAM1
FUT8	-1.859	enzyme		0.64		0.016	ALDH2,CYP1B1,GAS1,GSTM5,MGAT3,PROM1
SALL4		transcription regulator				0.016	CEBPA,DPPA4,EPCAM,Hmga2,KRT19,SOX2
MAPK8IP1	0.648	other		0.555		0.016	BDNF,CCND1,FOS,GRIN1,IL6,TNF
KIF3A	-0.285	enzyme	Inhibited	-2.2		0.016	ACAT2,COL10A1,FDPS,IDI1,MVD,NSDHL
MAP3K5	0.651	kinase		-0.176	bias	0.016	CCN2,CCND1,IL6,LORICRIN,TGM1,TP53
RPS6KA5	0.534	kinase		-0.099		0.016	CDKN2A,CDKN2B,FOS,FOSL1,IL6,TNF
PBX3	3.618	transcription regulator	Activated	2.449	bias	0.016	C8orf44-SGK3/SGK3,EYA1,HOXA10,IKZF2,Meis1,PBX3
TFF3		other		0.849		0.016	CDH1,CLDN1,CTSK,FOS,OCLN,PPARGC1A
CYP2J2	1.783	enzyme		0.14		0.016	CXCL6,ICAM1,IL6,PPARG,TNF,VCAM1
ELF5		transcription regulator		-1.982		0.016	ESR1,FOXA1,GATA3,KRT8,MEIS2,PGR
arecoline		chemical drug		-0.956		0.016	ACTA2,IL6,PGF,S100A4,SLC2A4,VCAM1
CD24		other		0.663	bias	0.0162	CAV1,CHAC1,EMP3,FOS,GDF15,ICAM1,KLHL22,LAT2,MTUS1,PDGFB,PLCB1,PPP1R15A,SLC4A4,SPHK1,TFPI,TFPI2,TP53,TP53INP1
HAVCR1		other		0.058		0.0162	CHKA,FSCN1,GATA3,HLF,IL6,L1CAM,ODC1,PLAUR,PPP2R2C,RB1,SLC29A1,SMARCA1,TAF9B,TMEM45A,TNF,TP53,TSPAN18,UPK1B
Pro-inflammatory Cytokine		group		0.765	bias	0.0165	CTNND2,F3,ICAM1,IL6,LCN2,LGALS1,MMP3,NR1H4,S100A1,SLC6A4,SPINT1,UBD,VCAM1
miR-21-5p (and other miRNAs w/seed AGCUUAU)		mature microRNA	Inhibited	-3.519	bias	0.0165	ACTA2,BTG2,C8orf44-SGK3/SGK3,IL6,PDCD4,PIK3R1,RECK,SERPINB5,SOX5,TAGLN,TIMP3,TNF,TNFRSF11B
CRH		cytokine		0.955		0.0165	AQP4,AR,BDNF,CXCL6,FOS,HPGD,IL1RN,IL6,KCNMA1,KRT14,NOS1,TNF,TPH1
FOXP3	1.822	transcription regulator		-0.854		0.0165	BBC3,FOS,FOSL2,GATA3,HLA-A,IGFBP4,IGSF3,IKZF2,IL6,ITGAE,LGALS1,LTB4R,NEB,NT5E,NTRK3,PDCD4,PDE3B,PGLYRP1,Pmaip1,PPARG,PRDM1,PTPN22,RORC,SLC16A3,TIGIT,TNF,VIPR1
nitroglycerin		chemical drug		1.98		0.0168	IL6,NOS1,PLAUR,TP73
nicotinamide-beta-riboside		chemical - endogenous mammalian		-0.805		0.0168	ARG1,IL6,PPARGC1A,TNF
Rap1		group		0		0.0168	FOS,MMP3,RECK,SORL1
T 0070907		chemical reagent		1.067		0.0168	CEBPA,COL1A1,COL1A2,TNF
SLC7A5	-1.678	transporter	Activated	2		0.0168	CHAC1,DDIT3,PCK2,TRIB3
PDE3B	2.699	enzyme				0.0168	IL6,PPARGC1A,TNF,TRIB3
ARID4A	0.035	transcription regulator		-1.982		0.0168	CLDN3,EMB,INHA,PTGDS
OSTM1	-0.477	other				0.0168	CTSK,FOS,NFATC1,PRDM1
CNB-001		chemical reagent	Inhibited	-2	bias	0.0168	ASNS,BDNF,DDIT3,PPP1R15A
COL17A1		other		-0.218		0.0168	IL6,TCF7L1,WNT4,WNT5A
Cxcl3	-0.361	cytokine		1.067	bias	0.0168	CCL24,CEBPA,IL33,PPARG
TAS1R3	0.014	G-protein coupled receptor		-0.025		0.0168	CEBPA,PPARG,SLC1A5,SLC5A1
BP-1-102		chemical reagent		-1.982	bias	0.0168	ICAM1,IL1RN,IL6,TNF
pargyline		chemical drug				0.0168	AR,GATA3,MAP2,NOS1
latrunculin A		chemical toxicant		0.152		0.0168	ACTA2,HAS2,IL6,TNF
enterolactone		chemical - endogenous mammalian		0	bias	0.0168	CCND1,ESR1,ESR2,IL1RN
astragaloside IV		chemical - endogenous non-mammalian		0		0.0168	IL6,RORC,TNF,TP53
N,N-dimethylarginine		chemical - endogenous mammalian				0.0168	ACTA2,CCN2,ICAM1,OCLN
3,5-diiodothyronine		chemical - endogenous mammalian		0.152	bias	0.0168	AK1,ENO1,ENO3,SLC2A4
ZFP36	1.687	transcription regulator		-0.111	bias	0.017	FOS,FOSL1,ICAM1,IL1A,IL6,LCN2,LTF,MXD1,PLAUR,PRDM1,SOX6,THBD,TMCC2,TNF,TRAF1,VCAM1
ATF2	-0.143	transcription regulator		-0.503	bias	0.017	ANGPTL2,ASNS,CCND1,CDKN2A,COL24A1,DDIT3,FOS,IL6,MEIS2,PGLYRP2,PPARG,PPARGC1A,SERPINB5,SULT4A1,TNF,VCAM1
6-hydroxydopamine		chemical toxicant		-0.782		0.017	BBC3,BDNF,C3,CEACAM1,DDIT3,FOS,HEPH,HSPA1A/HSPA1B,IL6,MDM2,MMP3,NCAM1,TIMP2,TP53,TRIB3,ZMAT3
dasatinib		chemical drug		-1.169		0.0171	ANKRD1,CCN2,COL1A1,COL1A2,Cxcl11,Cxcl9,PPARGC1A,TP53
indican		chemical - endogenous mammalian		1.178		0.0171	ACTA2,CDH1,EGLN3,GATA3,ICAM1,NOX4,Nppb,TP53
TET3	0.823	enzyme		0.822		0.0171	APLN,EPAS1,FOXG1,ISL1,MGAT5B,SLC43A2,SOX2,SYNE3
CHRNA7		transmembrane receptor		-0.081		0.0171	Flg,IL1RN,IL6,Krt10,TIMP2,TIMP3,TNF,TP53
PBX1	0.978	transcription regulator		1.461	bias	0.0171	AMD1,CDH1,CDKN2B,COL1A1,COL5A2,HOXB2,ISL1,Meis1
indole-3-carbinol		chemical drug		-0.046		0.0171	CCND1,CYP3A5,ESR1,FOS,GATA3,GDF15,RB1,TRAF1
eplerenone		chemical drug		-1.219	bias	0.0171	CCN2,COL1A1,FXYD4,ICAM1,NOX4,PPARG,TNF,VCAM1
AGER	-0.364	transmembrane receptor		0.182		0.0175	ARG1,CCND1,CTSK,F3,ICAM1,IFIT1,IL6,MMP3,PDGFB,TNC,TNF,TP53,TUBB3,VCAM1
PRNP	-1.25	other		-0.037		0.0175	CCND1,CDKN2A,CSGALNACT1,FOSL1,GJA1,HSPA1A/HSPA1B,IL6,MDM2,MMP11,PLAUR,SNAP25,TCF7L1,TNF,TP53
CAT	1.892	enzyme		-0.792		0.0177	Abcb1b,BDNF,CAV1,COL1A1,CYP1B1,IL6,TAGLN,TNC,TP53,VCAM1,VIM
FOSL2	2.74	transcription regulator		1.166		0.0177	BDNF,COL1A2,F3,Flg,FOSL1,HPGD,LORICRIN,MMP3,SERPINB2,SOX4,TP53
INSIG1	0.422	other		-1.992	bias	0.0177	CXCL6,DDIT3,FABP5,FADS1,FADS2,FDPS,IDI1,IL6,LCN2,MRC1,PDX1,PLA2G4F,PPARG,RAB27A,SCD,STARD4,STEAP2,VNN1
ASXL1	0.153	transcription regulator		-1.134	bias	0.0178	FAM162A,HOXA10,HOXA11,PDCD4,PELI2,PPARG,RARRES2,SCD,SLC2A4
AGTR1		G-protein coupled receptor		0.44		0.0178	ACE2,CCND1,CP,FOS,GSTA5,GSTM5,IL6,MGST1,Nppb
naringenin		chemical - endogenous non-mammalian		0.03		0.0178	ACTA2,BDNF,CLDN4,COL1A1,GJA1,PGR,PPARGC1A,SOAT2,VIM
fisetin		chemical drug		-0.047	bias	0.0178	CCND1,CDH1,CTSK,FOS,ICAM1,NFATC1,TP53,TRAF1,VIM
LGR4	2.458	transmembrane receptor		-1.315		0.0179	CDH1,ESR1,HAL,IL1A,IL6,TNF,VIM,WNT4,WNT5A,WNT7A
AURK		group	Activated	2.53	bias	0.0179	AEN,ANK1,BBC3,BTG2,CRACR2B,INKA2,MDM2,TCEA3,TNFRSF10A,VWCE
CALR	0.58	transcription regulator		-0.013		0.0179	CEBPA,COL1A1,COL1A2,CRABP2,DDIT3,GJA1,ICAM1,SCNN1A,TNF,TP53
ANLN	-1.629	other	Activated	2.53	bias	0.0179	AEN,ANK1,BBC3,BTG2,CRACR2B,INKA2,MDM2,TCEA3,TNFRSF10A,VWCE
TXN	0.416	enzyme		0.018		0.0179	C5,CDKN2A,CYP1B1,ESR1,FOS,ICAM1,IL1A,IL6,TNF,TP53
ID1	1.695	transcription regulator		0.3		0.0184	CCN2,CCND1,CDKN2A,CEACAM1,DTX4,GATA3,ICAM1,PPARGC1A,PROM1,SCD,SOX2,TNF,VIM
ZBTB10	1.062	other		1.816	bias	0.0186	C5,CCL24,CD1D,CD34,Cxcl9,ESR1,Gm5431,HLA-E,Ifi202b,Ifi47,IFIT1,Ifitm1,Ifitm6,IL1RN,IL6,ISG15,LRRK2,LY9,Mx1,PTPN22,SERINC5,Tgtp1/Tgtp2,TIGIT,TNF
SH3TC2	-6.386	other		1.134	bias	0.0188	FDPS,IDI1,MPZ,MVD,NSDHL,PMP22,Pou3f1
RYR2		ion channel		-1.134		0.0188	DDIT3,IL6,KRT8,PPARA,PPARGC1A,SCN4B,UGGT2
CDH11	2.814	other	Activated	2.646	bias	0.0188	CCN5,JUP,MMP15,MMP7,PIK3R1,SERPINB5,TFAP2C
miR-223-3p (miRNAs w/seed GUCAGUU)		mature microRNA		0.314	bias	0.0188	CCND1,IL6,PDX1,SLC2A4,SOX6,TGFBR3,VIM
miR-133a-3p (and other miRNAs w/seed UUGGUCC)		mature microRNA	Inhibited	-2.005	bias	0.0188	CCN2,FSCN1,HCN2,KCNH2,KRT7,SLC2A4,TNF
GABARAPL2	0.111	other		1.134	bias	0.0188	AHNAK2,CRYAB,CSPG4,LAMB3,PDGFB,SCPEP1,SERINC2
silymarin		chemical drug		-1.3		0.0188	Abcb1b,ICAM1,IL6,PDX1,PPARGC1A,TNF,TNFSF10
dicarbethoxydihydrocollidine		chemical toxicant		0.796		0.0188	KRT19,PROM1,TNF,UBD,VCAM1,WNT10A,WNT7A
IL1A	4.738	cytokine	Activated	3.149	bias	0.019	ADAMTS1,ADAMTS5,ADORA2B,ALDH1A3,ASIC1,C3,Clec2d (includes others),CTSK,CXCL6,CYP3A5,F2RL1,FOS,FOSL1,GNB4,ICAM1,IGFBP5,IL1A,IL1RN,IL6,KITLG,LCN2,LOX,MMP3,PDGFB,PDZK1IP1,PLA2G4A,PPARG,Saa3,SERPINB4,SSTR2,TNF,TNFRSF11B,VCAM1,VIM,WNT5A
DDX5	-0.094	enzyme		-0.547	bias	0.0193	ACTA2,BBC3,CCND1,FOS,FOSL1,HTRA1,LCN2,NDUFA4,NET1,S100A4,TP53,WNT5A
rotenone		chemical toxicant		-0.718		0.0193	AR,CCND1,CLDN7,DDIT3,FOS,GJA1,IL6,PDGFB,TIMP2,TNF,TP53,VCAM1
emodin		chemical drug		-0.721		0.0193	AR,ARG1,CDH1,CLDN4,CYP1B1,ICAM1,IL6,MRC1,OCLN,TNF,VCAM1,VIM
Sn50 peptide		chemical toxicant		-0.885	bias	0.0193	CCN2,GJA1,ICAM1,IL6,MMP7,PPARG,PTGDS,SLC8A1,TNF,TNFSF10,TP53,VCAM1
desoxycorticosterone		chemical - endogenous mammalian		1.972	bias	0.0198	CCN2,COL1A1,FOS,NOX4,TNF
bevacizumab		biologic drug		1.109		0.0198	ANGPT1,CDH1,CXCL6,PGF,VIM
VSIR	0.032	other		-0.6		0.0198	Cxcl9,PPARG,SCD,SLC2A4,TNF
C1QTNF1	0.14	other		-0.088		0.0198	IL6,NOX4,SCNN1A,SCNN1B,TNF
FNDC5		other		0.555	bias	0.0198	ALPL,BDNF,COL1A1,PRDM16,TNFRSF11B
FZD9		G-protein coupled receptor	Activated	2.216	bias	0.0198	CDH1,CXCL14,CXCL6,Ifi202b,ISG15
FKBP4	0.519	enzyme		0.372		0.0198	C3,CEACAM1,HOXA10,PPARG,TNF
mir-379		microRNA		0.243	bias	0.0198	BMP2,BMP6,CDH1,PTPRN,TP53
DDR1	0.849	kinase		-1.446		0.0198	CDH1,CDKN2A,COL1A1,TP53,VCAM1
CCAT2		other		-0.408		0.0198	ACTA2,CCND1,CDH1,MMP7,VIM
S1PR3	0.323	G-protein coupled receptor		1.987	bias	0.0198	ACTA2,FOS,ICAM1,TAGLN,VCAM1
ECM1	0.403	transporter		-1.56		0.0198	ARG1,CDH1,PTHLH,S100A4,VIM
7-nitroindazole		chemical reagent				0.0198	FOS,MAP2,NCAM1,NOS1,PRKG1
polyamines		chemical - other	Activated	2.2		0.0198	CEBPA,DDIT3,PPARG,SAT1,TP53
nimodipine		chemical drug		0.447	bias	0.0198	BDNF,CYP3A5,FOS,ODC1,TNF
bombesin		chemical - endogenous mammalian		1.342		0.0198	GREB1,IGFBP3,PMEPA1,TMPRSS2,ZBTB16
KT5823		chemical - kinase inhibitor		-1.231		0.0198	AQP5,FOS,PLAUR,SLC12A4,SLC2A4
IL31		other		0.186		0.0199	BDNF,CISH,NPY1R,RB1,TRPA1,VGF
KDM4A	-0.129	transcription regulator		0.277		0.0199	CHD5,Cxcl11,Cxcl9,FHL1,SOX2,TTYH1
SKI	0.986	transcription regulator		0.155		0.0199	ACTA2,BCL11B,CDH1,MPZ,ODC1,PMP22
MBD1	0.215	transcription regulator				0.0199	ALOX12B,CDH1,CDKN2A,ESR1,PROM1,SLCO3A1
TWNK	-0.224	enzyme	Activated	2.433		0.0199	ASNS,ATF5,COL10A1,DDIT3,GDF15,TRIB3
dipyridamole		chemical drug		0.816		0.0199	BDNF,IL6,Nppb,TIMP2,TNF,TP53
CLEC4G		other		1.36		0.02	AREG,ARG1,BMP2,CCN2,EBF1,FLT3,GAS1,IL6,NOTCH3,THBS4,TNF
AIP	0.292	transcription regulator		0.161		0.02	ACKR3,ADGRG6,CDKN2A,CYP1B1,F2RL1,GNG11,NPY1R,Pde4d,PDE9A,PPARA,TP53
TXNIP	-0.836	other		1.754		0.02	CCND1,COL1A2,DES,ENO1,ICAM1,IDH1,IL6,NOX4,PPARA,PPARGC1A,STARD4
IL6R	-0.302	transmembrane receptor	Activated	2.943		0.0201	A2M,ACTA2,CCK,COL1A1,COL1A2,CXCL6,GREM1,ICAM1,IGFBP5,IL6,LCN2,MMP3,TNF,TNFRSF11B,VCAM1
MDK	1.403	growth factor		1.572	bias	0.0201	ACTA2,FOSL1,IL6,LGALS1,PTN,TAGLN,TNF,WNT5A
NLRP12		other		-1.448		0.0201	CXCL6,HLA-A,HLA-E,ICAM1,IL1RN,IL6,TNF,TRAF3
PLAT	-0.125	peptidase		1.851		0.0201	ANGPT1,BDNF,CCND1,DDIT3,FOS,IL6,MMP3,TNF
2,4-dinitrofluorobenzene		chemical toxicant	Activated	2.39	bias	0.0201	ARG1,Cxcl9,ICAM1,NQO1,OCLN,PPARA,Sprr2d,TNF
THRA	-0.281	ligand-dependent nuclear receptor		0.509		0.0203	CCND1,CEBPA,Cxcl11,DES,DOCK9,EHHADH,FOS,HCN2,IL6,MMP7,Nppb,PDX1,PGR,PPARG,PPARGC1A,PROM1,RB1,SFRP2,SLC2A4,THRB,TNF,TP53,Ugt1a7c
KDM6A	0.829	enzyme		1.294	bias	0.0205	CDHR2,CLDN8,COL1A1,CSPG4,ENO3,ICAM1,Muc4,RNF186,UPK1B,VCAM1
NOS3	1.085	enzyme		-0.219		0.0205	ACE2,BMP2,CCN2,F3,ICAM1,IL6,Nppb,SLC2A4,TNF,VCAM1
BSG	0.05	transporter		0.588		0.0205	CCND1,CDH1,CXCL6,EPAS1,G6PC3,IL1A,MMP3,PLAUR,TNF,VIM
SHC1	-0.243	other		0.131		0.0205	Cxcl11,Cxcl9,DAPL1,EDN2,FOS,GDA,HS3ST1,ICAM1,IL13RA2,KRT7,NQO1,THBD,WNT3A
chloroquine		chemical drug		0.422		0.0205	ADAMTS5,COL1A1,DRAM1,GJA1,IL6,LEPR,LIFR,NT5E,RORC,TNF,TNFSF10,TNFSF13B,TP53
NR4A2	1.057	ligand-dependent nuclear receptor		0.076		0.0206	AREG,CCND1,CHIT1,COL1A1,GPLD1,IL23R,KCNMA1,KITLG,MMP3,PLCH2,PRKAA2,SESN3,SLC2A4,SLC39A8,TNF,TSC22D3
CSF1R	0.714	kinase		0.728	bias	0.0206	ARG1,CCND1,FMOD,FOS,IL1A,IL6,MRC1,PGR,VCAM1
D-galactosamine		chemical - endogenous mammalian	Activated	2.419	bias	0.0206	FOS,GDF15,ICAM1,IL33,IL6,PTN,SDC3,TNF,TNFSF10
ETS1	0.151	transcription regulator		1.33	bias	0.0209	ARL4C,B4GALT5,BCL11A,CAV1,CCN2,CCND1,CDKN2A,COL1A2,HPGD,HSPA1A/HSPA1B,ICAM1,IKZF2,ITGA10,ITGAE,ITGB6,Klra7 (includes others),KRT8,MDM2,MMP3,MMP7,NQO1,PERP,PGR,PRDM1,PTHLH,PTPRN2,SERPINB5,SERPINB6,Serpinb9b,TNF,TP53,TRPC1
VEGFA	1.181	growth factor		1.34	bias	0.021	ACTA2,ADAMTS1,AK4,ALDH2,ANGPT1,BMP2,CAV1,CCN2,CCND1,CD34,CDKN2A,CEACAM1,CLDN7,COL1A1,CXCL6,E2F2,EXOC3L2,F3,FOS,GJA1,HES1,ICAM1,IGFBP4,IGFBP5,IL6,MMP15,NFATC1,NFATC2,OCLN,PDGFB,PNPLA2,PPARGC1A,RGS5,Stfa1 (includes others),TBC1D8,TFPI2,THBD,TNC,TNF,TP53,VCAM1
POU4F1		transcription regulator		0.544		0.021	ADGRG2,BNC1,CNTN2,EYA1,GATA3,IRX1,IRX3,ISL2,KCNMA1,NTRK3,PIEZO2,PLCH2,Pmaip1,RGMA,SALL3,SCN7A,SLC6A17,SNAP25
MAPT	-0.94	other		-0.728		0.0211	A2M,ALDH5A1,Anp32a,ATP1A3,ATP1B1,BASP1,BDNF,C1R,C1S,C3,CALML3,CAPN2,CCND1,CKMT1A/CKMT1B,CPLX2,DOK6,DPYSL2,DPYSL3,EIF5A2,ENO1,EPHX1,FBXL16,FLNC,FOS,GALNT15,GRIN1,GSTM5,HLA-A,HSPA1A/HSPA1B,IGFBP2,IL1A,IL1RN,IL6,ISG15,LTC4S,LY9,MAP1B,MAP2,MAP6,MSN,Mt3,Mx1,NAPB,NMNAT2,NOS1,PAK3,PDPN,PKP3,Plscr2,RARRES2,SLC16A3,SLC1A5,SLC43A3,SNAP25,TGM1,TM4SF1,TMCO4,TMEM212,TNF,Tpm2,TUBA3E,TUBB3,UNC13A,UNC13C,VCAM1,V…
Gsk3		group		-0.579		0.0215	BBC3,CCND1,CDH1,CEBPA,DDIT3,ESR1,FOS,FSCN1,GDF15,ICAM1,IL6,PPARG,TNF,TP53
PTPN11	0.09	phosphatase		0.735		0.0215	CCND1,CEBPA,FOS,IL6,LTF,MDM2,NFATC1,PERP,PLAUR,TNF,TP53,TP63,TP73,ZMAT3
IL2RG	-2.536	transmembrane receptor		1.786		0.0216	ARHGAP45,ARMCX2,Cxcl9,FOS,HLA-A,IL6,ISG15,Klra7 (includes others),MFNG,Mx1,SPRR1A,TNF
OTX2		transcription regulator	Activated	2.359	bias	0.0216	A2M,CPXM2,ENPP2,FLVCR2,FOXG1,NCAM1,PRDM1,PTPRZ1,SAG,SOX2,THBS4,TNC
sulindac		chemical drug		0.651		0.0216	ALOX15,CCND1,CYP1B1,E2F2,ERBB3,LAD1,MYCL,NQO1,PLA2G4A,RB1,SERPINB1,TP53
Salmonella enterica serotype abortus equi lipopolysaccharide		chemical toxicant	Activated	2.3	bias	0.0224	ACKR3,ADORA2B,AREG,ASNS,ATP1B1,CDKN2B,F3,FOSL1,GJB2,HES1,HS3ST3B1,IL1A,IL6,ISG15,OSGIN1,PLA1A,PLAC8,RHOU,SERPINB2,STARD4,SYNPO2,TFPI2,TNF,TRAF1,WNT5A
GABARAPL1	0.798	other		1.134	bias	0.0225	AHNAK2,CRYAB,CSPG4,LAMB3,PDGFB,SCPEP1,SERINC2
vismodegib		chemical drug		-0.973		0.0225	IL6,PPARG,SOX2,TNF,TNFRSF10A,TNFRSF11B,TNFSF10
RACK1	-0.499	enzyme		-0.24		0.0225	COL1A2,FOS,ISG15,MDM2,PSCA,RB1,TP63
IRAK3	0.593	kinase		0.19		0.0225	ACTA2,CCN2,COL1A1,GPR84,IL6,TNF,VIM
carbenoxolone		chemical toxicant		1.434		0.0225	CCN2,COL1A1,DEPP1,FXYD4,IL6,LOX,NOX4
stearic acid		chemical - endogenous mammalian		0.935		0.0225	DDIT3,F2RL1,ICAM1,IL6,PPARGC1A,SLC2A4,TNF
IRF6	6.917	transcription regulator		0.917		0.0226	ADAMTS5,ARG1,ENPP2,GRHL3,IL6,LCN2,MRC1,OVOL1,PPARG,PPARGC1A,SLC7A2
berberine		chemical drug		0.945		0.0228	Abcb1b,CCND1,COX6A2,CYP3A5,ICAM1,IL6,MDM2,PCSK9,PIK3R3,PPARA,PPARG,RORC,SAT1,SCD,SPHK1,TNF,TP53,VCAM1,VIM
5-hydroxytryptamine		chemical - endogenous mammalian		1.167	bias	0.0228	ANGPT1,ARC,ASIC1,BDNF,BIN1,CCN2,COL23A1,CYP1B1,DUOX2,F3,FOS,ICAM1,IL1A,IL6,MAPK13,SERPINB2,SLC6A4,TNF,VCAM1
SERPINE1	0.485	other		-1.207		0.0228	ACTA2,ANKRD1,CCN2,CDH1,CDKN2A,CHKA,FBLN2,FOS,FXYD6,IL6,PLAUR,TP53,VIM
mir-27		microRNA		-1.122		0.0228	BMP2,EDAR,ESR1,HOXA10,HOXA11,IL6,PNPLA2,PPARA,PPARG,SEMA6A,SLC2A4,TNF,WNT3A
mir-34		microRNA		0.806	bias	0.0228	AR,AXL,CCND1,CNTN2,CPLX2,CTNND2,EFNB1,FOSL1,KCNH2,SATB2,TNF,TP53,TUBB3
PRKD1	3.492	kinase	Activated	2.042		0.0228	CCND1,CD5,Cxcl11,CXCL6,Cxcl9,F3,IL6,LOXL3,MMP3,PPARGC1A,TNF,TNFRSF11B,VCAM1
tyrphostin AG 1478		chemical drug		-1.656	bias	0.0228	AREG,CAV1,CCND1,F3,FBN1,FOS,HAS2,ICAM1,IL13RA2,IL6,SPHK1,TFPI2,VCAM1
KLF6	-0.818	transcription regulator		1.188		0.0229	ALDOC,ARG1,BMP2,CDH1,COL1A1,ICAM1,IL1A,IL6,KRT4,MRC1,MSLN,PPARA,PPARG,PRDM1,SLC16A3,TFPI2,TNF,VCAM1
pyrrolidine dithiocarbamate		chemical reagent	Inhibited	-2.069	bias	0.0229	BMP2,CCN2,COL1A1,CXCL6,Cxcl9,FAM3B,GCLM,ICAM1,IL1A,IL6,MMP7,MST1R,PDX1,PPARA,PPARG,SLC2A4,TNF,VCAM1
NUPR1	1.805	transcription regulator		-0.769		0.023	ACSS1,ACTA2,ADGRL3,AEN,AGRN,ALDH5A1,ALDOC,ANK1,AREG,ASIC1,ATP8B1,BCL9,CERK,COL1A2,CXADR,DAGLA,DDIT3,DENND5B,DEPTOR,DNMT3B,EPGN,EPHA7,FAM114A1,FAM162A,FAM83G,FZD8,GDF15,GNE,HSPA2,IL13RA1,LHFPL2,MEGF9,MMD,MXD1,NGFR,OSBPL6,P4HA2,PIK3R1,PMP22,PODNL1,PPFIBP2,PPP1R15A,PXDC1,RAB29,RAB38,RFTN2,RNF122,S100A4,SAMD4A,SAT1,SIPA1L2,SIX4,SLC2A12,SLC39A8,ST6GALNAC6,SUOX,TCAF2,TDRKH,TOB1,TP53,TRIB3,VIM,WNK1,ZFP3…
16,16-dimethylprostaglandin E2		chemical - endogenous mammalian		0.919		0.0233	FOS,IL1RN,PTGER4,TNF
EPHB2	6.18	kinase		1.982		0.0233	EPHB2,GRIN1,SPRR1A,TNF
ANTXR2	-2.465	transmembrane receptor		-0.283		0.0233	CCND1,CDH1,KITLG,VIM
SOX2-OT		other		0.272		0.0233	CDH1,PROM1,SOX2,VIM
ATP6AP2	-0.002	transporter		1.981	bias	0.0233	ACTA2,IL6,NOX4,SCNN1A
STAT1/3/5 dimer		complex	Activated	2	bias	0.0233	CISH,EPAS1,MMP3,TIMP3
SLC30A7	0.871	transporter		0		0.0233	ALOX12,EPHX1,EPHX4,SLC27A1
DEPTOR	-2.802	other		1.199	bias	0.0233	CDH1,ICAM1,VCAM1,VIM
TOP1	1.041	enzyme		-0.422		0.0233	ASNS,F3,MYO6,TP53
HSD11B2		enzyme		-0.254		0.0233	CCN2,COL1A1,SCNN1A,TSC22D3
PIAS2	-0.347	transcription regulator				0.0233	AR,Cdkn1c,CDKN2B,FOS
RB1CC1	0.052	other		1.067		0.0233	ALDH1A3,CCND1,CDKN2B,RB1
ARF6	-0.007	transporter				0.0233	IL6,ISG15,NGFR,TNF
8-hydroxyeicosapentaenoic acid		chemical - endogenous mammalian		-1		0.0233	EHHADH,IL6,PPARG,TNF
UBR5	-0.437	enzyme		1.067	bias	0.0233	BBC3,CCND1,GREB1,MDM2
BEX2		other		-0.762		0.0233	BBC3,ITGB6,MAP2,PLXNC1
CXCL1		cytokine		0.762	bias	0.0233	ICAM1,IL6,MRAS,TNF
NDP		growth factor		-1.131		0.0233	BDNF,EDN2,NDUFA4L2,SERPINF1
KU-60019		chemical drug		1		0.0233	ARG1,IL6,PYCARD,TNF
biotin		chemical - endogenous mammalian				0.0233	BDNF,CYP1B1,PC,PMP22
bisphenol A diglycidyl ether		chemical reagent		-1		0.0233	ACTA2,CDH1,EGLN3,ICAM1
1-((2-chlorophenyl)diphenylmethyl)-1H-pyrazole		chemical reagent				0.0233	CTSK,PGR,TNF,VIM
mesalamine		chemical drug		1.964		0.0233	HPGD,ODC1,PPARA,PPARG
trientine		chemical drug		-0.686		0.0233	IGFBP2,IGFBP3,IGFBP4,IGFBP5
pepstatin		chemical - protease inhibitor		-1.982		0.0233	BMP2,CAV1,IL13RA2,TNFRSF11B
tetrathiomolybdate		chemical drug		-1		0.0233	ACTA2,COL1A1,IL1A,VCAM1
diaminopimelic acid		chemical - endogenous non-mammalian		1.934	bias	0.0233	Cxcl9,IL6,ISG15,TNF
androstenediol		chemical - endogenous mammalian		0.958	bias	0.0233	AR,ESR1,FKBP5,TMPRSS2
IFN type 1		group	Activated	2.069		0.0234	CGAS,Cxcl11,Cxcl9,IFIT1,IL22RA1,IL6,ISG15,Mx1,TNFSF10,TNFSF13B
TIMP3	3.539	other		-0.711		0.0234	BAMBI,FOS,IL6,ITGB6,LAMC2,SMAD6,TGFBR3,TNF,VIM,WNT11
HSPA5	-1.014	enzyme		0.512		0.0234	ATF6,CDH1,DDIT3,ESR1,IDI1,IFIT1,IL6,ISG15,NQO1,SCD
mirdametinib		chemical drug		-0.046		0.0236	CHKA,DEPTOR,MRC1,SLC34A1,TBX3,TFCP2L1,TNFRSF10A,VCAM1
xanthohumol		chemical drug		0.174	bias	0.0236	CCND1,DGAT2,FOS,ICAM1,NFATC1,NQO1,SCD,TNF
TANK	0.09	other		-0.34		0.0236	Cxcl11,Cxcl9,IFIT1,IL1A,IL6,PLA1A,TNF,TSC22D1
mir-130		microRNA		0.428		0.0236	AQP4,ARG1,IL6,LCN2,LTF,MRC1,PPARA,TNF
GNB2	-0.483	enzyme				0.0236	ARC,Crisp1/Crisp3,FOSL2,JAG2,PRDM1,PTGER4,THBD,TSC22D3
UBE2I	0.08	enzyme		1.89		0.0236	CCND1,CEBPA,MYLIP,PPARG,PPARGC1A,PRDM16,SCNN1A,SLC2A4
formaldehyde		chemical - endogenous mammalian		1.67	bias	0.0236	CCK,FOS,FOSL1,FOSL2,GRIN1,Gstt1,NGFR,TNF
lysophosphatidylcholine		chemical - other		0.378	bias	0.0237	BDNF,F3,FABP5,FADS2,GJA1,GPR132,ICAM1,IL6,MVD,NSDHL,PLAUR,PPARG,SCD,TNF
SKIL	1.173	transcription regulator		0.018		0.0238	ACTA2,ADAM12,CDH1,CDH11,COL1A2,DIXDC1,NETO2,SLC1A5,THBS2
DPP4	0.327	peptidase		0.182		0.0238	CDH1,Cxcl9,IL1A,IL1RN,IL6,Mx1,SLC2A4,TIMP2,TNF
POSTN	4.384	other		0.266		0.0238	ACTA2,CDH1,HES1,LOX,LOXL1,LOXL3,PDGFB,PTN,VIM
sulforafan		chemical drug		-0.507		0.0238	Akr1c12/Akr1c13,AOX1,ATG9B,CCND1,EPHX1,FOS,GATA3,GCLM,GPX2,GSTA5,GSTM5,ICAM1,IL6,KRT17,MST1R,NQO1,SLC6A4,TNF,TP53,UGT1A6,VCAM1,VIM
olomoucine		chemical - kinase inhibitor				0.0238	DDIT3,MAP2,RB1
Histone H2b		group				0.0238	HTATIP2,Ifi47,TNFSF10
sesamol		chemical - endogenous mammalian				0.0238	IL6,PGR,TNF
triamcinolone hexacetonide		chemical drug				0.0238	ICAM1,IL1A,TNF
ZNF100		transcription regulator				0.0238	DDAH1,ENPP5,POSTN
RDH10	-0.372	enzyme				0.0238	CLDN3,SFRP1,SFRP2
ZNF85		transcription regulator				0.0238	DDAH1,ENPP5,POSTN
ZNF254		transcription regulator				0.0238	DDAH1,ENPP5,POSTN
PTK		group				0.0238	A2M,IL6,TNF
SLC5A8		transporter				0.0238	TNFRSF10A,TNFSF10,TP53
RASSF8	-0.193	other				0.0238	DDAH1,ENPP5,POSTN
FIRRE		other				0.0238	IL1A,TNF,VCAM1
ZNF431		transcription regulator				0.0238	DDAH1,ENPP5,POSTN
antisense oligonucleotide		biologic drug				0.0238	GJA1,TP53,ZMAT3
FNIP1	-0.282	other				0.0238	MB,PPARGC1A,ZBTB16
QRFP	-7.702	other				0.0238	CEBPA,PPARG,SLC27A1
ZNF521	2.487	transcription regulator				0.0238	CTSK,NFATC1,PPARG
EIF2B5	0.316	translation regulator				0.0238	IL6,PPP1R15A,TAGLN
HLA-DQ		complex				0.0238	FOS,IL6,TNF
DUSP10	-0.495	phosphatase				0.0238	IL6,TNF,TP53
SNTA1	0.896	other				0.0238	AQP4,DTNA,NOS1
AGR2	0.764	other				0.0238	AREG,CDKN2A,FOS
CBR3-AS1		other				0.0238	CCND1,CDH1,VIM
STRA6	1.517	transporter				0.0238	PPARG,RBP1,RXRA
PDE3A	1.318	enzyme				0.0238	CCND1,PTHLH,TP53
ZNF665	-0.284	other				0.0238	DDAH1,ENPP5,POSTN
DLC1	1.641	other				0.0238	CDH1,CDKN2A,CDKN2B
ZNF528		other				0.0238	DDAH1,ENPP5,POSTN
P2RY1	7.91	G-protein coupled receptor				0.0238	FOS,IL6,VCAM1
IGFBP4	-5.261	other				0.0238	ACTA2,IGFBP3,IGFBP6
ZNF43	0.229	transcription regulator				0.0238	DDAH1,ENPP5,POSTN
ZNF429		transcription regulator				0.0238	DDAH1,ENPP5,POSTN
RASGRP4	-0.275	other				0.0238	IL13RA2,IL6,TNF
ZNF423	0.865	transcription regulator				0.0238	ADCY3,PPARG,SMAD6
SHCBP1	0.076	other				0.0238	CCND1,PROM1,SOX2
ADCYAP1R1	0.211	G-protein coupled receptor				0.0238	ARC,BDNF,FOS
YWHAB	0.35	other				0.0238	CCND1,SCNN1A,TAGLN
RAPGEF4	1.173	other				0.0238	CTSK,NFATC1,TP53
TNFRSF14	1.02	transmembrane receptor				0.0238	F2RL1,POSTN,TNF
KLKB1	4.511	peptidase				0.0238	F3,ICAM1,VCAM1
PLAC8	2.898	other				0.0238	CCND1,RB1,TP53
USP21	-0.002	peptidase				0.0238	GATA3,IL6,ISG15
glyceraldehyde-BSA		chemical reagent				0.0238	CEBPA,PPARG,TP53
methylglyoxal-BSA		chemical reagent				0.0238	CEBPA,PPARG,TP53
ZNF708		other				0.0238	DDAH1,ENPP5,POSTN
triacetyl-3-hydroxyphenyladenosine		chemical reagent				0.0238	ARG1,LCAT,TNF
15-E2-isoketal modified phosphatidylethanolamine		chemical reagent				0.0238	DDIT3,ICAM1,VCAM1
6-methylsulfinylhexyl isothiocyanate		chemical reagent				0.0238	GSTA5,IL6,NQO1
trimethyltin		chemical reagent				0.0238	FOS,IL6,TNF
warfarin		chemical drug				0.0238	MGP,PDGFB,PROS1
2,3-dioxo-6-nitro-7-sulfamoylbenzo(f)quinoxaline		chemical reagent				0.0238	BDNF,GRIK5,IL6
DDT		chemical toxicant				0.0238	CYP3A5,LTF,PGR
polyphosphate		chemical - endogenous mammalian				0.0238	BMP2,ICAM1,VCAM1
miR-508-3p inhibitor		chemical reagent				0.0238	CDH1,CLDN1,VIM
2,4-dinitrothiocyanatobenzene		chemical toxicant				0.0238	NQO1,Sprr2d,TNF
borrelia burgdorferi strain B31 peptidoglycan		chemical reagent				0.0238	IL1A,IL6,TNF
miR-127 prodrug		chemical reagent				0.0238	CERK,SOX11,SOX12
vinpocetine		chemical drug				0.0238	ICAM1,TNF,VCAM1
PNPLA2	-2.217	enzyme		-0.483		0.0242	ACOT2,ARG1,CEBPA,DGAT2,ICAM1,IL6,PNPLA2,PPARA,PPARG,PPARGC1A,TNF,TP53
metformin		chemical drug	Inhibited	-2.583		0.0242	ACTA2,ARG1,ATF6,BAMBI,BMP2,CAV1,CCN2,CCND1,CYP1B1,CYP3A5,DDIT3,ENO3,F3,FOS,Ifi47,IL13RA1,IL17RB,IL1RN,IL22RA1,IL6,LCAT,PDX1,PGR,PPARGC1A,RARRES2,SERPINF1,SLC2A4,SORT1,TNF,TP53,TP63
NEDD9	0.772	other		-1.425		0.0243	BMP2,BMPR1B,CACNA1G,CDH1,ELF3,FOS,GDF15,MAL2,PLAC8,PLOD2,Podxl,PPP2R2C,SLC1A1,TENT5A,VIM
PSEN1	0.221	peptidase		0.053		0.0244	Anp32a,ARC,ARHGDIG,ATP1A3,ATP1B1,AXL,BASP1,BDNF,C1R,C1S,C3,CALML3,CCND1,CKMT1A/CKMT1B,CPLX2,DPYSL2,EIF5A2,ELOVL4,ENO1,ENPP2,FOS,GJA1,GRIN1,HES1,HLA-E,IL6,KCNAB2,Klra7 (includes others),L1CAM,MAP2,MAP6,Mt3,NAPB,NCAM1,NOS1,PAK3,PIK3R1,PKP3,PPARG,PTPRF,RBPJ,SNAP25,SYT13,TNF,TNXB,TP53,TP73,Tpm2,TUBA3E,TUBB3,VSNL1
bosentan		chemical drug	Inhibited	-2.425	bias	0.0244	ACTA2,COL1A2,F3,ICAM1,MSN,TNF
UBA1	0.431	enzyme		1.633	bias	0.0244	CCND1,DDIT3,NOS1,TAGLN,TP53,VIM
BMPER	1.267	other		-1.546		0.0244	ACTA2,CDH1,ICAM1,MGP,SOX7,VCAM1
PLD1	1.274	enzyme		-0.241		0.0244	DDIT3,IL13RA2,Pmaip1,PROM1,RB1,TP73
IGFBP5	2.487	other		0.02		0.0244	CCND1,COL1A1,F3,MPZ,SFN,TP53
RLN2		other		0.742		0.0244	ACTA2,EDNRB,FOS,MMP3,NOS1,PYCARD
USP19	-0.04	peptidase		-0.721		0.0244	DDIT3,FBXO32,FKBP5,IL6,LCN2,TNF
HOXA5	1.104	transcription regulator		0.714	bias	0.0244	COL1A1,MDM2,PGR,PTN,SAT1,TP53
GNL3	-0.784	other		0.115		0.0244	CDKN2A,CDKN2B,KRT18,MSX1,RB1,TP53
MLN120B		chemical drug	Inhibited	-2.412	bias	0.0244	CTSK,CXCL6,ICAM1,IL6,MMP3,TNF
P2RX7	-0.288	ion channel		1.673	bias	0.0244	CAPN2,IL1A,IL23R,IL6,TNF,TNFSF10
IL37		cytokine		-1.834	bias	0.0244	BMP2,IL1A,IL1RN,IL6,TNF,VCAM1
chrysin		chemical - endogenous non-mammalian		-0.447		0.0244	ADORA2B,AQP3,GCLM,ICAM1,NT5E,UGT1A1
7-ketocholesterol		chemical - endogenous mammalian		-0.64		0.0244	DDIT3,FDPS,GNAI1,ICAM1,NOX4,TP53
Ni2+		chemical reagent		0.933	bias	0.0244	ASNS,CXCL6,ICAM1,IL1A,IL6,VCAM1
mir-210		microRNA	Inhibited	-2.114	bias	0.0246	ACVR1B,ALDH5A1,ARG1,BDNF,CCN2,CDH1,CDKN2A,EFNA3,EPHA3,FAM102A,GDE1,MDGA1,NCAM1,NDUFA4,NUP210,SCARA3
bisindolylmaleimide I		chemical drug		-1.476	bias	0.0248	ALPL,AQP3,CCN2,CLDN1,E2F2,FOS,GDF15,HAS2,ICAM1,IL6,MMP7,OCLN,PDCD4,PTGDS,TNF,TNFSF10,TRAF1,WNK4
HNF1A		transcription regulator		0.33	bias	0.025	ACAT2,ACE2,Akr1c12/Akr1c13,AKR1C3,Alox12e,AQP3,B3GALT5,BMP3,C1S,C5,CCND1,CDHR2,CLDN8,COL27A1,COX6A2,EBF1,ELF3,FCAMR,FOXA3,FUT10,FUT9,FXYD3,GATM,GOT1,GPR137B,GPX2,GRTP1,HAL,HAO1,HGFAC,HOPX,Klra7 (includes others),LCAT,Muc4,NR1H4,PAFAH2,PATJ,PAX5,PCSK9,PDX1,PIGR,PLA1A,PLCB1,RAB37,RNF186,SEMA4A,SERPING1,SGK2,SLC5A1,SLC7A2,SLCO3A1,SOAT2,SPO11,TMPRSS2,TMPRSS4,UGT1A1,Ugt1a7c,VLDLR,WNK4,ZNF365,ZNF442
NFE2L2	0.556	transcription regulator		1.58		0.0252	ACE2,ALDH3A1,AOX1,BDNF,C5,CBR1,CCN2,CDH1,CEBPA,COL1A1,CTSK,CXCL6,DDIT3,EPAS1,EPHX1,FKBP5,GCLM,GNA11,GOT1,GPX2,GPX3,Gsta4,GSTA5,GSTM5,GSTO1,Gstt1,HTATIP2,ICAM1,IDH1,IL1A,IL1RN,IL6,ISG15,ITGB7,KRT4,L1CAM,ME1,MGST1,MKRN3,MST1R,NFE2L3,NQO1,OSGIN1,PKIA,Pmaip1,PPARG,PPARGC1A,Ptprd,RGS11,SAT1,SLC1A1,SLC1A4,TNF,TP53,UGT1A1,UGT1A6,VCAM1,VSNL1,Xlr3c (includes others)
NMDA Receptor		complex		0.277	bias	0.0253	ARC,BDNF,FOS,NCAM1,NOS1
CYB561A3	-0.834	enzyme		-0.447		0.0253	ACTG2,ALDOC,ATF5,COTL1,HSPA1A/HSPA1B
PPP4R3B	0.246	other				0.0253	BCL11B,DLX1,IRX1,IRX3,TUBB3
hemoglobin		complex	Activated	2.236	bias	0.0253	GCLM,IL6,ME1,MGST1,NQO1
ghrelin		biologic drug		0.749		0.0253	FOS,IL6,SCD,TNF,TNFRSF11B
GPR132	3.006	G-protein coupled receptor		-0.831		0.0253	ARG1,ICAM1,IL6,MRC1,TNF
PHB2	0.054	transcription regulator		-1.109		0.0253	AREG,BMP2,GJA1,PGR,RORC
CHEK2	1.41	kinase		1.342	bias	0.0253	MDM2,OCLN,Pmaip1,TP53,TP73
GSN	-1.886	other		1.506		0.0253	ACTA2,COL1A1,PDCD4,PLAUR,POSTN
ATXN7	0.114	other				0.0253	BASP1,BBC3,IGFBP5,Marcks,VSNL1
RPS6KA3	0.723	kinase		0.457	bias	0.0253	DDIT3,FOS,FSCN1,TNF,TRAF3
INT-767		chemical drug		-1.274		0.0253	CYP7B1,FGF19,IL6,MRC1,TNF
YY2		transcription regulator		-0.447		0.0253	FOS,MYL7,Nppb,SOX2,TP53
CH-223191		chemical reagent		0.374		0.0253	ACTA2,COL1A1,COL1A2,NT5E,OCLN
superoxide		chemical - endogenous mammalian		0.762		0.0253	AVPR1A,CAV1,ICAM1,IL6,MARCKSL1
melphalan		chemical drug		-0.363		0.0253	BBC3,MICB,TNF,TP53,TP73
NCOR2	-1.028	transcription regulator		-1.562		0.0254	AR,C3,CCND1,CEBPA,FOS,IL1A,IL6,NFATC1,PDGFB,PGR,RORC
heme		chemical - endogenous mammalian		-0.784		0.0254	CLDN1,CXCL6,Cxcl9,ICAM1,IL1A,IL6,LCN2,MRC1,PRDM1,SPIC,TNF
HMOX1	-0.907	enzyme		-0.943		0.0264	ACTA2,ANGPT1,AQP1,BDNF,CCND1,COL1A1,FOS,GPX3,ICAM1,IL1RN,IL6,MRC1,Nppb,NQO1,RORC,THBD,THBS2,TNF,TP53,VCAM1
IGF1R	-0.756	transmembrane receptor	Activated	2.515		0.0264	ACTA2,ANKRD1,AQP4,BMP2,Cabp1,CAVIN3,CD109,CDH1,CEBPA,COL18A1,COL1A1,COX6A2,DDIT3,DES,Elf5,ESR1,FLNC,FOS,HTRA1,IGFBP2,IGFBP3,IGFBP4,IGFBP5,IL1A,IL6,INHA,KRT19,KRT5,KRT6B,Mcpt8,NDUFA4,PDLIM2,PROM1,S100A4,SCARA5,TIMP3,TNF,TNFSF10,TP53,Tpm2
pregnenolone carbonitrile		chemical drug		1.187		0.0265	Abcb1b,CYP3A5,ITGB6,SCD,SORL1,SPHK1,UGT1A1,UGT1A3,UGT1A4,UGT1A6
MAP2K5	-0.408	kinase		1.289	bias	0.0265	ALDOC,CCND1,FDPS,FOS,IDI1,MVD,Nppb,NSDHL,SOAT2,STARD4
CAY10585		chemical reagent				0.0265	ADORA2B,NT5E
GY1-22		chemical reagent				0.0265	CCND1,TP53
PDGF receptor tyrosine kinase inhibitor IV		chemical drug				0.0265	COL1A2,IL6
lopinavir		chemical drug				0.0265	DDIT3,TNFRSF11B
ergosterol-5,8-peroxide		chemical - endogenous mammalian				0.0265	CCN2,VCAM1
glycodeoxycholic acid		chemical - endogenous mammalian				0.0265	HPGD,IL6
PDK		group				0.0265	IL6,TNF
mycosporine-like amino acid		chemical reagent				0.0265	FOS,HAS2
NONMMUG036351		other				0.0265	CEBPA,PPARG
1-palmitoyl-2-arachidonoyl-phosphatidylcholine		chemical - endogenous mammalian				0.0265	CCND1,IL6
AMOT	0.22	other				0.0265	ANKRD1,CCN2
Stat1-Stat3		complex				0.0265	A2M,FOS
hexa-D-arginine		biologic drug				0.0265	GJA1,PTGFR
prochloraz		chemical reagent				0.0265	CYP1B1,ODC1
FREM1	0.274	other				0.0265	FRAS1,NPNT
SOCS2-AS1		other				0.0265	TMPRSS2,TNFSF10
RFFL	1.254	enzyme				0.0265	MDM2,TP53
ARF4	-0.376	enzyme				0.0265	CLDN4,OCLN
HOXA-AS3		other				0.0265	CDH1,VIM
SELENOK	-0.113	other				0.0265	IL6,TNF
IL10R		group				0.0265	IL12RB1,IL23R
SMYD2	-0.135	enzyme				0.0265	GREB1,PGR
SPON2		other				0.0265	IL6,TNF
SMCR8	0.254	other				0.0265	IL6,TNF
NDUFAF3	0.063	other				0.0265	CCND1,ESR1
KLF14		transcription regulator				0.0265	PPARGC1A,SPHK1
SENP8	-0.212	peptidase				0.0265	MDM2,TP73
ZFP64	0.185	transcription regulator				0.0265	IL6,TNF
avexitide		biologic drug				0.0265	FOS,NOX4
MLLT1	0.36	transcription regulator				0.0265	HOXA11,HOXA13
TMEM208	-0.016	other				0.0265	KCNN4,SLC12A4
potassium channel		group				0.0265	FOS,SCNN1A
COQ7	-0.279	enzyme				0.0265	ARG1,TNF
AMOTL1	0.835	other				0.0265	ANKRD1,CCN2
SUCO	1.19	other				0.0265	COL1A1,COL1A2
SCARB2	0.839	transmembrane receptor				0.0265	IL6,TNF
ganglioside GM3 (d18:1/16:0)		chemical - endogenous mammalian				0.0265	IL6,TNF
ganglioside GM3 (d18:1/24:0)		chemical - endogenous mammalian				0.0265	IL6,TNF
ganglioside GM3 (d18:1/24:1(15Z))		chemical - endogenous mammalian				0.0265	IL6,TNF
TH17 Cytokine		group				0.0265	IL6,LGALS1
thymopentin		chemical drug				0.0265	IL6,TNF
TSIX		other				0.0265	COL1A1,COL1A2
YEATS4	0.084	transcription regulator				0.0265	CDKN2A,TP53
LPXN	-1.265	transcription regulator				0.0265	ACTA2,TAGLN
satratoxin G		chemical toxicant				0.0265	IL6,TNF
[truncated: 860 more rows]

## Sheet: TKO-intra VS Normal WT IPA-CP
TKO-intra VS Normal female WT IPA canonical pathways
Ingenuity Canonical Pathways	-log(p-value)	Ratio	z-score	Molecules
Hepatic Fibrosis / Hepatic Stellate Cell Activation	13.2	0.284	#NUM!	ACTA2,BAMBI,CCN2,CCR5,COL11A1,COL12A1,COL13A1,COL16A1,Col17a1,COL18A1,COL1A1,COL1A2,COL23A1,COL24A1,COL28A1,COL3A1,COL4A1,COL4A2,COL5A1,COL5A2,COL5A3,COL6A1,COL6A2,COL6A3,COL7A1,COL8A1,EDNRA,EDNRB,FGF2,Flt1,FLT4,FN1,IGF1,IGF1R,IGFBP3,IGFBP5,IL10RA,KDR,LBP,MET,MMP2,MYH1,MYH7B,MYL1,MYO5C,PDGFB,PDGFC,PDGFRA,PDGFRB,SERPINE1,SMAD3,TGFB3,TNF,TNFRSF11B,VCAM1
Axonal Guidance Signaling	10.7	0.191	#NUM!	ACE,ACE2,ADAM12,ADAM19,ADAM33,ADAMTS1,ADAMTS12,ADAMTS15,ADAMTS16,ADAMTS2,ADAMTS4,ADAMTS5,ADAMTS8,ADAMTS9,AKT3,ARHGEF15,BDNF,BMP10,BMP8A,CXCL12,CXCR4,DPYSL2,DPYSL5,EFNA2,EFNA3,EPHA3,EPHA7,EPHB2,EPHB3,FYN,GLI3,GNAI1,GNAO1,GNB4,GNG2,GNG4,IGF1,ITGA1,ITGA11,ITGA8,ITGA9,ITGAX,ITGB3,ITGB8,KALRN,MET,MICAL1,MMP12,MMP17,MMP2,MMP3,MMP7,MYL1,NFATC2,NFATC4,NGF,NRP1,NRP2,PAPPA,PDGFB,PDGFC,PIK3R3,PLCB1,PLCB2,PL…
Cellular Effects of Sildenafil (Viagra)	9.56	0.275	#NUM!	ACTA2,ADCY1,ADCY2,ADCY3,ADCY5,ADCY7,CACNA1A,CACNA1B,CACNA1C,CACNA1E,CACNA2D1,CACNB2,CACNB4,CACNG4,CAMK4,GUCY1A2,GUCY1B1,ITPR3,KCNN3,KCNN4,KCNQ3,MYH1,MYH7B,MYL1,MYLK,MYO5C,NOS3,NPR2,PDE2A,PDE3A,PDE4A,PDE4B,PDE4D,PLCB1,PLCB2,PLCB4,PLCD3,PLCH1,PLCL2,PRKAR1B,PRKG1
Circadian Rhythm Signaling	7.04	0.201	#NUM!	ADCY1,ADCY2,ADCY3,ADCY5,ADCY7,ADRB1,BDNF,BHLHE40,CACNA1A,CACNA1B,CACNA1C,CACNA1E,CACNA1G,CACNA1I,CACNA2D1,CACNB2,CACNB4,CACNG4,CAMK2D,CREB5,FYN,GNAI1,GNB4,GNG2,GNG4,GRIA2,GRIA3,GRIN1,GRIN2D,GUCY1A2,GUCY1B1,H3-3A/H3-3B,HIF1A,HLF,ITPR3,MAP2K6,MDM2,NGF,NPR2,PLCB1,PLCB2,PLCB4,PLCD3,PLCH1,PLCL2,PRKAB2,PRKAR1B,PRKCB,PRKD1,PRKG1,RASD1,RORA,RORB,TRPC6
GABA Receptor Signaling	6.66	0.248	#NUM!	ABAT,ADCY1,ADCY2,ADCY3,ADCY5,ADCY7,ALDH5A1,CACNA1A,CACNA1B,CACNA1C,CACNA1E,CACNA1G,CACNA1I,CACNA2D1,CACNB2,CACNB4,CACNG4,DNM1,GABBR1,GABBR2,GABRB1,GABRP,GNAI1,GNAO1,GNB4,GNG2,GNG4,GUCY1B1,ITPR3,KCNN3,KCNN4,KCNQ3,UBD
Molecular Mechanisms of Cancer	6.65	0.172	#NUM!	ADCY1,ADCY2,ADCY3,ADCY5,ADCY7,AKT3,ARHGEF15,ARHGEF16,ARHGEF17,ARHGEF19,ARHGEF9,AURKA,BCL2L1,BMP10,BMP8A,BRCA1,CAMK2D,CCND1,CCNE1,CCNE2,CDC25B,CDH1,CDK14,CDK18,CDKN2A,CHEK1,E2F6,E2F7,E2F8,FYN,GAB2,GNAI1,GNAO1,GNB4,GNG2,GNG4,GUCY1B1,HDAC11,HDAC9,HIF1A,IRS1,ITGA1,ITGA11,ITGA8,ITGA9,ITGAX,ITGB3,ITGB8,LRP1,MAP2K6,MAPK13,MDM2,NFKBIA,PIK3R3,PLCB1,PLCB2,PLCB4,PRKAR1B,PRKCB,PRKD1,RAC2,RAC3,RASD1,RHOJ,RHOQ…
Gap Junction Signaling	6.24	0.212	#NUM!	ACTA2,ADCY1,ADCY2,ADCY3,ADCY5,ADCY7,ADRB1,AKT3,CAV1,CCN3,DBN1,GJA1,GJB3,GJB6,GJC1,GNAI1,GRIA2,GRIA3,GRIK2,GUCY1A2,GUCY1B1,HTR2A,HTR2B,ITPR3,NPR2,PIK3R3,PLCB1,PLCB2,PLCB4,PLCD3,PLCH1,PLCL2,PRKAR1B,PRKCB,PRKD1,PRKG1,RASD1,TUBA1A,TUBB,TUBB3,TUBB6,TUBG1
[truncated: 577 more rows]

## Sheet: TKO-intra VS Normal WT IPA-UR
TKO-intra VS Normal female WT IPA upstream regulator
Upstream Regulator	Expr Log Ratio	Molecule Type	Predicted Activation State	Activation z-score	Flags	p-value of overlap	Target Molecules in Dataset	Mechanistic Network
[truncated: 3,476 more rows]

## Sheet: MB49_intra.vs.CMV_intra.UP.C2
GSEA MB49-intra VS CMV-intra UP
[truncated: 669 more rows]

## Sheet: MB49_intra.vs.CMV_intra.DOWN.C2
GSEA MB49-intra VS CMV-intra DOWN
[truncated: 692 more rows]
